# Supplementary material for: Crystal chemistry of type paulkerrite and establishment of the paulkerrite group nomenclature
Source: Copernicus journal article supplement (doi:10.5194/ejm-35-909-2023), 2023-11-01
Supplement: Supplementary file 1 [file ejm-35-909-2023-supplement.pdf]

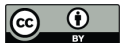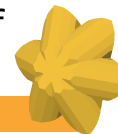

*Supplement of*

## **Crystal chemistry of type paulkerrite and establishment of the paulkerrite group nomenclature**

**Ian E. Grey et al.**

*Correspondence to:* Ian E. Grey ([ian.grey@csiro.au](mailto:ian.grey@csiro.au))

The copyright of individual parts of the supplement might differ from the article licence.

```
#=====
data_global
#=====

_audit_creation_method          'Jana2006 Version : 25/03/2021'

# 1. PROCESSING SUMMARY (IUCr Office Use Only)

_journal_date_recd_electronic   ?
_journal_date_to_coeditor       ?
_journal_date_from_coeditor     ?
_journal_date_accepted          ?
_journal_date_printers_first    ?
_journal_date_printers_final    ?
_journal_date_proofs_out        ?
_journal_date_proofs_in         ?
_journal_coeditor_name          ?
_journal_coeditor_code          ?
_journal_coeditor_notes        ; ?
;
_journal_techeditor_code        ?
_journal_paper_category         ?
_journal_techeditor_notes      ; ?
;
_journal_coden_ASTM             ?
_journal_name_full              'Acta Crystallographica Section C'
_journal_year                   ?
_journal_volume                 ?
_journal_issue                  ?
_journal_page_first             ?
_journal_page_last              ?
_journal_suppl_publ_number      ?
_journal_suppl_publ_pages       ?

#=====

# 2. SUBMISSION DETAILS

_publ_contact_author_name       ?
_publ_contact_author_address   ; ?
;
_publ_contact_author_email      ?
_publ_contact_author_fax        ?
_publ_contact_author_phone      ?

_publ_requested_journal         'Acta Crystallographica Section C'
_publ_requested_category        ?

_publ_contact_letter
```

```
; ?  
;
```

```
#####
```

```
# 3. TITLE AND AUTHOR LIST
```

```
_publ_section_title  
; ?  
;  
_publ_section_title_footnote  
; ?  
;  
loop_  
  _publ_author_name  
  _publ_author_footnote  
  _publ_author_address  
; ?      # name  
;  
; ?      # footnote  
;  
; ?      # address  
;
```

```
#####
```

```
# 4. TEXT
```

```
_publ_section_synopsis  
; ?  
;  
_publ_section_abstract  
; ?  
;  
_publ_section_comment  
; ?  
;  
_publ_section_introduction  
; ?  
;  
_publ_section_experimental  
; ?  
;  
_publ_section_exptl_prep  
; ?  
;  
_publ_section_exptl_refinement  
; ?  
;  
_publ_section_exptl_solution  
; ?  
;  
_publ_section_discussion  
; ?
```

```
;  
_publ_section_acknowledgements  
; ?  
;  
_publ_section_references  
;  
Petricek, V., Dusek, M. & Palatinus L. (2014). Z. Kristallogr. 229(5), 345-352.  
  
Palatinus L. & Chapuis G. (2007). J. Appl. Cryst. 40, 786-790.  
  
# enable this reference if Diamond ver. 2 was used for visualization  
#Brandenburg, K. (1999). DIAMOND. Version. 2.1c.  
#Crystal Impact GbR, Bonn, Germany.  
  
# enable this reference if Diamond ver. 3 was used for visualization  
#Brandenburg, K. & Putz, H. (2005). DIAMOND Version 3.  
#Crystal Impact GbR, Postfach 1251, D-53002 Bonn, Germany.  
  
# enable this reference if SIR97 was used for solving of the structure  
#Altomare, A., Burla, M. C., Camalli, M., Cascarano, G., Giacovazzo, C.,  
#Guagliardi, A., Moliterni, A. G. G., Polidori, G., Spagna, R. (1997).  
#SIR97. A Package for Crystal Structure Solution by Direct Methods  
#and Refinement, Bari, Rome, Italy.  
  
# use this reference if SIR2002 was used for solving of the structure  
#Burla, M.C., Camalli, M., Carrozzini, B., Cascarano, G., Giacovazzo, C.,  
#Polidori, G., Spagna, R.  
#SIR2002: the program, J. Appl. Cryst, (2003). 36, 1103  
  
# use this reference if SIR2011 was used for solving of the structure  
#Burla, M.C., Caliandro, R., Camalli, M., Carrozzini, B., Cascarano,  
#G.L., Giacovazzo, C., Mallamo. M., Mazzone, A., Polidori, G., Spagna, R.  
#SIR2011: a new package for crystal structure determination and refinement,  
#J.Appl.Cryst. (2012) 45, 357-361  
  
# enable this reference if bond valences were calculated  
#Brown, I. D. (1996). J. Appl. Cryst. 29, 479-480.  
  
# enable this reference if Xshape wase used for crystal shape refinement  
#Stoe & Cie (1998). X-SHAPE. Stoe & Cie, Darmstadt, Germany.  
  
# enable this reference if Flack coefficient was refined  
#Flack, H. D. (1983). Acta Cryst. A39, 876-881.  
;  
_publ_section_figure_captions  
; ?  
;  
_publ_section_table_legends  
; ?  
;  
  
#=====
```

data\_I

#=====

## # 5. CHEMICAL DATA

```

_chemical_name_systematic
; ?
;
_chemical_name_common           ?
_chemical_formula_moiety        ?
_chemical_formula_structural    ?
_chemical_formula_analytical    ?
_chemical_formula_iupac         ?
_chemical_formula_sum           'Al2 Fe0.75 H0 K1 Mg0 Mn2 O31 P4 Ti0.5'
_chemical_formula_weight        888.6
_chemical_melting_point         ?
_chemical_compound_source       ?
_chemical_absolute_configuration .

```

#=====

## # 6. CRYSTAL DATA

```

_symmetry_cell_setting          monoclinic
_symmetry_space_group_name_H-M  'P 1 21/c 1'
_symmetry_space_group_name_Hall '-P 2ycb'
_symmetry_Int_Tables_number     14

```

loop\_

```

_space_group_symop_id
_space_group_symop_operation_xyz
1  x,y,z
2  -x,y+1/2,-z+1/2
3  -x,-y,-z
4  x,-y+1/2,z+1/2

```

```

_cell_length_a                  10.569(2)
_cell_length_b                  20.590(4)
_cell_length_c                  12.413(2)
_cell_angle_alpha               90
_cell_angle_beta                90.33(3)
_cell_angle_gamma               90
_cell_volume                     2701.2(9)

```

loop\_

```

_twin_individual_id
_twin_individual_mass_fraction_refined
_twin_individual_twin_matrix_11
_twin_individual_twin_matrix_12
_twin_individual_twin_matrix_13
_twin_individual_twin_matrix_21
_twin_individual_twin_matrix_22
_twin_individual_twin_matrix_23
_twin_individual_twin_matrix_31

```

```
_twin_individual_twin_matrix_32
_twin_individual_twin_matrix_33
? ? ? ? ? ? ? ? ? ? ?
```

```
_cell_formula_units_Z 4
```

```
_cell_measurement_reflns_used 23111
_cell_measurement_theta_min 1.92
_cell_measurement_theta_max 32.02
_cell_measurement_temperature 100
_cell_special_details
; ?
;
```

```
_exptl_crystal_density_diffn 2.1851
_exptl_crystal_density_meas ?
_exptl_crystal_density_method ?
_exptl_crystal_F_000 1780
```

```
_exptl_absorpt_coefficient_mu 2.035
_exptl_crystal_description 'blade'
_exptl_crystal_size_max 0.200
_exptl_crystal_size_mid 0.130
_exptl_crystal_size_min 0.025
_exptl_crystal_size_rad ?
_exptl_crystal_colour ?
_exptl_absorpt_correction_type 'multi-scan'
_exptl_absorpt_process_details ?
_exptl_absorpt_correction_T_min 0.41
_exptl_absorpt_correction_T_max 0.75
loop_
_exptl_crystal_face_index_h
_exptl_crystal_face_index_k
_exptl_crystal_face_index_l
_exptl_crystal_face_perp_dist
? ? ? ?
```

```
#=====
```

```
# 7. EXPERIMENTAL DATA
```

```
_exptl_special_details ?
_diffn_ambient_temperature 100
_diffn_source ?
_diffn_source_power ?
_diffn_source_voltage ?
_diffn_source_current ?
_diffn_radiation_type 'synchrotron'
_diffn_radiation_source 'synchrotron'
_diffn_radiation_wavelength 0.7109
_diffn_radiation_monochromator ?
_diffn_measurement_device 'image plate'
_diffn_measurement_device_type 'Dectris Eiger'
```

```

_diffrn_detector ?
_diffrn_detector_area_resol_mean ?
_diffrn_measurement_method ?
_diffrn_measurement_specimen_support ?

_diffrn_reflns_number 23111
_diffrn_reflns_theta_min 1.92
_diffrn_reflns_theta_max 32.02
_diffrn_reflns_theta_full 16.6
_diffrn_measured_fraction_theta_max 0.79
_diffrn_measured_fraction_theta_full 0.98
_diffrn_reflns_av_R_equivalents 0.1286
_diffrn_reflns_av_unetI/netI 0.1231
_diffrn_reflns_limit_h_min -15
_diffrn_reflns_limit_h_max 15
_diffrn_reflns_limit_k_min -28
_diffrn_reflns_limit_k_max 28
_diffrn_reflns_limit_l_min -18
_diffrn_reflns_limit_l_max 18
_diffrn_reflns_reduction_process ?

_diffrn_standards_number ?
_diffrn_standards_interval_count ?
_diffrn_standards_interval_time ?
_diffrn_standards_decay_% ?
loop_
_diffrn_standard_refl_index_h
_diffrn_standard_refl_index_k
_diffrn_standard_refl_index_l
  ? ? ?

_diffrn_radiation_probe X-ray

#=====

# 8. REFINEMENT DATA

_refine_special_details
; ?
;

_reflns_number_total 6830
_reflns_number_gt 2711
_reflns_threshold_expression 'I>3\s(I)'

_refine_ls_structure_factor_coef F
_refine_ls_R_factor_gt 0.0914
_refine_ls_wR_factor_gt 0.1019
_refine_ls_R_factor_all 0.2403
_refine_ls_wR_factor_ref 0.1162
_refine_ls_goodness_of_fit_ref 1.98
_refine_ls_goodness_of_fit_gt 2.80
_refine_ls_restrained_S_gt ?
_refine_ls_restrained_S_all ?

```

## paulkerrite.cif

```
_refine_ls_number_reflns      6830
_refine_ls_number_parameters   175
_refine_ls_number_restraints   0
_refine_ls_number_constraints   0
_refine_ls_weighting_scheme    sigma
_refine_ls_weighting_details    'w=1/(\s^2^(F)+0.0001F^2^)'
_refine_ls_hydrogen_treatment  'constr'
_refine_ls_shift/su_max        0.0000
_refine_ls_shift/su_mean       0.0000
_refine_diff_density_max       1.74
_refine_diff_density_min      -1.92
_refine_ls_extinction_method    'none'
_refine_ls_extinction_coef     ?
_refine_ls_extinction_expression ?
_refine_ls_abs_structure_details ?
_refine_ls_abs_structure_Flack  ?
_refine_ls_abs_structure_Rogers ?
```

## loop\_

```
_atom_type_symbol
_atom_type_scatter_dispersion_real
_atom_type_scatter_dispersion_imag
_atom_type_scatter_source
Al  0.0645  0.0514
'International Tables Vol C tables 4.2.6.8 and 6.1.1.1'
Fe  0.3463  0.8444
'International Tables Vol C tables 4.2.6.8 and 6.1.1.1'
H   0.0000  0.0000
'International Tables Vol C tables 4.2.6.8 and 6.1.1.1'
K   0.2009  0.2494
'International Tables Vol C tables 4.2.6.8 and 6.1.1.1'
Mg  0.0486  0.0363
'International Tables Vol C tables 4.2.6.8 and 6.1.1.1'
Mn  0.3368  0.7283
'International Tables Vol C tables 4.2.6.8 and 6.1.1.1'
O   0.0106  0.0060
'International Tables Vol C tables 4.2.6.8 and 6.1.1.1'
P   0.1023  0.0942
'International Tables Vol C tables 4.2.6.8 and 6.1.1.1'
Ti  0.2776  0.4457
'International Tables Vol C tables 4.2.6.8 and 6.1.1.1'
```

```
_computing_data_collection    ?
_computing_cell_refinement     ?
_computing_data_reduction      ?
_computing_structure_solution  ?
_computing_structure_refinement ?
_computing_molecular_graphics  ?
_computing_publication_material ?
```

## loop\_

```
_restr_distance_atom_site_label_1
_restr_distance_site_symmetry_1
_restr_distance_atom_site_label_2
```



```
_restr_distance_site_symmetry_2  
_restr_distance_target  
_restr_distance_target_weight_param  
? ? ? ? ? ?
```

```
loop_  
_restr_angle_atom_site_label_1  
_restr_angle_site_symmetry_1  
_restr_angle_atom_site_label_2  
_restr_angle_site_symmetry_2  
_restr_angle_atom_site_label_3  
_restr_angle_site_symmetry_3  
_restr_angle_target  
_restr_angle_target_weight_param  
? ? ? ? ? ? ? ?
```

```
loop_  
_restr_torsion_atom_site_label_1  
_restr_torsion_site_symmetry_1  
_restr_torsion_atom_site_label_2  
_restr_torsion_site_symmetry_2  
_restr_torsion_atom_site_label_3  
_restr_torsion_site_symmetry_3  
_restr_torsion_atom_site_label_4  
_restr_torsion_site_symmetry_4  
_restr_torsion_angle_target  
_restr_torsion_weight_param  
? ? ? ? ? ? ? ? ? ?
```

```
loop_  
_restr_equal_distance_atom_site_label_1  
_restr_equal_distance_site_symmetry_1  
_restr_equal_distance_atom_site_label_2  
_restr_equal_distance_site_symmetry_2  
_restr_equal_distance_class_class_id  
_restr_equal_distance_class_target_weight_param  
? ? ? ? ? ?
```

```
loop_  
_restr_equal_angle_atom_site_label_1  
_restr_equal_angle_site_symmetry_1  
_restr_equal_angle_atom_site_label_2  
_restr_equal_angle_site_symmetry_2  
_restr_equal_angle_atom_site_label_3  
_restr_equal_angle_site_symmetry_3  
_restr_equal_angle_class_class_id  
_restr_equal_angle_class_target_weight_param  
? ? ? ? ? ? ? ?
```

```
loop_  
_restr_equal_torsion_atom_site_label_1  
_restr_equal_torsion_site_symmetry_1  
_restr_equal_torsion_atom_site_label_2  
_restr_equal_torsion_site_symmetry_2
```

```

_restr_equal_torsion_atom_site_label_3
_restr_equal_torsion_site_symmetry_3
_restr_equal_torsion_atom_site_label_4
_restr_equal_torsion_site_symmetry_4
_restr_equal_torsion_class_class_id
_restr_equal_torsion_class_target_weight_param
? ? ? ? ? ? ? ? ? ?

```

```
#=====
```

```
# 9. ATOMIC COORDINATES AND DISPLACEMENT PARAMETERS
```

```

loop_
_atom_site_label
_atom_site_type_symbol
_atom_site_fract_x
_atom_site_fract_y
_atom_site_fract_z
_atom_site_adp_type
_atom_site_U_iso_or_equiv
_atom_site_site_symmetry_multiplicity
_atom_site_occupancy
_atom_site_calc_flag
_atom_site_refinement_flags
_atom_site_disorder_assembly
_atom_site_disorder_group
M1a1 Mn 0.49485(10) 0.74723(5) 0.24530(8) Uiso 0.0297(3) 4 0.479(8) d . . .
M1b1 Mn 0.99585(10) -0.24733(5) -0.24350(8) Uiso 0.0297(3) 4 0.438(8) d . . .
M1a2 Mg 0.49485(10) 0.74723(5) 0.24530(8) Uiso 0.0297(3) 4 0.521(8) d . . .
M1b2 Mg 0.99585(10) -0.24733(5) -0.24350(8) Uiso 0.0297(3) 4 0.562(8) d . . .
M2a1 Ti 0.66088(8) 0.50223(4) 0.74653(7) Uiso 0.02885(17) 4 0.39(2) d . . .
M2a2 Al 0.66088(8) 0.50223(4) 0.74653(7) Uiso 0.02885(17) 4 0.12 d . . .
M2a3 Fe 0.66088(8) 0.50223(4) 0.74653(7) Uiso 0.02885(17) 4 0.49(2) d . . .
M2b1 Ti 1.16044(8) -0.00206(4) -0.74405(7) Uiso 0.02885(17) 4 0.39(2) d . . .
M2b2 Al 1.16044(8) -0.00206(4) -0.74405(7) Uiso 0.02885(17) 4 0.12 d . . .
M2b3 Fe 1.16044(8) -0.00206(4) -0.74405(7) Uiso 0.02885(17) 4 0.49(2) d . . .
M3a1 Fe 0.5 0.5 0.5 Uiso 0.0295(2) 2 0.06(2) d . . .
M3b1 Fe 1 0 -0.5 Uiso 0.0295(2) 2 0.43(2) d . . .
M3a2 Ti 0.5 0.5 0.5 Uiso 0.0295(2) 2 0.94(2) d . . .
M3b2 Ti 1 0 -0.5 Uiso 0.0295(2) 2 0.57(2) d . . .
P2a P 0.58655(12) 0.59178(7) 0.29474(10) Uiso 0.0269(3) 4 1 d . . .
P2b P 1.08682(12) -0.09197(7) -0.29549(10) Uiso 0.0267(3) 4 1 d . . .
P1a P 0.90755(12) 0.59582(7) 0.80049(10) Uiso 0.0271(3) 4 1 d . . .
P1b P 1.40934(12) -0.09561(7) -0.80222(10) Uiso 0.0267(3) 4 1 d . . .
A1a O 0.7163(3) 0.85261(16) 0.0602(2) Uiso 0.0368(4) 4 0.611(9) d . . .
A2a O 1.22187(14) -0.35366(8) -0.05801(12) Uiso 0.0368(4) 4 0.005(10) d . . .
A1b K 0.7163(3) 0.85261(16) 0.0602(2) Uiso 0.0368(4) 4 0.2 d . . .
A2b K 1.22187(14) -0.35366(8) -0.05801(12) Uiso 0.0368(4) 4 0.82 d . . .
X1 O 0.6417(4) 0.50244(15) 0.5963(3) Uiso 0.0292(8) 4 1 d . . .
X2 O 1.1412(3) -0.00324(15) -0.5976(3) Uiso 0.0288(8) 4 1 d . . .
O1a O 0.9041(3) 0.66957(19) 0.8043(3) Uiso 0.0317(8) 4 1 d . . .
O1b O 1.4049(3) -0.1695(2) -0.8022(3) Uiso 0.0360(9) 4 1 d . . .
O2a O 1.0261(3) 0.57226(18) 0.7387(3) Uiso 0.0271(7) 4 1 d . . .

```

paulkerrite.cif

02b 0 1.5254(3) -0.07226(18) -0.7389(3) Uiso 0.0286(8) 4 1 d . . .  
03a 0 0.9094(3) 0.56827(17) 0.9153(3) Uiso 0.0283(8) 4 1 d . . .  
03b 0 1.4129(3) -0.06899(18) -0.9174(3) Uiso 0.0307(8) 4 1 d . . .  
04a 0 0.7866(3) 0.57199(18) 0.7427(3) Uiso 0.0278(8) 4 1 d . . .  
04b 0 1.2881(3) -0.07095(18) -0.7468(3) Uiso 0.0291(8) 4 1 d . . .  
05a 0 0.5938(3) 0.66489(19) 0.2892(3) Uiso 0.0320(8) 4 1 d . . .  
05b 0 1.0945(3) -0.16575(19) -0.2904(3) Uiso 0.0317(8) 4 1 d . . .  
06a 0 0.4670(3) 0.56792(18) 0.2358(3) Uiso 0.0282(8) 4 1 d . . .  
06b 0 0.9661(3) -0.06820(18) -0.2366(3) Uiso 0.0279(8) 4 1 d . . .  
07a 0 0.5851(3) 0.56769(18) 0.4115(3) Uiso 0.0282(8) 4 1 d . . .  
07b 0 1.0839(3) -0.06878(17) -0.4128(3) Uiso 0.0292(8) 4 1 d . . .  
08a 0 0.7058(3) 0.56443(18) 0.2389(3) Uiso 0.0294(8) 4 1 d . . .  
08b 0 1.2062(3) -0.06471(18) -0.2404(3) Uiso 0.0289(8) 4 1 d . . .  
09a 0 0.3477(3) 0.6864(2) 0.1822(3) Uiso 0.0363(9) 4 1 d . . .  
09b 0 0.8468(4) -0.1875(2) -0.1831(3) Uiso 0.0409(10) 4 1 d . . .  
010a 0 0.5755(4) 0.74321(19) 0.0830(3) Uiso 0.0367(9) 4 1 d . . .  
010b 0 1.0809(3) -0.24145(19) -0.0795(3) Uiso 0.0350(9) 4 1 d . . .  
011a 0 0.6414(3) 0.80693(19) 0.3111(3) Uiso 0.0355(9) 4 1 d . . .  
011b 0 1.1461(4) -0.3082(2) -0.3005(3) Uiso 0.0396(9) 4 1 d . . .  
012a 0 0.4026(4) 0.75026(19) 0.4016(3) Uiso 0.0370(9) 4 1 d . . .  
012b 0 0.9073(4) -0.25260(20) -0.4069(3) Uiso 0.0392(9) 4 1 d . . .  
013a 0 0.6645(4) 0.50316(16) 0.9168(3) Uiso 0.0355(9) 4 1 d . . .  
013b 0 1.1619(4) 0.00021(16) -0.9160(3) Uiso 0.0347(9) 4 1 d . . .  
014a 0 0.2585(3) 0.6408(2) 0.4405(3) Uiso 0.0396(10) 4 1 d . . .  
014b 0 0.7610(3) -0.14342(19) -0.4394(3) Uiso 0.0365(9) 4 1 d . . .  
015a 0 0.5376(4) 0.4082(2) 1.0176(3) Uiso 0.0495(11) 4 1 d . . .  
015b 0 1.0223(4) 0.0950(2) -1.0112(3) Uiso 0.0516(12) 4 1 d . . .

loop\_

\_atom\_site\_aniso\_label  
\_atom\_site\_aniso\_type\_symbol  
\_atom\_site\_aniso\_U\_11  
\_atom\_site\_aniso\_U\_22  
\_atom\_site\_aniso\_U\_33  
\_atom\_site\_aniso\_U\_12  
\_atom\_site\_aniso\_U\_13  
\_atom\_site\_aniso\_U\_23  
? ? ? ? ? ? ? ?

loop\_

\_jana\_atom\_site\_ADP\_C\_label  
\_jana\_atom\_site\_ADP\_C\_type\_symbol  
\_jana\_atom\_site\_ADP\_C\_111  
\_jana\_atom\_site\_ADP\_C\_112  
\_jana\_atom\_site\_ADP\_C\_113  
\_jana\_atom\_site\_ADP\_C\_122  
\_jana\_atom\_site\_ADP\_C\_123  
\_jana\_atom\_site\_ADP\_C\_133  
\_jana\_atom\_site\_ADP\_C\_222  
\_jana\_atom\_site\_ADP\_C\_223  
\_jana\_atom\_site\_ADP\_C\_233  
\_jana\_atom\_site\_ADP\_C\_333  
? ? ? ? ? ? ? ? ? ? ? ?

```
loop_  
_jana_atom_site_ADP_D_label  
_jana_atom_site_ADP_D_type_symbol  
_jana_atom_site_ADP_D_1111  
_jana_atom_site_ADP_D_1112  
_jana_atom_site_ADP_D_1113  
_jana_atom_site_ADP_D_1122  
_jana_atom_site_ADP_D_1123  
_jana_atom_site_ADP_D_1133  
_jana_atom_site_ADP_D_1222  
_jana_atom_site_ADP_D_1223  
_jana_atom_site_ADP_D_1233  
_jana_atom_site_ADP_D_1333  
_jana_atom_site_ADP_D_2222  
_jana_atom_site_ADP_D_2223  
_jana_atom_site_ADP_D_2233  
_jana_atom_site_ADP_D_2333  
_jana_atom_site_ADP_D_3333  
? ? ? ? ? ? ? ? ? ? ? ? ? ? ? ?
```

```
loop_  
_jana_atom_site_ADP_E_label  
_jana_atom_site_ADP_E_type_symbol  
_jana_atom_site_ADP_E_11111  
_jana_atom_site_ADP_E_11112  
_jana_atom_site_ADP_E_11113  
_jana_atom_site_ADP_E_11122  
_jana_atom_site_ADP_E_11123  
_jana_atom_site_ADP_E_11133  
_jana_atom_site_ADP_E_11222  
_jana_atom_site_ADP_E_11223  
_jana_atom_site_ADP_E_11233  
_jana_atom_site_ADP_E_11333  
_jana_atom_site_ADP_E_12222  
_jana_atom_site_ADP_E_12223  
_jana_atom_site_ADP_E_12233  
_jana_atom_site_ADP_E_12333  
_jana_atom_site_ADP_E_13333  
_jana_atom_site_ADP_E_22222  
_jana_atom_site_ADP_E_22223  
_jana_atom_site_ADP_E_22233  
_jana_atom_site_ADP_E_22333  
_jana_atom_site_ADP_E_23333  
_jana_atom_site_ADP_E_33333  
? ? ? ? ? ? ? ? ? ? ? ? ? ? ? ? ? ? ? ? ? ?
```

```
loop_  
_jana_atom_site_ADP_F_label  
_jana_atom_site_ADP_F_type_symbol  
_jana_atom_site_ADP_F_111111  
_jana_atom_site_ADP_F_111112  
_jana_atom_site_ADP_F_111113  
_jana_atom_site_ADP_F_111122  
_jana_atom_site_ADP_F_111123
```



M1b1 A1b . 1\_545 5.225(4) ?  
M1b1 A1b . 4\_554 4.391(4) ?  
M1b1 A2b . . 3.967(2) ?  
M1b1 A2b . 4\_544 5.038(3) ?  
M1b1 O1a . 1\_544 2.056(4) ?  
M1b1 O5b . . 2.063(4) ?  
M1b1 O9b . . 2.139(4) ?  
M1b1 O10b . . 2.224(4) ?  
M1b1 O11b . . 2.146(4) ?  
M1b1 O12b . . 2.232(4) ?  
M1a2 P2a . . 3.399(2) ?  
M1a2 P1b . 1\_466 3.410(2) ?  
M1a2 A1b . . 3.941(3) ?  
M1a2 A1b . 4\_565 4.988(4) ?  
M1a2 A2b . 1\_465 5.166(3) ?  
M1a2 A2b . 4\_455 4.378(2) ?  
M1a2 O1b . 1\_466 2.046(4) ?  
M1a2 O5a . . 2.064(4) ?  
M1a2 O9a . . 2.142(4) ?  
M1a2 O10a . . 2.194(4) ?  
M1a2 O11a . . 2.136(4) ?  
M1a2 O12a . . 2.177(4) ?  
M1b2 P2b . . 3.403(2) ?  
M1b2 P1a . 1\_544 3.406(2) ?  
M1b2 A1b . 1\_545 5.225(4) ?  
M1b2 A1b . 4\_554 4.391(4) ?  
M1b2 A2b . . 3.967(2) ?  
M1b2 A2b . 4\_544 5.038(3) ?  
M1b2 O1a . 1\_544 2.056(4) ?  
M1b2 O5b . . 2.063(4) ?  
M1b2 O9b . . 2.139(4) ?  
M1b2 O10b . . 2.224(4) ?  
M1b2 O11b . . 2.146(4) ?  
M1b2 O12b . . 2.232(4) ?  
M2a1 M2a2 . . 0 ?  
M2a1 M2a3 . . 0 ?  
M2a1 M3a1 . . 3.4925(17) ?  
M2a1 M3a2 . . 3.4925(17) ?  
M2a1 P2a . 3\_666 3.2912(19) ?  
M2a1 P2b . 2\_755 3.3501(19) ?  
M2a1 P1a . . 3.3075(19) ?  
M2a1 P1b . 4\_456 3.3334(19) ?  
M2a1 A1b . 4\_565 3.827(3) ?  
M2a1 A2b . 3\_756 5.078(2) ?  
M2a1 X1 . . 1.874(4) ?  
M2a1 O2b . 4\_456 2.041(4) ?  
M2a1 O4a . . 1.957(4) ?  
M2a1 O6a . 3\_666 1.991(4) ?  
M2a1 O8b . 2\_755 1.970(4) ?  
M2a1 O13a . . 2.114(4) ?  
M2a2 M2a3 . . 0 ?  
M2a2 M3a1 . . 3.4925(17) ?  
M2a2 M3a2 . . 3.4925(17) ?  
M2a2 P2a . 3\_666 3.2912(19) ?

M2a2 P2b . 2\_755 3.3501(19) ?  
M2a2 P1a . . 3.3075(19) ?  
M2a2 P1b . 4\_456 3.3334(19) ?  
M2a2 A1b . 4\_565 3.827(3) ?  
M2a2 A2b . 3\_756 5.078(2) ?  
M2a2 X1 . . 1.874(4) ?  
M2a2 O2b . 4\_456 2.041(4) ?  
M2a2 O4a . . 1.957(4) ?  
M2a2 O6a . 3\_666 1.991(4) ?  
M2a2 O8b . 2\_755 1.970(4) ?  
M2a2 O13a . . 2.114(4) ?  
M2a3 M3a1 . . 3.4925(17) ?  
M2a3 M3a2 . . 3.4925(17) ?  
M2a3 P2a . 3\_666 3.2912(19) ?  
M2a3 P2b . 2\_755 3.3501(19) ?  
M2a3 P1a . . 3.3075(19) ?  
M2a3 P1b . 4\_456 3.3334(19) ?  
M2a3 A1b . 4\_565 3.827(3) ?  
M2a3 A2b . 3\_756 5.078(2) ?  
M2a3 X1 . . 1.874(4) ?  
M2a3 O2b . 4\_456 2.041(4) ?  
M2a3 O4a . . 1.957(4) ?  
M2a3 O6a . 3\_666 1.991(4) ?  
M2a3 O8b . 2\_755 1.970(4) ?  
M2a3 O13a . . 2.114(4) ?  
M2b1 M2b2 . . 0 ?  
M2b1 M2b3 . . 0 ?  
M2b1 M3b1 . . 3.4804(17) ?  
M2b1 M3b2 . . 3.4804(17) ?  
M2b1 P2a . 2\_744 3.3614(19) ?  
M2b1 P2b . 3\_754 3.2913(18) ?  
M2b1 P1a . 4\_553 3.3457(19) ?  
M2b1 P1b . . 3.3427(19) ?  
M2b1 A1b . 3\_764 5.160(4) ?  
M2b1 A2b . 4\_544 3.816(2) ?  
M2b1 X2 . . 1.830(4) ?  
M2b1 O2a . 4\_553 2.037(4) ?  
M2b1 O4b . . 1.958(4) ?  
M2b1 O6b . 3\_754 1.984(4) ?  
M2b1 O8a . 2\_744 1.968(4) ?  
M2b1 O13b . . 2.135(4) ?  
M2b2 M2b3 . . 0 ?  
M2b2 M3b1 . . 3.4804(17) ?  
M2b2 M3b2 . . 3.4804(17) ?  
M2b2 P2a . 2\_744 3.3614(19) ?  
M2b2 P2b . 3\_754 3.2913(18) ?  
M2b2 P1a . 4\_553 3.3457(19) ?  
M2b2 P1b . . 3.3427(19) ?  
M2b2 A1b . 3\_764 5.160(4) ?  
M2b2 A2b . 4\_544 3.816(2) ?  
M2b2 X2 . . 1.830(4) ?  
M2b2 O2a . 4\_553 2.037(4) ?  
M2b2 O4b . . 1.958(4) ?  
M2b2 O6b . 3\_754 1.984(4) ?

M2b2 O8a . 2\_744 1.968(4) ?  
M2b2 O13b . . 2.135(4) ?  
M2b3 M3b1 . . 3.4804(17) ?  
M2b3 M3b2 . . 3.4804(17) ?  
M2b3 P2a . 2\_744 3.3614(19) ?  
M2b3 P2b . 3\_754 3.2913(18) ?  
M2b3 P1a . 4\_553 3.3457(19) ?  
M2b3 P1b . . 3.3427(19) ?  
M2b3 A1b . 3\_764 5.160(4) ?  
M2b3 A2b . 4\_544 3.816(2) ?  
M2b3 X2 . . 1.830(4) ?  
M2b3 O2a . 4\_553 2.037(4) ?  
M2b3 O4b . . 1.958(4) ?  
M2b3 O6b . 3\_754 1.984(4) ?  
M2b3 O8a . 2\_744 1.968(4) ?  
M2b3 O13b . . 2.135(4) ?  
M3a1 M3a2 . . 0 ?  
M3a1 P2a . . 3.3055(16) ?  
M3a1 P2a . 3\_666 3.3055(16) ?  
M3a1 P1b . 2\_754 3.2935(16) ?  
M3a1 P1b . 4\_456 3.2935(16) ?  
M3a1 A1b . 2\_645 3.870(3) ?  
M3a1 A1b . 4\_565 3.870(3) ?  
M3a1 X1 . . 1.912(4) ?  
M3a1 X1 . 3\_666 1.912(4) ?  
M3a1 O3b . 2\_754 1.982(4) ?  
M3a1 O3b . 4\_456 1.982(4) ?  
M3a1 O7a . . 1.992(4) ?  
M3a1 O7a . 3\_666 1.992(4) ?  
M3b1 M3b2 . . 0 ?  
M3b1 P2b . . 3.2932(16) ?  
M3b1 P2b . 3\_754 3.2932(16) ?  
M3b1 P1a . 2\_745 3.3095(16) ?  
M3b1 P1a . 4\_553 3.3095(16) ?  
M3b1 A2b . 2\_754 3.8879(19) ?  
M3b1 A2b . 4\_544 3.8879(19) ?  
M3b1 X2 . . 1.929(4) ?  
M3b1 X2 . 3\_754 1.929(4) ?  
M3b1 O3a . 2\_745 1.996(3) ?  
M3b1 O3a . 4\_553 1.996(3) ?  
M3b1 O7b . . 1.988(3) ?  
M3b1 O7b . 3\_754 1.988(3) ?  
M3a2 P2a . . 3.3055(16) ?  
M3a2 P2a . 3\_666 3.3055(16) ?  
M3a2 P1b . 2\_754 3.2935(16) ?  
M3a2 P1b . 4\_456 3.2935(16) ?  
M3a2 A1b . 2\_645 3.870(3) ?  
M3a2 A1b . 4\_565 3.870(3) ?  
M3a2 X1 . . 1.912(4) ?  
M3a2 X1 . 3\_666 1.912(4) ?  
M3a2 O3b . 2\_754 1.982(4) ?  
M3a2 O3b . 4\_456 1.982(4) ?  
M3a2 O7a . . 1.992(4) ?  
M3a2 O7a . 3\_666 1.992(4) ?



M3b2 P2b . . 3.2932(16) ?  
M3b2 P2b . 3\_754 3.2932(16) ?  
M3b2 P1a . 2\_745 3.3095(16) ?  
M3b2 P1a . 4\_553 3.3095(16) ?  
M3b2 A2b . 2\_754 3.8879(19) ?  
M3b2 A2b . 4\_544 3.8879(19) ?  
M3b2 X2 . . 1.929(4) ?  
M3b2 X2 . 3\_754 1.929(4) ?  
M3b2 O3a . 2\_745 1.996(3) ?  
M3b2 O3a . 4\_553 1.996(3) ?  
M3b2 O7b . . 1.988(3) ?  
M3b2 O7b . 3\_754 1.988(3) ?  
P2a A1b . 4\_565 3.741(4) ?  
P2a O5a . . 1.509(4) ?  
P2a O6a . . 1.537(4) ?  
P2a O7a . . 1.532(4) ?  
P2a O8a . . 1.548(4) ?  
P2b A2b . 4\_544 3.737(2) ?  
P2b O5b . . 1.523(4) ?  
P2b O6b . . 1.553(4) ?  
P2b O7b . . 1.533(4) ?  
P2b O8b . . 1.538(4) ?  
P1a A1b . 4\_565 3.747(4) ?  
P1a A2b . 1\_566 3.891(3) ?  
P1a O1a . . 1.520(4) ?  
P1a O2a . . 1.550(4) ?  
P1a O3a . . 1.534(4) ?  
P1a O4a . . 1.542(4) ?  
P1b A1b . 1\_644 3.827(4) ?  
P1b A2b . 4\_544 3.778(2) ?  
P1b O1b . . 1.522(4) ?  
P1b O2b . . 1.531(4) ?  
P1b O3b . . 1.531(4) ?  
P1b O4b . . 1.544(4) ?  
A1a A1b . . 0 ?  
A2a A2b . . 0 ?  
A1b A2b . 1\_465 6.886(4) ?  
A1b A2b . 1\_565 6.988(4) ?  
A1b X1 . 4\_564 3.120(5) ?  
A1b O1a . 4\_564 3.641(5) ?  
A1b O1b . 1\_466 3.744(5) ?  
A1b O2b . 1\_466 3.570(5) ?  
A1b O3b . 1\_466 3.603(5) ?  
A1b O4a . 4\_564 2.842(5) ?  
A1b O5a . 4\_564 3.615(5) ?  
A1b O7a . 4\_564 2.827(5) ?  
A1b O9b . 1\_565 3.428(5) ?  
A1b O10a . . 2.716(5) ?  
A1b O11a . . 3.353(5) ?  
A1b O12b . 4\_555 2.911(5) ?  
A1b O13b . 3\_764 3.751(5) ?  
A1b O15b . 3\_764 3.031(5) ?  
A2b X2 . 4\_545 3.105(4) ?  
A2b O1a . 1\_544 3.790(4) ?

A2b O1b . 4\_545 3.637(4) ?  
 A2b O2a . 1\_544 3.594(4) ?  
 A2b O3a . 1\_544 3.686(4) ?  
 A2b O4b . 4\_545 2.900(4) ?  
 A2b O5b . 4\_545 3.614(4) ?  
 A2b O7b . 4\_545 2.820(4) ?  
 A2b O9a . 1\_645 3.360(4) ?  
 A2b O10b . . 2.762(4) ?  
 A2b O11b . . 3.248(4) ?  
 A2b O12a . 4\_654 2.906(4) ?  
 A2b O13a . 3\_756 3.737(4) ?  
 A2b O15a . 3\_756 2.822(5) ?

## loop\_

\_geom\_angle\_atom\_site\_label\_1  
 \_geom\_angle\_atom\_site\_label\_2  
 \_geom\_angle\_atom\_site\_label\_3  
 \_geom\_angle\_site\_symmetry\_1  
 \_geom\_angle\_site\_symmetry\_2  
 \_geom\_angle\_site\_symmetry\_3  
 \_geom\_angle  
 \_geom\_angle\_publ\_flag  
 M1a2 M1a1 P2a . . . 0 ?  
 M1a2 M1a1 P1b . . 1\_466 0 ?  
 M1a2 M1a1 A1b . . . 0 ?  
 M1a2 M1a1 A1b . . 4\_565 0 ?  
 M1a2 M1a1 A2b . . 1\_465 0 ?  
 M1a2 M1a1 A2b . . 4\_455 0 ?  
 M1a2 M1a1 O1b . . 1\_466 0 ?  
 M1a2 M1a1 O5a . . . 0 ?  
 M1a2 M1a1 O9a . . . 0 ?  
 M1a2 M1a1 O10a . . . 0 ?  
 M1a2 M1a1 O11a . . . 0 ?  
 M1a2 M1a1 O12a . . . 0 ?  
 P2a M1a1 P1b . . 1\_466 178.70(5) ?  
 P2a M1a1 A1b . . . 117.00(6) ?  
 P2a M1a1 A1b . . 4\_565 48.58(5) ?  
 P2a M1a1 A2b . . 1\_465 84.86(4) ?  
 P2a M1a1 A2b . . 4\_455 123.97(4) ?  
 P2a M1a1 O1b . . 1\_466 166.62(12) ?  
 P2a M1a1 O5a . . . 15.24(10) ?  
 P2a M1a1 O9a . . . 73.80(11) ?  
 P2a M1a1 O10a . . . 91.06(11) ?  
 P2a M1a1 O11a . . . 105.51(11) ?  
 P2a M1a1 O12a . . . 89.70(11) ?  
 P1b M1a1 A1b 1\_466 . . 62.25(5) ?  
 P1b M1a1 A1b 1\_466 . 4\_565 130.49(5) ?  
 P1b M1a1 A2b 1\_466 . 1\_465 96.27(4) ?  
 P1b M1a1 A2b 1\_466 . 4\_455 56.41(3) ?  
 P1b M1a1 O1b 1\_466 . 1\_466 14.66(11) ?  
 P1b M1a1 O5a 1\_466 . . 163.46(11) ?  
 P1b M1a1 O9a 1\_466 . . 107.49(11) ?  
 P1b M1a1 O10a 1\_466 . . 88.91(11) ?  
 P1b M1a1 O11a 1\_466 . . 73.20(11) ?

P1b M1a1 O12a 1\_466 . . 90.42(11) ?  
 A1b M1a1 A1b . . 4\_565 113.97(6) ?  
 A1b M1a1 A2b . . 1\_465 97.33(5) ?  
 A1b M1a1 A2b . . 4\_455 116.43(6) ?  
 A1b M1a1 O1b . . 1\_466 69.32(12) ?  
 A1b M1a1 O5a . . . 107.72(11) ?  
 A1b M1a1 O9a . . . 122.76(11) ?  
 A1b M1a1 O10a . . . 41.41(11) ?  
 A1b M1a1 O11a . . . 58.29(11) ?  
 A1b M1a1 O12a . . . 140.75(12) ?  
 A1b M1a1 A2b 4\_565 . 1\_465 131.53(5) ?  
 A1b M1a1 A2b 4\_565 . 4\_455 94.42(5) ?  
 A1b M1a1 O1b 4\_565 . 1\_466 141.87(12) ?  
 A1b M1a1 O5a 4\_565 . . 38.70(11) ?  
 A1b M1a1 O9a 4\_565 . . 112.47(11) ?  
 A1b M1a1 O10a 4\_565 . . 121.41(11) ?  
 A1b M1a1 O11a 4\_565 . . 66.51(11) ?  
 A1b M1a1 O12a 4\_565 . . 61.58(11) ?  
 A2b M1a1 A2b 1\_465 . 4\_455 103.92(4) ?  
 A2b M1a1 O1b 1\_465 . 1\_466 82.55(11) ?  
 A2b M1a1 O5a 1\_465 . . 98.17(11) ?  
 A2b M1a1 O9a 1\_465 . . 25.44(10) ?  
 A2b M1a1 O10a 1\_465 . . 62.21(10) ?  
 A2b M1a1 O11a 1\_465 . . 155.62(11) ?  
 A2b M1a1 O12a 1\_465 . . 114.20(11) ?  
 A2b M1a1 O1b 4\_455 . 1\_466 55.58(11) ?  
 A2b M1a1 O5a 4\_455 . . 126.77(11) ?  
 A2b M1a1 O9a 4\_455 . . 90.99(11) ?  
 A2b M1a1 O10a 4\_455 . . 142.36(11) ?  
 A2b M1a1 O11a 4\_455 . . 88.70(11) ?  
 A2b M1a1 O12a 4\_455 . . 35.79(11) ?  
 O1b M1a1 O5a 1\_466 . . 177.03(15) ?  
 O1b M1a1 O9a 1\_466 . . 92.84(15) ?  
 O1b M1a1 O10a 1\_466 . . 87.08(15) ?  
 O1b M1a1 O11a 1\_466 . . 87.85(15) ?  
 O1b M1a1 O12a 1\_466 . . 91.34(15) ?  
 O5a M1a1 O9a . . . 88.97(15) ?  
 O5a M1a1 O10a . . . 90.71(14) ?  
 O5a M1a1 O11a . . . 90.37(15) ?  
 O5a M1a1 O12a . . . 90.98(15) ?  
 O9a M1a1 O10a . . . 85.81(14) ?  
 O9a M1a1 O11a . . . 178.91(15) ?  
 O9a M1a1 O12a . . . 90.85(15) ?  
 O10a M1a1 O11a . . . 95.07(14) ?  
 O10a M1a1 O12a . . . 176.23(15) ?  
 O11a M1a1 O12a . . . 88.28(14) ?  
 M1b2 M1b1 P2b . . . 0 ?  
 M1b2 M1b1 P1a . . 1\_544 0 ?  
 M1b2 M1b1 A1b . . 1\_545 0 ?  
 M1b2 M1b1 A1b . . 4\_554 0 ?  
 M1b2 M1b1 A2b . . . 0 ?  
 M1b2 M1b1 A2b . . 4\_544 0 ?  
 M1b2 M1b1 O1a . . 1\_544 0 ?  
 M1b2 M1b1 O5b . . . 0 ?

M1b2 M1b1 O9b . . . 0 ?  
M1b2 M1b1 O10b . . . 0 ?  
M1b2 M1b1 O11b . . . 0 ?  
M1b2 M1b1 O12b . . . 0 ?  
P2b M1b1 P1a . . 1\_544 178.19(5) ?  
P2b M1b1 A1b . . 1\_545 85.88(5) ?  
P2b M1b1 A1b . . 4\_554 123.28(5) ?  
P2b M1b1 A2b . . . 117.32(4) ?  
P2b M1b1 A2b . . 4\_544 47.88(3) ?  
P2b M1b1 O1a . . 1\_544 166.25(11) ?  
P2b M1b1 O5b . . . 15.67(10) ?  
P2b M1b1 O9b . . . 74.62(12) ?  
P2b M1b1 O10b . . . 90.53(11) ?  
P2b M1b1 O11b . . . 106.02(12) ?  
P2b M1b1 O12b . . . 89.47(11) ?  
P1a M1b1 A1b 1\_544 . 1\_545 95.81(5) ?  
P1a M1b1 A1b 1\_544 . 4\_554 55.73(5) ?  
P1a M1b1 A2b 1\_544 . . 63.15(4) ?  
P1a M1b1 A2b 1\_544 . 4\_544 130.32(4) ?  
P1a M1b1 O1a 1\_544 . 1\_544 15.11(10) ?  
P1a M1b1 O5b 1\_544 . . 163.07(11) ?  
P1a M1b1 O9b 1\_544 . . 106.65(12) ?  
P1a M1b1 O10b 1\_544 . . 90.83(11) ?  
P1a M1b1 O11b 1\_544 . . 72.73(11) ?  
P1a M1b1 O12b 1\_544 . . 89.19(11) ?  
A1b M1b1 A1b 1\_545 . 4\_554 102.32(6) ?  
A1b M1b1 A2b 1\_545 . . 98.03(5) ?  
A1b M1b1 A2b 1\_545 . 4\_544 132.00(5) ?  
A1b M1b1 O1a 1\_545 . 1\_544 81.39(11) ?  
A1b M1b1 O5b 1\_545 . . 99.89(11) ?  
A1b M1b1 O9b 1\_545 . . 25.77(11) ?  
A1b M1b1 O10b 1\_545 . . 62.94(11) ?  
A1b M1b1 O11b 1\_545 . . 152.92(11) ?  
A1b M1b1 O12b 1\_545 . . 116.05(11) ?  
A1b M1b1 A2b 4\_554 . . 116.78(6) ?  
A1b M1b1 A2b 4\_554 . 4\_544 95.40(5) ?  
A1b M1b1 O1a 4\_554 . 1\_544 55.41(11) ?  
A1b M1b1 O5b 4\_554 . . 125.80(11) ?  
A1b M1b1 O9b 4\_554 . . 89.11(12) ?  
A1b M1b1 O10b 4\_554 . . 143.31(11) ?  
A1b M1b1 O11b 4\_554 . . 91.46(12) ?  
A1b M1b1 O12b 4\_554 . . 36.33(11) ?  
A2b M1b1 A2b . . 4\_544 113.01(4) ?  
A2b M1b1 O1a . . 1\_544 69.91(10) ?  
A2b M1b1 O5b . . . 108.03(11) ?  
A2b M1b1 O9b . . . 123.80(11) ?  
A2b M1b1 O10b . . . 42.27(11) ?  
A2b M1b1 O11b . . . 54.89(11) ?  
A2b M1b1 O12b . . . 138.47(11) ?  
A2b M1b1 O1a 4\_544 . 1\_544 142.52(11) ?  
A2b M1b1 O5b 4\_544 . . 37.11(10) ?  
A2b M1b1 O9b 4\_544 . . 112.81(12) ?  
A2b M1b1 O10b 4\_544 . . 119.75(11) ?  
A2b M1b1 O11b 4\_544 . . 68.31(11) ?

A2b M1b1 O12b 4\_544 . . 60.91(11) ?  
O1a M1b1 O5b 1\_544 . . 177.77(15) ?  
O1a M1b1 O9b 1\_544 . . 91.64(16) ?  
O1a M1b1 O10b 1\_544 . . 88.28(14) ?  
O1a M1b1 O11b 1\_544 . . 87.71(15) ?  
O1a M1b1 O12b 1\_544 . . 91.48(15) ?  
O5b M1b1 O9b . . . 90.27(16) ?  
O5b M1b1 O10b . . . 90.67(14) ?  
O5b M1b1 O11b . . . 90.36(15) ?  
O5b M1b1 O12b . . . 89.60(15) ?  
O9b M1b1 O10b . . . 86.66(15) ?  
O9b M1b1 O11b . . . 178.69(16) ?  
O9b M1b1 O12b . . . 92.36(15) ?  
O10b M1b1 O11b . . . 92.18(15) ?  
O10b M1b1 O12b . . . 178.99(15) ?  
O11b M1b1 O12b . . . 88.80(15) ?  
M1a1 M1a2 P2a . . . 0 ?  
M1a1 M1a2 P1b . . 1\_466 0 ?  
M1a1 M1a2 A1b . . . 0 ?  
M1a1 M1a2 A1b . . 4\_565 0 ?  
M1a1 M1a2 A2b . . 1\_465 0 ?  
M1a1 M1a2 A2b . . 4\_455 0 ?  
M1a1 M1a2 O1b . . 1\_466 0 ?  
M1a1 M1a2 O5a . . . 0 ?  
M1a1 M1a2 O9a . . . 0 ?  
M1a1 M1a2 O10a . . . 0 ?  
M1a1 M1a2 O11a . . . 0 ?  
M1a1 M1a2 O12a . . . 0 ?  
P2a M1a2 P1b . . 1\_466 178.70(5) ?  
P2a M1a2 A1b . . . 117.00(6) ?  
P2a M1a2 A1b . . 4\_565 48.58(5) ?  
P2a M1a2 A2b . . 1\_465 84.86(4) ?  
P2a M1a2 A2b . . 4\_455 123.97(4) ?  
P2a M1a2 O1b . . 1\_466 166.62(12) ?  
P2a M1a2 O5a . . . 15.24(10) ?  
P2a M1a2 O9a . . . 73.80(11) ?  
P2a M1a2 O10a . . . 91.06(11) ?  
P2a M1a2 O11a . . . 105.51(11) ?  
P2a M1a2 O12a . . . 89.70(11) ?  
P1b M1a2 A1b 1\_466 . . 62.25(5) ?  
P1b M1a2 A1b 1\_466 . 4\_565 130.49(5) ?  
P1b M1a2 A2b 1\_466 . 1\_465 96.27(4) ?  
P1b M1a2 A2b 1\_466 . 4\_455 56.41(3) ?  
P1b M1a2 O1b 1\_466 . 1\_466 14.66(11) ?  
P1b M1a2 O5a 1\_466 . . 163.46(11) ?  
P1b M1a2 O9a 1\_466 . . 107.49(11) ?  
P1b M1a2 O10a 1\_466 . . 88.91(11) ?  
P1b M1a2 O11a 1\_466 . . 73.20(11) ?  
P1b M1a2 O12a 1\_466 . . 90.42(11) ?  
A1b M1a2 A1b . . 4\_565 113.97(6) ?  
A1b M1a2 A2b . . 1\_465 97.33(5) ?  
A1b M1a2 A2b . . 4\_455 116.43(6) ?  
A1b M1a2 O1b . . 1\_466 69.32(12) ?  
A1b M1a2 O5a . . . 107.72(11) ?

A1b M1a2 O9a . . . 122.76(11) ?  
A1b M1a2 O10a . . . 41.41(11) ?  
A1b M1a2 O11a . . . 58.29(11) ?  
A1b M1a2 O12a . . . 140.75(12) ?  
A1b M1a2 A2b 4\_565 . 1\_465 131.53(5) ?  
A1b M1a2 A2b 4\_565 . 4\_455 94.42(5) ?  
A1b M1a2 O1b 4\_565 . 1\_466 141.87(12) ?  
A1b M1a2 O5a 4\_565 . . 38.70(11) ?  
A1b M1a2 O9a 4\_565 . . 112.47(11) ?  
A1b M1a2 O10a 4\_565 . . 121.41(11) ?  
A1b M1a2 O11a 4\_565 . . 66.51(11) ?  
A1b M1a2 O12a 4\_565 . . 61.58(11) ?  
A2b M1a2 A2b 1\_465 . 4\_455 103.92(4) ?  
A2b M1a2 O1b 1\_465 . 1\_466 82.55(11) ?  
A2b M1a2 O5a 1\_465 . . 98.17(11) ?  
A2b M1a2 O9a 1\_465 . . 25.44(10) ?  
A2b M1a2 O10a 1\_465 . . 62.21(10) ?  
A2b M1a2 O11a 1\_465 . . 155.62(11) ?  
A2b M1a2 O12a 1\_465 . . 114.20(11) ?  
A2b M1a2 O1b 4\_455 . 1\_466 55.58(11) ?  
A2b M1a2 O5a 4\_455 . . 126.77(11) ?  
A2b M1a2 O9a 4\_455 . . 90.99(11) ?  
A2b M1a2 O10a 4\_455 . . 142.36(11) ?  
A2b M1a2 O11a 4\_455 . . 88.70(11) ?  
A2b M1a2 O12a 4\_455 . . 35.79(11) ?  
O1b M1a2 O5a 1\_466 . . 177.03(15) ?  
O1b M1a2 O9a 1\_466 . . 92.84(15) ?  
O1b M1a2 O10a 1\_466 . . 87.08(15) ?  
O1b M1a2 O11a 1\_466 . . 87.85(15) ?  
O1b M1a2 O12a 1\_466 . . 91.34(15) ?  
O5a M1a2 O9a . . . 88.97(15) ?  
O5a M1a2 O10a . . . 90.71(14) ?  
O5a M1a2 O11a . . . 90.37(15) ?  
O5a M1a2 O12a . . . 90.98(15) ?  
O9a M1a2 O10a . . . 85.81(14) ?  
O9a M1a2 O11a . . . 178.91(15) ?  
O9a M1a2 O12a . . . 90.85(15) ?  
O10a M1a2 O11a . . . 95.07(14) ?  
O10a M1a2 O12a . . . 176.23(15) ?  
O11a M1a2 O12a . . . 88.28(14) ?  
M1b1 M1b2 P2b . . . 0 ?  
M1b1 M1b2 P1a . . 1\_544 0 ?  
M1b1 M1b2 A1b . . 1\_545 0 ?  
M1b1 M1b2 A1b . . 4\_554 0 ?  
M1b1 M1b2 A2b . . . 0 ?  
M1b1 M1b2 A2b . . 4\_544 0 ?  
M1b1 M1b2 O1a . . 1\_544 0 ?  
M1b1 M1b2 O5b . . . 0 ?  
M1b1 M1b2 O9b . . . 0 ?  
M1b1 M1b2 O10b . . . 0 ?  
M1b1 M1b2 O11b . . . 0 ?  
M1b1 M1b2 O12b . . . 0 ?  
P2b M1b2 P1a . . 1\_544 178.19(5) ?  
P2b M1b2 A1b . . 1\_545 85.88(5) ?

P2b M1b2 A1b . . 4\_544 123.28(5) ?  
 P2b M1b2 A2b . . . 117.32(4) ?  
 P2b M1b2 A2b . . 4\_544 47.88(3) ?  
 P2b M1b2 O1a . . 1\_544 166.25(11) ?  
 P2b M1b2 O5b . . . 15.67(10) ?  
 P2b M1b2 O9b . . . 74.62(12) ?  
 P2b M1b2 O10b . . . 90.53(11) ?  
 P2b M1b2 O11b . . . 106.02(12) ?  
 P2b M1b2 O12b . . . 89.47(11) ?  
 P1a M1b2 A1b 1\_544 . 1\_545 95.81(5) ?  
 P1a M1b2 A1b 1\_544 . 4\_544 55.73(5) ?  
 P1a M1b2 A2b 1\_544 . . 63.15(4) ?  
 P1a M1b2 A2b 1\_544 . 4\_544 130.32(4) ?  
 P1a M1b2 O1a 1\_544 . 1\_544 15.11(10) ?  
 P1a M1b2 O5b 1\_544 . . 163.07(11) ?  
 P1a M1b2 O9b 1\_544 . . 106.65(12) ?  
 P1a M1b2 O10b 1\_544 . . 90.83(11) ?  
 P1a M1b2 O11b 1\_544 . . 72.73(11) ?  
 P1a M1b2 O12b 1\_544 . . 89.19(11) ?  
 A1b M1b2 A1b 1\_545 . 4\_544 102.32(6) ?  
 A1b M1b2 A2b 1\_545 . . 98.03(5) ?  
 A1b M1b2 A2b 1\_545 . 4\_544 132.00(5) ?  
 A1b M1b2 O1a 1\_545 . 1\_544 81.39(11) ?  
 A1b M1b2 O5b 1\_545 . . 99.89(11) ?  
 A1b M1b2 O9b 1\_545 . . 25.77(11) ?  
 A1b M1b2 O10b 1\_545 . . 62.94(11) ?  
 A1b M1b2 O11b 1\_545 . . 152.92(11) ?  
 A1b M1b2 O12b 1\_545 . . 116.05(11) ?  
 A1b M1b2 A2b 4\_544 . . 116.78(6) ?  
 A1b M1b2 A2b 4\_544 . 4\_544 95.40(5) ?  
 A1b M1b2 O1a 4\_544 . 1\_544 55.41(11) ?  
 A1b M1b2 O5b 4\_544 . . 125.80(11) ?  
 A1b M1b2 O9b 4\_544 . . 89.11(12) ?  
 A1b M1b2 O10b 4\_544 . . 143.31(11) ?  
 A1b M1b2 O11b 4\_544 . . 91.46(12) ?  
 A1b M1b2 O12b 4\_544 . . 36.33(11) ?  
 A2b M1b2 A2b . . 4\_544 113.01(4) ?  
 A2b M1b2 O1a . . 1\_544 69.91(10) ?  
 A2b M1b2 O5b . . . 108.03(11) ?  
 A2b M1b2 O9b . . . 123.80(11) ?  
 A2b M1b2 O10b . . . 42.27(11) ?  
 A2b M1b2 O11b . . . 54.89(11) ?  
 A2b M1b2 O12b . . . 138.47(11) ?  
 A2b M1b2 O1a 4\_544 . 1\_544 142.52(11) ?  
 A2b M1b2 O5b 4\_544 . . 37.11(10) ?  
 A2b M1b2 O9b 4\_544 . . 112.81(12) ?  
 A2b M1b2 O10b 4\_544 . . 119.75(11) ?  
 A2b M1b2 O11b 4\_544 . . 68.31(11) ?  
 A2b M1b2 O12b 4\_544 . . 60.91(11) ?  
 O1a M1b2 O5b 1\_544 . . 177.77(15) ?  
 O1a M1b2 O9b 1\_544 . . 91.64(16) ?  
 O1a M1b2 O10b 1\_544 . . 88.28(14) ?  
 O1a M1b2 O11b 1\_544 . . 87.71(15) ?  
 O1a M1b2 O12b 1\_544 . . 91.48(15) ?

05b M1b2 09b . . . 90.27(16) ?  
 05b M1b2 010b . . . 90.67(14) ?  
 05b M1b2 011b . . . 90.36(15) ?  
 05b M1b2 012b . . . 89.60(15) ?  
 09b M1b2 010b . . . 86.66(15) ?  
 09b M1b2 011b . . . 178.69(16) ?  
 09b M1b2 012b . . . 92.36(15) ?  
 010b M1b2 011b . . . 92.18(15) ?  
 010b M1b2 012b . . . 178.99(15) ?  
 011b M1b2 012b . . . 88.80(15) ?  
 M2a2 M2a1 M2a3 . . . 0 ?  
 M2a2 M2a1 M3a1 . . . 0 ?  
 M2a2 M2a1 M3a2 . . . 0 ?  
 M2a2 M2a1 P2a . . 3\_666 0 ?  
 M2a2 M2a1 P2b . . 2\_755 0 ?  
 M2a2 M2a1 P1a . . . 0 ?  
 M2a2 M2a1 P1b . . 4\_456 0 ?  
 M2a2 M2a1 A1b . . 4\_565 0 ?  
 M2a2 M2a1 A2b . . 3\_756 0 ?  
 M2a2 M2a1 X1 . . . 0 ?  
 M2a2 M2a1 O2b . . 4\_456 0 ?  
 M2a2 M2a1 O4a . . . 0 ?  
 M2a2 M2a1 O6a . . 3\_666 0 ?  
 M2a2 M2a1 O8b . . 2\_755 0 ?  
 M2a2 M2a1 O13a . . . 0 ?  
 M2a3 M2a1 M3a1 . . . 0 ?  
 M2a3 M2a1 M3a2 . . . 0 ?  
 M2a3 M2a1 P2a . . 3\_666 0 ?  
 M2a3 M2a1 P2b . . 2\_755 0 ?  
 M2a3 M2a1 P1a . . . 0 ?  
 M2a3 M2a1 P1b . . 4\_456 0 ?  
 M2a3 M2a1 A1b . . 4\_565 0 ?  
 M2a3 M2a1 A2b . . 3\_756 0 ?  
 M2a3 M2a1 X1 . . . 0 ?  
 M2a3 M2a1 O2b . . 4\_456 0 ?  
 M2a3 M2a1 O4a . . . 0 ?  
 M2a3 M2a1 O6a . . 3\_666 0 ?  
 M2a3 M2a1 O8b . . 2\_755 0 ?  
 M2a3 M2a1 O13a . . . 0 ?  
 M3a1 M2a1 M3a2 . . . 0 ?  
 M3a1 M2a1 P2a . . 3\_666 58.23(3) ?  
 M3a1 M2a1 P2b . . 2\_755 122.30(4) ?  
 M3a1 M2a1 P1a . . . 124.35(4) ?  
 M3a1 M2a1 P1b . . 4\_456 57.64(3) ?  
 M3a1 M2a1 A1b . . 4\_565 63.65(5) ?  
 M3a1 M2a1 A2b . . 3\_756 140.77(3) ?  
 M3a1 M2a1 X1 . . . 22.94(12) ?  
 M3a1 M2a1 O2b . . 4\_456 75.45(10) ?  
 M3a1 M2a1 O4a . . . 108.40(10) ?  
 M3a1 M2a1 O6a . . 3\_666 76.10(10) ?  
 M3a1 M2a1 O8b . . 2\_755 107.49(10) ?  
 M3a1 M2a1 O13a . . . 151.92(12) ?  
 M3a2 M2a1 P2a . . 3\_666 58.23(3) ?  
 M3a2 M2a1 P2b . . 2\_755 122.30(4) ?



M3a2 M2a1 P1a . . . 124.35(4) ?  
M3a2 M2a1 P1b . . 4\_456 57.64(3) ?  
M3a2 M2a1 A1b . . 4\_565 63.65(5) ?  
M3a2 M2a1 A2b . . 3\_756 140.77(3) ?  
M3a2 M2a1 X1 . . . 22.94(12) ?  
M3a2 M2a1 O2b . . 4\_456 75.45(10) ?  
M3a2 M2a1 O4a . . . 108.40(10) ?  
M3a2 M2a1 O6a . . 3\_666 76.10(10) ?  
M3a2 M2a1 O8b . . 2\_755 107.49(10) ?  
M3a2 M2a1 O13a . . . 151.92(12) ?  
P2a M2a1 P2b 3\_666 . 2\_755 108.58(4) ?  
P2a M2a1 P1a 3\_666 . . 177.27(5) ?  
P2a M2a1 P1b 3\_666 . 4\_456 71.27(4) ?  
P2a M2a1 A1b 3\_666 . 4\_565 119.31(6) ?  
P2a M2a1 A2b 3\_666 . 3\_756 87.39(4) ?  
P2a M2a1 X1 3\_666 . . 76.42(12) ?  
P2a M2a1 O2b 3\_666 . 4\_456 82.65(11) ?  
P2a M2a1 O4a 3\_666 . . 165.16(11) ?  
P2a M2a1 O6a 3\_666 . 3\_666 18.43(10) ?  
P2a M2a1 O8b 3\_666 . 2\_755 98.56(11) ?  
P2a M2a1 O13a 3\_666 . . 99.84(11) ?  
P2b M2a1 P1a 2\_755 . . 71.03(4) ?  
P2b M2a1 P1b 2\_755 . 4\_456 179.85(4) ?  
P2b M2a1 A1b 2\_755 . 4\_565 115.93(6) ?  
P2b M2a1 A2b 2\_755 . 3\_756 47.36(4) ?  
P2b M2a1 X1 2\_755 . . 105.27(12) ?  
P2b M2a1 O2b 2\_755 . 4\_456 162.00(10) ?  
P2b M2a1 O4a 2\_755 . . 83.66(11) ?  
P2b M2a1 O6a 2\_755 . 3\_666 95.75(11) ?  
P2b M2a1 O8b 2\_755 . 2\_755 15.17(10) ?  
P2b M2a1 O13a 2\_755 . . 79.27(11) ?  
P1a M2a1 P1b . . 4\_456 109.12(4) ?  
P1a M2a1 A1b . . 4\_565 62.87(6) ?  
P1a M2a1 A2b . . 3\_756 90.47(4) ?  
P1a M2a1 X1 . . . 106.31(12) ?  
P1a M2a1 O2b . . 4\_456 97.06(11) ?  
P1a M2a1 O4a . . . 16.86(10) ?  
P1a M2a1 O6a . . 3\_666 159.24(11) ?  
P1a M2a1 O8b . . 2\_755 81.60(11) ?  
P1a M2a1 O13a . . . 77.43(11) ?  
P1b M2a1 A1b 4\_456 . 4\_565 64.18(6) ?  
P1b M2a1 A2b 4\_456 . 3\_756 132.57(4) ?  
P1b M2a1 X1 4\_456 . . 74.72(12) ?  
P1b M2a1 O2b 4\_456 . 4\_456 18.09(10) ?  
P1b M2a1 O4a 4\_456 . . 96.49(11) ?  
P1b M2a1 O6a 4\_456 . 3\_666 84.10(11) ?  
P1b M2a1 O8b 4\_456 . 2\_755 164.74(11) ?  
P1b M2a1 O13a 4\_456 . . 100.74(11) ?  
A1b M2a1 A2b 4\_565 . 3\_756 153.28(5) ?  
A1b M2a1 X1 4\_565 . . 54.05(11) ?  
A1b M2a1 O2b 4\_565 . 4\_456 67.16(11) ?  
A1b M2a1 O4a 4\_565 . . 46.04(11) ?  
A1b M2a1 O6a 4\_565 . 3\_666 137.70(11) ?  
A1b M2a1 O8b 4\_565 . 2\_755 114.28(12) ?

A1b M2a1 O13a 4\_565 . . 126.54(11) ?  
A2b M2a1 X1 3\_756 . . 141.57(10) ?  
A2b M2a1 O2b 3\_756 . 4\_456 121.75(10) ?  
A2b M2a1 O4a 3\_756 . . 107.32(10) ?  
A2b M2a1 O6a 3\_756 . 3\_666 69.01(10) ?  
A2b M2a1 O8b 3\_756 . 2\_755 55.75(10) ?  
A2b M2a1 O13a 3\_756 . . 40.64(10) ?  
X1 M2a1 O2b . . 4\_456 90.84(15) ?  
X1 M2a1 O4a . . . 92.51(15) ?  
X1 M2a1 O6a . . 3\_666 92.40(15) ?  
X1 M2a1 O8b . . 2\_755 92.07(15) ?  
X1 M2a1 O13a . . . 174.80(17) ?  
O2b M2a1 O4a 4\_456 . . 87.72(15) ?  
O2b M2a1 O6a 4\_456 . 3\_666 91.47(15) ?  
O2b M2a1 O8b 4\_456 . 2\_755 177.03(14) ?  
O2b M2a1 O13a 4\_456 . . 85.04(14) ?  
O4a M2a1 O6a . . 3\_666 175.03(14) ?  
O4a M2a1 O8b . . 2\_755 91.61(15) ?  
O4a M2a1 O13a . . . 90.51(14) ?  
O6a M2a1 O8b 3\_666 . 2\_755 88.95(15) ?  
O6a M2a1 O13a 3\_666 . . 84.54(14) ?  
O8b M2a1 O13a 2\_755 . . 92.07(14) ?  
M2a1 M2a2 M2a3 . . . 0 ?  
M2a1 M2a2 M3a1 . . . 0 ?  
M2a1 M2a2 M3a2 . . . 0 ?  
M2a1 M2a2 P2a . . 3\_666 0 ?  
M2a1 M2a2 P2b . . 2\_755 0 ?  
M2a1 M2a2 P1a . . . 0 ?  
M2a1 M2a2 P1b . . 4\_456 0 ?  
M2a1 M2a2 A1b . . 4\_565 0 ?  
M2a1 M2a2 A2b . . 3\_756 0 ?  
M2a1 M2a2 X1 . . . 0 ?  
M2a1 M2a2 O2b . . 4\_456 0 ?  
M2a1 M2a2 O4a . . . 0 ?  
M2a1 M2a2 O6a . . 3\_666 0 ?  
M2a1 M2a2 O8b . . 2\_755 0 ?  
M2a1 M2a2 O13a . . . 0 ?  
M2a3 M2a2 M3a1 . . . 0 ?  
M2a3 M2a2 M3a2 . . . 0 ?  
M2a3 M2a2 P2a . . 3\_666 0 ?  
M2a3 M2a2 P2b . . 2\_755 0 ?  
M2a3 M2a2 P1a . . . 0 ?  
M2a3 M2a2 P1b . . 4\_456 0 ?  
M2a3 M2a2 A1b . . 4\_565 0 ?  
M2a3 M2a2 A2b . . 3\_756 0 ?  
M2a3 M2a2 X1 . . . 0 ?  
M2a3 M2a2 O2b . . 4\_456 0 ?  
M2a3 M2a2 O4a . . . 0 ?  
M2a3 M2a2 O6a . . 3\_666 0 ?  
M2a3 M2a2 O8b . . 2\_755 0 ?  
M2a3 M2a2 O13a . . . 0 ?  
M3a1 M2a2 M3a2 . . . 0 ?  
M3a1 M2a2 P2a . . 3\_666 58.23(3) ?  
M3a1 M2a2 P2b . . 2\_755 122.30(4) ?

M3a1 M2a2 P1a . . . 124.35(4) ?  
M3a1 M2a2 P1b . . 4\_456 57.64(3) ?  
M3a1 M2a2 A1b . . 4\_565 63.65(5) ?  
M3a1 M2a2 A2b . . 3\_756 140.77(3) ?  
M3a1 M2a2 X1 . . . 22.94(12) ?  
M3a1 M2a2 O2b . . 4\_456 75.45(10) ?  
M3a1 M2a2 O4a . . . 108.40(10) ?  
M3a1 M2a2 O6a . . 3\_666 76.10(10) ?  
M3a1 M2a2 O8b . . 2\_755 107.49(10) ?  
M3a1 M2a2 O13a . . . 151.92(12) ?  
M3a2 M2a2 P2a . . 3\_666 58.23(3) ?  
M3a2 M2a2 P2b . . 2\_755 122.30(4) ?  
M3a2 M2a2 P1a . . . 124.35(4) ?  
M3a2 M2a2 P1b . . 4\_456 57.64(3) ?  
M3a2 M2a2 A1b . . 4\_565 63.65(5) ?  
M3a2 M2a2 A2b . . 3\_756 140.77(3) ?  
M3a2 M2a2 X1 . . . 22.94(12) ?  
M3a2 M2a2 O2b . . 4\_456 75.45(10) ?  
M3a2 M2a2 O4a . . . 108.40(10) ?  
M3a2 M2a2 O6a . . 3\_666 76.10(10) ?  
M3a2 M2a2 O8b . . 2\_755 107.49(10) ?  
M3a2 M2a2 O13a . . . 151.92(12) ?  
P2a M2a2 P2b 3\_666 . 2\_755 108.58(4) ?  
P2a M2a2 P1a 3\_666 . . 177.27(5) ?  
P2a M2a2 P1b 3\_666 . 4\_456 71.27(4) ?  
P2a M2a2 A1b 3\_666 . 4\_565 119.31(6) ?  
P2a M2a2 A2b 3\_666 . 3\_756 87.39(4) ?  
P2a M2a2 X1 3\_666 . . 76.42(12) ?  
P2a M2a2 O2b 3\_666 . 4\_456 82.65(11) ?  
P2a M2a2 O4a 3\_666 . . 165.16(11) ?  
P2a M2a2 O6a 3\_666 . 3\_666 18.43(10) ?  
P2a M2a2 O8b 3\_666 . 2\_755 98.56(11) ?  
P2a M2a2 O13a 3\_666 . . 99.84(11) ?  
P2b M2a2 P1a 2\_755 . . 71.03(4) ?  
P2b M2a2 P1b 2\_755 . 4\_456 179.85(4) ?  
P2b M2a2 A1b 2\_755 . 4\_565 115.93(6) ?  
P2b M2a2 A2b 2\_755 . 3\_756 47.36(4) ?  
P2b M2a2 X1 2\_755 . . 105.27(12) ?  
P2b M2a2 O2b 2\_755 . 4\_456 162.00(10) ?  
P2b M2a2 O4a 2\_755 . . 83.66(11) ?  
P2b M2a2 O6a 2\_755 . 3\_666 95.75(11) ?  
P2b M2a2 O8b 2\_755 . 2\_755 15.17(10) ?  
P2b M2a2 O13a 2\_755 . . 79.27(11) ?  
P1a M2a2 P1b . . 4\_456 109.12(4) ?  
P1a M2a2 A1b . . 4\_565 62.87(6) ?  
P1a M2a2 A2b . . 3\_756 90.47(4) ?  
P1a M2a2 X1 . . . 106.31(12) ?  
P1a M2a2 O2b . . 4\_456 97.06(11) ?  
P1a M2a2 O4a . . . 16.86(10) ?  
P1a M2a2 O6a . . 3\_666 159.24(11) ?  
P1a M2a2 O8b . . 2\_755 81.60(11) ?  
P1a M2a2 O13a . . . 77.43(11) ?  
P1b M2a2 A1b 4\_456 . 4\_565 64.18(6) ?  
P1b M2a2 A2b 4\_456 . 3\_756 132.57(4) ?

P1b M2a2 X1 4\_456 . . 74.72(12) ?  
 P1b M2a2 O2b 4\_456 . 4\_456 18.09(10) ?  
 P1b M2a2 O4a 4\_456 . . 96.49(11) ?  
 P1b M2a2 O6a 4\_456 . 3\_666 84.10(11) ?  
 P1b M2a2 O8b 4\_456 . 2\_755 164.74(11) ?  
 P1b M2a2 O13a 4\_456 . . 100.74(11) ?  
 A1b M2a2 A2b 4\_565 . 3\_756 153.28(5) ?  
 A1b M2a2 X1 4\_565 . . 54.05(11) ?  
 A1b M2a2 O2b 4\_565 . 4\_456 67.16(11) ?  
 A1b M2a2 O4a 4\_565 . . 46.04(11) ?  
 A1b M2a2 O6a 4\_565 . 3\_666 137.70(11) ?  
 A1b M2a2 O8b 4\_565 . 2\_755 114.28(12) ?  
 A1b M2a2 O13a 4\_565 . . 126.54(11) ?  
 A2b M2a2 X1 3\_756 . . 141.57(10) ?  
 A2b M2a2 O2b 3\_756 . 4\_456 121.75(10) ?  
 A2b M2a2 O4a 3\_756 . . 107.32(10) ?  
 A2b M2a2 O6a 3\_756 . 3\_666 69.01(10) ?  
 A2b M2a2 O8b 3\_756 . 2\_755 55.75(10) ?  
 A2b M2a2 O13a 3\_756 . . 40.64(10) ?  
 X1 M2a2 O2b . . 4\_456 90.84(15) ?  
 X1 M2a2 O4a . . . 92.51(15) ?  
 X1 M2a2 O6a . . 3\_666 92.40(15) ?  
 X1 M2a2 O8b . . 2\_755 92.07(15) ?  
 X1 M2a2 O13a . . . 174.80(17) ?  
 O2b M2a2 O4a 4\_456 . . 87.72(15) ?  
 O2b M2a2 O6a 4\_456 . 3\_666 91.47(15) ?  
 O2b M2a2 O8b 4\_456 . 2\_755 177.03(14) ?  
 O2b M2a2 O13a 4\_456 . . 85.04(14) ?  
 O4a M2a2 O6a . . 3\_666 175.03(14) ?  
 O4a M2a2 O8b . . 2\_755 91.61(15) ?  
 O4a M2a2 O13a . . . 90.51(14) ?  
 O6a M2a2 O8b 3\_666 . 2\_755 88.95(15) ?  
 O6a M2a2 O13a 3\_666 . . 84.54(14) ?  
 O8b M2a2 O13a 2\_755 . . 92.07(14) ?  
 M2a1 M2a3 M2a2 . . . 0 ?  
 M2a1 M2a3 M3a1 . . . 0 ?  
 M2a1 M2a3 M3a2 . . . 0 ?  
 M2a1 M2a3 P2a . . 3\_666 0 ?  
 M2a1 M2a3 P2b . . 2\_755 0 ?  
 M2a1 M2a3 P1a . . . 0 ?  
 M2a1 M2a3 P1b . . 4\_456 0 ?  
 M2a1 M2a3 A1b . . 4\_565 0 ?  
 M2a1 M2a3 A2b . . 3\_756 0 ?  
 M2a1 M2a3 X1 . . . 0 ?  
 M2a1 M2a3 O2b . . 4\_456 0 ?  
 M2a1 M2a3 O4a . . . 0 ?  
 M2a1 M2a3 O6a . . 3\_666 0 ?  
 M2a1 M2a3 O8b . . 2\_755 0 ?  
 M2a1 M2a3 O13a . . . 0 ?  
 M2a2 M2a3 M3a1 . . . 0 ?  
 M2a2 M2a3 M3a2 . . . 0 ?  
 M2a2 M2a3 P2a . . 3\_666 0 ?  
 M2a2 M2a3 P2b . . 2\_755 0 ?  
 M2a2 M2a3 P1a . . . 0 ?

M2a2 M2a3 P1b . . 4\_456 0 ?  
M2a2 M2a3 A1b . . 4\_565 0 ?  
M2a2 M2a3 A2b . . 3\_756 0 ?  
M2a2 M2a3 X1 . . . 0 ?  
M2a2 M2a3 O2b . . 4\_456 0 ?  
M2a2 M2a3 O4a . . . 0 ?  
M2a2 M2a3 O6a . . 3\_666 0 ?  
M2a2 M2a3 O8b . . 2\_755 0 ?  
M2a2 M2a3 O13a . . . 0 ?  
M3a1 M2a3 M3a2 . . . 0 ?  
M3a1 M2a3 P2a . . 3\_666 58.23(3) ?  
M3a1 M2a3 P2b . . 2\_755 122.30(4) ?  
M3a1 M2a3 P1a . . . 124.35(4) ?  
M3a1 M2a3 P1b . . 4\_456 57.64(3) ?  
M3a1 M2a3 A1b . . 4\_565 63.65(5) ?  
M3a1 M2a3 A2b . . 3\_756 140.77(3) ?  
M3a1 M2a3 X1 . . . 22.94(12) ?  
M3a1 M2a3 O2b . . 4\_456 75.45(10) ?  
M3a1 M2a3 O4a . . . 108.40(10) ?  
M3a1 M2a3 O6a . . 3\_666 76.10(10) ?  
M3a1 M2a3 O8b . . 2\_755 107.49(10) ?  
M3a1 M2a3 O13a . . . 151.92(12) ?  
M3a2 M2a3 P2a . . 3\_666 58.23(3) ?  
M3a2 M2a3 P2b . . 2\_755 122.30(4) ?  
M3a2 M2a3 P1a . . . 124.35(4) ?  
M3a2 M2a3 P1b . . 4\_456 57.64(3) ?  
M3a2 M2a3 A1b . . 4\_565 63.65(5) ?  
M3a2 M2a3 A2b . . 3\_756 140.77(3) ?  
M3a2 M2a3 X1 . . . 22.94(12) ?  
M3a2 M2a3 O2b . . 4\_456 75.45(10) ?  
M3a2 M2a3 O4a . . . 108.40(10) ?  
M3a2 M2a3 O6a . . 3\_666 76.10(10) ?  
M3a2 M2a3 O8b . . 2\_755 107.49(10) ?  
M3a2 M2a3 O13a . . . 151.92(12) ?  
P2a M2a3 P2b 3\_666 . 2\_755 108.58(4) ?  
P2a M2a3 P1a 3\_666 . . 177.27(5) ?  
P2a M2a3 P1b 3\_666 . 4\_456 71.27(4) ?  
P2a M2a3 A1b 3\_666 . 4\_565 119.31(6) ?  
P2a M2a3 A2b 3\_666 . 3\_756 87.39(4) ?  
P2a M2a3 X1 3\_666 . . 76.42(12) ?  
P2a M2a3 O2b 3\_666 . 4\_456 82.65(11) ?  
P2a M2a3 O4a 3\_666 . . 165.16(11) ?  
P2a M2a3 O6a 3\_666 . 3\_666 18.43(10) ?  
P2a M2a3 O8b 3\_666 . 2\_755 98.56(11) ?  
P2a M2a3 O13a 3\_666 . . 99.84(11) ?  
P2b M2a3 P1a 2\_755 . . 71.03(4) ?  
P2b M2a3 P1b 2\_755 . 4\_456 179.85(4) ?  
P2b M2a3 A1b 2\_755 . 4\_565 115.93(6) ?  
P2b M2a3 A2b 2\_755 . 3\_756 47.36(4) ?  
P2b M2a3 X1 2\_755 . . 105.27(12) ?  
P2b M2a3 O2b 2\_755 . 4\_456 162.00(10) ?  
P2b M2a3 O4a 2\_755 . . 83.66(11) ?  
P2b M2a3 O6a 2\_755 . 3\_666 95.75(11) ?  
P2b M2a3 O8b 2\_755 . 2\_755 15.17(10) ?

P2b M2a3 O13a 2\_755 . . 79.27(11) ?  
 P1a M2a3 P1b . . 4\_456 109.12(4) ?  
 P1a M2a3 A1b . . 4\_565 62.87(6) ?  
 P1a M2a3 A2b . . 3\_756 90.47(4) ?  
 P1a M2a3 X1 . . . 106.31(12) ?  
 P1a M2a3 O2b . . 4\_456 97.06(11) ?  
 P1a M2a3 O4a . . . 16.86(10) ?  
 P1a M2a3 O6a . . 3\_666 159.24(11) ?  
 P1a M2a3 O8b . . 2\_755 81.60(11) ?  
 P1a M2a3 O13a . . . 77.43(11) ?  
 P1b M2a3 A1b 4\_456 . 4\_565 64.18(6) ?  
 P1b M2a3 A2b 4\_456 . 3\_756 132.57(4) ?  
 P1b M2a3 X1 4\_456 . . 74.72(12) ?  
 P1b M2a3 O2b 4\_456 . 4\_456 18.09(10) ?  
 P1b M2a3 O4a 4\_456 . . 96.49(11) ?  
 P1b M2a3 O6a 4\_456 . 3\_666 84.10(11) ?  
 P1b M2a3 O8b 4\_456 . 2\_755 164.74(11) ?  
 P1b M2a3 O13a 4\_456 . . 100.74(11) ?  
 A1b M2a3 A2b 4\_565 . 3\_756 153.28(5) ?  
 A1b M2a3 X1 4\_565 . . 54.05(11) ?  
 A1b M2a3 O2b 4\_565 . 4\_456 67.16(11) ?  
 A1b M2a3 O4a 4\_565 . . 46.04(11) ?  
 A1b M2a3 O6a 4\_565 . 3\_666 137.70(11) ?  
 A1b M2a3 O8b 4\_565 . 2\_755 114.28(12) ?  
 A1b M2a3 O13a 4\_565 . . 126.54(11) ?  
 A2b M2a3 X1 3\_756 . . 141.57(10) ?  
 A2b M2a3 O2b 3\_756 . 4\_456 121.75(10) ?  
 A2b M2a3 O4a 3\_756 . . 107.32(10) ?  
 A2b M2a3 O6a 3\_756 . 3\_666 69.01(10) ?  
 A2b M2a3 O8b 3\_756 . 2\_755 55.75(10) ?  
 A2b M2a3 O13a 3\_756 . . 40.64(10) ?  
 X1 M2a3 O2b . . 4\_456 90.84(15) ?  
 X1 M2a3 O4a . . . 92.51(15) ?  
 X1 M2a3 O6a . . 3\_666 92.40(15) ?  
 X1 M2a3 O8b . . 2\_755 92.07(15) ?  
 X1 M2a3 O13a . . . 174.80(17) ?  
 O2b M2a3 O4a 4\_456 . . 87.72(15) ?  
 O2b M2a3 O6a 4\_456 . 3\_666 91.47(15) ?  
 O2b M2a3 O8b 4\_456 . 2\_755 177.03(14) ?  
 O2b M2a3 O13a 4\_456 . . 85.04(14) ?  
 O4a M2a3 O6a . . 3\_666 175.03(14) ?  
 O4a M2a3 O8b . . 2\_755 91.61(15) ?  
 O4a M2a3 O13a . . . 90.51(14) ?  
 O6a M2a3 O8b 3\_666 . 2\_755 88.95(15) ?  
 O6a M2a3 O13a 3\_666 . . 84.54(14) ?  
 O8b M2a3 O13a 2\_755 . . 92.07(14) ?  
 M2b2 M2b1 M2b3 . . . 0 ?  
 M2b2 M2b1 M3b1 . . . 0 ?  
 M2b2 M2b1 M3b2 . . . 0 ?  
 M2b2 M2b1 P2a . . 2\_744 0 ?  
 M2b2 M2b1 P2b . . 3\_754 0 ?  
 M2b2 M2b1 P1a . . 4\_553 0 ?  
 M2b2 M2b1 P1b . . . 0 ?  
 M2b2 M2b1 A1b . . 3\_764 0 ?

M2b2 M2b1 A2b . . 4\_544 0 ?  
M2b2 M2b1 X2 . . . 0 ?  
M2b2 M2b1 O2a . . 4\_553 0 ?  
M2b2 M2b1 O4b . . . 0 ?  
M2b2 M2b1 O6b . . 3\_754 0 ?  
M2b2 M2b1 O8a . . 2\_744 0 ?  
M2b2 M2b1 O13b . . . 0 ?  
M2b3 M2b1 M3b1 . . . 0 ?  
M2b3 M2b1 M3b2 . . . 0 ?  
M2b3 M2b1 P2a . . 2\_744 0 ?  
M2b3 M2b1 P2b . . 3\_754 0 ?  
M2b3 M2b1 P1a . . 4\_553 0 ?  
M2b3 M2b1 P1b . . . 0 ?  
M2b3 M2b1 A1b . . 3\_764 0 ?  
M2b3 M2b1 A2b . . 4\_544 0 ?  
M2b3 M2b1 X2 . . . 0 ?  
M2b3 M2b1 O2a . . 4\_553 0 ?  
M2b3 M2b1 O4b . . . 0 ?  
M2b3 M2b1 O6b . . 3\_754 0 ?  
M2b3 M2b1 O8a . . 2\_744 0 ?  
M2b3 M2b1 O13b . . . 0 ?  
M3b1 M2b1 M3b2 . . . 0 ?  
M3b1 M2b1 P2a . . 2\_744 123.23(4) ?  
M3b1 M2b1 P2b . . 3\_754 58.12(3) ?  
M3b1 M2b1 P1a . . 4\_553 57.96(3) ?  
M3b1 M2b1 P1b . . . 125.66(4) ?  
M3b1 M2b1 A1b . . 3\_764 141.36(4) ?  
M3b1 M2b1 A2b . . 4\_544 64.20(3) ?  
M3b1 M2b1 X2 . . . 22.84(12) ?  
M3b1 M2b1 O2a . . 4\_553 75.94(10) ?  
M3b1 M2b1 O4b . . . 111.29(10) ?  
M3b1 M2b1 O6b . . 3\_754 76.40(10) ?  
M3b1 M2b1 O8a . . 2\_744 108.47(10) ?  
M3b1 M2b1 O13b . . . 151.19(12) ?  
M3b2 M2b1 P2a . . 2\_744 123.23(4) ?  
M3b2 M2b1 P2b . . 3\_754 58.12(3) ?  
M3b2 M2b1 P1a . . 4\_553 57.96(3) ?  
M3b2 M2b1 P1b . . . 125.66(4) ?  
M3b2 M2b1 A1b . . 3\_764 141.36(4) ?  
M3b2 M2b1 A2b . . 4\_544 64.20(3) ?  
M3b2 M2b1 X2 . . . 22.84(12) ?  
M3b2 M2b1 O2a . . 4\_553 75.94(10) ?  
M3b2 M2b1 O4b . . . 111.29(10) ?  
M3b2 M2b1 O6b . . 3\_754 76.40(10) ?  
M3b2 M2b1 O8a . . 2\_744 108.47(10) ?  
M3b2 M2b1 O13b . . . 151.19(12) ?  
P2a M2b1 P2b 2\_744 . 3\_754 108.85(4) ?  
P2a M2b1 P1a 2\_744 . 4\_553 178.72(5) ?  
P2a M2b1 P1b 2\_744 . . 70.30(4) ?  
P2a M2b1 A1b 2\_744 . 3\_764 46.39(5) ?  
P2a M2b1 A2b 2\_744 . 4\_544 115.34(4) ?  
P2a M2b1 X2 2\_744 . . 106.65(12) ?  
P2a M2b1 O2a 2\_744 . 4\_553 160.60(10) ?  
P2a M2b1 O4b 2\_744 . . 82.19(11) ?

P2a M2b1 O6b 2\_744 . 3\_754 95.44(11) ?  
 P2a M2b1 O8a 2\_744 . 2\_744 15.08(10) ?  
 P2a M2b1 O13b 2\_744 . . 77.88(11) ?  
 P2b M2b1 P1a 3\_754 . 4\_553 71.28(4) ?  
 P2b M2b1 P1b 3\_754 . . 176.09(5) ?  
 P2b M2b1 A1b 3\_754 . 3\_764 88.09(5) ?  
 P2b M2b1 A2b 3\_754 . 4\_544 120.01(4) ?  
 P2b M2b1 X2 3\_754 . . 76.53(12) ?  
 P2b M2b1 O2a 3\_754 . 4\_553 83.07(10) ?  
 P2b M2b1 O4b 3\_754 . . 167.54(11) ?  
 P2b M2b1 O6b 3\_754 . 3\_754 18.87(10) ?  
 P2b M2b1 O8a 3\_754 . 2\_744 99.01(11) ?  
 P2b M2b1 O13b 3\_754 . . 98.42(11) ?  
 P1a M2b1 P1b 4\_553 . . 109.49(4) ?  
 P1a M2b1 A1b 4\_553 . 3\_764 132.47(5) ?  
 P1a M2b1 A2b 4\_553 . 4\_544 65.42(4) ?  
 P1a M2b1 X2 4\_553 . . 74.63(12) ?  
 P1a M2b1 O2a 4\_553 . 4\_553 18.30(10) ?  
 P1a M2b1 O4b 4\_553 . . 97.82(11) ?  
 P1a M2b1 O6b 4\_553 . 3\_754 84.37(11) ?  
 P1a M2b1 O8a 4\_553 . 2\_744 165.96(11) ?  
 P1a M2b1 O13b 4\_553 . . 100.84(11) ?  
 P1b M2b1 A1b . . 3\_764 88.68(5) ?  
 P1b M2b1 A2b . . 4\_544 63.31(4) ?  
 P1b M2b1 X2 . . . 107.38(12) ?  
 P1b M2b1 O2a . . 4\_553 96.75(10) ?  
 P1b M2b1 O4b . . . 15.34(10) ?  
 P1b M2b1 O6b . . 3\_754 157.66(11) ?  
 P1b M2b1 O8a . . 2\_744 80.90(11) ?  
 P1b M2b1 O13b . . . 77.67(11) ?  
 A1b M2b1 A2b 3\_764 . 4\_544 151.85(5) ?  
 A1b M2b1 X2 3\_764 . . 142.48(11) ?  
 A1b M2b1 O2a 3\_764 . 4\_553 121.49(10) ?  
 A1b M2b1 O4b 3\_764 . . 104.00(11) ?  
 A1b M2b1 O6b 3\_764 . 3\_754 69.28(11) ?  
 A1b M2b1 O8a 3\_764 . 2\_744 54.93(11) ?  
 A1b M2b1 O13b 3\_764 . . 39.05(10) ?  
 A2b M2b1 X2 4\_544 . . 53.71(10) ?  
 A2b M2b1 O2a 4\_544 . 4\_553 68.10(10) ?  
 A2b M2b1 O4b 4\_544 . . 48.06(10) ?  
 A2b M2b1 O6b 4\_544 . 3\_754 138.86(11) ?  
 A2b M2b1 O8a 4\_544 . 2\_744 113.72(11) ?  
 A2b M2b1 O13b 4\_544 . . 128.30(10) ?  
 X2 M2b1 O2a . . 4\_553 90.77(15) ?  
 X2 M2b1 O4b . . . 95.04(15) ?  
 X2 M2b1 O6b . . 3\_754 92.94(15) ?  
 X2 M2b1 O8a . . 2\_744 93.50(15) ?  
 X2 M2b1 O13b . . . 174.03(17) ?  
 O2a M2b1 O4b 4\_553 . . 87.95(15) ?  
 O2a M2b1 O6b 4\_553 . 3\_754 92.03(15) ?  
 O2a M2b1 O8a 4\_553 . 2\_744 175.58(14) ?  
 O2a M2b1 O13b 4\_553 . . 85.39(14) ?  
 O4b M2b1 O6b . . 3\_754 172.02(14) ?  
 O4b M2b1 O8a . . 2\_744 90.55(15) ?



O4b M2b1 O13b . . . 89.41(14) ?  
 O6b M2b1 O8a 3\_754 . 2\_744 88.87(15) ?  
 O6b M2b1 O13b 3\_754 . . 82.63(14) ?  
 O8a M2b1 O13b 2\_744 . . 90.44(14) ?  
 M2b1 M2b2 M2b3 . . . 0 ?  
 M2b1 M2b2 M3b1 . . . 0 ?  
 M2b1 M2b2 M3b2 . . . 0 ?  
 M2b1 M2b2 P2a . . 2\_744 0 ?  
 M2b1 M2b2 P2b . . 3\_754 0 ?  
 M2b1 M2b2 P1a . . 4\_553 0 ?  
 M2b1 M2b2 P1b . . . 0 ?  
 M2b1 M2b2 A1b . . 3\_764 0 ?  
 M2b1 M2b2 A2b . . 4\_544 0 ?  
 M2b1 M2b2 X2 . . . 0 ?  
 M2b1 M2b2 O2a . . 4\_553 0 ?  
 M2b1 M2b2 O4b . . . 0 ?  
 M2b1 M2b2 O6b . . 3\_754 0 ?  
 M2b1 M2b2 O8a . . 2\_744 0 ?  
 M2b1 M2b2 O13b . . . 0 ?  
 M2b3 M2b2 M3b1 . . . 0 ?  
 M2b3 M2b2 M3b2 . . . 0 ?  
 M2b3 M2b2 P2a . . 2\_744 0 ?  
 M2b3 M2b2 P2b . . 3\_754 0 ?  
 M2b3 M2b2 P1a . . 4\_553 0 ?  
 M2b3 M2b2 P1b . . . 0 ?  
 M2b3 M2b2 A1b . . 3\_764 0 ?  
 M2b3 M2b2 A2b . . 4\_544 0 ?  
 M2b3 M2b2 X2 . . . 0 ?  
 M2b3 M2b2 O2a . . 4\_553 0 ?  
 M2b3 M2b2 O4b . . . 0 ?  
 M2b3 M2b2 O6b . . 3\_754 0 ?  
 M2b3 M2b2 O8a . . 2\_744 0 ?  
 M2b3 M2b2 O13b . . . 0 ?  
 M3b1 M2b2 M3b2 . . . 0 ?  
 M3b1 M2b2 P2a . . 2\_744 123.23(4) ?  
 M3b1 M2b2 P2b . . 3\_754 58.12(3) ?  
 M3b1 M2b2 P1a . . 4\_553 57.96(3) ?  
 M3b1 M2b2 P1b . . . 125.66(4) ?  
 M3b1 M2b2 A1b . . 3\_764 141.36(4) ?  
 M3b1 M2b2 A2b . . 4\_544 64.20(3) ?  
 M3b1 M2b2 X2 . . . 22.84(12) ?  
 M3b1 M2b2 O2a . . 4\_553 75.94(10) ?  
 M3b1 M2b2 O4b . . . 111.29(10) ?  
 M3b1 M2b2 O6b . . 3\_754 76.40(10) ?  
 M3b1 M2b2 O8a . . 2\_744 108.47(10) ?  
 M3b1 M2b2 O13b . . . 151.19(12) ?  
 M3b2 M2b2 P2a . . 2\_744 123.23(4) ?  
 M3b2 M2b2 P2b . . 3\_754 58.12(3) ?  
 M3b2 M2b2 P1a . . 4\_553 57.96(3) ?  
 M3b2 M2b2 P1b . . . 125.66(4) ?  
 M3b2 M2b2 A1b . . 3\_764 141.36(4) ?  
 M3b2 M2b2 A2b . . 4\_544 64.20(3) ?  
 M3b2 M2b2 X2 . . . 22.84(12) ?  
 M3b2 M2b2 O2a . . 4\_553 75.94(10) ?

M3b2 M2b2 O4b . . . 111.29(10) ?  
M3b2 M2b2 O6b . . 3\_754 76.40(10) ?  
M3b2 M2b2 O8a . . 2\_744 108.47(10) ?  
M3b2 M2b2 O13b . . . 151.19(12) ?  
P2a M2b2 P2b 2\_744 . 3\_754 108.85(4) ?  
P2a M2b2 P1a 2\_744 . 4\_553 178.72(5) ?  
P2a M2b2 P1b 2\_744 . . 70.30(4) ?  
P2a M2b2 A1b 2\_744 . 3\_764 46.39(5) ?  
P2a M2b2 A2b 2\_744 . 4\_544 115.34(4) ?  
P2a M2b2 X2 2\_744 . . 106.65(12) ?  
P2a M2b2 O2a 2\_744 . 4\_553 160.60(10) ?  
P2a M2b2 O4b 2\_744 . . 82.19(11) ?  
P2a M2b2 O6b 2\_744 . 3\_754 95.44(11) ?  
P2a M2b2 O8a 2\_744 . 2\_744 15.08(10) ?  
P2a M2b2 O13b 2\_744 . . 77.88(11) ?  
P2b M2b2 P1a 3\_754 . 4\_553 71.28(4) ?  
P2b M2b2 P1b 3\_754 . . 176.09(5) ?  
P2b M2b2 A1b 3\_754 . 3\_764 88.09(5) ?  
P2b M2b2 A2b 3\_754 . 4\_544 120.01(4) ?  
P2b M2b2 X2 3\_754 . . 76.53(12) ?  
P2b M2b2 O2a 3\_754 . 4\_553 83.07(10) ?  
P2b M2b2 O4b 3\_754 . . 167.54(11) ?  
P2b M2b2 O6b 3\_754 . 3\_754 18.87(10) ?  
P2b M2b2 O8a 3\_754 . 2\_744 99.01(11) ?  
P2b M2b2 O13b 3\_754 . . 98.42(11) ?  
P1a M2b2 P1b 4\_553 . . 109.49(4) ?  
P1a M2b2 A1b 4\_553 . 3\_764 132.47(5) ?  
P1a M2b2 A2b 4\_553 . 4\_544 65.42(4) ?  
P1a M2b2 X2 4\_553 . . 74.63(12) ?  
P1a M2b2 O2a 4\_553 . 4\_553 18.30(10) ?  
P1a M2b2 O4b 4\_553 . . 97.82(11) ?  
P1a M2b2 O6b 4\_553 . 3\_754 84.37(11) ?  
P1a M2b2 O8a 4\_553 . 2\_744 165.96(11) ?  
P1a M2b2 O13b 4\_553 . . 100.84(11) ?  
P1b M2b2 A1b . . 3\_764 88.68(5) ?  
P1b M2b2 A2b . . 4\_544 63.31(4) ?  
P1b M2b2 X2 . . . 107.38(12) ?  
P1b M2b2 O2a . . 4\_553 96.75(10) ?  
P1b M2b2 O4b . . . 15.34(10) ?  
P1b M2b2 O6b . . 3\_754 157.66(11) ?  
P1b M2b2 O8a . . 2\_744 80.90(11) ?  
P1b M2b2 O13b . . . 77.67(11) ?  
A1b M2b2 A2b 3\_764 . 4\_544 151.85(5) ?  
A1b M2b2 X2 3\_764 . . 142.48(11) ?  
A1b M2b2 O2a 3\_764 . 4\_553 121.49(10) ?  
A1b M2b2 O4b 3\_764 . . 104.00(11) ?  
A1b M2b2 O6b 3\_764 . 3\_754 69.28(11) ?  
A1b M2b2 O8a 3\_764 . 2\_744 54.93(11) ?  
A1b M2b2 O13b 3\_764 . . 39.05(10) ?  
A2b M2b2 X2 4\_544 . . 53.71(10) ?  
A2b M2b2 O2a 4\_544 . 4\_553 68.10(10) ?  
A2b M2b2 O4b 4\_544 . . 48.06(10) ?  
A2b M2b2 O6b 4\_544 . 3\_754 138.86(11) ?  
A2b M2b2 O8a 4\_544 . 2\_744 113.72(11) ?

A2b M2b2 O13b 4\_544 . . 128.30(10) ?  
X2 M2b2 O2a . . 4\_553 90.77(15) ?  
X2 M2b2 O4b . . . 95.04(15) ?  
X2 M2b2 O6b . . 3\_754 92.94(15) ?  
X2 M2b2 O8a . . 2\_744 93.50(15) ?  
X2 M2b2 O13b . . . 174.03(17) ?  
O2a M2b2 O4b 4\_553 . . 87.95(15) ?  
O2a M2b2 O6b 4\_553 . 3\_754 92.03(15) ?  
O2a M2b2 O8a 4\_553 . 2\_744 175.58(14) ?  
O2a M2b2 O13b 4\_553 . . 85.39(14) ?  
O4b M2b2 O6b . . 3\_754 172.02(14) ?  
O4b M2b2 O8a . . 2\_744 90.55(15) ?  
O4b M2b2 O13b . . . 89.41(14) ?  
O6b M2b2 O8a 3\_754 . 2\_744 88.87(15) ?  
O6b M2b2 O13b 3\_754 . . 82.63(14) ?  
O8a M2b2 O13b 2\_744 . . 90.44(14) ?  
M2b1 M2b3 M2b2 . . . 0 ?  
M2b1 M2b3 M3b1 . . . 0 ?  
M2b1 M2b3 M3b2 . . . 0 ?  
M2b1 M2b3 P2a . . 2\_744 0 ?  
M2b1 M2b3 P2b . . 3\_754 0 ?  
M2b1 M2b3 P1a . . 4\_553 0 ?  
M2b1 M2b3 P1b . . . 0 ?  
M2b1 M2b3 A1b . . 3\_764 0 ?  
M2b1 M2b3 A2b . . 4\_544 0 ?  
M2b1 M2b3 X2 . . . 0 ?  
M2b1 M2b3 O2a . . 4\_553 0 ?  
M2b1 M2b3 O4b . . . 0 ?  
M2b1 M2b3 O6b . . 3\_754 0 ?  
M2b1 M2b3 O8a . . 2\_744 0 ?  
M2b1 M2b3 O13b . . . 0 ?  
M2b2 M2b3 M3b1 . . . 0 ?  
M2b2 M2b3 M3b2 . . . 0 ?  
M2b2 M2b3 P2a . . 2\_744 0 ?  
M2b2 M2b3 P2b . . 3\_754 0 ?  
M2b2 M2b3 P1a . . 4\_553 0 ?  
M2b2 M2b3 P1b . . . 0 ?  
M2b2 M2b3 A1b . . 3\_764 0 ?  
M2b2 M2b3 A2b . . 4\_544 0 ?  
M2b2 M2b3 X2 . . . 0 ?  
M2b2 M2b3 O2a . . 4\_553 0 ?  
M2b2 M2b3 O4b . . . 0 ?  
M2b2 M2b3 O6b . . 3\_754 0 ?  
M2b2 M2b3 O8a . . 2\_744 0 ?  
M2b2 M2b3 O13b . . . 0 ?  
M3b1 M2b3 M3b2 . . . 0 ?  
M3b1 M2b3 P2a . . 2\_744 123.23(4) ?  
M3b1 M2b3 P2b . . 3\_754 58.12(3) ?  
M3b1 M2b3 P1a . . 4\_553 57.96(3) ?  
M3b1 M2b3 P1b . . . 125.66(4) ?  
M3b1 M2b3 A1b . . 3\_764 141.36(4) ?  
M3b1 M2b3 A2b . . 4\_544 64.20(3) ?  
M3b1 M2b3 X2 . . . 22.84(12) ?  
M3b1 M2b3 O2a . . 4\_553 75.94(10) ?

M3b1 M2b3 O4b . . . 111.29(10) ?  
M3b1 M2b3 O6b . . 3\_754 76.40(10) ?  
M3b1 M2b3 O8a . . 2\_744 108.47(10) ?  
M3b1 M2b3 O13b . . . 151.19(12) ?  
M3b2 M2b3 P2a . . 2\_744 123.23(4) ?  
M3b2 M2b3 P2b . . 3\_754 58.12(3) ?  
M3b2 M2b3 P1a . . 4\_553 57.96(3) ?  
M3b2 M2b3 P1b . . . 125.66(4) ?  
M3b2 M2b3 A1b . . 3\_764 141.36(4) ?  
M3b2 M2b3 A2b . . 4\_544 64.20(3) ?  
M3b2 M2b3 X2 . . . 22.84(12) ?  
M3b2 M2b3 O2a . . 4\_553 75.94(10) ?  
M3b2 M2b3 O4b . . . 111.29(10) ?  
M3b2 M2b3 O6b . . 3\_754 76.40(10) ?  
M3b2 M2b3 O8a . . 2\_744 108.47(10) ?  
M3b2 M2b3 O13b . . . 151.19(12) ?  
P2a M2b3 P2b 2\_744 . 3\_754 108.85(4) ?  
P2a M2b3 P1a 2\_744 . 4\_553 178.72(5) ?  
P2a M2b3 P1b 2\_744 . . 70.30(4) ?  
P2a M2b3 A1b 2\_744 . 3\_764 46.39(5) ?  
P2a M2b3 A2b 2\_744 . 4\_544 115.34(4) ?  
P2a M2b3 X2 2\_744 . . 106.65(12) ?  
P2a M2b3 O2a 2\_744 . 4\_553 160.60(10) ?  
P2a M2b3 O4b 2\_744 . . 82.19(11) ?  
P2a M2b3 O6b 2\_744 . 3\_754 95.44(11) ?  
P2a M2b3 O8a 2\_744 . 2\_744 15.08(10) ?  
P2a M2b3 O13b 2\_744 . . 77.88(11) ?  
P2b M2b3 P1a 3\_754 . 4\_553 71.28(4) ?  
P2b M2b3 P1b 3\_754 . . 176.09(5) ?  
P2b M2b3 A1b 3\_754 . 3\_764 88.09(5) ?  
P2b M2b3 A2b 3\_754 . 4\_544 120.01(4) ?  
P2b M2b3 X2 3\_754 . . 76.53(12) ?  
P2b M2b3 O2a 3\_754 . 4\_553 83.07(10) ?  
P2b M2b3 O4b 3\_754 . . 167.54(11) ?  
P2b M2b3 O6b 3\_754 . 3\_754 18.87(10) ?  
P2b M2b3 O8a 3\_754 . 2\_744 99.01(11) ?  
P2b M2b3 O13b 3\_754 . . 98.42(11) ?  
P1a M2b3 P1b 4\_553 . . 109.49(4) ?  
P1a M2b3 A1b 4\_553 . 3\_764 132.47(5) ?  
P1a M2b3 A2b 4\_553 . 4\_544 65.42(4) ?  
P1a M2b3 X2 4\_553 . . 74.63(12) ?  
P1a M2b3 O2a 4\_553 . 4\_553 18.30(10) ?  
P1a M2b3 O4b 4\_553 . . 97.82(11) ?  
P1a M2b3 O6b 4\_553 . 3\_754 84.37(11) ?  
P1a M2b3 O8a 4\_553 . 2\_744 165.96(11) ?  
P1a M2b3 O13b 4\_553 . . 100.84(11) ?  
P1b M2b3 A1b . . 3\_764 88.68(5) ?  
P1b M2b3 A2b . . 4\_544 63.31(4) ?  
P1b M2b3 X2 . . . 107.38(12) ?  
P1b M2b3 O2a . . 4\_553 96.75(10) ?  
P1b M2b3 O4b . . . 15.34(10) ?  
P1b M2b3 O6b . . 3\_754 157.66(11) ?  
P1b M2b3 O8a . . 2\_744 80.90(11) ?  
P1b M2b3 O13b . . . 77.67(11) ?

A1b M2b3 A2b 3\_764 . 4\_544 151.85(5) ?  
A1b M2b3 X2 3\_764 . . 142.48(11) ?  
A1b M2b3 O2a 3\_764 . 4\_553 121.49(10) ?  
A1b M2b3 O4b 3\_764 . . 104.00(11) ?  
A1b M2b3 O6b 3\_764 . 3\_754 69.28(11) ?  
A1b M2b3 O8a 3\_764 . 2\_744 54.93(11) ?  
A1b M2b3 O13b 3\_764 . . 39.05(10) ?  
A2b M2b3 X2 4\_544 . . 53.71(10) ?  
A2b M2b3 O2a 4\_544 . 4\_553 68.10(10) ?  
A2b M2b3 O4b 4\_544 . . 48.06(10) ?  
A2b M2b3 O6b 4\_544 . 3\_754 138.86(11) ?  
A2b M2b3 O8a 4\_544 . 2\_744 113.72(11) ?  
A2b M2b3 O13b 4\_544 . . 128.30(10) ?  
X2 M2b3 O2a . . 4\_553 90.77(15) ?  
X2 M2b3 O4b . . . 95.04(15) ?  
X2 M2b3 O6b . . 3\_754 92.94(15) ?  
X2 M2b3 O8a . . 2\_744 93.50(15) ?  
X2 M2b3 O13b . . . 174.03(17) ?  
O2a M2b3 O4b 4\_553 . . 87.95(15) ?  
O2a M2b3 O6b 4\_553 . 3\_754 92.03(15) ?  
O2a M2b3 O8a 4\_553 . 2\_744 175.58(14) ?  
O2a M2b3 O13b 4\_553 . . 85.39(14) ?  
O4b M2b3 O6b . . 3\_754 172.02(14) ?  
O4b M2b3 O8a . . 2\_744 90.55(15) ?  
O4b M2b3 O13b . . . 89.41(14) ?  
O6b M2b3 O8a 3\_754 . 2\_744 88.87(15) ?  
O6b M2b3 O13b 3\_754 . . 82.63(14) ?  
O8a M2b3 O13b 2\_744 . . 90.44(14) ?  
M2a1 M3a1 M2a1 . . 3\_666 180 ?  
M2a1 M3a1 M2a2 . . . 0 ?  
M2a1 M3a1 M2a2 . . 3\_666 180 ?  
M2a1 M3a1 M2a3 . . . 0 ?  
M2a1 M3a1 M2a3 . . 3\_666 180 ?  
M2a1 M3a1 M3a2 . . . 0 ?  
M2a1 M3a1 P2a . . . 122.17(3) ?  
M2a1 M3a1 P2a . . 3\_666 57.83(3) ?  
M2a1 M3a1 P1b . . 2\_754 121.25(3) ?  
M2a1 M3a1 P1b . . 4\_456 58.75(3) ?  
M2a1 M3a1 A1b . . 2\_645 117.61(5) ?  
M2a1 M3a1 A1b . . 4\_565 62.39(5) ?  
M2a1 M3a1 X1 . . . 22.46(12) ?  
M2a1 M3a1 X1 . . 3\_666 157.54(12) ?  
M2a1 M3a1 O3b . . 2\_754 103.75(10) ?  
M2a1 M3a1 O3b . . 4\_456 76.25(10) ?  
M2a1 M3a1 O7a . . . 104.77(10) ?  
M2a1 M3a1 O7a . . 3\_666 75.23(10) ?  
M2a1 M3a1 M2a2 3\_666 . . 180 ?  
M2a1 M3a1 M2a2 3\_666 . 3\_666 0 ?  
M2a1 M3a1 M2a3 3\_666 . . 180 ?  
M2a1 M3a1 M2a3 3\_666 . 3\_666 0 ?  
M2a1 M3a1 M3a2 3\_666 . . 0 ?  
M2a1 M3a1 P2a 3\_666 . . 57.83(3) ?  
M2a1 M3a1 P2a 3\_666 . 3\_666 122.17(3) ?  
M2a1 M3a1 P1b 3\_666 . 2\_754 58.75(3) ?

M2a1 M3a1 P1b 3\_666 . 4\_456 121.25(3) ?  
M2a1 M3a1 A1b 3\_666 . 2\_645 62.39(5) ?  
M2a1 M3a1 A1b 3\_666 . 4\_565 117.61(5) ?  
M2a1 M3a1 X1 3\_666 . . 157.54(12) ?  
M2a1 M3a1 X1 3\_666 . 3\_666 22.46(12) ?  
M2a1 M3a1 O3b 3\_666 . 2\_754 76.25(10) ?  
M2a1 M3a1 O3b 3\_666 . 4\_456 103.75(10) ?  
M2a1 M3a1 O7a 3\_666 . . 75.23(10) ?  
M2a1 M3a1 O7a 3\_666 . 3\_666 104.77(10) ?  
M2a2 M3a1 M2a2 . . 3\_666 180 ?  
M2a2 M3a1 M2a3 . . . 0 ?  
M2a2 M3a1 M2a3 . . 3\_666 180 ?  
M2a2 M3a1 M3a2 . . . 0 ?  
M2a2 M3a1 P2a . . . 122.17(3) ?  
M2a2 M3a1 P2a . . 3\_666 57.83(3) ?  
M2a2 M3a1 P1b . . 2\_754 121.25(3) ?  
M2a2 M3a1 P1b . . 4\_456 58.75(3) ?  
M2a2 M3a1 A1b . . 2\_645 117.61(5) ?  
M2a2 M3a1 A1b . . 4\_565 62.39(5) ?  
M2a2 M3a1 X1 . . . 22.46(12) ?  
M2a2 M3a1 X1 . . 3\_666 157.54(12) ?  
M2a2 M3a1 O3b . . 2\_754 103.75(10) ?  
M2a2 M3a1 O3b . . 4\_456 76.25(10) ?  
M2a2 M3a1 O7a . . . 104.77(10) ?  
M2a2 M3a1 O7a . . 3\_666 75.23(10) ?  
M2a2 M3a1 M2a3 3\_666 . . 180 ?  
M2a2 M3a1 M2a3 3\_666 . 3\_666 0 ?  
M2a2 M3a1 M3a2 3\_666 . . 0 ?  
M2a2 M3a1 P2a 3\_666 . . 57.83(3) ?  
M2a2 M3a1 P2a 3\_666 . 3\_666 122.17(3) ?  
M2a2 M3a1 P1b 3\_666 . 2\_754 58.75(3) ?  
M2a2 M3a1 P1b 3\_666 . 4\_456 121.25(3) ?  
M2a2 M3a1 A1b 3\_666 . 2\_645 62.39(5) ?  
M2a2 M3a1 A1b 3\_666 . 4\_565 117.61(5) ?  
M2a2 M3a1 X1 3\_666 . . 157.54(12) ?  
M2a2 M3a1 X1 3\_666 . 3\_666 22.46(12) ?  
M2a2 M3a1 O3b 3\_666 . 2\_754 76.25(10) ?  
M2a2 M3a1 O3b 3\_666 . 4\_456 103.75(10) ?  
M2a2 M3a1 O7a 3\_666 . . 75.23(10) ?  
M2a2 M3a1 O7a 3\_666 . 3\_666 104.77(10) ?  
M2a3 M3a1 M2a3 . . 3\_666 180 ?  
M2a3 M3a1 M3a2 . . . 0 ?  
M2a3 M3a1 P2a . . . 122.17(3) ?  
M2a3 M3a1 P2a . . 3\_666 57.83(3) ?  
M2a3 M3a1 P1b . . 2\_754 121.25(3) ?  
M2a3 M3a1 P1b . . 4\_456 58.75(3) ?  
M2a3 M3a1 A1b . . 2\_645 117.61(5) ?  
M2a3 M3a1 A1b . . 4\_565 62.39(5) ?  
M2a3 M3a1 X1 . . . 22.46(12) ?  
M2a3 M3a1 X1 . . 3\_666 157.54(12) ?  
M2a3 M3a1 O3b . . 2\_754 103.75(10) ?  
M2a3 M3a1 O3b . . 4\_456 76.25(10) ?  
M2a3 M3a1 O7a . . . 104.77(10) ?  
M2a3 M3a1 O7a . . 3\_666 75.23(10) ?

M2a3 M3a1 M3a2 3\_666 . . 0 ?  
M2a3 M3a1 P2a 3\_666 . . 57.83(3) ?  
M2a3 M3a1 P2a 3\_666 . 3\_666 122.17(3) ?  
M2a3 M3a1 P1b 3\_666 . 2\_754 58.75(3) ?  
M2a3 M3a1 P1b 3\_666 . 4\_456 121.25(3) ?  
M2a3 M3a1 A1b 3\_666 . 2\_645 62.39(5) ?  
M2a3 M3a1 A1b 3\_666 . 4\_565 117.61(5) ?  
M2a3 M3a1 X1 3\_666 . . 157.54(12) ?  
M2a3 M3a1 X1 3\_666 . 3\_666 22.46(12) ?  
M2a3 M3a1 O3b 3\_666 . 2\_754 76.25(10) ?  
M2a3 M3a1 O3b 3\_666 . 4\_456 103.75(10) ?  
M2a3 M3a1 O7a 3\_666 . . 75.23(10) ?  
M2a3 M3a1 O7a 3\_666 . 3\_666 104.77(10) ?  
M3a2 M3a1 P2a . . . 0 ?  
M3a2 M3a1 P2a . . 3\_666 0 ?  
M3a2 M3a1 P1b . . 2\_754 0 ?  
M3a2 M3a1 P1b . . 4\_456 0 ?  
M3a2 M3a1 A1b . . 2\_645 0 ?  
M3a2 M3a1 A1b . . 4\_565 0 ?  
M3a2 M3a1 X1 . . . 0 ?  
M3a2 M3a1 X1 . . 3\_666 0 ?  
M3a2 M3a1 O3b . . 2\_754 0 ?  
M3a2 M3a1 O3b . . 4\_456 0 ?  
M3a2 M3a1 O7a . . . 0 ?  
M3a2 M3a1 O7a . . 3\_666 0 ?  
P2a M3a1 P2a . . 3\_666 180 ?  
P2a M3a1 P1b . . 2\_754 71.59(4) ?  
P2a M3a1 P1b . . 4\_456 108.41(4) ?  
P2a M3a1 A1b . . 2\_645 117.73(5) ?  
P2a M3a1 A1b . . 4\_565 62.27(5) ?  
P2a M3a1 X1 . . . 104.35(11) ?  
P2a M3a1 X1 . . 3\_666 75.65(11) ?  
P2a M3a1 O3b . . 2\_754 83.07(11) ?  
P2a M3a1 O3b . . 4\_456 96.93(11) ?  
P2a M3a1 O7a . . . 17.69(10) ?  
P2a M3a1 O7a . . 3\_666 162.31(10) ?  
P2a M3a1 P1b 3\_666 . 2\_754 108.41(4) ?  
P2a M3a1 P1b 3\_666 . 4\_456 71.59(4) ?  
P2a M3a1 A1b 3\_666 . 2\_645 62.27(5) ?  
P2a M3a1 A1b 3\_666 . 4\_565 117.73(5) ?  
P2a M3a1 X1 3\_666 . . 75.65(11) ?  
P2a M3a1 X1 3\_666 . 3\_666 104.35(11) ?  
P2a M3a1 O3b 3\_666 . 2\_754 96.93(11) ?  
P2a M3a1 O3b 3\_666 . 4\_456 83.07(11) ?  
P2a M3a1 O7a 3\_666 . . 162.31(10) ?  
P2a M3a1 O7a 3\_666 . 3\_666 17.69(10) ?  
P1b M3a1 P1b 2\_754 . 4\_456 180 ?  
P1b M3a1 A1b 2\_754 . 2\_645 63.99(5) ?  
P1b M3a1 A1b 2\_754 . 4\_565 116.01(5) ?  
P1b M3a1 X1 2\_754 . . 104.58(11) ?  
P1b M3a1 X1 2\_754 . 3\_666 75.42(11) ?  
P1b M3a1 O3b 2\_754 . 2\_754 17.80(10) ?  
P1b M3a1 O3b 2\_754 . 4\_456 162.20(10) ?  
P1b M3a1 O7a 2\_754 . . 82.70(10) ?

P1b M3a1 07a 2\_754 . 3\_666 97.30(10) ?  
 P1b M3a1 A1b 4\_456 . 2\_645 116.01(5) ?  
 P1b M3a1 A1b 4\_456 . 4\_565 63.99(5) ?  
 P1b M3a1 X1 4\_456 . . 75.42(11) ?  
 P1b M3a1 X1 4\_456 . 3\_666 104.58(11) ?  
 P1b M3a1 03b 4\_456 . 2\_754 162.20(10) ?  
 P1b M3a1 03b 4\_456 . 4\_456 17.80(10) ?  
 P1b M3a1 07a 4\_456 . . 97.30(10) ?  
 P1b M3a1 07a 4\_456 . 3\_666 82.70(10) ?  
 A1b M3a1 A1b 2\_645 . 4\_565 180 ?  
 A1b M3a1 X1 2\_645 . . 126.96(11) ?  
 A1b M3a1 X1 2\_645 . 3\_666 53.04(11) ?  
 A1b M3a1 03b 2\_645 . 2\_754 67.28(11) ?  
 A1b M3a1 03b 2\_645 . 4\_456 112.72(11) ?  
 A1b M3a1 07a 2\_645 . . 135.26(11) ?  
 A1b M3a1 07a 2\_645 . 3\_666 44.74(11) ?  
 A1b M3a1 X1 4\_565 . . 53.04(11) ?  
 A1b M3a1 X1 4\_565 . 3\_666 126.96(11) ?  
 A1b M3a1 03b 4\_565 . 2\_754 112.72(11) ?  
 A1b M3a1 03b 4\_565 . 4\_456 67.28(11) ?  
 A1b M3a1 07a 4\_565 . . 44.74(11) ?  
 A1b M3a1 07a 4\_565 . 3\_666 135.26(11) ?  
 X1 M3a1 X1 . . 3\_666 180 ?  
 X1 M3a1 03b . . 2\_754 88.74(14) ?  
 X1 M3a1 03b . . 4\_456 91.26(14) ?  
 X1 M3a1 07a . . . 88.40(14) ?  
 X1 M3a1 07a . . 3\_666 91.60(14) ?  
 X1 M3a1 03b 3\_666 . 2\_754 91.26(14) ?  
 X1 M3a1 03b 3\_666 . 4\_456 88.74(14) ?  
 X1 M3a1 07a 3\_666 . . 91.60(14) ?  
 X1 M3a1 07a 3\_666 . 3\_666 88.40(14) ?  
 03b M3a1 03b 2\_754 . 4\_456 180 ?  
 03b M3a1 07a 2\_754 . . 90.21(14) ?  
 03b M3a1 07a 2\_754 . 3\_666 89.79(14) ?  
 03b M3a1 07a 4\_456 . . 89.79(14) ?  
 03b M3a1 07a 4\_456 . 3\_666 90.21(14) ?  
 07a M3a1 07a . . 3\_666 180 ?  
 M2b1 M3b1 M2b1 . . 3\_754 180 ?  
 M2b1 M3b1 M2b2 . . . 0 ?  
 M2b1 M3b1 M2b2 . . 3\_754 180 ?  
 M2b1 M3b1 M2b3 . . . 0 ?  
 M2b1 M3b1 M2b3 . . 3\_754 180 ?  
 M2b1 M3b1 M3b2 . . . 0 ?  
 M2b1 M3b1 P2b . . . 121.94(3) ?  
 M2b1 M3b1 P2b . . 3\_754 58.06(3) ?  
 M2b1 M3b1 P1a . . 2\_745 121.02(3) ?  
 M2b1 M3b1 P1a . . 4\_553 58.98(3) ?  
 M2b1 M3b1 A2b . . 2\_754 117.91(3) ?  
 M2b1 M3b1 A2b . . 4\_544 62.09(3) ?  
 M2b1 M3b1 X2 . . . 21.61(11) ?  
 M2b1 M3b1 X2 . . 3\_754 158.39(11) ?  
 M2b1 M3b1 03a . . 2\_745 103.44(10) ?  
 M2b1 M3b1 03a . . 4\_553 76.56(10) ?  
 M2b1 M3b1 07b . . . 104.30(10) ?



M2b1 M3b1 O7b . . 3\_754 75.70(10) ?  
M2b1 M3b1 M2b2 3\_754 . . 180 ?  
M2b1 M3b1 M2b2 3\_754 . 3\_754 0 ?  
M2b1 M3b1 M2b3 3\_754 . . 180 ?  
M2b1 M3b1 M2b3 3\_754 . 3\_754 0 ?  
M2b1 M3b1 M3b2 3\_754 . . 0 ?  
M2b1 M3b1 P2b 3\_754 . . 58.06(3) ?  
M2b1 M3b1 P2b 3\_754 . 3\_754 121.94(3) ?  
M2b1 M3b1 P1a 3\_754 . 2\_745 58.98(3) ?  
M2b1 M3b1 P1a 3\_754 . 4\_553 121.02(3) ?  
M2b1 M3b1 A2b 3\_754 . 2\_754 62.09(3) ?  
M2b1 M3b1 A2b 3\_754 . 4\_544 117.91(3) ?  
M2b1 M3b1 X2 3\_754 . . 158.39(11) ?  
M2b1 M3b1 X2 3\_754 . 3\_754 21.61(11) ?  
M2b1 M3b1 O3a 3\_754 . 2\_745 76.56(10) ?  
M2b1 M3b1 O3a 3\_754 . 4\_553 103.44(10) ?  
M2b1 M3b1 O7b 3\_754 . . 75.70(10) ?  
M2b1 M3b1 O7b 3\_754 . 3\_754 104.30(10) ?  
M2b2 M3b1 M2b2 . . 3\_754 180 ?  
M2b2 M3b1 M2b3 . . . 0 ?  
M2b2 M3b1 M2b3 . . 3\_754 180 ?  
M2b2 M3b1 M3b2 . . . 0 ?  
M2b2 M3b1 P2b . . . 121.94(3) ?  
M2b2 M3b1 P2b . . 3\_754 58.06(3) ?  
M2b2 M3b1 P1a . . 2\_745 121.02(3) ?  
M2b2 M3b1 P1a . . 4\_553 58.98(3) ?  
M2b2 M3b1 A2b . . 2\_754 117.91(3) ?  
M2b2 M3b1 A2b . . 4\_544 62.09(3) ?  
M2b2 M3b1 X2 . . . 21.61(11) ?  
M2b2 M3b1 X2 . . 3\_754 158.39(11) ?  
M2b2 M3b1 O3a . . 2\_745 103.44(10) ?  
M2b2 M3b1 O3a . . 4\_553 76.56(10) ?  
M2b2 M3b1 O7b . . . 104.30(10) ?  
M2b2 M3b1 O7b . . 3\_754 75.70(10) ?  
M2b2 M3b1 M2b3 3\_754 . . 180 ?  
M2b2 M3b1 M2b3 3\_754 . 3\_754 0 ?  
M2b2 M3b1 M3b2 3\_754 . . 0 ?  
M2b2 M3b1 P2b 3\_754 . . 58.06(3) ?  
M2b2 M3b1 P2b 3\_754 . 3\_754 121.94(3) ?  
M2b2 M3b1 P1a 3\_754 . 2\_745 58.98(3) ?  
M2b2 M3b1 P1a 3\_754 . 4\_553 121.02(3) ?  
M2b2 M3b1 A2b 3\_754 . 2\_754 62.09(3) ?  
M2b2 M3b1 A2b 3\_754 . 4\_544 117.91(3) ?  
M2b2 M3b1 X2 3\_754 . . 158.39(11) ?  
M2b2 M3b1 X2 3\_754 . 3\_754 21.61(11) ?  
M2b2 M3b1 O3a 3\_754 . 2\_745 76.56(10) ?  
M2b2 M3b1 O3a 3\_754 . 4\_553 103.44(10) ?  
M2b2 M3b1 O7b 3\_754 . . 75.70(10) ?  
M2b2 M3b1 O7b 3\_754 . 3\_754 104.30(10) ?  
M2b3 M3b1 M2b3 . . 3\_754 180 ?  
M2b3 M3b1 M3b2 . . . 0 ?  
M2b3 M3b1 P2b . . . 121.94(3) ?  
M2b3 M3b1 P2b . . 3\_754 58.06(3) ?  
M2b3 M3b1 P1a . . 2\_745 121.02(3) ?

M2b3 M3b1 P1a . . 4\_553 58.98(3) ?  
M2b3 M3b1 A2b . . 2\_754 117.91(3) ?  
M2b3 M3b1 A2b . . 4\_544 62.09(3) ?  
M2b3 M3b1 X2 . . . 21.61(11) ?  
M2b3 M3b1 X2 . . 3\_754 158.39(11) ?  
M2b3 M3b1 O3a . . 2\_745 103.44(10) ?  
M2b3 M3b1 O3a . . 4\_553 76.56(10) ?  
M2b3 M3b1 O7b . . . 104.30(10) ?  
M2b3 M3b1 O7b . . 3\_754 75.70(10) ?  
M2b3 M3b1 M3b2 3\_754 . . 0 ?  
M2b3 M3b1 P2b 3\_754 . . 58.06(3) ?  
M2b3 M3b1 P2b 3\_754 . 3\_754 121.94(3) ?  
M2b3 M3b1 P1a 3\_754 . 2\_745 58.98(3) ?  
M2b3 M3b1 P1a 3\_754 . 4\_553 121.02(3) ?  
M2b3 M3b1 A2b 3\_754 . 2\_754 62.09(3) ?  
M2b3 M3b1 A2b 3\_754 . 4\_544 117.91(3) ?  
M2b3 M3b1 X2 3\_754 . . 158.39(11) ?  
M2b3 M3b1 X2 3\_754 . 3\_754 21.61(11) ?  
M2b3 M3b1 O3a 3\_754 . 2\_745 76.56(10) ?  
M2b3 M3b1 O3a 3\_754 . 4\_553 103.44(10) ?  
M2b3 M3b1 O7b 3\_754 . . 75.70(10) ?  
M2b3 M3b1 O7b 3\_754 . 3\_754 104.30(10) ?  
M3b2 M3b1 P2b . . . 0 ?  
M3b2 M3b1 P2b . . 3\_754 0 ?  
M3b2 M3b1 P1a . . 2\_745 0 ?  
M3b2 M3b1 P1a . . 4\_553 0 ?  
M3b2 M3b1 A2b . . 2\_754 0 ?  
M3b2 M3b1 A2b . . 4\_544 0 ?  
M3b2 M3b1 X2 . . . 0 ?  
M3b2 M3b1 X2 . . 3\_754 0 ?  
M3b2 M3b1 O3a . . 2\_745 0 ?  
M3b2 M3b1 O3a . . 4\_553 0 ?  
M3b2 M3b1 O7b . . . 0 ?  
M3b2 M3b1 O7b . . 3\_754 0 ?  
P2b M3b1 P2b . . 3\_754 180 ?  
P2b M3b1 P1a . . 2\_745 71.71(4) ?  
P2b M3b1 P1a . . 4\_553 108.29(4) ?  
P2b M3b1 A2b . . 2\_754 117.94(4) ?  
P2b M3b1 A2b . . 4\_544 62.06(4) ?  
P2b M3b1 X2 . . . 104.54(11) ?  
P2b M3b1 X2 . . 3\_754 75.46(11) ?  
P2b M3b1 O3a . . 2\_745 82.43(10) ?  
P2b M3b1 O3a . . 4\_553 97.57(10) ?  
P2b M3b1 O7b . . . 18.07(10) ?  
P2b M3b1 O7b . . 3\_754 161.93(10) ?  
P2b M3b1 P1a 3\_754 . 2\_745 108.29(4) ?  
P2b M3b1 P1a 3\_754 . 4\_553 71.71(4) ?  
P2b M3b1 A2b 3\_754 . 2\_754 62.06(4) ?  
P2b M3b1 A2b 3\_754 . 4\_544 117.94(4) ?  
P2b M3b1 X2 3\_754 . . 75.46(11) ?  
P2b M3b1 X2 3\_754 . 3\_754 104.54(11) ?  
P2b M3b1 O3a 3\_754 . 2\_745 97.57(10) ?  
P2b M3b1 O3a 3\_754 . 4\_553 82.43(10) ?  
P2b M3b1 O7b 3\_754 . . 161.93(10) ?

P2b M3b1 07b 3\_754 . 3\_754 18.07(10) ?  
 P1a M3b1 P1a 2\_745 . 4\_553 180 ?  
 P1a M3b1 A2b 2\_745 . 2\_754 64.86(4) ?  
 P1a M3b1 A2b 2\_745 . 4\_544 115.14(4) ?  
 P1a M3b1 X2 2\_745 . . 105.33(11) ?  
 P1a M3b1 X2 2\_745 . 3\_754 74.67(11) ?  
 P1a M3b1 03a 2\_745 . 2\_745 17.75(10) ?  
 P1a M3b1 03a 2\_745 . 4\_553 162.25(10) ?  
 P1a M3b1 07b 2\_745 . . 83.60(10) ?  
 P1a M3b1 07b 2\_745 . 3\_754 96.40(10) ?  
 P1a M3b1 A2b 4\_553 . 2\_754 115.14(4) ?  
 P1a M3b1 A2b 4\_553 . 4\_544 64.86(4) ?  
 P1a M3b1 X2 4\_553 . . 74.67(11) ?  
 P1a M3b1 X2 4\_553 . 3\_754 105.33(11) ?  
 P1a M3b1 03a 4\_553 . 2\_745 162.25(10) ?  
 P1a M3b1 03a 4\_553 . 4\_553 17.75(10) ?  
 P1a M3b1 07b 4\_553 . . 96.40(10) ?  
 P1a M3b1 07b 4\_553 . 3\_754 83.60(10) ?  
 A2b M3b1 A2b 2\_754 . 4\_544 180 ?  
 A2b M3b1 X2 2\_754 . . 127.80(10) ?  
 A2b M3b1 X2 2\_754 . 3\_754 52.20(10) ?  
 A2b M3b1 03a 2\_754 . 2\_745 69.18(10) ?  
 A2b M3b1 03a 2\_754 . 4\_553 110.82(10) ?  
 A2b M3b1 07b 2\_754 . . 135.97(10) ?  
 A2b M3b1 07b 2\_754 . 3\_754 44.03(10) ?  
 A2b M3b1 X2 4\_544 . . 52.20(10) ?  
 A2b M3b1 X2 4\_544 . 3\_754 127.80(10) ?  
 A2b M3b1 03a 4\_544 . 2\_745 110.82(10) ?  
 A2b M3b1 03a 4\_544 . 4\_553 69.18(10) ?  
 A2b M3b1 07b 4\_544 . . 44.03(10) ?  
 A2b M3b1 07b 4\_544 . 3\_754 135.97(10) ?  
 X2 M3b1 X2 . . 3\_754 180 ?  
 X2 M3b1 03a . . 2\_745 89.13(14) ?  
 X2 M3b1 03a . . 4\_553 90.87(14) ?  
 X2 M3b1 07b . . . 88.44(14) ?  
 X2 M3b1 07b . . 3\_754 91.56(14) ?  
 X2 M3b1 03a 3\_754 . 2\_745 90.87(14) ?  
 X2 M3b1 03a 3\_754 . 4\_553 89.13(14) ?  
 X2 M3b1 07b 3\_754 . . 91.56(14) ?  
 X2 M3b1 07b 3\_754 . 3\_754 88.44(14) ?  
 03a M3b1 03a 2\_745 . 4\_553 180 ?  
 03a M3b1 07b 2\_745 . . 90.22(14) ?  
 03a M3b1 07b 2\_745 . 3\_754 89.78(14) ?  
 03a M3b1 07b 4\_553 . . 89.78(14) ?  
 03a M3b1 07b 4\_553 . 3\_754 90.22(14) ?  
 07b M3b1 07b . . 3\_754 180 ?  
 M2a1 M3a2 M2a1 . . 3\_666 180 ?  
 M2a1 M3a2 M2a2 . . . 0 ?  
 M2a1 M3a2 M2a2 . . 3\_666 180 ?  
 M2a1 M3a2 M2a3 . . . 0 ?  
 M2a1 M3a2 M2a3 . . 3\_666 180 ?  
 M2a1 M3a2 M3a1 . . . 0 ?  
 M2a1 M3a2 P2a . . . 122.17(3) ?  
 M2a1 M3a2 P2a . . 3\_666 57.83(3) ?

M2a1 M3a2 P1b . . 2\_754 121.25(3) ?  
M2a1 M3a2 P1b . . 4\_456 58.75(3) ?  
M2a1 M3a2 A1b . . 2\_645 117.61(5) ?  
M2a1 M3a2 A1b . . 4\_565 62.39(5) ?  
M2a1 M3a2 X1 . . . 22.46(12) ?  
M2a1 M3a2 X1 . . 3\_666 157.54(12) ?  
M2a1 M3a2 O3b . . 2\_754 103.75(10) ?  
M2a1 M3a2 O3b . . 4\_456 76.25(10) ?  
M2a1 M3a2 O7a . . . 104.77(10) ?  
M2a1 M3a2 O7a . . 3\_666 75.23(10) ?  
M2a1 M3a2 M2a2 3\_666 . . 180 ?  
M2a1 M3a2 M2a2 3\_666 . 3\_666 0 ?  
M2a1 M3a2 M2a3 3\_666 . . 180 ?  
M2a1 M3a2 M2a3 3\_666 . 3\_666 0 ?  
M2a1 M3a2 M3a1 3\_666 . . 0 ?  
M2a1 M3a2 P2a 3\_666 . . 57.83(3) ?  
M2a1 M3a2 P2a 3\_666 . 3\_666 122.17(3) ?  
M2a1 M3a2 P1b 3\_666 . 2\_754 58.75(3) ?  
M2a1 M3a2 P1b 3\_666 . 4\_456 121.25(3) ?  
M2a1 M3a2 A1b 3\_666 . 2\_645 62.39(5) ?  
M2a1 M3a2 A1b 3\_666 . 4\_565 117.61(5) ?  
M2a1 M3a2 X1 3\_666 . . 157.54(12) ?  
M2a1 M3a2 X1 3\_666 . 3\_666 22.46(12) ?  
M2a1 M3a2 O3b 3\_666 . 2\_754 76.25(10) ?  
M2a1 M3a2 O3b 3\_666 . 4\_456 103.75(10) ?  
M2a1 M3a2 O7a 3\_666 . . 75.23(10) ?  
M2a1 M3a2 O7a 3\_666 . 3\_666 104.77(10) ?  
M2a2 M3a2 M2a2 . . 3\_666 180 ?  
M2a2 M3a2 M2a3 . . . 0 ?  
M2a2 M3a2 M2a3 . . 3\_666 180 ?  
M2a2 M3a2 M3a1 . . . 0 ?  
M2a2 M3a2 P2a . . . 122.17(3) ?  
M2a2 M3a2 P2a . . 3\_666 57.83(3) ?  
M2a2 M3a2 P1b . . 2\_754 121.25(3) ?  
M2a2 M3a2 P1b . . 4\_456 58.75(3) ?  
M2a2 M3a2 A1b . . 2\_645 117.61(5) ?  
M2a2 M3a2 A1b . . 4\_565 62.39(5) ?  
M2a2 M3a2 X1 . . . 22.46(12) ?  
M2a2 M3a2 X1 . . 3\_666 157.54(12) ?  
M2a2 M3a2 O3b . . 2\_754 103.75(10) ?  
M2a2 M3a2 O3b . . 4\_456 76.25(10) ?  
M2a2 M3a2 O7a . . . 104.77(10) ?  
M2a2 M3a2 O7a . . 3\_666 75.23(10) ?  
M2a2 M3a2 M2a3 3\_666 . . 180 ?  
M2a2 M3a2 M2a3 3\_666 . 3\_666 0 ?  
M2a2 M3a2 M3a1 3\_666 . . 0 ?  
M2a2 M3a2 P2a 3\_666 . . 57.83(3) ?  
M2a2 M3a2 P2a 3\_666 . 3\_666 122.17(3) ?  
M2a2 M3a2 P1b 3\_666 . 2\_754 58.75(3) ?  
M2a2 M3a2 P1b 3\_666 . 4\_456 121.25(3) ?  
M2a2 M3a2 A1b 3\_666 . 2\_645 62.39(5) ?  
M2a2 M3a2 A1b 3\_666 . 4\_565 117.61(5) ?  
M2a2 M3a2 X1 3\_666 . . 157.54(12) ?  
M2a2 M3a2 X1 3\_666 . 3\_666 22.46(12) ?

M2a2 M3a2 O3b 3\_666 . 2\_754 76.25(10) ?  
M2a2 M3a2 O3b 3\_666 . 4\_456 103.75(10) ?  
M2a2 M3a2 O7a 3\_666 . . 75.23(10) ?  
M2a2 M3a2 O7a 3\_666 . 3\_666 104.77(10) ?  
M2a3 M3a2 M2a3 . . 3\_666 180 ?  
M2a3 M3a2 M3a1 . . . 0 ?  
M2a3 M3a2 P2a . . . 122.17(3) ?  
M2a3 M3a2 P2a . . 3\_666 57.83(3) ?  
M2a3 M3a2 P1b . . 2\_754 121.25(3) ?  
M2a3 M3a2 P1b . . 4\_456 58.75(3) ?  
M2a3 M3a2 A1b . . 2\_645 117.61(5) ?  
M2a3 M3a2 A1b . . 4\_565 62.39(5) ?  
M2a3 M3a2 X1 . . . 22.46(12) ?  
M2a3 M3a2 X1 . . 3\_666 157.54(12) ?  
M2a3 M3a2 O3b . . 2\_754 103.75(10) ?  
M2a3 M3a2 O3b . . 4\_456 76.25(10) ?  
M2a3 M3a2 O7a . . . 104.77(10) ?  
M2a3 M3a2 O7a . . 3\_666 75.23(10) ?  
M2a3 M3a2 M3a1 3\_666 . . 0 ?  
M2a3 M3a2 P2a 3\_666 . . 57.83(3) ?  
M2a3 M3a2 P2a 3\_666 . 3\_666 122.17(3) ?  
M2a3 M3a2 P1b 3\_666 . 2\_754 58.75(3) ?  
M2a3 M3a2 P1b 3\_666 . 4\_456 121.25(3) ?  
M2a3 M3a2 A1b 3\_666 . 2\_645 62.39(5) ?  
M2a3 M3a2 A1b 3\_666 . 4\_565 117.61(5) ?  
M2a3 M3a2 X1 3\_666 . . 157.54(12) ?  
M2a3 M3a2 X1 3\_666 . 3\_666 22.46(12) ?  
M2a3 M3a2 O3b 3\_666 . 2\_754 76.25(10) ?  
M2a3 M3a2 O3b 3\_666 . 4\_456 103.75(10) ?  
M2a3 M3a2 O7a 3\_666 . . 75.23(10) ?  
M2a3 M3a2 O7a 3\_666 . 3\_666 104.77(10) ?  
M3a1 M3a2 P2a . . . 0 ?  
M3a1 M3a2 P2a . . 3\_666 0 ?  
M3a1 M3a2 P1b . . 2\_754 0 ?  
M3a1 M3a2 P1b . . 4\_456 0 ?  
M3a1 M3a2 A1b . . 2\_645 0 ?  
M3a1 M3a2 A1b . . 4\_565 0 ?  
M3a1 M3a2 X1 . . . 0 ?  
M3a1 M3a2 X1 . . 3\_666 0 ?  
M3a1 M3a2 O3b . . 2\_754 0 ?  
M3a1 M3a2 O3b . . 4\_456 0 ?  
M3a1 M3a2 O7a . . . 0 ?  
M3a1 M3a2 O7a . . 3\_666 0 ?  
P2a M3a2 P2a . . 3\_666 180 ?  
P2a M3a2 P1b . . 2\_754 71.59(4) ?  
P2a M3a2 P1b . . 4\_456 108.41(4) ?  
P2a M3a2 A1b . . 2\_645 117.73(5) ?  
P2a M3a2 A1b . . 4\_565 62.27(5) ?  
P2a M3a2 X1 . . . 104.35(11) ?  
P2a M3a2 X1 . . 3\_666 75.65(11) ?  
P2a M3a2 O3b . . 2\_754 83.07(11) ?  
P2a M3a2 O3b . . 4\_456 96.93(11) ?  
P2a M3a2 O7a . . . 17.69(10) ?  
P2a M3a2 O7a . . 3\_666 162.31(10) ?

P2a M3a2 P1b 3\_666 . 2\_754 108.41(4) ?  
 P2a M3a2 P1b 3\_666 . 4\_456 71.59(4) ?  
 P2a M3a2 A1b 3\_666 . 2\_645 62.27(5) ?  
 P2a M3a2 A1b 3\_666 . 4\_565 117.73(5) ?  
 P2a M3a2 X1 3\_666 . . 75.65(11) ?  
 P2a M3a2 X1 3\_666 . 3\_666 104.35(11) ?  
 P2a M3a2 O3b 3\_666 . 2\_754 96.93(11) ?  
 P2a M3a2 O3b 3\_666 . 4\_456 83.07(11) ?  
 P2a M3a2 O7a 3\_666 . . 162.31(10) ?  
 P2a M3a2 O7a 3\_666 . 3\_666 17.69(10) ?  
 P1b M3a2 P1b 2\_754 . 4\_456 180 ?  
 P1b M3a2 A1b 2\_754 . 2\_645 63.99(5) ?  
 P1b M3a2 A1b 2\_754 . 4\_565 116.01(5) ?  
 P1b M3a2 X1 2\_754 . . 104.58(11) ?  
 P1b M3a2 X1 2\_754 . 3\_666 75.42(11) ?  
 P1b M3a2 O3b 2\_754 . 2\_754 17.80(10) ?  
 P1b M3a2 O3b 2\_754 . 4\_456 162.20(10) ?  
 P1b M3a2 O7a 2\_754 . . 82.70(10) ?  
 P1b M3a2 O7a 2\_754 . 3\_666 97.30(10) ?  
 P1b M3a2 A1b 4\_456 . 2\_645 116.01(5) ?  
 P1b M3a2 A1b 4\_456 . 4\_565 63.99(5) ?  
 P1b M3a2 X1 4\_456 . . 75.42(11) ?  
 P1b M3a2 X1 4\_456 . 3\_666 104.58(11) ?  
 P1b M3a2 O3b 4\_456 . 2\_754 162.20(10) ?  
 P1b M3a2 O3b 4\_456 . 4\_456 17.80(10) ?  
 P1b M3a2 O7a 4\_456 . . 97.30(10) ?  
 P1b M3a2 O7a 4\_456 . 3\_666 82.70(10) ?  
 A1b M3a2 A1b 2\_645 . 4\_565 180 ?  
 A1b M3a2 X1 2\_645 . . 126.96(11) ?  
 A1b M3a2 X1 2\_645 . 3\_666 53.04(11) ?  
 A1b M3a2 O3b 2\_645 . 2\_754 67.28(11) ?  
 A1b M3a2 O3b 2\_645 . 4\_456 112.72(11) ?  
 A1b M3a2 O7a 2\_645 . . 135.26(11) ?  
 A1b M3a2 O7a 2\_645 . 3\_666 44.74(11) ?  
 A1b M3a2 X1 4\_565 . . 53.04(11) ?  
 A1b M3a2 X1 4\_565 . 3\_666 126.96(11) ?  
 A1b M3a2 O3b 4\_565 . 2\_754 112.72(11) ?  
 A1b M3a2 O3b 4\_565 . 4\_456 67.28(11) ?  
 A1b M3a2 O7a 4\_565 . . 44.74(11) ?  
 A1b M3a2 O7a 4\_565 . 3\_666 135.26(11) ?  
 X1 M3a2 X1 . . 3\_666 180 ?  
 X1 M3a2 O3b . . 2\_754 88.74(14) ?  
 X1 M3a2 O3b . . 4\_456 91.26(14) ?  
 X1 M3a2 O7a . . . 88.40(14) ?  
 X1 M3a2 O7a . . 3\_666 91.60(14) ?  
 X1 M3a2 O3b 3\_666 . 2\_754 91.26(14) ?  
 X1 M3a2 O3b 3\_666 . 4\_456 88.74(14) ?  
 X1 M3a2 O7a 3\_666 . . 91.60(14) ?  
 X1 M3a2 O7a 3\_666 . 3\_666 88.40(14) ?  
 O3b M3a2 O3b 2\_754 . 4\_456 180 ?  
 O3b M3a2 O7a 2\_754 . . 90.21(14) ?  
 O3b M3a2 O7a 2\_754 . 3\_666 89.79(14) ?  
 O3b M3a2 O7a 4\_456 . . 89.79(14) ?  
 O3b M3a2 O7a 4\_456 . 3\_666 90.21(14) ?

O7a M3a2 O7a . . 3\_666 180 ?  
 M2b1 M3b2 M2b1 . . 3\_754 180 ?  
 M2b1 M3b2 M2b2 . . . 0 ?  
 M2b1 M3b2 M2b2 . . 3\_754 180 ?  
 M2b1 M3b2 M2b3 . . . 0 ?  
 M2b1 M3b2 M2b3 . . 3\_754 180 ?  
 M2b1 M3b2 M3b1 . . . 0 ?  
 M2b1 M3b2 P2b . . . 121.94(3) ?  
 M2b1 M3b2 P2b . . 3\_754 58.06(3) ?  
 M2b1 M3b2 P1a . . 2\_745 121.02(3) ?  
 M2b1 M3b2 P1a . . 4\_553 58.98(3) ?  
 M2b1 M3b2 A2b . . 2\_754 117.91(3) ?  
 M2b1 M3b2 A2b . . 4\_544 62.09(3) ?  
 M2b1 M3b2 X2 . . . 21.61(11) ?  
 M2b1 M3b2 X2 . . 3\_754 158.39(11) ?  
 M2b1 M3b2 O3a . . 2\_745 103.44(10) ?  
 M2b1 M3b2 O3a . . 4\_553 76.56(10) ?  
 M2b1 M3b2 O7b . . . 104.30(10) ?  
 M2b1 M3b2 O7b . . 3\_754 75.70(10) ?  
 M2b1 M3b2 M2b2 3\_754 . . 180 ?  
 M2b1 M3b2 M2b2 3\_754 . 3\_754 0 ?  
 M2b1 M3b2 M2b3 3\_754 . . 180 ?  
 M2b1 M3b2 M2b3 3\_754 . 3\_754 0 ?  
 M2b1 M3b2 M3b1 3\_754 . . 0 ?  
 M2b1 M3b2 P2b 3\_754 . . 58.06(3) ?  
 M2b1 M3b2 P2b 3\_754 . 3\_754 121.94(3) ?  
 M2b1 M3b2 P1a 3\_754 . 2\_745 58.98(3) ?  
 M2b1 M3b2 P1a 3\_754 . 4\_553 121.02(3) ?  
 M2b1 M3b2 A2b 3\_754 . 2\_754 62.09(3) ?  
 M2b1 M3b2 A2b 3\_754 . 4\_544 117.91(3) ?  
 M2b1 M3b2 X2 3\_754 . . 158.39(11) ?  
 M2b1 M3b2 X2 3\_754 . 3\_754 21.61(11) ?  
 M2b1 M3b2 O3a 3\_754 . 2\_745 76.56(10) ?  
 M2b1 M3b2 O3a 3\_754 . 4\_553 103.44(10) ?  
 M2b1 M3b2 O7b 3\_754 . . 75.70(10) ?  
 M2b1 M3b2 O7b 3\_754 . 3\_754 104.30(10) ?  
 M2b2 M3b2 M2b2 . . 3\_754 180 ?  
 M2b2 M3b2 M2b3 . . . 0 ?  
 M2b2 M3b2 M2b3 . . 3\_754 180 ?  
 M2b2 M3b2 M3b1 . . . 0 ?  
 M2b2 M3b2 P2b . . . 121.94(3) ?  
 M2b2 M3b2 P2b . . 3\_754 58.06(3) ?  
 M2b2 M3b2 P1a . . 2\_745 121.02(3) ?  
 M2b2 M3b2 P1a . . 4\_553 58.98(3) ?  
 M2b2 M3b2 A2b . . 2\_754 117.91(3) ?  
 M2b2 M3b2 A2b . . 4\_544 62.09(3) ?  
 M2b2 M3b2 X2 . . . 21.61(11) ?  
 M2b2 M3b2 X2 . . 3\_754 158.39(11) ?  
 M2b2 M3b2 O3a . . 2\_745 103.44(10) ?  
 M2b2 M3b2 O3a . . 4\_553 76.56(10) ?  
 M2b2 M3b2 O7b . . . 104.30(10) ?  
 M2b2 M3b2 O7b . . 3\_754 75.70(10) ?  
 M2b2 M3b2 M2b3 3\_754 . . 180 ?  
 M2b2 M3b2 M2b3 3\_754 . 3\_754 0 ?

M2b2 M3b2 M3b1 3\_754 . . 0 ?  
M2b2 M3b2 P2b 3\_754 . . 58.06(3) ?  
M2b2 M3b2 P2b 3\_754 . 3\_754 121.94(3) ?  
M2b2 M3b2 P1a 3\_754 . 2\_745 58.98(3) ?  
M2b2 M3b2 P1a 3\_754 . 4\_553 121.02(3) ?  
M2b2 M3b2 A2b 3\_754 . 2\_754 62.09(3) ?  
M2b2 M3b2 A2b 3\_754 . 4\_544 117.91(3) ?  
M2b2 M3b2 X2 3\_754 . . 158.39(11) ?  
M2b2 M3b2 X2 3\_754 . 3\_754 21.61(11) ?  
M2b2 M3b2 O3a 3\_754 . 2\_745 76.56(10) ?  
M2b2 M3b2 O3a 3\_754 . 4\_553 103.44(10) ?  
M2b2 M3b2 O7b 3\_754 . . 75.70(10) ?  
M2b2 M3b2 O7b 3\_754 . 3\_754 104.30(10) ?  
M2b3 M3b2 M2b3 . . 3\_754 180 ?  
M2b3 M3b2 M3b1 . . . 0 ?  
M2b3 M3b2 P2b . . . 121.94(3) ?  
M2b3 M3b2 P2b . . 3\_754 58.06(3) ?  
M2b3 M3b2 P1a . . 2\_745 121.02(3) ?  
M2b3 M3b2 P1a . . 4\_553 58.98(3) ?  
M2b3 M3b2 A2b . . 2\_754 117.91(3) ?  
M2b3 M3b2 A2b . . 4\_544 62.09(3) ?  
M2b3 M3b2 X2 . . . 21.61(11) ?  
M2b3 M3b2 X2 . . 3\_754 158.39(11) ?  
M2b3 M3b2 O3a . . 2\_745 103.44(10) ?  
M2b3 M3b2 O3a . . 4\_553 76.56(10) ?  
M2b3 M3b2 O7b . . . 104.30(10) ?  
M2b3 M3b2 O7b . . 3\_754 75.70(10) ?  
M2b3 M3b2 M3b1 3\_754 . . 0 ?  
M2b3 M3b2 P2b 3\_754 . . 58.06(3) ?  
M2b3 M3b2 P2b 3\_754 . 3\_754 121.94(3) ?  
M2b3 M3b2 P1a 3\_754 . 2\_745 58.98(3) ?  
M2b3 M3b2 P1a 3\_754 . 4\_553 121.02(3) ?  
M2b3 M3b2 A2b 3\_754 . 2\_754 62.09(3) ?  
M2b3 M3b2 A2b 3\_754 . 4\_544 117.91(3) ?  
M2b3 M3b2 X2 3\_754 . . 158.39(11) ?  
M2b3 M3b2 X2 3\_754 . 3\_754 21.61(11) ?  
M2b3 M3b2 O3a 3\_754 . 2\_745 76.56(10) ?  
M2b3 M3b2 O3a 3\_754 . 4\_553 103.44(10) ?  
M2b3 M3b2 O7b 3\_754 . . 75.70(10) ?  
M2b3 M3b2 O7b 3\_754 . 3\_754 104.30(10) ?  
M3b1 M3b2 P2b . . . 0 ?  
M3b1 M3b2 P2b . . 3\_754 0 ?  
M3b1 M3b2 P1a . . 2\_745 0 ?  
M3b1 M3b2 P1a . . 4\_553 0 ?  
M3b1 M3b2 A2b . . 2\_754 0 ?  
M3b1 M3b2 A2b . . 4\_544 0 ?  
M3b1 M3b2 X2 . . . 0 ?  
M3b1 M3b2 X2 . . 3\_754 0 ?  
M3b1 M3b2 O3a . . 2\_745 0 ?  
M3b1 M3b2 O3a . . 4\_553 0 ?  
M3b1 M3b2 O7b . . . 0 ?  
M3b1 M3b2 O7b . . 3\_754 0 ?  
P2b M3b2 P2b . . 3\_754 180 ?  
P2b M3b2 P1a . . 2\_745 71.71(4) ?



P2b M3b2 P1a . . 4\_553 108.29(4) ?  
P2b M3b2 A2b . . 2\_754 117.94(4) ?  
P2b M3b2 A2b . . 4\_544 62.06(4) ?  
P2b M3b2 X2 . . . 104.54(11) ?  
P2b M3b2 X2 . . 3\_754 75.46(11) ?  
P2b M3b2 O3a . . 2\_745 82.43(10) ?  
P2b M3b2 O3a . . 4\_553 97.57(10) ?  
P2b M3b2 O7b . . . 18.07(10) ?  
P2b M3b2 O7b . . 3\_754 161.93(10) ?  
P2b M3b2 P1a 3\_754 . 2\_745 108.29(4) ?  
P2b M3b2 P1a 3\_754 . 4\_553 71.71(4) ?  
P2b M3b2 A2b 3\_754 . 2\_754 62.06(4) ?  
P2b M3b2 A2b 3\_754 . 4\_544 117.94(4) ?  
P2b M3b2 X2 3\_754 . . 75.46(11) ?  
P2b M3b2 X2 3\_754 . 3\_754 104.54(11) ?  
P2b M3b2 O3a 3\_754 . 2\_745 97.57(10) ?  
P2b M3b2 O3a 3\_754 . 4\_553 82.43(10) ?  
P2b M3b2 O7b 3\_754 . . 161.93(10) ?  
P2b M3b2 O7b 3\_754 . 3\_754 18.07(10) ?  
P1a M3b2 P1a 2\_745 . 4\_553 180 ?  
P1a M3b2 A2b 2\_745 . 2\_754 64.86(4) ?  
P1a M3b2 A2b 2\_745 . 4\_544 115.14(4) ?  
P1a M3b2 X2 2\_745 . . 105.33(11) ?  
P1a M3b2 X2 2\_745 . 3\_754 74.67(11) ?  
P1a M3b2 O3a 2\_745 . 2\_745 17.75(10) ?  
P1a M3b2 O3a 2\_745 . 4\_553 162.25(10) ?  
P1a M3b2 O7b 2\_745 . . 83.60(10) ?  
P1a M3b2 O7b 2\_745 . 3\_754 96.40(10) ?  
P1a M3b2 A2b 4\_553 . 2\_754 115.14(4) ?  
P1a M3b2 A2b 4\_553 . 4\_544 64.86(4) ?  
P1a M3b2 X2 4\_553 . . 74.67(11) ?  
P1a M3b2 X2 4\_553 . 3\_754 105.33(11) ?  
P1a M3b2 O3a 4\_553 . 2\_745 162.25(10) ?  
P1a M3b2 O3a 4\_553 . 4\_553 17.75(10) ?  
P1a M3b2 O7b 4\_553 . . 96.40(10) ?  
P1a M3b2 O7b 4\_553 . 3\_754 83.60(10) ?  
A2b M3b2 A2b 2\_754 . 4\_544 180 ?  
A2b M3b2 X2 2\_754 . . 127.80(10) ?  
A2b M3b2 X2 2\_754 . 3\_754 52.20(10) ?  
A2b M3b2 O3a 2\_754 . 2\_745 69.18(10) ?  
A2b M3b2 O3a 2\_754 . 4\_553 110.82(10) ?  
A2b M3b2 O7b 2\_754 . . 135.97(10) ?  
A2b M3b2 O7b 2\_754 . 3\_754 44.03(10) ?  
A2b M3b2 X2 4\_544 . . 52.20(10) ?  
A2b M3b2 X2 4\_544 . 3\_754 127.80(10) ?  
A2b M3b2 O3a 4\_544 . 2\_745 110.82(10) ?  
A2b M3b2 O3a 4\_544 . 4\_553 69.18(10) ?  
A2b M3b2 O7b 4\_544 . . 44.03(10) ?  
A2b M3b2 O7b 4\_544 . 3\_754 135.97(10) ?  
X2 M3b2 X2 . . 3\_754 180 ?  
X2 M3b2 O3a . . 2\_745 89.13(14) ?  
X2 M3b2 O3a . . 4\_553 90.87(14) ?  
X2 M3b2 O7b . . . 88.44(14) ?  
X2 M3b2 O7b . . 3\_754 91.56(14) ?

X2 M3b2 O3a 3\_754 . 2\_745 90.87(14) ?  
X2 M3b2 O3a 3\_754 . 4\_553 89.13(14) ?  
X2 M3b2 O7b 3\_754 . . 91.56(14) ?  
X2 M3b2 O7b 3\_754 . 3\_754 88.44(14) ?  
O3a M3b2 O3a 2\_745 . 4\_553 180 ?  
O3a M3b2 O7b 2\_745 . . 90.22(14) ?  
O3a M3b2 O7b 2\_745 . 3\_754 89.78(14) ?  
O3a M3b2 O7b 4\_553 . . 89.78(14) ?  
O3a M3b2 O7b 4\_553 . 3\_754 90.22(14) ?  
O7b M3b2 O7b . . 3\_754 180 ?  
M1a1 P2a M1a2 . . . 0 ?  
M1a1 P2a M2a1 . . 3\_666 107.47(4) ?  
M1a1 P2a M2a2 . . 3\_666 107.47(4) ?  
M1a1 P2a M2a3 . . 3\_666 107.47(4) ?  
M1a1 P2a M2b1 . . 2\_754 137.20(5) ?  
M1a1 P2a M2b2 . . 2\_754 137.20(5) ?  
M1a1 P2a M2b3 . . 2\_754 137.20(5) ?  
M1a1 P2a M3a1 . . . 126.70(4) ?  
M1a1 P2a M3a2 . . . 126.70(4) ?  
M1a1 P2a A1b . . 4\_565 88.48(6) ?  
M1a1 P2a O5a . . . 21.08(14) ?  
M1a1 P2a O6a . . . 88.98(15) ?  
M1a1 P2a O7a . . . 118.11(15) ?  
M1a1 P2a O8a . . . 119.59(15) ?  
M1a2 P2a M2a1 . . 3\_666 107.47(4) ?  
M1a2 P2a M2a2 . . 3\_666 107.47(4) ?  
M1a2 P2a M2a3 . . 3\_666 107.47(4) ?  
M1a2 P2a M2b1 . . 2\_754 137.20(5) ?  
M1a2 P2a M2b2 . . 2\_754 137.20(5) ?  
M1a2 P2a M2b3 . . 2\_754 137.20(5) ?  
M1a2 P2a M3a1 . . . 126.70(4) ?  
M1a2 P2a M3a2 . . . 126.70(4) ?  
M1a2 P2a A1b . . 4\_565 88.48(6) ?  
M1a2 P2a O5a . . . 21.08(14) ?  
M1a2 P2a O6a . . . 88.98(15) ?  
M1a2 P2a O7a . . . 118.11(15) ?  
M1a2 P2a O8a . . . 119.59(15) ?  
M2a1 P2a M2a2 3\_666 . 3\_666 0 ?  
M2a1 P2a M2a3 3\_666 . 3\_666 0 ?  
M2a1 P2a M2b1 3\_666 . 2\_754 105.37(5) ?  
M2a1 P2a M2b2 3\_666 . 2\_754 105.37(5) ?  
M2a1 P2a M2b3 3\_666 . 2\_754 105.37(5) ?  
M2a1 P2a M3a1 3\_666 . . 63.93(4) ?  
M2a1 P2a M3a2 3\_666 . . 63.93(4) ?  
M2a1 P2a A1b 3\_666 . 4\_565 127.16(7) ?  
M2a1 P2a O5a 3\_666 . . 128.34(15) ?  
M2a1 P2a O6a 3\_666 . . 24.19(14) ?  
M2a1 P2a O7a 3\_666 . . 86.82(14) ?  
M2a1 P2a O8a 3\_666 . . 111.40(15) ?  
M2a2 P2a M2a3 3\_666 . 3\_666 0 ?  
M2a2 P2a M2b1 3\_666 . 2\_754 105.37(5) ?  
M2a2 P2a M2b2 3\_666 . 2\_754 105.37(5) ?  
M2a2 P2a M2b3 3\_666 . 2\_754 105.37(5) ?  
M2a2 P2a M3a1 3\_666 . . 63.93(4) ?

M2a2 P2a M3a2 3\_666 . . 63.93(4) ?  
M2a2 P2a A1b 3\_666 . 4\_565 127.16(7) ?  
M2a2 P2a O5a 3\_666 . . 128.34(15) ?  
M2a2 P2a O6a 3\_666 . . 24.19(14) ?  
M2a2 P2a O7a 3\_666 . . 86.82(14) ?  
M2a2 P2a O8a 3\_666 . . 111.40(15) ?  
M2a3 P2a M2b1 3\_666 . 2\_754 105.37(5) ?  
M2a3 P2a M2b2 3\_666 . 2\_754 105.37(5) ?  
M2a3 P2a M2b3 3\_666 . 2\_754 105.37(5) ?  
M2a3 P2a M3a1 3\_666 . . 63.93(4) ?  
M2a3 P2a M3a2 3\_666 . . 63.93(4) ?  
M2a3 P2a A1b 3\_666 . 4\_565 127.16(7) ?  
M2a3 P2a O5a 3\_666 . . 128.34(15) ?  
M2a3 P2a O6a 3\_666 . . 24.19(14) ?  
M2a3 P2a O7a 3\_666 . . 86.82(14) ?  
M2a3 P2a O8a 3\_666 . . 111.40(15) ?  
M2b1 P2a M2b2 2\_754 . 2\_754 0 ?  
M2b1 P2a M2b3 2\_754 . 2\_754 0 ?  
M2b1 P2a M3a1 2\_754 . . 92.27(4) ?  
M2b1 P2a M3a2 2\_754 . . 92.27(4) ?  
M2b1 P2a A1b 2\_754 . 4\_565 93.02(6) ?  
M2b1 P2a O5a 2\_754 . . 121.60(15) ?  
M2b1 P2a O6a 2\_754 . . 112.31(15) ?  
M2b1 P2a O7a 2\_754 . . 90.19(14) ?  
M2b1 P2a O8a 2\_754 . . 19.32(13) ?  
M2b2 P2a M2b3 2\_754 . 2\_754 0 ?  
M2b2 P2a M3a1 2\_754 . . 92.27(4) ?  
M2b2 P2a M3a2 2\_754 . . 92.27(4) ?  
M2b2 P2a A1b 2\_754 . 4\_565 93.02(6) ?  
M2b2 P2a O5a 2\_754 . . 121.60(15) ?  
M2b2 P2a O6a 2\_754 . . 112.31(15) ?  
M2b2 P2a O7a 2\_754 . . 90.19(14) ?  
M2b2 P2a O8a 2\_754 . . 19.32(13) ?  
M2b3 P2a M3a1 2\_754 . . 92.27(4) ?  
M2b3 P2a M3a2 2\_754 . . 92.27(4) ?  
M2b3 P2a A1b 2\_754 . 4\_565 93.02(6) ?  
M2b3 P2a O5a 2\_754 . . 121.60(15) ?  
M2b3 P2a O6a 2\_754 . . 112.31(15) ?  
M2b3 P2a O7a 2\_754 . . 90.19(14) ?  
M2b3 P2a O8a 2\_754 . . 19.32(13) ?  
M3a1 P2a M3a2 . . . 0 ?  
M3a1 P2a A1b . . 4\_565 66.29(6) ?  
M3a1 P2a O5a . . . 128.31(15) ?  
M3a1 P2a O6a . . . 87.37(14) ?  
M3a1 P2a O7a . . . 23.28(13) ?  
M3a1 P2a O8a . . . 111.51(15) ?  
M3a2 P2a A1b . . 4\_565 66.29(6) ?  
M3a2 P2a O5a . . . 128.31(15) ?  
M3a2 P2a O6a . . . 87.37(14) ?  
M3a2 P2a O7a . . . 23.28(13) ?  
M3a2 P2a O8a . . . 111.51(15) ?  
A1b P2a O5a 4\_565 . . 73.52(15) ?  
A1b P2a O6a 4\_565 . . 144.44(15) ?  
A1b P2a O7a 4\_565 . . 43.24(15) ?

A1b P2a O8a 4\_565 . . 102.12(14) ?  
O5a P2a O6a . . . 109.8(2) ?  
O5a P2a O7a . . . 111.5(2) ?  
O5a P2a O8a . . . 107.5(2) ?  
O6a P2a O7a . . . 109.5(2) ?  
O6a P2a O8a . . . 109.9(2) ?  
O7a P2a O8a . . . 108.6(2) ?  
M1b1 P2b M1b2 . . . 0 ?  
M1b1 P2b M2a1 . . 2\_745 137.33(5) ?  
M1b1 P2b M2a2 . . 2\_745 137.33(5) ?  
M1b1 P2b M2a3 . . 2\_745 137.33(5) ?  
M1b1 P2b M2b1 . . 3\_754 107.41(4) ?  
M1b1 P2b M2b2 . . 3\_754 107.41(4) ?  
M1b1 P2b M2b3 . . 3\_754 107.41(4) ?  
M1b1 P2b M3b1 . . . 127.51(4) ?  
M1b1 P2b M3b2 . . . 127.51(4) ?  
M1b1 P2b A2b . . 4\_544 89.63(4) ?  
M1b1 P2b O5b . . . 21.46(13) ?  
M1b1 P2b O6b . . . 88.47(15) ?  
M1b1 P2b O7b . . . 117.96(15) ?  
M1b1 P2b O8b . . . 119.38(15) ?  
M1b2 P2b M2a1 . . 2\_745 137.33(5) ?  
M1b2 P2b M2a2 . . 2\_745 137.33(5) ?  
M1b2 P2b M2a3 . . 2\_745 137.33(5) ?  
M1b2 P2b M2b1 . . 3\_754 107.41(4) ?  
M1b2 P2b M2b2 . . 3\_754 107.41(4) ?  
M1b2 P2b M2b3 . . 3\_754 107.41(4) ?  
M1b2 P2b M3b1 . . . 127.51(4) ?  
M1b2 P2b M3b2 . . . 127.51(4) ?  
M1b2 P2b A2b . . 4\_544 89.63(4) ?  
M1b2 P2b O5b . . . 21.46(13) ?  
M1b2 P2b O6b . . . 88.47(15) ?  
M1b2 P2b O7b . . . 117.96(15) ?  
M1b2 P2b O8b . . . 119.38(15) ?  
M2a1 P2b M2a2 2\_745 . 2\_745 0 ?  
M2a1 P2b M2a3 2\_745 . 2\_745 0 ?  
M2a1 P2b M2b1 2\_745 . 3\_754 105.32(5) ?  
M2a1 P2b M2b2 2\_745 . 3\_754 105.32(5) ?  
M2a1 P2b M2b3 2\_745 . 3\_754 105.32(5) ?  
M2a1 P2b M3b1 2\_745 . . 91.43(4) ?  
M2a1 P2b M3b2 2\_745 . . 91.43(4) ?  
M2a1 P2b A2b 2\_745 . 4\_544 91.37(5) ?  
M2a1 P2b O5b 2\_745 . . 121.85(14) ?  
M2a1 P2b O6b 2\_745 . . 112.78(15) ?  
M2a1 P2b O7b 2\_745 . . 90.20(14) ?  
M2a1 P2b O8b 2\_745 . . 19.59(13) ?  
M2a2 P2b M2a3 2\_745 . 2\_745 0 ?  
M2a2 P2b M2b1 2\_745 . 3\_754 105.32(5) ?  
M2a2 P2b M2b2 2\_745 . 3\_754 105.32(5) ?  
M2a2 P2b M2b3 2\_745 . 3\_754 105.32(5) ?  
M2a2 P2b M3b1 2\_745 . . 91.43(4) ?  
M2a2 P2b M3b2 2\_745 . . 91.43(4) ?  
M2a2 P2b A2b 2\_745 . 4\_544 91.37(5) ?  
M2a2 P2b O5b 2\_745 . . 121.85(14) ?

M2a2 P2b 06b 2\_745 . . 112.78(15) ?  
M2a2 P2b 07b 2\_745 . . 90.20(14) ?  
M2a2 P2b 08b 2\_745 . . 19.59(13) ?  
M2a3 P2b M2b1 2\_745 . 3\_754 105.32(5) ?  
M2a3 P2b M2b2 2\_745 . 3\_754 105.32(5) ?  
M2a3 P2b M2b3 2\_745 . 3\_754 105.32(5) ?  
M2a3 P2b M3b1 2\_745 . . 91.43(4) ?  
M2a3 P2b M3b2 2\_745 . . 91.43(4) ?  
M2a3 P2b A2b 2\_745 . 4\_544 91.37(5) ?  
M2a3 P2b 05b 2\_745 . . 121.85(14) ?  
M2a3 P2b 06b 2\_745 . . 112.78(15) ?  
M2a3 P2b 07b 2\_745 . . 90.20(14) ?  
M2a3 P2b 08b 2\_745 . . 19.59(13) ?  
M2b1 P2b M2b2 3\_754 . 3\_754 0 ?  
M2b1 P2b M2b3 3\_754 . 3\_754 0 ?  
M2b1 P2b M3b1 3\_754 . . 63.82(4) ?  
M2b1 P2b M3b2 3\_754 . . 63.82(4) ?  
M2b1 P2b A2b 3\_754 . 4\_544 127.87(5) ?  
M2b1 P2b 05b 3\_754 . . 128.53(15) ?  
M2b1 P2b 06b 3\_754 . . 24.41(13) ?  
M2b1 P2b 07b 3\_754 . . 86.96(14) ?  
M2b1 P2b 08b 3\_754 . . 111.65(15) ?  
M2b2 P2b M2b3 3\_754 . 3\_754 0 ?  
M2b2 P2b M3b1 3\_754 . . 63.82(4) ?  
M2b2 P2b M3b2 3\_754 . . 63.82(4) ?  
M2b2 P2b A2b 3\_754 . 4\_544 127.87(5) ?  
M2b2 P2b 05b 3\_754 . . 128.53(15) ?  
M2b2 P2b 06b 3\_754 . . 24.41(13) ?  
M2b2 P2b 07b 3\_754 . . 86.96(14) ?  
M2b2 P2b 08b 3\_754 . . 111.65(15) ?  
M2b3 P2b M3b1 3\_754 . . 63.82(4) ?  
M2b3 P2b M3b2 3\_754 . . 63.82(4) ?  
M2b3 P2b A2b 3\_754 . 4\_544 127.87(5) ?  
M2b3 P2b 05b 3\_754 . . 128.53(15) ?  
M2b3 P2b 06b 3\_754 . . 24.41(13) ?  
M2b3 P2b 07b 3\_754 . . 86.96(14) ?  
M2b3 P2b 08b 3\_754 . . 111.65(15) ?  
M3b1 P2b M3b2 . . . 0 ?  
M3b1 P2b A2b . . 4\_544 66.81(4) ?  
M3b1 P2b 05b . . . 128.34(14) ?  
M3b1 P2b 06b . . . 87.46(14) ?  
M3b1 P2b 07b . . . 23.73(13) ?  
M3b1 P2b 08b . . . 110.94(15) ?  
M3b2 P2b A2b . . 4\_544 66.81(4) ?  
M3b2 P2b 05b . . . 128.34(14) ?  
M3b2 P2b 06b . . . 87.46(14) ?  
M3b2 P2b 07b . . . 23.73(13) ?  
M3b2 P2b 08b . . . 110.94(15) ?  
A2b P2b 05b 4\_544 . . 73.55(14) ?  
A2b P2b 06b 4\_544 . . 145.47(14) ?  
A2b P2b 07b 4\_544 . . 43.14(14) ?  
A2b P2b 08b 4\_544 . . 100.42(14) ?  
05b P2b 06b . . . 109.8(2) ?  
05b P2b 07b . . . 110.6(2) ?

O5b P2b O8b . . . 107.6(2) ?  
 O6b P2b O7b . . . 109.70(19) ?  
 O6b P2b O8b . . . 110.5(2) ?  
 O7b P2b O8b . . . 108.7(2) ?  
 M1b1 P1a M1b2 1\_566 . 1\_566 0 ?  
 M1b1 P1a M2a1 1\_566 . . 137.42(5) ?  
 M1b1 P1a M2a2 1\_566 . . 137.42(5) ?  
 M1b1 P1a M2a3 1\_566 . . 137.42(5) ?  
 M1b1 P1a M2b1 1\_566 . 4\_556 107.50(4) ?  
 M1b1 P1a M2b2 1\_566 . 4\_556 107.50(4) ?  
 M1b1 P1a M2b3 1\_566 . 4\_556 107.50(4) ?  
 M1b1 P1a M3b1 1\_566 . 2\_755 127.24(4) ?  
 M1b1 P1a M3b2 1\_566 . 2\_755 127.24(4) ?  
 M1b1 P1a A1b 1\_566 . 4\_565 75.57(6) ?  
 M1b1 P1a A2b 1\_566 . 1\_566 65.47(4) ?  
 M1b1 P1a O1a 1\_566 . . 20.64(13) ?  
 M1b1 P1a O2a 1\_566 . . 89.69(15) ?  
 M1b1 P1a O3a 1\_566 . . 119.83(15) ?  
 M1b1 P1a O4a 1\_566 . . 117.02(15) ?  
 M1b2 P1a M2a1 1\_566 . . 137.42(5) ?  
 M1b2 P1a M2a2 1\_566 . . 137.42(5) ?  
 M1b2 P1a M2a3 1\_566 . . 137.42(5) ?  
 M1b2 P1a M2b1 1\_566 . 4\_556 107.50(4) ?  
 M1b2 P1a M2b2 1\_566 . 4\_556 107.50(4) ?  
 M1b2 P1a M2b3 1\_566 . 4\_556 107.50(4) ?  
 M1b2 P1a M3b1 1\_566 . 2\_755 127.24(4) ?  
 M1b2 P1a M3b2 1\_566 . 2\_755 127.24(4) ?  
 M1b2 P1a A1b 1\_566 . 4\_565 75.57(6) ?  
 M1b2 P1a A2b 1\_566 . 1\_566 65.47(4) ?  
 M1b2 P1a O1a 1\_566 . . 20.64(13) ?  
 M1b2 P1a O2a 1\_566 . . 89.69(15) ?  
 M1b2 P1a O3a 1\_566 . . 119.83(15) ?  
 M1b2 P1a O4a 1\_566 . . 117.02(15) ?  
 M2a1 P1a M2a2 . . . 0 ?  
 M2a1 P1a M2a3 . . . 0 ?  
 M2a1 P1a M2b1 . . 4\_556 105.06(5) ?  
 M2a1 P1a M2b2 . . 4\_556 105.06(5) ?  
 M2a1 P1a M2b3 . . 4\_556 105.06(5) ?  
 M2a1 P1a M3b1 . . 2\_755 91.90(4) ?  
 M2a1 P1a M3b2 . . 2\_755 91.90(4) ?  
 M2a1 P1a A1b . . 4\_565 65.35(6) ?  
 M2a1 P1a A2b . . 1\_566 156.53(5) ?  
 M2a1 P1a O1a . . . 124.73(14) ?  
 M2a1 P1a O2a . . . 110.84(15) ?  
 M2a1 P1a O3a . . . 88.78(14) ?  
 M2a1 P1a O4a . . . 21.59(13) ?  
 M2a2 P1a M2a3 . . . 0 ?  
 M2a2 P1a M2b1 . . 4\_556 105.06(5) ?  
 M2a2 P1a M2b2 . . 4\_556 105.06(5) ?  
 M2a2 P1a M2b3 . . 4\_556 105.06(5) ?  
 M2a2 P1a M3b1 . . 2\_755 91.90(4) ?  
 M2a2 P1a M3b2 . . 2\_755 91.90(4) ?  
 M2a2 P1a A1b . . 4\_565 65.35(6) ?  
 M2a2 P1a A2b . . 1\_566 156.53(5) ?

M2a2 P1a O1a . . . 124.73(14) ?  
M2a2 P1a O2a . . . 110.84(15) ?  
M2a2 P1a O3a . . . 88.78(14) ?  
M2a2 P1a O4a . . . 21.59(13) ?  
M2a3 P1a M2b1 . . 4\_556 105.06(5) ?  
M2a3 P1a M2b2 . . 4\_556 105.06(5) ?  
M2a3 P1a M2b3 . . 4\_556 105.06(5) ?  
M2a3 P1a M3b1 . . 2\_755 91.90(4) ?  
M2a3 P1a M3b2 . . 2\_755 91.90(4) ?  
M2a3 P1a A1b . . 4\_565 65.35(6) ?  
M2a3 P1a A2b . . 1\_566 156.53(5) ?  
M2a3 P1a O1a . . . 124.73(14) ?  
M2a3 P1a O2a . . . 110.84(15) ?  
M2a3 P1a O3a . . . 88.78(14) ?  
M2a3 P1a O4a . . . 21.59(13) ?  
M2b1 P1a M2b2 4\_556 . 4\_556 0 ?  
M2b1 P1a M2b3 4\_556 . 4\_556 0 ?  
M2b1 P1a M3b1 4\_556 . 2\_755 63.06(4) ?  
M2b1 P1a M3b2 4\_556 . 2\_755 63.06(4) ?  
M2b1 P1a A1b 4\_556 . 4\_565 117.37(6) ?  
M2b1 P1a A2b 4\_556 . 1\_566 63.13(4) ?  
M2b1 P1a O1a 4\_556 . . 126.93(15) ?  
M2b1 P1a O2a 4\_556 . . 24.37(13) ?  
M2b1 P1a O3a 4\_556 . . 86.21(14) ?  
M2b1 P1a O4a 4\_556 . . 113.61(15) ?  
M2b2 P1a M2b3 4\_556 . 4\_556 0 ?  
M2b2 P1a M3b1 4\_556 . 2\_755 63.06(4) ?  
M2b2 P1a M3b2 4\_556 . 2\_755 63.06(4) ?  
M2b2 P1a A1b 4\_556 . 4\_565 117.37(6) ?  
M2b2 P1a A2b 4\_556 . 1\_566 63.13(4) ?  
M2b2 P1a O1a 4\_556 . . 126.93(15) ?  
M2b2 P1a O2a 4\_556 . . 24.37(13) ?  
M2b2 P1a O3a 4\_556 . . 86.21(14) ?  
M2b2 P1a O4a 4\_556 . . 113.61(15) ?  
M2b3 P1a M3b1 4\_556 . 2\_755 63.06(4) ?  
M2b3 P1a M3b2 4\_556 . 2\_755 63.06(4) ?  
M2b3 P1a A1b 4\_556 . 4\_565 117.37(6) ?  
M2b3 P1a A2b 4\_556 . 1\_566 63.13(4) ?  
M2b3 P1a O1a 4\_556 . . 126.93(15) ?  
M2b3 P1a O2a 4\_556 . . 24.37(13) ?  
M2b3 P1a O3a 4\_556 . . 86.21(14) ?  
M2b3 P1a O4a 4\_556 . . 113.61(15) ?  
M3b1 P1a M3b2 2\_755 . 2\_755 0 ?  
M3b1 P1a A1b 2\_755 . 4\_565 156.96(7) ?  
M3b1 P1a A2b 2\_755 . 1\_566 64.78(4) ?  
M3b1 P1a O1a 2\_755 . . 125.42(14) ?  
M3b1 P1a O2a 2\_755 . . 86.99(14) ?  
M3b1 P1a O3a 2\_755 . . 23.37(13) ?  
M3b1 P1a O4a 2\_755 . . 113.49(15) ?  
M3b2 P1a A1b 2\_755 . 4\_565 156.96(7) ?  
M3b2 P1a A2b 2\_755 . 1\_566 64.78(4) ?  
M3b2 P1a O1a 2\_755 . . 125.42(14) ?  
M3b2 P1a O2a 2\_755 . . 86.99(14) ?  
M3b2 P1a O3a 2\_755 . . 23.37(13) ?

M3b2 P1a O4a 2\_755 . . 113.49(15) ?  
A1b P1a A2b 4\_565 . 1\_566 137.64(7) ?  
A1b P1a O1a 4\_565 . . 74.26(15) ?  
A1b P1a O2a 4\_565 . . 97.40(14) ?  
A1b P1a O3a 4\_565 . . 148.05(15) ?  
A1b P1a O4a 4\_565 . . 43.80(14) ?  
A2b P1a O1a 1\_566 . . 74.88(14) ?  
A2b P1a O2a 1\_566 . . 67.45(13) ?  
A2b P1a O3a 1\_566 . . 70.91(13) ?  
A2b P1a O4a 1\_566 . . 176.66(15) ?  
O1a P1a O2a . . . 110.3(2) ?  
O1a P1a O3a . . . 109.9(2) ?  
O1a P1a O4a . . . 108.2(2) ?  
O2a P1a O3a . . . 109.71(19) ?  
O2a P1a O4a . . . 109.91(19) ?  
O3a P1a O4a . . . 108.70(19) ?  
M1a1 P1b M1a2 1\_644 . 1\_644 0 ?  
M1a1 P1b M2a1 1\_644 . 4\_653 107.79(4) ?  
M1a1 P1b M2a2 1\_644 . 4\_653 107.79(4) ?  
M1a1 P1b M2a3 1\_644 . 4\_653 107.79(4) ?  
M1a1 P1b M2b1 1\_644 . . 135.85(5) ?  
M1a1 P1b M2b2 1\_644 . . 135.85(5) ?  
M1a1 P1b M2b3 1\_644 . . 135.85(5) ?  
M1a1 P1b M3a1 1\_644 . 2\_744 128.18(4) ?  
M1a1 P1b M3a2 1\_644 . 2\_744 128.18(4) ?  
M1a1 P1b A1b 1\_644 . 1\_644 65.69(6) ?  
M1a1 P1b A2b 1\_644 . 4\_544 74.84(4) ?  
M1a1 P1b O1b 1\_644 . . 19.89(14) ?  
M1a1 P1b O2b 1\_644 . . 89.90(15) ?  
M1a1 P1b O3b 1\_644 . . 119.54(15) ?  
M1a1 P1b O4b 1\_644 . . 117.04(15) ?  
M1a2 P1b M2a1 1\_644 . 4\_653 107.79(4) ?  
M1a2 P1b M2a2 1\_644 . 4\_653 107.79(4) ?  
M1a2 P1b M2a3 1\_644 . 4\_653 107.79(4) ?  
M1a2 P1b M2b1 1\_644 . . 135.85(5) ?  
M1a2 P1b M2b2 1\_644 . . 135.85(5) ?  
M1a2 P1b M2b3 1\_644 . . 135.85(5) ?  
M1a2 P1b M3a1 1\_644 . 2\_744 128.18(4) ?  
M1a2 P1b M3a2 1\_644 . 2\_744 128.18(4) ?  
M1a2 P1b A1b 1\_644 . 1\_644 65.69(6) ?  
M1a2 P1b A2b 1\_644 . 4\_544 74.84(4) ?  
M1a2 P1b O1b 1\_644 . . 19.89(14) ?  
M1a2 P1b O2b 1\_644 . . 89.90(15) ?  
M1a2 P1b O3b 1\_644 . . 119.54(15) ?  
M1a2 P1b O4b 1\_644 . . 117.04(15) ?  
M2a1 P1b M2a2 4\_653 . 4\_653 0 ?  
M2a1 P1b M2a3 4\_653 . 4\_653 0 ?  
M2a1 P1b M2b1 4\_653 . . 104.85(5) ?  
M2a1 P1b M2b2 4\_653 . . 104.85(5) ?  
M2a1 P1b M2b3 4\_653 . . 104.85(5) ?  
M2a1 P1b M3a1 4\_653 . 2\_744 63.61(4) ?  
M2a1 P1b M3a2 4\_653 . 2\_744 63.61(4) ?  
M2a1 P1b A1b 4\_653 . 1\_644 64.18(6) ?  
M2a1 P1b A2b 4\_653 . 4\_544 115.80(5) ?



M2a1 P1b O1b 4\_653 . . 126.93(15) ?  
M2a1 P1b O2b 4\_653 . . 24.46(14) ?  
M2a1 P1b O3b 4\_653 . . 86.51(14) ?  
M2a1 P1b O4b 4\_653 . . 113.11(15) ?  
M2a2 P1b M2a3 4\_653 . 4\_653 0 ?  
M2a2 P1b M2b1 4\_653 . . 104.85(5) ?  
M2a2 P1b M2b2 4\_653 . . 104.85(5) ?  
M2a2 P1b M2b3 4\_653 . . 104.85(5) ?  
M2a2 P1b M3a1 4\_653 . 2\_744 63.61(4) ?  
M2a2 P1b M3a2 4\_653 . 2\_744 63.61(4) ?  
M2a2 P1b A1b 4\_653 . 1\_644 64.18(6) ?  
M2a2 P1b A2b 4\_653 . 4\_544 115.80(5) ?  
M2a2 P1b O1b 4\_653 . . 126.93(15) ?  
M2a2 P1b O2b 4\_653 . . 24.46(14) ?  
M2a2 P1b O3b 4\_653 . . 86.51(14) ?  
M2a2 P1b O4b 4\_653 . . 113.11(15) ?  
M2a3 P1b M2b1 4\_653 . . 104.85(5) ?  
M2a3 P1b M2b2 4\_653 . . 104.85(5) ?  
M2a3 P1b M2b3 4\_653 . . 104.85(5) ?  
M2a3 P1b M3a1 4\_653 . 2\_744 63.61(4) ?  
M2a3 P1b M3a2 4\_653 . 2\_744 63.61(4) ?  
M2a3 P1b A1b 4\_653 . 1\_644 64.18(6) ?  
M2a3 P1b A2b 4\_653 . 4\_544 115.80(5) ?  
M2a3 P1b O1b 4\_653 . . 126.93(15) ?  
M2a3 P1b O2b 4\_653 . . 24.46(14) ?  
M2a3 P1b O3b 4\_653 . . 86.51(14) ?  
M2a3 P1b O4b 4\_653 . . 113.11(15) ?  
M2b1 P1b M2b2 . . . 0 ?  
M2b1 P1b M2b3 . . . 0 ?  
M2b1 P1b M3a1 . . 2\_744 92.83(4) ?  
M2b1 P1b M3a2 . . 2\_744 92.83(4) ?  
M2b1 P1b A1b . . 1\_644 158.01(7) ?  
M2b1 P1b A2b . . 4\_544 64.47(4) ?  
M2b1 P1b O1b . . . 123.49(15) ?  
M2b1 P1b O2b . . . 109.72(15) ?  
M2b1 P1b O3b . . . 91.09(14) ?  
M2b1 P1b O4b . . . 19.61(14) ?  
M2b2 P1b M2b3 . . . 0 ?  
M2b2 P1b M3a1 . . 2\_744 92.83(4) ?  
M2b2 P1b M3a2 . . 2\_744 92.83(4) ?  
M2b2 P1b A1b . . 1\_644 158.01(7) ?  
M2b2 P1b A2b . . 4\_544 64.47(4) ?  
M2b2 P1b O1b . . . 123.49(15) ?  
M2b2 P1b O2b . . . 109.72(15) ?  
M2b2 P1b O3b . . . 91.09(14) ?  
M2b2 P1b O4b . . . 19.61(14) ?  
M2b3 P1b M3a1 . . 2\_744 92.83(4) ?  
M2b3 P1b M3a2 . . 2\_744 92.83(4) ?  
M2b3 P1b A1b . . 1\_644 158.01(7) ?  
M2b3 P1b A2b . . 4\_544 64.47(4) ?  
M2b3 P1b O1b . . . 123.49(15) ?  
M2b3 P1b O2b . . . 109.72(15) ?  
M2b3 P1b O3b . . . 91.09(14) ?  
M2b3 P1b O4b . . . 19.61(14) ?

M3a1 P1b M3a2 2\_744 . 2\_744 0 ?  
M3a1 P1b A1b 2\_744 . 1\_644 65.34(6) ?  
M3a1 P1b A2b 2\_744 . 4\_544 156.85(5) ?  
M3a1 P1b O1b 2\_744 . . 127.33(15) ?  
M3a1 P1b O2b 2\_744 . . 87.68(14) ?  
M3a1 P1b O3b 2\_744 . . 23.31(14) ?  
M3a1 P1b O4b 2\_744 . . 112.43(15) ?  
M3a2 P1b A1b 2\_744 . 1\_644 65.34(6) ?  
M3a2 P1b A2b 2\_744 . 4\_544 156.85(5) ?  
M3a2 P1b O1b 2\_744 . . 127.33(15) ?  
M3a2 P1b O2b 2\_744 . . 87.68(14) ?  
M3a2 P1b O3b 2\_744 . . 23.31(14) ?  
M3a2 P1b O4b 2\_744 . . 112.43(15) ?  
A1b P1b A2b 1\_644 . 4\_544 136.96(7) ?  
A1b P1b O1b 1\_644 . . 75.38(15) ?  
A1b P1b O2b 1\_644 . . 68.77(14) ?  
A1b P1b O3b 1\_644 . . 69.98(15) ?  
A1b P1b O4b 1\_644 . . 176.95(16) ?  
A2b P1b O1b 4\_544 . . 72.99(15) ?  
A2b P1b O2b 4\_544 . . 95.56(14) ?  
A2b P1b O3b 4\_544 . . 149.72(14) ?  
A2b P1b O4b 4\_544 . . 44.99(14) ?  
O1b P1b O2b . . . 109.8(2) ?  
O1b P1b O3b . . . 111.0(2) ?  
O1b P1b O4b . . . 107.6(2) ?  
O2b P1b O3b . . . 110.1(2) ?  
O2b P1b O4b . . . 109.4(2) ?  
O3b P1b O4b . . . 108.9(2) ?  
M1a1 A1b M1a1 . . 4\_564 87.27(6) ?  
M1a1 A1b M1b1 . . 1\_565 122.96(8) ?  
M1a1 A1b M1b1 . . 4\_555 78.73(6) ?  
M1a1 A1b M1a2 . . . 0 ?  
M1a1 A1b M1a2 . . 4\_564 87.27(6) ?  
M1a1 A1b M1b2 . . 1\_565 122.96(8) ?  
M1a1 A1b M1b2 . . 4\_555 78.73(6) ?  
M1a1 A1b M2a1 . . 4\_564 89.08(7) ?  
M1a1 A1b M2a2 . . 4\_564 89.08(7) ?  
M1a1 A1b M2a3 . . 4\_564 89.08(7) ?  
M1a1 A1b M2b1 . . 3\_764 157.70(8) ?  
M1a1 A1b M2b2 . . 3\_764 157.70(8) ?  
M1a1 A1b M2b3 . . 3\_764 157.70(8) ?  
M1a1 A1b M3a1 . . 2\_655 101.07(7) ?  
M1a1 A1b M3a2 . . 2\_655 101.07(7) ?  
M1a1 A1b P2a . . 4\_564 117.78(8) ?  
M1a1 A1b P1a . . 4\_564 90.64(7) ?  
M1a1 A1b P1b . . 1\_466 52.06(5) ?  
M1a1 A1b A1a . . . 0 ?  
M1a1 A1b A2b . . 1\_465 48.09(4) ?  
M1a1 A1b A2b . . 1\_565 104.20(7) ?  
M1a1 A1b X1 . . 4\_564 106.93(11) ?  
M1a1 A1b O1a . . 4\_564 76.62(8) ?  
M1a1 A1b O1b . . 1\_466 30.74(7) ?  
M1a1 A1b O2b . . 1\_466 59.41(8) ?  
M1a1 A1b O3b . . 1\_466 70.70(8) ?

M1a1 A1b O4a . . 4\_564 89.38(10) ?  
M1a1 A1b O5a . . 4\_564 106.08(10) ?  
M1a1 A1b O7a . . 4\_564 114.17(11) ?  
M1a1 A1b O9b . . 1\_565 128.63(12) ?  
M1a1 A1b O10a . . . 32.30(9) ?  
M1a1 A1b O11a . . . 32.82(7) ?  
M1a1 A1b O12b . . 4\_555 86.70(11) ?  
M1a1 A1b O13b . . 3\_764 158.38(11) ?  
M1a1 A1b O15b . . 3\_764 149.11(13) ?  
M1a1 A1b M1b1 4\_564 . 1\_565 62.42(4) ?  
M1a1 A1b M1b1 4\_564 . 4\_555 122.86(7) ?  
M1a1 A1b M1a2 4\_564 . . 87.27(6) ?  
M1a1 A1b M1a2 4\_564 . 4\_564 0 ?  
M1a1 A1b M1b2 4\_564 . 1\_565 62.42(4) ?  
M1a1 A1b M1b2 4\_564 . 4\_555 122.86(7) ?  
M1a1 A1b M2a1 4\_564 . 4\_564 136.29(8) ?  
M1a1 A1b M2a2 4\_564 . 4\_564 136.29(8) ?  
M1a1 A1b M2a3 4\_564 . 4\_564 136.29(8) ?  
M1a1 A1b M2b1 4\_564 . 3\_764 76.66(5) ?  
M1a1 A1b M2b2 4\_564 . 3\_764 76.66(5) ?  
M1a1 A1b M2b3 4\_564 . 3\_764 76.66(5) ?  
M1a1 A1b M3a1 4\_564 . 2\_655 84.14(6) ?  
M1a1 A1b M3a2 4\_564 . 2\_655 84.14(6) ?  
M1a1 A1b P2a 4\_564 . 4\_564 42.94(4) ?  
M1a1 A1b P1a 4\_564 . 4\_564 171.56(9) ?  
M1a1 A1b P1b 4\_564 . 1\_466 93.98(7) ?  
M1a1 A1b A1a 4\_564 . . 0 ?  
M1a1 A1b A2b 4\_564 . 1\_465 39.34(3) ?  
M1a1 A1b A2b 4\_564 . 1\_565 86.62(5) ?  
M1a1 A1b X1 4\_564 . 4\_564 112.90(10) ?  
M1a1 A1b O1a 4\_564 . 4\_564 148.37(11) ?  
M1a1 A1b O1b 4\_564 . 1\_466 84.12(8) ?  
M1a1 A1b O2b 4\_564 . 1\_466 117.49(9) ?  
M1a1 A1b O3b 4\_564 . 1\_466 80.29(8) ?  
M1a1 A1b O4a 4\_564 . 4\_564 165.75(12) ?  
M1a1 A1b O5a 4\_564 . 4\_564 20.91(7) ?  
M1a1 A1b O7a 4\_564 . 4\_564 60.10(9) ?  
M1a1 A1b O9b 4\_564 . 1\_565 53.11(8) ?  
M1a1 A1b O10a 4\_564 . . 58.99(10) ?  
M1a1 A1b O11a 4\_564 . . 120.01(10) ?  
M1a1 A1b O12b 4\_564 . 4\_555 98.06(11) ?  
M1a1 A1b O13b 4\_564 . 3\_764 96.89(9) ?  
M1a1 A1b O15b 4\_564 . 3\_764 114.43(11) ?  
M1b1 A1b M1b1 1\_565 . 4\_555 79.90(6) ?  
M1b1 A1b M1a2 1\_565 . . 122.96(8) ?  
M1b1 A1b M1a2 1\_565 . 4\_564 62.42(4) ?  
M1b1 A1b M1b2 1\_565 . 1\_565 0 ?  
M1b1 A1b M1b2 1\_565 . 4\_555 79.90(6) ?  
M1b1 A1b M2a1 1\_565 . 4\_564 146.40(8) ?  
M1b1 A1b M2a2 1\_565 . 4\_564 146.40(8) ?  
M1b1 A1b M2a3 1\_565 . 4\_564 146.40(8) ?  
M1b1 A1b M2b1 1\_565 . 3\_764 62.61(4) ?  
M1b1 A1b M2b2 1\_565 . 3\_764 62.61(4) ?  
M1b1 A1b M2b3 1\_565 . 3\_764 62.61(4) ?

## paulkerrite.cif

M1b1 A1b M3a1 1\_565 . 2\_655 120.36(7) ?  
M1b1 A1b M3a2 1\_565 . 2\_655 120.36(7) ?  
M1b1 A1b P2a 1\_565 . 4\_564 72.01(6) ?  
M1b1 A1b P1a 1\_565 . 4\_564 112.42(7) ?  
M1b1 A1b P1b 1\_565 . 1\_466 156.36(8) ?  
M1b1 A1b A1a 1\_565 . . 0 ?  
M1b1 A1b A2b 1\_565 . 1\_465 92.00(5) ?  
M1b1 A1b A2b 1\_565 . 1\_565 34.20(3) ?  
M1b1 A1b X1 1\_565 . 4\_564 128.68(11) ?  
M1b1 A1b O1a 1\_565 . 4\_564 104.07(9) ?  
M1b1 A1b O1b 1\_565 . 1\_466 141.57(10) ?  
M1b1 A1b O2b 1\_565 . 1\_466 177.39(11) ?  
M1b1 A1b O3b 1\_565 . 1\_466 137.70(9) ?  
M1b1 A1b O4a 1\_565 . 4\_564 130.10(11) ?  
M1b1 A1b O5a 1\_565 . 4\_564 59.37(7) ?  
M1b1 A1b O7a 1\_565 . 4\_564 92.01(10) ?  
M1b1 A1b O9b 1\_565 . 1\_565 15.74(7) ?  
M1b1 A1b O10a 1\_565 . . 93.50(11) ?  
M1b1 A1b O11a 1\_565 . . 134.21(11) ?  
M1b1 A1b O12b 1\_565 . 4\_555 55.11(9) ?  
M1b1 A1b O13b 1\_565 . 3\_764 77.12(8) ?  
M1b1 A1b O15b 1\_565 . 3\_764 58.36(10) ?  
M1b1 A1b M1a2 4\_555 . . 78.73(6) ?  
M1b1 A1b M1a2 4\_555 . 4\_564 122.86(7) ?  
M1b1 A1b M1b2 4\_555 . 1\_565 79.90(6) ?  
M1b1 A1b M1b2 4\_555 . 4\_555 0 ?  
M1b1 A1b M2a1 4\_555 . 4\_564 98.91(7) ?  
M1b1 A1b M2a2 4\_555 . 4\_564 98.91(7) ?  
M1b1 A1b M2a3 4\_555 . 4\_564 98.91(7) ?  
M1b1 A1b M2b1 4\_555 . 3\_764 122.99(7) ?  
M1b1 A1b M2b2 4\_555 . 3\_764 122.99(7) ?  
M1b1 A1b M2b3 4\_555 . 3\_764 122.99(7) ?  
M1b1 A1b M3a1 4\_555 . 2\_655 152.76(9) ?  
M1b1 A1b M3a2 4\_555 . 2\_655 152.76(9) ?  
M1b1 A1b P2a 4\_555 . 4\_564 151.88(9) ?  
M1b1 A1b P1a 4\_555 . 4\_564 48.70(5) ?  
M1b1 A1b P1b 4\_555 . 1\_466 117.34(8) ?  
M1b1 A1b A1a 4\_555 . . 0 ?  
M1b1 A1b A2b 4\_555 . 1\_465 108.73(6) ?  
M1b1 A1b A2b 4\_555 . 1\_565 45.87(4) ?  
M1b1 A1b X1 4\_555 . 4\_564 124.21(11) ?  
M1b1 A1b O1a 4\_555 . 4\_564 27.69(7) ?  
M1b1 A1b O1b 4\_555 . 1\_466 106.09(9) ?  
M1b1 A1b O2b 4\_555 . 1\_466 101.96(9) ?  
M1b1 A1b O3b 4\_555 . 1\_466 140.77(10) ?  
M1b1 A1b O4a 4\_555 . 4\_564 69.84(9) ?  
M1b1 A1b O5a 4\_555 . 4\_564 134.70(11) ?  
M1b1 A1b O7a 4\_555 . 4\_564 167.10(12) ?  
M1b1 A1b O9b 4\_555 . 1\_565 95.56(10) ?  
M1b1 A1b O10a 4\_555 . . 84.27(11) ?  
M1b1 A1b O11a 4\_555 . . 60.51(8) ?  
M1b1 A1b O12b 4\_555 . 4\_555 27.02(8) ?  
M1b1 A1b O13b 4\_555 . 3\_764 115.59(10) ?  
M1b1 A1b O15b 4\_555 . 3\_764 71.09(10) ?

M1a2 A1b M1a2 . . 4\_564 87.27(6) ?  
M1a2 A1b M1b2 . . 1\_565 122.96(8) ?  
M1a2 A1b M1b2 . . 4\_555 78.73(6) ?  
M1a2 A1b M2a1 . . 4\_564 89.08(7) ?  
M1a2 A1b M2a2 . . 4\_564 89.08(7) ?  
M1a2 A1b M2a3 . . 4\_564 89.08(7) ?  
M1a2 A1b M2b1 . . 3\_764 157.70(8) ?  
M1a2 A1b M2b2 . . 3\_764 157.70(8) ?  
M1a2 A1b M2b3 . . 3\_764 157.70(8) ?  
M1a2 A1b M3a1 . . 2\_655 101.07(7) ?  
M1a2 A1b M3a2 . . 2\_655 101.07(7) ?  
M1a2 A1b P2a . . 4\_564 117.78(8) ?  
M1a2 A1b P1a . . 4\_564 90.64(7) ?  
M1a2 A1b P1b . . 1\_466 52.06(5) ?  
M1a2 A1b A1a . . . 0 ?  
M1a2 A1b A2b . . 1\_465 48.09(4) ?  
M1a2 A1b A2b . . 1\_565 104.20(7) ?  
M1a2 A1b X1 . . 4\_564 106.93(11) ?  
M1a2 A1b O1a . . 4\_564 76.62(8) ?  
M1a2 A1b O1b . . 1\_466 30.74(7) ?  
M1a2 A1b O2b . . 1\_466 59.41(8) ?  
M1a2 A1b O3b . . 1\_466 70.70(8) ?  
M1a2 A1b O4a . . 4\_564 89.38(10) ?  
M1a2 A1b O5a . . 4\_564 106.08(10) ?  
M1a2 A1b O7a . . 4\_564 114.17(11) ?  
M1a2 A1b O9b . . 1\_565 128.63(12) ?  
M1a2 A1b O10a . . . 32.30(9) ?  
M1a2 A1b O11a . . . 32.82(7) ?  
M1a2 A1b O12b . . 4\_555 86.70(11) ?  
M1a2 A1b O13b . . 3\_764 158.38(11) ?  
M1a2 A1b O15b . . 3\_764 149.11(13) ?  
M1a2 A1b M1b2 4\_564 . 1\_565 62.42(4) ?  
M1a2 A1b M1b2 4\_564 . 4\_555 122.86(7) ?  
M1a2 A1b M2a1 4\_564 . 4\_564 136.29(8) ?  
M1a2 A1b M2a2 4\_564 . 4\_564 136.29(8) ?  
M1a2 A1b M2a3 4\_564 . 4\_564 136.29(8) ?  
M1a2 A1b M2b1 4\_564 . 3\_764 76.66(5) ?  
M1a2 A1b M2b2 4\_564 . 3\_764 76.66(5) ?  
M1a2 A1b M2b3 4\_564 . 3\_764 76.66(5) ?  
M1a2 A1b M3a1 4\_564 . 2\_655 84.14(6) ?  
M1a2 A1b M3a2 4\_564 . 2\_655 84.14(6) ?  
M1a2 A1b P2a 4\_564 . 4\_564 42.94(4) ?  
M1a2 A1b P1a 4\_564 . 4\_564 171.56(9) ?  
M1a2 A1b P1b 4\_564 . 1\_466 93.98(7) ?  
M1a2 A1b A1a 4\_564 . . 0 ?  
M1a2 A1b A2b 4\_564 . 1\_465 39.34(3) ?  
M1a2 A1b A2b 4\_564 . 1\_565 86.62(5) ?  
M1a2 A1b X1 4\_564 . 4\_564 112.90(10) ?  
M1a2 A1b O1a 4\_564 . 4\_564 148.37(11) ?  
M1a2 A1b O1b 4\_564 . 1\_466 84.12(8) ?  
M1a2 A1b O2b 4\_564 . 1\_466 117.49(9) ?  
M1a2 A1b O3b 4\_564 . 1\_466 80.29(8) ?  
M1a2 A1b O4a 4\_564 . 4\_564 165.75(12) ?  
M1a2 A1b O5a 4\_564 . 4\_564 20.91(7) ?

M1a2 A1b O7a 4\_564 . 4\_564 60.10(9) ?  
M1a2 A1b O9b 4\_564 . 1\_565 53.11(8) ?  
M1a2 A1b O10a 4\_564 . . 58.99(10) ?  
M1a2 A1b O11a 4\_564 . . 120.01(10) ?  
M1a2 A1b O12b 4\_564 . 4\_555 98.06(11) ?  
M1a2 A1b O13b 4\_564 . 3\_764 96.89(9) ?  
M1a2 A1b O15b 4\_564 . 3\_764 114.43(11) ?  
M1b2 A1b M1b2 1\_565 . 4\_555 79.90(6) ?  
M1b2 A1b M2a1 1\_565 . 4\_564 146.40(8) ?  
M1b2 A1b M2a2 1\_565 . 4\_564 146.40(8) ?  
M1b2 A1b M2a3 1\_565 . 4\_564 146.40(8) ?  
M1b2 A1b M2b1 1\_565 . 3\_764 62.61(4) ?  
M1b2 A1b M2b2 1\_565 . 3\_764 62.61(4) ?  
M1b2 A1b M2b3 1\_565 . 3\_764 62.61(4) ?  
M1b2 A1b M3a1 1\_565 . 2\_655 120.36(7) ?  
M1b2 A1b M3a2 1\_565 . 2\_655 120.36(7) ?  
M1b2 A1b P2a 1\_565 . 4\_564 72.01(6) ?  
M1b2 A1b P1a 1\_565 . 4\_564 112.42(7) ?  
M1b2 A1b P1b 1\_565 . 1\_466 156.36(8) ?  
M1b2 A1b A1a 1\_565 . . 0 ?  
M1b2 A1b A2b 1\_565 . 1\_465 92.00(5) ?  
M1b2 A1b A2b 1\_565 . 1\_565 34.20(3) ?  
M1b2 A1b X1 1\_565 . 4\_564 128.68(11) ?  
M1b2 A1b O1a 1\_565 . 4\_564 104.07(9) ?  
M1b2 A1b O1b 1\_565 . 1\_466 141.57(10) ?  
M1b2 A1b O2b 1\_565 . 1\_466 177.39(11) ?  
M1b2 A1b O3b 1\_565 . 1\_466 137.70(9) ?  
M1b2 A1b O4a 1\_565 . 4\_564 130.10(11) ?  
M1b2 A1b O5a 1\_565 . 4\_564 59.37(7) ?  
M1b2 A1b O7a 1\_565 . 4\_564 92.01(10) ?  
M1b2 A1b O9b 1\_565 . 1\_565 15.74(7) ?  
M1b2 A1b O10a 1\_565 . . 93.50(11) ?  
M1b2 A1b O11a 1\_565 . . 134.21(11) ?  
M1b2 A1b O12b 1\_565 . 4\_555 55.11(9) ?  
M1b2 A1b O13b 1\_565 . 3\_764 77.12(8) ?  
M1b2 A1b O15b 1\_565 . 3\_764 58.36(10) ?  
M1b2 A1b M2a1 4\_555 . 4\_564 98.91(7) ?  
M1b2 A1b M2a2 4\_555 . 4\_564 98.91(7) ?  
M1b2 A1b M2a3 4\_555 . 4\_564 98.91(7) ?  
M1b2 A1b M2b1 4\_555 . 3\_764 122.99(7) ?  
M1b2 A1b M2b2 4\_555 . 3\_764 122.99(7) ?  
M1b2 A1b M2b3 4\_555 . 3\_764 122.99(7) ?  
M1b2 A1b M3a1 4\_555 . 2\_655 152.76(9) ?  
M1b2 A1b M3a2 4\_555 . 2\_655 152.76(9) ?  
M1b2 A1b P2a 4\_555 . 4\_564 151.88(9) ?  
M1b2 A1b P1a 4\_555 . 4\_564 48.70(5) ?  
M1b2 A1b P1b 4\_555 . 1\_466 117.34(8) ?  
M1b2 A1b A1a 4\_555 . . 0 ?  
M1b2 A1b A2b 4\_555 . 1\_465 108.73(6) ?  
M1b2 A1b A2b 4\_555 . 1\_565 45.87(4) ?  
M1b2 A1b X1 4\_555 . 4\_564 124.21(11) ?  
M1b2 A1b O1a 4\_555 . 4\_564 27.69(7) ?  
M1b2 A1b O1b 4\_555 . 1\_466 106.09(9) ?  
M1b2 A1b O2b 4\_555 . 1\_466 101.96(9) ?

paulkerrite.cif

M1b2 A1b O3b 4\_555 . 1\_466 140.77(10) ?  
M1b2 A1b O4a 4\_555 . 4\_564 69.84(9) ?  
M1b2 A1b O5a 4\_555 . 4\_564 134.70(11) ?  
M1b2 A1b O7a 4\_555 . 4\_564 167.10(12) ?  
M1b2 A1b O9b 4\_555 . 1\_565 95.56(10) ?  
M1b2 A1b O10a 4\_555 . . 84.27(11) ?  
M1b2 A1b O11a 4\_555 . . 60.51(8) ?  
M1b2 A1b O12b 4\_555 . 4\_555 27.02(8) ?  
M1b2 A1b O13b 4\_555 . 3\_764 115.59(10) ?  
M1b2 A1b O15b 4\_555 . 3\_764 71.09(10) ?  
M2a1 A1b M2a2 4\_564 . 4\_564 0 ?  
M2a1 A1b M2a3 4\_564 . 4\_564 0 ?  
M2a1 A1b M2b1 4\_564 . 3\_764 91.96(7) ?  
M2a1 A1b M2b2 4\_564 . 3\_764 91.96(7) ?  
M2a1 A1b M2b3 4\_564 . 3\_764 91.96(7) ?  
M2a1 A1b M3a1 4\_564 . 2\_655 53.97(5) ?  
M2a1 A1b M3a2 4\_564 . 2\_655 53.97(5) ?  
M2a1 A1b P2a 4\_564 . 4\_564 103.69(8) ?  
M2a1 A1b P1a 4\_564 . 4\_564 51.77(5) ?  
M2a1 A1b P1b 4\_564 . 1\_466 51.64(5) ?  
M2a1 A1b A1a 4\_564 . . 0 ?  
M2a1 A1b A2b 4\_564 . 1\_465 119.46(7) ?  
M2a1 A1b A2b 4\_564 . 1\_565 136.18(7) ?  
M2a1 A1b X1 4\_564 . 4\_564 29.10(8) ?  
M2a1 A1b O1a 4\_564 . 4\_564 71.31(8) ?  
M2a1 A1b O1b 4\_564 . 1\_466 71.40(8) ?  
M2a1 A1b O2b 4\_564 . 1\_466 31.79(7) ?  
M2a1 A1b O3b 4\_564 . 1\_466 57.57(8) ?  
M2a1 A1b O4a 4\_564 . 4\_564 29.72(8) ?  
M2a1 A1b O5a 4\_564 . 4\_564 125.80(11) ?  
M2a1 A1b O7a 4\_564 . 4\_564 82.24(11) ?  
M2a1 A1b O9b 4\_564 . 1\_565 141.68(12) ?  
M2a1 A1b O10a 4\_564 . . 119.93(12) ?  
M2a1 A1b O11a 4\_564 . . 67.65(9) ?  
M2a1 A1b O12b 4\_564 . 4\_555 125.19(12) ?  
M2a1 A1b O13b 4\_564 . 3\_764 73.23(9) ?  
M2a1 A1b O15b 4\_564 . 3\_764 89.22(12) ?  
M2a2 A1b M2a3 4\_564 . 4\_564 0 ?  
M2a2 A1b M2b1 4\_564 . 3\_764 91.96(7) ?  
M2a2 A1b M2b2 4\_564 . 3\_764 91.96(7) ?  
M2a2 A1b M2b3 4\_564 . 3\_764 91.96(7) ?  
M2a2 A1b M3a1 4\_564 . 2\_655 53.97(5) ?  
M2a2 A1b M3a2 4\_564 . 2\_655 53.97(5) ?  
M2a2 A1b P2a 4\_564 . 4\_564 103.69(8) ?  
M2a2 A1b P1a 4\_564 . 4\_564 51.77(5) ?  
M2a2 A1b P1b 4\_564 . 1\_466 51.64(5) ?  
M2a2 A1b A1a 4\_564 . . 0 ?  
M2a2 A1b A2b 4\_564 . 1\_465 119.46(7) ?  
M2a2 A1b A2b 4\_564 . 1\_565 136.18(7) ?  
M2a2 A1b X1 4\_564 . 4\_564 29.10(8) ?  
M2a2 A1b O1a 4\_564 . 4\_564 71.31(8) ?  
M2a2 A1b O1b 4\_564 . 1\_466 71.40(8) ?  
M2a2 A1b O2b 4\_564 . 1\_466 31.79(7) ?  
M2a2 A1b O3b 4\_564 . 1\_466 57.57(8) ?

paulkerrite.cif

M2a2 A1b O4a 4\_564 . 4\_564 29.72(8) ?  
M2a2 A1b O5a 4\_564 . 4\_564 125.80(11) ?  
M2a2 A1b O7a 4\_564 . 4\_564 82.24(11) ?  
M2a2 A1b O9b 4\_564 . 1\_565 141.68(12) ?  
M2a2 A1b O10a 4\_564 . . 119.93(12) ?  
M2a2 A1b O11a 4\_564 . . 67.65(9) ?  
M2a2 A1b O12b 4\_564 . 4\_555 125.19(12) ?  
M2a2 A1b O13b 4\_564 . 3\_764 73.23(9) ?  
M2a2 A1b O15b 4\_564 . 3\_764 89.22(12) ?  
M2a3 A1b M2b1 4\_564 . 3\_764 91.96(7) ?  
M2a3 A1b M2b2 4\_564 . 3\_764 91.96(7) ?  
M2a3 A1b M2b3 4\_564 . 3\_764 91.96(7) ?  
M2a3 A1b M3a1 4\_564 . 2\_655 53.97(5) ?  
M2a3 A1b M3a2 4\_564 . 2\_655 53.97(5) ?  
M2a3 A1b P2a 4\_564 . 4\_564 103.69(8) ?  
M2a3 A1b P1a 4\_564 . 4\_564 51.77(5) ?  
M2a3 A1b P1b 4\_564 . 1\_466 51.64(5) ?  
M2a3 A1b A1a 4\_564 . . 0 ?  
M2a3 A1b A2b 4\_564 . 1\_465 119.46(7) ?  
M2a3 A1b A2b 4\_564 . 1\_565 136.18(7) ?  
M2a3 A1b X1 4\_564 . 4\_564 29.10(8) ?  
M2a3 A1b O1a 4\_564 . 4\_564 71.31(8) ?  
M2a3 A1b O1b 4\_564 . 1\_466 71.40(8) ?  
M2a3 A1b O2b 4\_564 . 1\_466 31.79(7) ?  
M2a3 A1b O3b 4\_564 . 1\_466 57.57(8) ?  
M2a3 A1b O4a 4\_564 . 4\_564 29.72(8) ?  
M2a3 A1b O5a 4\_564 . 4\_564 125.80(11) ?  
M2a3 A1b O7a 4\_564 . 4\_564 82.24(11) ?  
M2a3 A1b O9b 4\_564 . 1\_565 141.68(12) ?  
M2a3 A1b O10a 4\_564 . . 119.93(12) ?  
M2a3 A1b O11a 4\_564 . . 67.65(9) ?  
M2a3 A1b O12b 4\_564 . 4\_555 125.19(12) ?  
M2a3 A1b O13b 4\_564 . 3\_764 73.23(9) ?  
M2a3 A1b O15b 4\_564 . 3\_764 89.22(12) ?  
M2b1 A1b M2b2 3\_764 . 3\_764 0 ?  
M2b1 A1b M2b3 3\_764 . 3\_764 0 ?  
M2b1 A1b M3a1 3\_764 . 2\_655 62.42(5) ?  
M2b1 A1b M3a2 3\_764 . 2\_655 62.42(5) ?  
M2b1 A1b P2a 3\_764 . 4\_564 40.58(4) ?  
M2b1 A1b P1a 3\_764 . 4\_564 107.40(7) ?  
M2b1 A1b P1b 3\_764 . 1\_466 113.06(8) ?  
M2b1 A1b A1a 3\_764 . . 0 ?  
M2b1 A1b A2b 3\_764 . 1\_465 113.60(5) ?  
M2b1 A1b A2b 3\_764 . 1\_565 90.35(5) ?  
M2b1 A1b X1 3\_764 . 4\_564 66.68(9) ?  
M2b1 A1b O1a 3\_764 . 4\_564 124.67(10) ?  
M2b1 A1b O1b 3\_764 . 1\_466 130.22(10) ?  
M2b1 A1b O2b 3\_764 . 1\_466 114.78(10) ?  
M2b1 A1b O3b 3\_764 . 1\_466 91.17(9) ?  
M2b1 A1b O4a 3\_764 . 4\_564 102.40(11) ?  
M2b1 A1b O5a 3\_764 . 4\_564 56.11(7) ?  
M2b1 A1b O7a 3\_764 . 4\_564 44.15(8) ?  
M2b1 A1b O9b 3\_764 . 1\_565 50.90(8) ?  
M2b1 A1b O10a 3\_764 . . 135.63(12) ?



M2b1 A1b O11a 3\_764 . . 159.36(11) ?  
M2b1 A1b O12b 3\_764 . 4\_555 110.53(11) ?  
M2b1 A1b O13b 3\_764 . 3\_764 21.02(6) ?  
M2b1 A1b O15b 3\_764 . 3\_764 53.18(9) ?  
M2b2 A1b M2b3 3\_764 . 3\_764 0 ?  
M2b2 A1b M3a1 3\_764 . 2\_655 62.42(5) ?  
M2b2 A1b M3a2 3\_764 . 2\_655 62.42(5) ?  
M2b2 A1b P2a 3\_764 . 4\_564 40.58(4) ?  
M2b2 A1b P1a 3\_764 . 4\_564 107.40(7) ?  
M2b2 A1b P1b 3\_764 . 1\_466 113.06(8) ?  
M2b2 A1b A1a 3\_764 . . 0 ?  
M2b2 A1b A2b 3\_764 . 1\_465 113.60(5) ?  
M2b2 A1b A2b 3\_764 . 1\_565 90.35(5) ?  
M2b2 A1b X1 3\_764 . 4\_564 66.68(9) ?  
M2b2 A1b O1a 3\_764 . 4\_564 124.67(10) ?  
M2b2 A1b O1b 3\_764 . 1\_466 130.22(10) ?  
M2b2 A1b O2b 3\_764 . 1\_466 114.78(10) ?  
M2b2 A1b O3b 3\_764 . 1\_466 91.17(9) ?  
M2b2 A1b O4a 3\_764 . 4\_564 102.40(11) ?  
M2b2 A1b O5a 3\_764 . 4\_564 56.11(7) ?  
M2b2 A1b O7a 3\_764 . 4\_564 44.15(8) ?  
M2b2 A1b O9b 3\_764 . 1\_565 50.90(8) ?  
M2b2 A1b O10a 3\_764 . . 135.63(12) ?  
M2b2 A1b O11a 3\_764 . . 159.36(11) ?  
M2b2 A1b O12b 3\_764 . 4\_555 110.53(11) ?  
M2b2 A1b O13b 3\_764 . 3\_764 21.02(6) ?  
M2b2 A1b O15b 3\_764 . 3\_764 53.18(9) ?  
M2b3 A1b M3a1 3\_764 . 2\_655 62.42(5) ?  
M2b3 A1b M3a2 3\_764 . 2\_655 62.42(5) ?  
M2b3 A1b P2a 3\_764 . 4\_564 40.58(4) ?  
M2b3 A1b P1a 3\_764 . 4\_564 107.40(7) ?  
M2b3 A1b P1b 3\_764 . 1\_466 113.06(8) ?  
M2b3 A1b A1a 3\_764 . . 0 ?  
M2b3 A1b A2b 3\_764 . 1\_465 113.60(5) ?  
M2b3 A1b A2b 3\_764 . 1\_565 90.35(5) ?  
M2b3 A1b X1 3\_764 . 4\_564 66.68(9) ?  
M2b3 A1b O1a 3\_764 . 4\_564 124.67(10) ?  
M2b3 A1b O1b 3\_764 . 1\_466 130.22(10) ?  
M2b3 A1b O2b 3\_764 . 1\_466 114.78(10) ?  
M2b3 A1b O3b 3\_764 . 1\_466 91.17(9) ?  
M2b3 A1b O4a 3\_764 . 4\_564 102.40(11) ?  
M2b3 A1b O5a 3\_764 . 4\_564 56.11(7) ?  
M2b3 A1b O7a 3\_764 . 4\_564 44.15(8) ?  
M2b3 A1b O9b 3\_764 . 1\_565 50.90(8) ?  
M2b3 A1b O10a 3\_764 . . 135.63(12) ?  
M2b3 A1b O11a 3\_764 . . 159.36(11) ?  
M2b3 A1b O12b 3\_764 . 4\_555 110.53(11) ?  
M2b3 A1b O13b 3\_764 . 3\_764 21.02(6) ?  
M2b3 A1b O15b 3\_764 . 3\_764 53.18(9) ?  
M3a1 A1b M3a2 2\_655 . 2\_655 0 ?  
M3a1 A1b P2a 2\_655 . 4\_564 51.45(5) ?  
M3a1 A1b P1a 2\_655 . 4\_564 104.29(8) ?  
M3a1 A1b P1b 2\_655 . 1\_466 50.67(5) ?  
M3a1 A1b A1a 2\_655 . . 0 ?

M3a1 A1b A2b 2\_655 . 1\_465 89.76(5) ?  
M3a1 A1b A2b 2\_655 . 1\_565 152.59(7) ?  
M3a1 A1b X1 2\_655 . 4\_564 29.31(8) ?  
M3a1 A1b O1a 2\_655 . 4\_564 125.28(10) ?  
M3a1 A1b O1b 2\_655 . 1\_466 70.33(8) ?  
M3a1 A1b O2b 2\_655 . 1\_466 57.27(7) ?  
M3a1 A1b O3b 2\_655 . 1\_466 30.49(6) ?  
M3a1 A1b O4a 2\_655 . 4\_564 82.93(10) ?  
M3a1 A1b O5a 2\_655 . 4\_564 71.97(8) ?  
M3a1 A1b O7a 2\_655 . 4\_564 29.74(8) ?  
M3a1 A1b O9b 2\_655 . 1\_565 105.03(10) ?  
M3a1 A1b O10a 2\_655 . . 110.30(12) ?  
M3a1 A1b O11a 2\_655 . . 104.88(10) ?  
M3a1 A1b O12b 2\_655 . 4\_555 172.04(13) ?  
M3a1 A1b O13b 2\_655 . 3\_764 58.55(8) ?  
M3a1 A1b O15b 2\_655 . 3\_764 102.74(13) ?  
M3a2 A1b P2a 2\_655 . 4\_564 51.45(5) ?  
M3a2 A1b P1a 2\_655 . 4\_564 104.29(8) ?  
M3a2 A1b P1b 2\_655 . 1\_466 50.67(5) ?  
M3a2 A1b A1a 2\_655 . . 0 ?  
M3a2 A1b A2b 2\_655 . 1\_465 89.76(5) ?  
M3a2 A1b A2b 2\_655 . 1\_565 152.59(7) ?  
M3a2 A1b X1 2\_655 . 4\_564 29.31(8) ?  
M3a2 A1b O1a 2\_655 . 4\_564 125.28(10) ?  
M3a2 A1b O1b 2\_655 . 1\_466 70.33(8) ?  
M3a2 A1b O2b 2\_655 . 1\_466 57.27(7) ?  
M3a2 A1b O3b 2\_655 . 1\_466 30.49(6) ?  
M3a2 A1b O4a 2\_655 . 4\_564 82.93(10) ?  
M3a2 A1b O5a 2\_655 . 4\_564 71.97(8) ?  
M3a2 A1b O7a 2\_655 . 4\_564 29.74(8) ?  
M3a2 A1b O9b 2\_655 . 1\_565 105.03(10) ?  
M3a2 A1b O10a 2\_655 . . 110.30(12) ?  
M3a2 A1b O11a 2\_655 . . 104.88(10) ?  
M3a2 A1b O12b 2\_655 . 4\_555 172.04(13) ?  
M3a2 A1b O13b 2\_655 . 3\_764 58.55(8) ?  
M3a2 A1b O15b 2\_655 . 3\_764 102.74(13) ?  
P2a A1b P1a 4\_564 . 4\_564 143.87(10) ?  
P2a A1b P1b 4\_564 . 1\_466 90.02(8) ?  
P2a A1b A1a 4\_564 . . 0 ?  
P2a A1b A2b 4\_564 . 1\_465 74.17(6) ?  
P2a A1b A2b 4\_564 . 1\_565 106.14(7) ?  
P2a A1b X1 4\_564 . 4\_564 75.06(10) ?  
P2a A1b O1a 4\_564 . 4\_564 165.13(12) ?  
P2a A1b O1b 4\_564 . 1\_466 96.90(9) ?  
P2a A1b O2b 4\_564 . 1\_466 106.07(10) ?  
P2a A1b O3b 4\_564 . 1\_466 66.98(8) ?  
P2a A1b O4a 4\_564 . 4\_564 128.89(13) ?  
P2a A1b O5a 4\_564 . 4\_564 23.59(7) ?  
P2a A1b O7a 4\_564 . 4\_564 21.79(8) ?  
P2a A1b O9b 4\_564 . 1\_565 56.32(8) ?  
P2a A1b O10a 4\_564 . . 98.47(12) ?  
P2a A1b O11a 4\_564 . . 144.75(11) ?  
P2a A1b O12b 4\_564 . 4\_555 126.19(12) ?  
P2a A1b O13b 4\_564 . 3\_764 57.16(8) ?

P2a A1b O15b 4\_564 . 3\_764 92.54(11) ?  
 P1a A1b P1b 4\_564 . 1\_466 91.17(7) ?  
 P1a A1b A1a 4\_564 . . 0 ?  
 P1a A1b A2b 4\_564 . 1\_465 138.55(7) ?  
 P1a A1b A2b 4\_564 . 1\_565 85.97(6) ?  
 P1a A1b X1 4\_564 . 4\_564 75.53(10) ?  
 P1a A1b O1a 4\_564 . 4\_564 23.68(7) ?  
 P1a A1b O1b 4\_564 . 1\_466 98.20(9) ?  
 P1a A1b O2b 4\_564 . 1\_466 68.00(8) ?  
 P1a A1b O3b 4\_564 . 1\_466 106.72(10) ?  
 P1a A1b O4a 4\_564 . 4\_564 22.06(8) ?  
 P1a A1b O5a 4\_564 . 4\_564 163.24(12) ?  
 P1a A1b O7a 4\_564 . 4\_564 127.99(13) ?  
 P1a A1b O9b 4\_564 . 1\_565 123.48(11) ?  
 P1a A1b O10a 4\_564 . . 116.45(12) ?  
 P1a A1b O11a 4\_564 . . 57.93(8) ?  
 P1a A1b O12b 4\_564 . 4\_555 73.64(10) ?  
 P1a A1b O13b 4\_564 . 3\_764 88.04(9) ?  
 P1a A1b O15b 4\_564 . 3\_764 64.59(10) ?  
 P1b A1b A1a 1\_466 . . 0 ?  
 P1b A1b A2b 1\_466 . 1\_465 67.83(5) ?  
 P1b A1b A2b 1\_466 . 1\_565 156.11(8) ?  
 P1b A1b X1 1\_466 . 4\_564 56.88(9) ?  
 P1b A1b O1a 1\_466 . 4\_564 97.07(9) ?  
 P1b A1b O1b 1\_466 . 1\_466 23.16(7) ?  
 P1b A1b O2b 1\_466 . 1\_466 23.56(6) ?  
 P1b A1b O3b 1\_466 . 1\_466 23.54(6) ?  
 P1b A1b O4a 1\_466 . 4\_564 73.15(10) ?  
 P1b A1b O5a 1\_466 . 4\_564 98.23(9) ?  
 P1b A1b O7a 1\_466 . 4\_564 73.48(10) ?  
 P1b A1b O9b 1\_466 . 1\_565 143.79(11) ?  
 P1b A1b O10a 1\_466 . . 73.62(11) ?  
 P1b A1b O11a 1\_466 . . 57.19(8) ?  
 P1b A1b O12b 1\_466 . 4\_555 136.35(13) ?  
 P1b A1b O13b 1\_466 . 3\_764 106.38(10) ?  
 P1b A1b O15b 1\_466 . 3\_764 140.05(14) ?  
 A1a A1b A2b . . 1\_465 0 ?  
 A1a A1b A2b . . 1\_565 0 ?  
 A1a A1b X1 . . 4\_564 0 ?  
 A1a A1b O1a . . 4\_564 0 ?  
 A1a A1b O1b . . 1\_466 0 ?  
 A1a A1b O2b . . 1\_466 0 ?  
 A1a A1b O3b . . 1\_466 0 ?  
 A1a A1b O4a . . 4\_564 0 ?  
 A1a A1b O5a . . 4\_564 0 ?  
 A1a A1b O7a . . 4\_564 0 ?  
 A1a A1b O9b . . 1\_565 0 ?  
 A1a A1b O10a . . . 0 ?  
 A1a A1b O11a . . . 0 ?  
 A1a A1b O12b . . 4\_555 0 ?  
 A1a A1b O13b . . 3\_764 0 ?  
 A1a A1b O15b . . 3\_764 0 ?  
 A2b A1b A2b 1\_465 . 1\_565 99.25(5) ?  
 A2b A1b X1 1\_465 . 4\_564 115.37(10) ?

A2b A1b 01a 1\_465 . 4\_564 120.62(9) ?  
 A2b A1b 01b 1\_465 . 1\_466 49.78(7) ?  
 A2b A1b 02b 1\_465 . 1\_466 89.13(8) ?  
 A2b A1b 03b 1\_465 . 1\_466 67.54(8) ?  
 A2b A1b 04a 1\_465 . 4\_564 134.53(11) ?  
 A2b A1b 05a 1\_465 . 4\_564 58.20(8) ?  
 A2b A1b 07a 1\_465 . 4\_564 81.38(10) ?  
 A2b A1b 09b 1\_465 . 1\_565 88.42(9) ?  
 A2b A1b 010a 1\_465 . . 25.15(9) ?  
 A2b A1b 011a 1\_465 . . 80.90(9) ?  
 A2b A1b 012b 1\_465 . 4\_555 96.80(11) ?  
 A2b A1b 013b 1\_465 . 3\_764 131.21(9) ?  
 A2b A1b 015b 1\_465 . 3\_764 150.27(12) ?  
 A2b A1b X1 1\_565 . 4\_564 143.69(10) ?  
 A2b A1b 01a 1\_565 . 4\_564 71.62(8) ?  
 A2b A1b 01b 1\_565 . 1\_466 134.20(10) ?  
 A2b A1b 02b 1\_565 . 1\_466 147.78(9) ?  
 A2b A1b 03b 1\_565 . 1\_466 166.09(10) ?  
 A2b A1b 04a 1\_565 . 4\_564 107.63(10) ?  
 A2b A1b 05a 1\_565 . 4\_564 90.82(8) ?  
 A2b A1b 07a 1\_565 . 4\_564 126.06(10) ?  
 A2b A1b 09b 1\_565 . 1\_565 49.95(8) ?  
 A2b A1b 010a 1\_565 . . 86.44(11) ?  
 A2b A1b 011a 1\_565 . . 102.10(9) ?  
 A2b A1b 012b 1\_565 . 4\_555 21.40(9) ?  
 A2b A1b 013b 1\_565 . 3\_764 97.24(8) ?  
 A2b A1b 015b 1\_565 . 3\_764 58.34(11) ?  
 X1 A1b 01a 4\_564 . 4\_564 97.89(12) ?  
 X1 A1b 01b 4\_564 . 1\_466 80.03(12) ?  
 X1 A1b 02b 4\_564 . 1\_466 48.75(10) ?  
 X1 A1b 03b 4\_564 . 1\_466 48.27(10) ?  
 X1 A1b 04a 4\_564 . 4\_564 55.10(12) ?  
 X1 A1b 05a 4\_564 . 4\_564 98.03(12) ?  
 X1 A1b 07a 4\_564 . 4\_564 54.21(12) ?  
 X1 A1b 09b 4\_564 . 1\_565 117.43(14) ?  
 X1 A1b 010a 4\_564 . . 129.73(15) ?  
 X1 A1b 011a 4\_564 . . 94.21(13) ?  
 X1 A1b 012b 4\_564 . 4\_555 146.33(15) ?  
 X1 A1b 013b 4\_564 . 3\_764 51.94(10) ?  
 X1 A1b 015b 4\_564 . 3\_764 85.41(14) ?  
 01a A1b 01b 4\_564 . 1\_466 94.68(11) ?  
 01a A1b 02b 4\_564 . 1\_466 77.32(10) ?  
 01a A1b 03b 4\_564 . 1\_466 118.23(11) ?  
 01a A1b 04a 4\_564 . 4\_564 42.81(10) ?  
 01a A1b 05a 4\_564 . 4\_564 162.22(13) ?  
 01a A1b 07a 4\_564 . 4\_564 151.51(15) ?  
 01a A1b 09b 4\_564 . 1\_565 118.85(12) ?  
 01a A1b 010a 4\_564 . . 96.07(13) ?  
 01a A1b 011a 4\_564 . . 47.34(9) ?  
 01a A1b 012b 4\_564 . 4\_555 54.57(11) ?  
 01a A1b 013b 4\_564 . 3\_764 108.14(12) ?  
 01a A1b 015b 4\_564 . 3\_764 73.65(11) ?  
 01b A1b 02b 1\_466 . 1\_466 39.83(9) ?  
 01b A1b 03b 1\_466 . 1\_466 40.00(9) ?

## paulkerrite.cif

01b A1b 04a 1\_466 . 4\_564 85.92(12) ?  
01b A1b 05a 1\_466 . 4\_564 95.82(11) ?  
01b A1b 07a 1\_466 . 4\_564 86.50(12) ?  
01b A1b 09b 1\_466 . 1\_565 137.03(13) ?  
01b A1b 010a 1\_466 . . 50.80(11) ?  
01b A1b 011a 1\_466 . . 47.87(10) ?  
01b A1b 012b 1\_466 . 4\_555 117.44(14) ?  
01b A1b 013b 1\_466 . 3\_764 128.36(12) ?  
01b A1b 015b 1\_466 . 3\_764 159.95(15) ?  
02b A1b 03b 1\_466 . 1\_466 40.95(9) ?  
02b A1b 04a 1\_466 . 4\_564 49.63(10) ?  
02b A1b 05a 1\_466 . 4\_564 119.50(12) ?  
02b A1b 07a 1\_466 . 4\_564 85.84(12) ?  
02b A1b 09b 1\_466 . 1\_565 162.15(13) ?  
02b A1b 010a 1\_466 . . 88.52(13) ?  
02b A1b 011a 1\_466 . . 48.31(10) ?  
02b A1b 012b 1\_466 . 4\_555 127.08(13) ?  
02b A1b 013b 1\_466 . 3\_764 100.38(12) ?  
02b A1b 015b 1\_466 . 3\_764 120.37(14) ?  
03b A1b 04a 1\_466 . 4\_564 85.53(12) ?  
03b A1b 05a 1\_466 . 4\_564 78.61(10) ?  
03b A1b 07a 1\_466 . 4\_564 49.97(10) ?  
03b A1b 09b 1\_466 . 1\_565 122.62(12) ?  
03b A1b 010a 1\_466 . . 82.81(12) ?  
03b A1b 011a 1\_466 . . 80.72(11) ?  
03b A1b 012b 1\_466 . 4\_555 157.38(15) ?  
03b A1b 013b 1\_466 . 3\_764 89.02(11) ?  
03b A1b 015b 1\_466 . 3\_764 131.99(15) ?  
04a A1b 05a 4\_564 . 4\_564 152.47(15) ?  
04a A1b 07a 4\_564 . 4\_564 109.16(15) ?  
04a A1b 09b 4\_564 . 1\_565 136.84(14) ?  
04a A1b 010a 4\_564 . . 120.72(15) ?  
04a A1b 011a 4\_564 . . 58.30(11) ?  
04a A1b 012b 4\_564 . 4\_555 95.56(14) ?  
04a A1b 013b 4\_564 . 3\_764 81.39(12) ?  
04a A1b 015b 4\_564 . 3\_764 74.42(13) ?  
05a A1b 07a 4\_564 . 4\_564 43.85(10) ?  
05a A1b 09b 4\_564 . 1\_565 45.59(9) ?  
05a A1b 010a 4\_564 . . 79.68(12) ?  
05a A1b 011a 4\_564 . . 138.69(13) ?  
05a A1b 012b 4\_564 . 4\_555 107.72(13) ?  
05a A1b 013b 4\_564 . 3\_764 76.03(11) ?  
05a A1b 015b 4\_564 . 3\_764 99.83(12) ?  
07a A1b 09b 4\_564 . 1\_565 76.32(12) ?  
07a A1b 010a 4\_564 . . 106.40(15) ?  
07a A1b 011a 4\_564 . . 130.66(14) ?  
07a A1b 012b 4\_564 . 4\_555 147.08(15) ?  
07a A1b 013b 4\_564 . 3\_764 52.27(11) ?  
07a A1b 015b 4\_564 . 3\_764 96.13(14) ?  
09b A1b 010a 1\_565 . . 96.63(14) ?  
09b A1b 011a 1\_565 . . 148.11(14) ?  
09b A1b 012b 1\_565 . 4\_555 70.77(12) ?  
09b A1b 013b 1\_565 . 3\_764 68.51(11) ?  
09b A1b 015b 1\_565 . 3\_764 62.43(12) ?

O10a A1b O11a . . . 62.48(12) ?  
 O10a A1b O12b . . 4\_555 77.21(14) ?  
 O10a A1b O13b . . 3\_764 155.46(14) ?  
 O10a A1b O15b . . 3\_764 144.78(17) ?  
 O11a A1b O12b . . 4\_555 80.71(12) ?  
 O11a A1b O13b . . 3\_764 138.88(13) ?  
 O11a A1b O15b . . 3\_764 120.45(14) ?  
 O12b A1b O13b 4\_555 . 3\_764 113.51(13) ?  
 O12b A1b O15b 4\_555 . 3\_764 69.37(14) ?  
 O13b A1b O15b 3\_764 . 3\_764 45.66(12) ?  
 M1a1 A2b M1a1 1\_645 . 4\_654 80.68(4) ?  
 M1a1 A2b M1b1 1\_645 . . 122.21(4) ?  
 M1a1 A2b M1b1 1\_645 . 4\_545 62.26(3) ?  
 M1a1 A2b M1a2 1\_645 . 1\_645 0 ?  
 M1a1 A2b M1a2 1\_645 . 4\_654 80.68(4) ?  
 M1a1 A2b M1b2 1\_645 . . 122.21(4) ?  
 M1a1 A2b M1b2 1\_645 . 4\_545 62.26(3) ?  
 M1a1 A2b M2a1 1\_645 . 3\_756 63.55(3) ?  
 M1a1 A2b M2a2 1\_645 . 3\_756 63.55(3) ?  
 M1a1 A2b M2a3 1\_645 . 3\_756 63.55(3) ?  
 M1a1 A2b M2b1 1\_645 . 4\_545 147.82(4) ?  
 M1a1 A2b M2b2 1\_645 . 4\_545 147.82(4) ?  
 M1a1 A2b M2b3 1\_645 . 4\_545 147.82(4) ?  
 M1a1 A2b M3b1 1\_645 . 2\_744 120.77(4) ?  
 M1a1 A2b M3b2 1\_645 . 2\_744 120.77(4) ?  
 M1a1 A2b P2b 1\_645 . 4\_545 72.51(4) ?  
 M1a1 A2b P1a 1\_645 . 1\_544 155.28(5) ?  
 M1a1 A2b P1b 1\_645 . 4\_545 113.74(5) ?  
 M1a1 A2b A2a 1\_645 . . 0 ?  
 M1a1 A2b A1b 1\_645 . 1\_545 91.55(4) ?  
 M1a1 A2b A1b 1\_645 . 1\_645 34.59(3) ?  
 M1a1 A2b X2 1\_645 . 4\_545 130.42(8) ?  
 M1a1 A2b O1a 1\_645 . 1\_544 140.15(7) ?  
 M1a1 A2b O1b 1\_645 . 4\_545 104.91(7) ?  
 M1a1 A2b O2a 1\_645 . 1\_544 177.77(7) ?  
 M1a1 A2b O3a 1\_645 . 1\_544 137.49(7) ?  
 M1a1 A2b O4b 1\_645 . 4\_545 131.89(8) ?  
 M1a1 A2b O5b 1\_645 . 4\_545 59.67(6) ?  
 M1a1 A2b O7b 1\_645 . 4\_545 92.90(8) ?  
 M1a1 A2b O9a 1\_645 . 1\_645 15.88(7) ?  
 M1a1 A2b O10b 1\_645 . . 91.87(9) ?  
 M1a1 A2b O11b 1\_645 . . 133.88(9) ?  
 M1a1 A2b O12a 1\_645 . 4\_654 57.74(8) ?  
 M1a1 A2b O13a 1\_645 . 3\_756 79.21(7) ?  
 M1a1 A2b O15a 1\_645 . 3\_756 62.05(9) ?  
 M1a1 A2b M1b1 4\_654 . . 78.27(4) ?  
 M1a1 A2b M1b1 4\_654 . 4\_545 122.85(4) ?  
 M1a1 A2b M1a2 4\_654 . 1\_645 80.68(4) ?  
 M1a1 A2b M1a2 4\_654 . 4\_654 0 ?  
 M1a1 A2b M1b2 4\_654 . . 78.27(4) ?  
 M1a1 A2b M1b2 4\_654 . 4\_545 122.85(4) ?  
 M1a1 A2b M2a1 4\_654 . 3\_756 124.57(4) ?  
 M1a1 A2b M2a2 4\_654 . 3\_756 124.57(4) ?  
 M1a1 A2b M2a3 4\_654 . 3\_756 124.57(4) ?

M1a1 A2b M2b1 4\_654 . 4\_545 99.35(4) ?  
M1a1 A2b M2b2 4\_654 . 4\_545 99.35(4) ?  
M1a1 A2b M2b3 4\_654 . 4\_545 99.35(4) ?  
M1a1 A2b M3b1 4\_654 . 2\_744 153.03(4) ?  
M1a1 A2b M3b2 4\_654 . 2\_744 153.03(4) ?  
M1a1 A2b P2b 4\_654 . 4\_545 153.19(5) ?  
M1a1 A2b P1a 4\_654 . 1\_544 116.47(5) ?  
M1a1 A2b P1b 4\_654 . 4\_545 48.75(3) ?  
M1a1 A2b A2a 4\_654 . . 0 ?  
M1a1 A2b A1b 4\_654 . 1\_545 108.66(4) ?  
M1a1 A2b A1b 4\_654 . 1\_645 46.24(4) ?  
M1a1 A2b X2 4\_654 . 4\_545 124.59(8) ?  
M1a1 A2b O1a 4\_654 . 1\_544 105.68(7) ?  
M1a1 A2b O1b 4\_654 . 4\_545 27.65(7) ?  
M1a1 A2b O2a 4\_654 . 1\_544 101.51(7) ?  
M1a1 A2b O3a 4\_654 . 1\_544 139.56(7) ?  
M1a1 A2b O4b 4\_654 . 4\_545 69.78(8) ?  
M1a1 A2b O5b 4\_654 . 4\_545 135.03(8) ?  
M1a1 A2b O7b 4\_654 . 4\_545 169.90(9) ?  
M1a1 A2b O9a 4\_654 . 1\_645 96.50(8) ?  
M1a1 A2b O10b 4\_654 . . 83.37(9) ?  
M1a1 A2b O11b 4\_654 . . 59.91(8) ?  
M1a1 A2b O12a 4\_654 . 4\_654 25.99(8) ?  
M1a1 A2b O13a 4\_654 . 3\_756 117.58(8) ?  
M1a1 A2b O15a 4\_654 . 3\_756 72.68(10) ?  
M1b1 A2b M1b1 . . 4\_545 86.29(4) ?  
M1b1 A2b M1a2 . . 1\_645 122.21(4) ?  
M1b1 A2b M1a2 . . 4\_654 78.27(4) ?  
M1b1 A2b M1b2 . . . 0 ?  
M1b1 A2b M1b2 . . 4\_545 86.29(4) ?  
M1b1 A2b M2a1 . . 3\_756 156.61(5) ?  
M1b1 A2b M2a2 . . 3\_756 156.61(5) ?  
M1b1 A2b M2a3 . . 3\_756 156.61(5) ?  
M1b1 A2b M2b1 . . 4\_545 88.77(4) ?  
M1b1 A2b M2b2 . . 4\_545 88.77(4) ?  
M1b1 A2b M2b3 . . 4\_545 88.77(4) ?  
M1b1 A2b M3b1 . . 2\_744 99.98(4) ?  
M1b1 A2b M3b2 . . 2\_744 99.98(4) ?  
M1b1 A2b P2b . . 4\_545 116.09(5) ?  
M1b1 A2b P1a . . 1\_544 51.37(3) ?  
M1b1 A2b P1b . . 4\_545 90.21(4) ?  
M1b1 A2b A2a . . . 0 ?  
M1b1 A2b A1b . . 1\_545 47.76(4) ?  
M1b1 A2b A1b . . 1\_645 103.71(5) ?  
M1b1 A2b X2 . . 4\_545 105.54(8) ?  
M1b1 A2b O1a . . 1\_544 30.63(6) ?  
M1b1 A2b O1b . . 4\_545 76.43(7) ?  
M1b1 A2b O2a . . 1\_544 58.96(6) ?  
M1b1 A2b O3a . . 1\_544 69.66(6) ?  
M1b1 A2b O4b . . 4\_545 88.50(8) ?  
M1b1 A2b O5b . . 4\_545 104.26(7) ?  
M1b1 A2b O7b . . 4\_545 111.81(8) ?  
M1b1 A2b O9a . . 1\_645 127.84(8) ?  
M1b1 A2b O10b . . . 32.80(8) ?

M1b1 A2b O11b . . . 32.72(7) ?  
M1b1 A2b O12a . . 4\_654 83.67(9) ?  
M1b1 A2b O13a . . 3\_756 156.57(8) ?  
M1b1 A2b O15a . . 3\_756 149.52(10) ?  
M1b1 A2b M1a2 4\_545 . 1\_645 62.26(3) ?  
M1b1 A2b M1a2 4\_545 . 4\_654 122.85(4) ?  
M1b1 A2b M1b2 4\_545 . . 86.29(4) ?  
M1b1 A2b M1b2 4\_545 . 4\_545 0 ?  
M1b1 A2b M2a1 4\_545 . 3\_756 76.90(3) ?  
M1b1 A2b M2a2 4\_545 . 3\_756 76.90(3) ?  
M1b1 A2b M2a3 4\_545 . 3\_756 76.90(3) ?  
M1b1 A2b M2b1 4\_545 . 4\_545 135.28(4) ?  
M1b1 A2b M2b2 4\_545 . 4\_545 135.28(4) ?  
M1b1 A2b M2b3 4\_545 . 4\_545 135.28(4) ?  
M1b1 A2b M3b1 4\_545 . 2\_744 83.52(3) ?  
M1b1 A2b M3b2 4\_545 . 2\_744 83.52(3) ?  
M1b1 A2b P2b 4\_545 . 4\_545 42.49(3) ?  
M1b1 A2b P1a 4\_545 . 1\_544 93.02(4) ?  
M1b1 A2b P1b 4\_545 . 4\_545 171.52(5) ?  
M1b1 A2b A2a 4\_545 . . 0 ?  
M1b1 A2b A1b 4\_545 . 1\_545 38.73(4) ?  
M1b1 A2b A1b 4\_545 . 1\_645 86.73(4) ?  
M1b1 A2b X2 4\_545 . 4\_545 112.54(8) ?  
M1b1 A2b O1a 4\_545 . 1\_544 82.80(7) ?  
M1b1 A2b O1b 4\_545 . 4\_545 148.08(8) ?  
M1b1 A2b O2a 4\_545 . 1\_544 116.46(7) ?  
M1b1 A2b O3a 4\_545 . 1\_544 79.70(6) ?  
M1b1 A2b O4b 4\_545 . 4\_545 164.78(8) ?  
M1b1 A2b O5b 4\_545 . 4\_545 20.14(6) ?  
M1b1 A2b O7b 4\_545 . 4\_545 59.29(8) ?  
M1b1 A2b O9a 4\_545 . 1\_645 53.00(7) ?  
M1b1 A2b O10b 4\_545 . . 58.08(8) ?  
M1b1 A2b O11b 4\_545 . . 118.93(8) ?  
M1b1 A2b O12a 4\_545 . 4\_654 98.42(9) ?  
M1b1 A2b O13a 4\_545 . 3\_756 97.41(7) ?  
M1b1 A2b O15a 4\_545 . 3\_756 117.20(10) ?  
M1a2 A2b M1a2 1\_645 . 4\_654 80.68(4) ?  
M1a2 A2b M1b2 1\_645 . . 122.21(4) ?  
M1a2 A2b M1b2 1\_645 . 4\_545 62.26(3) ?  
M1a2 A2b M2a1 1\_645 . 3\_756 63.55(3) ?  
M1a2 A2b M2a2 1\_645 . 3\_756 63.55(3) ?  
M1a2 A2b M2a3 1\_645 . 3\_756 63.55(3) ?  
M1a2 A2b M2b1 1\_645 . 4\_545 147.82(4) ?  
M1a2 A2b M2b2 1\_645 . 4\_545 147.82(4) ?  
M1a2 A2b M2b3 1\_645 . 4\_545 147.82(4) ?  
M1a2 A2b M3b1 1\_645 . 2\_744 120.77(4) ?  
M1a2 A2b M3b2 1\_645 . 2\_744 120.77(4) ?  
M1a2 A2b P2b 1\_645 . 4\_545 72.51(4) ?  
M1a2 A2b P1a 1\_645 . 1\_544 155.28(5) ?  
M1a2 A2b P1b 1\_645 . 4\_545 113.74(5) ?  
M1a2 A2b A2a 1\_645 . . 0 ?  
M1a2 A2b A1b 1\_645 . 1\_545 91.55(4) ?  
M1a2 A2b A1b 1\_645 . 1\_645 34.59(3) ?  
M1a2 A2b X2 1\_645 . 4\_545 130.42(8) ?



M1a2 A2b O1a 1\_645 . 1\_544 140.15(7) ?  
M1a2 A2b O1b 1\_645 . 4\_545 104.91(7) ?  
M1a2 A2b O2a 1\_645 . 1\_544 177.77(7) ?  
M1a2 A2b O3a 1\_645 . 1\_544 137.49(7) ?  
M1a2 A2b O4b 1\_645 . 4\_545 131.89(8) ?  
M1a2 A2b O5b 1\_645 . 4\_545 59.67(6) ?  
M1a2 A2b O7b 1\_645 . 4\_545 92.90(8) ?  
M1a2 A2b O9a 1\_645 . 1\_645 15.88(7) ?  
M1a2 A2b O10b 1\_645 . . 91.87(9) ?  
M1a2 A2b O11b 1\_645 . . 133.88(9) ?  
M1a2 A2b O12a 1\_645 . 4\_654 57.74(8) ?  
M1a2 A2b O13a 1\_645 . 3\_756 79.21(7) ?  
M1a2 A2b O15a 1\_645 . 3\_756 62.05(9) ?  
M1a2 A2b M1b2 4\_654 . . 78.27(4) ?  
M1a2 A2b M1b2 4\_654 . 4\_545 122.85(4) ?  
M1a2 A2b M2a1 4\_654 . 3\_756 124.57(4) ?  
M1a2 A2b M2a2 4\_654 . 3\_756 124.57(4) ?  
M1a2 A2b M2a3 4\_654 . 3\_756 124.57(4) ?  
M1a2 A2b M2b1 4\_654 . 4\_545 99.35(4) ?  
M1a2 A2b M2b2 4\_654 . 4\_545 99.35(4) ?  
M1a2 A2b M2b3 4\_654 . 4\_545 99.35(4) ?  
M1a2 A2b M3b1 4\_654 . 2\_744 153.03(4) ?  
M1a2 A2b M3b2 4\_654 . 2\_744 153.03(4) ?  
M1a2 A2b P2b 4\_654 . 4\_545 153.19(5) ?  
M1a2 A2b P1a 4\_654 . 1\_544 116.47(5) ?  
M1a2 A2b P1b 4\_654 . 4\_545 48.75(3) ?  
M1a2 A2b A2a 4\_654 . . 0 ?  
M1a2 A2b A1b 4\_654 . 1\_545 108.66(4) ?  
M1a2 A2b A1b 4\_654 . 1\_645 46.24(4) ?  
M1a2 A2b X2 4\_654 . 4\_545 124.59(8) ?  
M1a2 A2b O1a 4\_654 . 1\_544 105.68(7) ?  
M1a2 A2b O1b 4\_654 . 4\_545 27.65(7) ?  
M1a2 A2b O2a 4\_654 . 1\_544 101.51(7) ?  
M1a2 A2b O3a 4\_654 . 1\_544 139.56(7) ?  
M1a2 A2b O4b 4\_654 . 4\_545 69.78(8) ?  
M1a2 A2b O5b 4\_654 . 4\_545 135.03(8) ?  
M1a2 A2b O7b 4\_654 . 4\_545 169.90(9) ?  
M1a2 A2b O9a 4\_654 . 1\_645 96.50(8) ?  
M1a2 A2b O10b 4\_654 . . 83.37(9) ?  
M1a2 A2b O11b 4\_654 . . 59.91(8) ?  
M1a2 A2b O12a 4\_654 . 4\_654 25.99(8) ?  
M1a2 A2b O13a 4\_654 . 3\_756 117.58(8) ?  
M1a2 A2b O15a 4\_654 . 3\_756 72.68(10) ?  
M1b2 A2b M1b2 . . 4\_545 86.29(4) ?  
M1b2 A2b M2a1 . . 3\_756 156.61(5) ?  
M1b2 A2b M2a2 . . 3\_756 156.61(5) ?  
M1b2 A2b M2a3 . . 3\_756 156.61(5) ?  
M1b2 A2b M2b1 . . 4\_545 88.77(4) ?  
M1b2 A2b M2b2 . . 4\_545 88.77(4) ?  
M1b2 A2b M2b3 . . 4\_545 88.77(4) ?  
M1b2 A2b M3b1 . . 2\_744 99.98(4) ?  
M1b2 A2b M3b2 . . 2\_744 99.98(4) ?  
M1b2 A2b P2b . . 4\_545 116.09(5) ?  
M1b2 A2b P1a . . 1\_544 51.37(3) ?

M1b2 A2b P1b . . 4\_545 90.21(4) ?  
M1b2 A2b A2a . . . 0 ?  
M1b2 A2b A1b . . 1\_545 47.76(4) ?  
M1b2 A2b A1b . . 1\_645 103.71(5) ?  
M1b2 A2b X2 . . 4\_545 105.54(8) ?  
M1b2 A2b O1a . . 1\_544 30.63(6) ?  
M1b2 A2b O1b . . 4\_545 76.43(7) ?  
M1b2 A2b O2a . . 1\_544 58.96(6) ?  
M1b2 A2b O3a . . 1\_544 69.66(6) ?  
M1b2 A2b O4b . . 4\_545 88.50(8) ?  
M1b2 A2b O5b . . 4\_545 104.26(7) ?  
M1b2 A2b O7b . . 4\_545 111.81(8) ?  
M1b2 A2b O9a . . 1\_645 127.84(8) ?  
M1b2 A2b O10b . . . 32.80(8) ?  
M1b2 A2b O11b . . . 32.72(7) ?  
M1b2 A2b O12a . . 4\_654 83.67(9) ?  
M1b2 A2b O13a . . 3\_756 156.57(8) ?  
M1b2 A2b O15a . . 3\_756 149.52(10) ?  
M1b2 A2b M2a1 4\_545 . 3\_756 76.90(3) ?  
M1b2 A2b M2a2 4\_545 . 3\_756 76.90(3) ?  
M1b2 A2b M2a3 4\_545 . 3\_756 76.90(3) ?  
M1b2 A2b M2b1 4\_545 . 4\_545 135.28(4) ?  
M1b2 A2b M2b2 4\_545 . 4\_545 135.28(4) ?  
M1b2 A2b M2b3 4\_545 . 4\_545 135.28(4) ?  
M1b2 A2b M3b1 4\_545 . 2\_744 83.52(3) ?  
M1b2 A2b M3b2 4\_545 . 2\_744 83.52(3) ?  
M1b2 A2b P2b 4\_545 . 4\_545 42.49(3) ?  
M1b2 A2b P1a 4\_545 . 1\_544 93.02(4) ?  
M1b2 A2b P1b 4\_545 . 4\_545 171.52(5) ?  
M1b2 A2b A2a 4\_545 . . 0 ?  
M1b2 A2b A1b 4\_545 . 1\_545 38.73(4) ?  
M1b2 A2b A1b 4\_545 . 1\_645 86.73(4) ?  
M1b2 A2b X2 4\_545 . 4\_545 112.54(8) ?  
M1b2 A2b O1a 4\_545 . 1\_544 82.80(7) ?  
M1b2 A2b O1b 4\_545 . 4\_545 148.08(8) ?  
M1b2 A2b O2a 4\_545 . 1\_544 116.46(7) ?  
M1b2 A2b O3a 4\_545 . 1\_544 79.70(6) ?  
M1b2 A2b O4b 4\_545 . 4\_545 164.78(8) ?  
M1b2 A2b O5b 4\_545 . 4\_545 20.14(6) ?  
M1b2 A2b O7b 4\_545 . 4\_545 59.29(8) ?  
M1b2 A2b O9a 4\_545 . 1\_645 53.00(7) ?  
M1b2 A2b O10b 4\_545 . . 58.08(8) ?  
M1b2 A2b O11b 4\_545 . . 118.93(8) ?  
M1b2 A2b O12a 4\_545 . 4\_654 98.42(9) ?  
M1b2 A2b O13a 4\_545 . 3\_756 97.41(7) ?  
M1b2 A2b O15a 4\_545 . 3\_756 117.20(10) ?  
M2a1 A2b M2a2 3\_756 . 3\_756 0 ?  
M2a1 A2b M2a3 3\_756 . 3\_756 0 ?  
M2a1 A2b M2b1 3\_756 . 4\_545 91.82(4) ?  
M2a1 A2b M2b2 3\_756 . 4\_545 91.82(4) ?  
M2a1 A2b M2b3 3\_756 . 4\_545 91.82(4) ?  
M2a1 A2b M3b1 3\_756 . 2\_744 62.41(3) ?  
M2a1 A2b M3b2 3\_756 . 2\_744 62.41(3) ?  
M2a1 A2b P2b 3\_756 . 4\_545 41.26(3) ?

M2a1 A2b P1a 3\_756 . 1\_544 112.75(5) ?  
M2a1 A2b P1b 3\_756 . 4\_545 108.51(4) ?  
M2a1 A2b A2a 3\_756 . . 0 ?  
M2a1 A2b A1b 3\_756 . 1\_545 112.94(4) ?  
M2a1 A2b A1b 3\_756 . 1\_645 91.59(4) ?  
M2a1 A2b X2 3\_756 . 4\_545 67.33(7) ?  
M2a1 A2b O1a 3\_756 . 1\_544 129.14(7) ?  
M2a1 A2b O1b 3\_756 . 4\_545 125.79(7) ?  
M2a1 A2b O2a 3\_756 . 1\_544 114.57(7) ?  
M2a1 A2b O3a 3\_756 . 1\_544 91.16(6) ?  
M2a1 A2b O4b 3\_756 . 4\_545 103.52(8) ?  
M2a1 A2b O5b 3\_756 . 4\_545 57.13(7) ?  
M2a1 A2b O7b 3\_756 . 4\_545 45.34(7) ?  
M2a1 A2b O9a 3\_756 . 1\_645 51.60(7) ?  
M2a1 A2b O10b 3\_756 . . 134.96(9) ?  
M2a1 A2b O11b 3\_756 . . 159.55(9) ?  
M2a1 A2b O12a 3\_756 . 4\_654 114.51(9) ?  
M2a1 A2b O13a 3\_756 . 3\_756 21.61(6) ?  
M2a1 A2b O15a 3\_756 . 3\_756 53.79(9) ?  
M2a2 A2b M2a3 3\_756 . 3\_756 0 ?  
M2a2 A2b M2b1 3\_756 . 4\_545 91.82(4) ?  
M2a2 A2b M2b2 3\_756 . 4\_545 91.82(4) ?  
M2a2 A2b M2b3 3\_756 . 4\_545 91.82(4) ?  
M2a2 A2b M3b1 3\_756 . 2\_744 62.41(3) ?  
M2a2 A2b M3b2 3\_756 . 2\_744 62.41(3) ?  
M2a2 A2b P2b 3\_756 . 4\_545 41.26(3) ?  
M2a2 A2b P1a 3\_756 . 1\_544 112.75(5) ?  
M2a2 A2b P1b 3\_756 . 4\_545 108.51(4) ?  
M2a2 A2b A2a 3\_756 . . 0 ?  
M2a2 A2b A1b 3\_756 . 1\_545 112.94(4) ?  
M2a2 A2b A1b 3\_756 . 1\_645 91.59(4) ?  
M2a2 A2b X2 3\_756 . 4\_545 67.33(7) ?  
M2a2 A2b O1a 3\_756 . 1\_544 129.14(7) ?  
M2a2 A2b O1b 3\_756 . 4\_545 125.79(7) ?  
M2a2 A2b O2a 3\_756 . 1\_544 114.57(7) ?  
M2a2 A2b O3a 3\_756 . 1\_544 91.16(6) ?  
M2a2 A2b O4b 3\_756 . 4\_545 103.52(8) ?  
M2a2 A2b O5b 3\_756 . 4\_545 57.13(7) ?  
M2a2 A2b O7b 3\_756 . 4\_545 45.34(7) ?  
M2a2 A2b O9a 3\_756 . 1\_645 51.60(7) ?  
M2a2 A2b O10b 3\_756 . . 134.96(9) ?  
M2a2 A2b O11b 3\_756 . . 159.55(9) ?  
M2a2 A2b O12a 3\_756 . 4\_654 114.51(9) ?  
M2a2 A2b O13a 3\_756 . 3\_756 21.61(6) ?  
M2a2 A2b O15a 3\_756 . 3\_756 53.79(9) ?  
M2a3 A2b M2b1 3\_756 . 4\_545 91.82(4) ?  
M2a3 A2b M2b2 3\_756 . 4\_545 91.82(4) ?  
M2a3 A2b M2b3 3\_756 . 4\_545 91.82(4) ?  
M2a3 A2b M3b1 3\_756 . 2\_744 62.41(3) ?  
M2a3 A2b M3b2 3\_756 . 2\_744 62.41(3) ?  
M2a3 A2b P2b 3\_756 . 4\_545 41.26(3) ?  
M2a3 A2b P1a 3\_756 . 1\_544 112.75(5) ?  
M2a3 A2b P1b 3\_756 . 4\_545 108.51(4) ?  
M2a3 A2b A2a 3\_756 . . 0 ?

M2a3 A2b A1b 3\_756 . 1\_545 112.94(4) ?  
M2a3 A2b A1b 3\_756 . 1\_645 91.59(4) ?  
M2a3 A2b X2 3\_756 . 4\_545 67.33(7) ?  
M2a3 A2b O1a 3\_756 . 1\_544 129.14(7) ?  
M2a3 A2b O1b 3\_756 . 4\_545 125.79(7) ?  
M2a3 A2b O2a 3\_756 . 1\_544 114.57(7) ?  
M2a3 A2b O3a 3\_756 . 1\_544 91.16(6) ?  
M2a3 A2b O4b 3\_756 . 4\_545 103.52(8) ?  
M2a3 A2b O5b 3\_756 . 4\_545 57.13(7) ?  
M2a3 A2b O7b 3\_756 . 4\_545 45.34(7) ?  
M2a3 A2b O9a 3\_756 . 1\_645 51.60(7) ?  
M2a3 A2b O10b 3\_756 . . 134.96(9) ?  
M2a3 A2b O11b 3\_756 . . 159.55(9) ?  
M2a3 A2b O12a 3\_756 . 4\_654 114.51(9) ?  
M2a3 A2b O13a 3\_756 . 3\_756 21.61(6) ?  
M2a3 A2b O15a 3\_756 . 3\_756 53.79(9) ?  
M2b1 A2b M2b2 4\_545 . 4\_545 0 ?  
M2b1 A2b M2b3 4\_545 . 4\_545 0 ?  
M2b1 A2b M3b1 4\_545 . 2\_744 53.70(3) ?  
M2b1 A2b M3b2 4\_545 . 2\_744 53.70(3) ?  
M2b1 A2b P2b 4\_545 . 4\_545 103.30(5) ?  
M2b1 A2b P1a 4\_545 . 1\_544 51.45(3) ?  
M2b1 A2b P1b 4\_545 . 4\_545 52.22(3) ?  
M2b1 A2b A2a 4\_545 . . 0 ?  
M2b1 A2b A1b 4\_545 . 1\_545 118.20(5) ?  
M2b1 A2b A1b 4\_545 . 1\_645 137.34(5) ?  
M2b1 A2b X2 4\_545 . 4\_545 28.36(7) ?  
M2b1 A2b O1a 4\_545 . 1\_544 71.22(7) ?  
M2b1 A2b O1b 4\_545 . 4\_545 71.76(7) ?  
M2b1 A2b O2a 4\_545 . 1\_544 31.73(6) ?  
M2b1 A2b O3a 4\_545 . 1\_544 57.10(6) ?  
M2b1 A2b O4b 4\_545 . 4\_545 30.16(7) ?  
M2b1 A2b O5b 4\_545 . 4\_545 125.41(8) ?  
M2b1 A2b O7b 4\_545 . 4\_545 81.90(8) ?  
M2b1 A2b O9a 4\_545 . 1\_645 142.48(8) ?  
M2b1 A2b O10b 4\_545 . . 120.21(9) ?  
M2b1 A2b O11b 4\_545 . . 67.87(8) ?  
M2b1 A2b O12a 4\_545 . 4\_654 125.15(9) ?  
M2b1 A2b O13a 4\_545 . 3\_756 72.28(7) ?  
M2b1 A2b O15a 4\_545 . 3\_756 87.02(10) ?  
M2b2 A2b M2b3 4\_545 . 4\_545 0 ?  
M2b2 A2b M3b1 4\_545 . 2\_744 53.70(3) ?  
M2b2 A2b M3b2 4\_545 . 2\_744 53.70(3) ?  
M2b2 A2b P2b 4\_545 . 4\_545 103.30(5) ?  
M2b2 A2b P1a 4\_545 . 1\_544 51.45(3) ?  
M2b2 A2b P1b 4\_545 . 4\_545 52.22(3) ?  
M2b2 A2b A2a 4\_545 . . 0 ?  
M2b2 A2b A1b 4\_545 . 1\_545 118.20(5) ?  
M2b2 A2b A1b 4\_545 . 1\_645 137.34(5) ?  
M2b2 A2b X2 4\_545 . 4\_545 28.36(7) ?  
M2b2 A2b O1a 4\_545 . 1\_544 71.22(7) ?  
M2b2 A2b O1b 4\_545 . 4\_545 71.76(7) ?  
M2b2 A2b O2a 4\_545 . 1\_544 31.73(6) ?  
M2b2 A2b O3a 4\_545 . 1\_544 57.10(6) ?

M2b2 A2b O4b 4\_545 . 4\_545 30.16(7) ?  
M2b2 A2b O5b 4\_545 . 4\_545 125.41(8) ?  
M2b2 A2b O7b 4\_545 . 4\_545 81.90(8) ?  
M2b2 A2b O9a 4\_545 . 1\_645 142.48(8) ?  
M2b2 A2b O10b 4\_545 . . 120.21(9) ?  
M2b2 A2b O11b 4\_545 . . 67.87(8) ?  
M2b2 A2b O12a 4\_545 . 4\_654 125.15(9) ?  
M2b2 A2b O13a 4\_545 . 3\_756 72.28(7) ?  
M2b2 A2b O15a 4\_545 . 3\_756 87.02(10) ?  
M2b3 A2b M3b1 4\_545 . 2\_744 53.70(3) ?  
M2b3 A2b M3b2 4\_545 . 2\_744 53.70(3) ?  
M2b3 A2b P2b 4\_545 . 4\_545 103.30(5) ?  
M2b3 A2b P1a 4\_545 . 1\_544 51.45(3) ?  
M2b3 A2b P1b 4\_545 . 4\_545 52.22(3) ?  
M2b3 A2b A2a 4\_545 . . 0 ?  
M2b3 A2b A1b 4\_545 . 1\_545 118.20(5) ?  
M2b3 A2b A1b 4\_545 . 1\_645 137.34(5) ?  
M2b3 A2b X2 4\_545 . 4\_545 28.36(7) ?  
M2b3 A2b O1a 4\_545 . 1\_544 71.22(7) ?  
M2b3 A2b O1b 4\_545 . 4\_545 71.76(7) ?  
M2b3 A2b O2a 4\_545 . 1\_544 31.73(6) ?  
M2b3 A2b O3a 4\_545 . 1\_544 57.10(6) ?  
M2b3 A2b O4b 4\_545 . 4\_545 30.16(7) ?  
M2b3 A2b O5b 4\_545 . 4\_545 125.41(8) ?  
M2b3 A2b O7b 4\_545 . 4\_545 81.90(8) ?  
M2b3 A2b O9a 4\_545 . 1\_645 142.48(8) ?  
M2b3 A2b O10b 4\_545 . . 120.21(9) ?  
M2b3 A2b O11b 4\_545 . . 67.87(8) ?  
M2b3 A2b O12a 4\_545 . 4\_654 125.15(9) ?  
M2b3 A2b O13a 4\_545 . 3\_756 72.28(7) ?  
M2b3 A2b O15a 4\_545 . 3\_756 87.02(10) ?  
M3b1 A2b M3b2 2\_744 . 2\_744 0 ?  
M3b1 A2b P2b 2\_744 . 4\_545 51.13(3) ?  
M3b1 A2b P1a 2\_744 . 1\_544 50.36(3) ?  
M3b1 A2b P1b 2\_744 . 4\_545 104.71(5) ?  
M3b1 A2b A2a 2\_744 . . 0 ?  
M3b1 A2b A1b 2\_744 . 1\_545 88.25(4) ?  
M3b1 A2b A1b 2\_744 . 1\_645 153.69(4) ?  
M3b1 A2b X2 2\_744 . 4\_545 29.40(7) ?  
M3b1 A2b O1a 2\_744 . 1\_544 69.36(6) ?  
M3b1 A2b O1b 2\_744 . 4\_545 125.46(8) ?  
M3b1 A2b O2a 2\_744 . 1\_544 57.01(6) ?  
M3b1 A2b O3a 2\_744 . 1\_544 30.42(6) ?  
M3b1 A2b O4b 2\_744 . 4\_545 83.31(8) ?  
M3b1 A2b O5b 2\_744 . 4\_545 71.77(7) ?  
M3b1 A2b O7b 2\_744 . 4\_545 29.34(7) ?  
M3b1 A2b O9a 2\_744 . 1\_645 105.19(8) ?  
M3b1 A2b O10b 2\_744 . . 109.91(9) ?  
M3b1 A2b O11b 2\_744 . . 104.43(8) ?  
M3b1 A2b O12a 2\_744 . 4\_654 175.99(9) ?  
M3b1 A2b O13a 2\_744 . 3\_756 57.81(7) ?  
M3b1 A2b O15a 2\_744 . 3\_756 101.69(10) ?  
M3b2 A2b P2b 2\_744 . 4\_545 51.13(3) ?  
M3b2 A2b P1a 2\_744 . 1\_544 50.36(3) ?

M3b2 A2b P1b 2\_744 . 4\_545 104.71(5) ?  
M3b2 A2b A2a 2\_744 . . 0 ?  
M3b2 A2b A1b 2\_744 . 1\_545 88.25(4) ?  
M3b2 A2b A1b 2\_744 . 1\_645 153.69(4) ?  
M3b2 A2b X2 2\_744 . 4\_545 29.40(7) ?  
M3b2 A2b O1a 2\_744 . 1\_544 69.36(6) ?  
M3b2 A2b O1b 2\_744 . 4\_545 125.46(8) ?  
M3b2 A2b O2a 2\_744 . 1\_544 57.01(6) ?  
M3b2 A2b O3a 2\_744 . 1\_544 30.42(6) ?  
M3b2 A2b O4b 2\_744 . 4\_545 83.31(8) ?  
M3b2 A2b O5b 2\_744 . 4\_545 71.77(7) ?  
M3b2 A2b O7b 2\_744 . 4\_545 29.34(7) ?  
M3b2 A2b O9a 2\_744 . 1\_645 105.19(8) ?  
M3b2 A2b O10b 2\_744 . . 109.91(9) ?  
M3b2 A2b O11b 2\_744 . . 104.43(8) ?  
M3b2 A2b O12a 2\_744 . 4\_654 175.99(9) ?  
M3b2 A2b O13a 2\_744 . 3\_756 57.81(7) ?  
M3b2 A2b O15a 2\_744 . 3\_756 101.69(10) ?  
P2b A2b P1a 4\_545 . 1\_544 89.09(5) ?  
P2b A2b P1b 4\_545 . 4\_545 145.24(6) ?  
P2b A2b A2a 4\_545 . . 0 ?  
P2b A2b A1b 4\_545 . 1\_545 72.70(4) ?  
P2b A2b A1b 4\_545 . 1\_645 106.99(5) ?  
P2b A2b X2 4\_545 . 4\_545 75.40(8) ?  
P2b A2b O1a 4\_545 . 1\_544 95.12(7) ?  
P2b A2b O1b 4\_545 . 4\_545 166.86(8) ?  
P2b A2b O2a 4\_545 . 1\_544 105.29(7) ?  
P2b A2b O3a 4\_545 . 1\_544 66.50(7) ?  
P2b A2b O4b 4\_545 . 4\_545 129.75(9) ?  
P2b A2b O5b 4\_545 . 4\_545 23.84(7) ?  
P2b A2b O7b 4\_545 . 4\_545 21.82(7) ?  
P2b A2b O9a 4\_545 . 1\_645 56.71(7) ?  
P2b A2b O10b 4\_545 . . 97.24(9) ?  
P2b A2b O11b 4\_545 . . 143.24(9) ?  
P2b A2b O12a 4\_545 . 4\_654 128.66(9) ?  
P2b A2b O13a 4\_545 . 3\_756 57.82(7) ?  
P2b A2b O15a 4\_545 . 3\_756 94.24(10) ?  
P1a A2b P1b 1\_544 . 4\_545 90.81(5) ?  
P1a A2b A2a 1\_544 . . 0 ?  
P1a A2b A1b 1\_544 . 1\_545 66.75(4) ?  
P1a A2b A1b 1\_544 . 1\_645 154.98(5) ?  
P1a A2b X2 1\_544 . 4\_545 56.09(7) ?  
P1a A2b O1a 1\_544 . 1\_544 22.77(6) ?  
P1a A2b O1b 1\_544 . 4\_545 96.64(7) ?  
P1a A2b O2a 1\_544 . 1\_544 23.48(6) ?  
P1a A2b O3a 1\_544 . 1\_544 23.16(6) ?  
P1a A2b O4b 1\_544 . 4\_545 72.64(8) ?  
P1a A2b O5b 1\_544 . 4\_545 97.07(7) ?  
P1a A2b O7b 1\_544 . 4\_545 72.18(8) ?  
P1a A2b O9a 1\_544 . 1\_645 143.01(8) ?  
P1a A2b O10b 1\_544 . . 73.81(9) ?  
P1a A2b O11b 1\_544 . . 56.86(8) ?  
P1a A2b O12a 1\_544 . 4\_654 132.72(9) ?  
P1a A2b O13a 1\_544 . 3\_756 105.23(8) ?

P1a A2b O15a 1\_544 . 3\_756 137.75(11) ?  
 P1b A2b A2a 4\_545 . . 0 ?  
 P1b A2b A1b 4\_545 . 1\_545 137.87(5) ?  
 P1b A2b A1b 4\_545 . 1\_645 86.59(5) ?  
 P1b A2b X2 4\_545 . 4\_545 75.84(8) ?  
 P1b A2b O1a 4\_545 . 1\_544 98.07(7) ?  
 P1b A2b O1b 4\_545 . 4\_545 23.58(7) ?  
 P1b A2b O2a 4\_545 . 1\_544 67.78(7) ?  
 P1b A2b O3a 4\_545 . 1\_544 106.32(7) ?  
 P1b A2b O4b 4\_545 . 4\_545 22.11(7) ?  
 P1b A2b O5b 4\_545 . 4\_545 165.46(8) ?  
 P1b A2b O7b 4\_545 . 4\_545 129.17(9) ?  
 P1b A2b O9a 4\_545 . 1\_645 124.96(8) ?  
 P1b A2b O10b 4\_545 . . 116.05(9) ?  
 P1b A2b O11b 4\_545 . . 57.57(8) ?  
 P1b A2b O12a 4\_545 . 4\_654 73.49(8) ?  
 P1b A2b O13a 4\_545 . 3\_756 88.86(8) ?  
 P1b A2b O15a 4\_545 . 3\_756 63.68(9) ?  
 A2a A2b A1b . . 1\_545 0 ?  
 A2a A2b A1b . . 1\_645 0 ?  
 A2a A2b X2 . . 4\_545 0 ?  
 A2a A2b O1a . . 1\_544 0 ?  
 A2a A2b O1b . . 4\_545 0 ?  
 A2a A2b O2a . . 1\_544 0 ?  
 A2a A2b O3a . . 1\_544 0 ?  
 A2a A2b O4b . . 4\_545 0 ?  
 A2a A2b O5b . . 4\_545 0 ?  
 A2a A2b O7b . . 4\_545 0 ?  
 A2a A2b O9a . . 1\_645 0 ?  
 A2a A2b O10b . . . 0 ?  
 A2a A2b O11b . . . 0 ?  
 A2a A2b O12a . . 4\_654 0 ?  
 A2a A2b O13a . . 3\_756 0 ?  
 A2a A2b O15a . . 3\_756 0 ?  
 A1b A2b A1b 1\_545 . 1\_645 99.25(5) ?  
 A1b A2b X2 1\_545 . 4\_545 113.60(8) ?  
 A1b A2b O1a 1\_545 . 1\_544 48.81(7) ?  
 A1b A2b O1b 1\_545 . 4\_545 120.43(8) ?  
 A1b A2b O2a 1\_545 . 1\_544 88.13(7) ?  
 A1b A2b O3a 1\_545 . 1\_544 66.31(7) ?  
 A1b A2b O4b 1\_545 . 4\_545 133.11(8) ?  
 A1b A2b O5b 1\_545 . 4\_545 56.67(7) ?  
 A1b A2b O7b 1\_545 . 4\_545 79.12(8) ?  
 A1b A2b O9a 1\_545 . 1\_645 87.92(8) ?  
 A1b A2b O10b 1\_545 . . 25.69(8) ?  
 A1b A2b O11b 1\_545 . . 80.49(8) ?  
 A1b A2b O12a 1\_545 . 4\_654 95.46(9) ?  
 A1b A2b O13a 1\_545 . 3\_756 130.25(8) ?  
 A1b A2b O15a 1\_545 . 3\_756 153.34(10) ?  
 A1b A2b X2 1\_645 . 4\_545 145.71(8) ?  
 A1b A2b O1a 1\_645 . 1\_544 133.45(7) ?  
 A1b A2b O1b 1\_645 . 4\_545 71.94(7) ?  
 A1b A2b O2a 1\_645 . 1\_544 147.64(7) ?  
 A1b A2b O3a 1\_645 . 1\_544 165.16(7) ?

A1b A2b 04b 1\_645 . 4\_545 108.41(8) ?  
A1b A2b 05b 1\_645 . 4\_545 91.27(7) ?  
A1b A2b 07b 1\_645 . 4\_545 127.42(8) ?  
A1b A2b 09a 1\_645 . 1\_645 50.47(7) ?  
A1b A2b 010b 1\_645 . . 85.01(9) ?  
A1b A2b 011b 1\_645 . . 101.68(8) ?  
A1b A2b 012a 1\_645 . 4\_654 23.93(8) ?  
A1b A2b 013a 1\_645 . 3\_756 99.60(7) ?  
A1b A2b 015a 1\_645 . 3\_756 61.67(10) ?  
X2 A2b 01a 4\_545 . 1\_544 78.85(9) ?  
X2 A2b 01b 4\_545 . 4\_545 98.00(10) ?  
X2 A2b 02a 4\_545 . 1\_544 47.92(9) ?  
X2 A2b 03a 4\_545 . 1\_544 47.71(9) ?  
X2 A2b 04b 4\_545 . 4\_545 55.36(10) ?  
X2 A2b 05b 4\_545 . 4\_545 98.46(10) ?  
X2 A2b 07b 4\_545 . 4\_545 54.66(10) ?  
X2 A2b 09a 4\_545 . 1\_645 118.70(11) ?  
X2 A2b 010b 4\_545 . . 129.13(12) ?  
X2 A2b 011b 4\_545 . . 93.48(11) ?  
X2 A2b 012a 4\_545 . 4\_654 147.98(12) ?  
X2 A2b 013a 4\_545 . 3\_756 51.67(9) ?  
X2 A2b 015a 4\_545 . 3\_756 84.09(12) ?  
01a A2b 01b 1\_544 . 4\_545 94.69(9) ?  
01a A2b 02a 1\_544 . 1\_544 39.80(8) ?  
01a A2b 03a 1\_544 . 1\_544 39.05(8) ?  
01a A2b 04b 1\_544 . 4\_545 85.44(10) ?  
01a A2b 05b 1\_544 . 4\_545 93.84(9) ?  
01a A2b 07b 1\_544 . 4\_545 84.25(10) ?  
01a A2b 09a 1\_544 . 1\_645 135.60(10) ?  
01a A2b 010b 1\_544 . . 51.29(10) ?  
01a A2b 011b 1\_544 . . 48.13(9) ?  
01a A2b 012a 1\_544 . 4\_654 114.29(11) ?  
01a A2b 013a 1\_544 . 3\_756 126.65(9) ?  
01a A2b 015a 1\_544 . 3\_756 157.77(12) ?  
01b A2b 02a 4\_545 . 1\_544 77.14(9) ?  
01b A2b 03a 4\_545 . 1\_544 117.57(9) ?  
01b A2b 04b 4\_545 . 4\_545 42.65(10) ?  
01b A2b 05b 4\_545 . 4\_545 162.65(10) ?  
01b A2b 07b 4\_545 . 4\_545 152.40(11) ?  
01b A2b 09a 4\_545 . 1\_645 119.84(10) ?  
01b A2b 010b 4\_545 . . 95.71(11) ?  
01b A2b 011b 4\_545 . . 47.10(9) ?  
01b A2b 012a 4\_545 . 4\_654 53.62(10) ?  
01b A2b 013a 4\_545 . 3\_756 109.14(10) ?  
01b A2b 015a 4\_545 . 3\_756 73.58(11) ?  
02a A2b 03a 1\_544 . 1\_544 40.52(8) ?  
02a A2b 04b 1\_544 . 4\_545 49.17(9) ?  
02a A2b 05b 1\_544 . 4\_545 118.44(9) ?  
02a A2b 07b 1\_544 . 4\_545 84.87(10) ?  
02a A2b 09a 1\_544 . 1\_645 161.89(10) ?  
02a A2b 010b 1\_544 . . 88.80(10) ?  
02a A2b 011b 1\_544 . . 48.23(9) ?  
02a A2b 012a 1\_544 . 4\_654 124.50(10) ?  
02a A2b 013a 1\_544 . 3\_756 99.31(9) ?



02a A2b 015a 1\_544 . 3\_756 118.09(12) ?  
 03a A2b 04b 1\_544 . 4\_545 85.08(10) ?  
 03a A2b 05b 1\_544 . 4\_545 78.03(9) ?  
 03a A2b 07b 1\_544 . 4\_545 49.03(9) ?  
 03a A2b 09a 1\_544 . 1\_645 122.46(9) ?  
 03a A2b 010b 1\_544 . . 82.73(10) ?  
 03a A2b 011b 1\_544 . . 80.00(9) ?  
 03a A2b 012a 1\_544 . 4\_654 153.32(11) ?  
 03a A2b 013a 1\_544 . 3\_756 88.17(9) ?  
 03a A2b 015a 1\_544 . 3\_756 130.42(12) ?  
 04b A2b 05b 4\_545 . 4\_545 153.50(11) ?  
 04b A2b 07b 4\_545 . 4\_545 109.96(11) ?  
 04b A2b 09a 4\_545 . 1\_645 138.77(11) ?  
 04b A2b 010b 4\_545 . . 120.17(11) ?  
 04b A2b 011b 4\_545 . . 57.64(10) ?  
 04b A2b 012a 4\_545 . 4\_654 95.21(11) ?  
 04b A2b 013a 4\_545 . 3\_756 81.94(10) ?  
 04b A2b 015a 4\_545 . 3\_756 73.11(12) ?  
 05b A2b 07b 4\_545 . 4\_545 43.82(10) ?  
 05b A2b 09a 4\_545 . 1\_645 45.96(9) ?  
 05b A2b 010b 4\_545 . . 78.02(10) ?  
 05b A2b 011b 4\_545 . . 136.80(10) ?  
 05b A2b 012a 4\_545 . 4\_654 109.04(11) ?  
 05b A2b 013a 4\_545 . 3\_756 77.30(9) ?  
 05b A2b 015a 4\_545 . 3\_756 102.73(11) ?  
 07b A2b 09a 4\_545 . 1\_645 77.03(10) ?  
 07b A2b 010b 4\_545 . . 104.75(12) ?  
 07b A2b 011b 4\_545 . . 129.03(11) ?  
 07b A2b 012a 4\_545 . 4\_654 150.21(12) ?  
 07b A2b 013a 4\_545 . 3\_756 53.11(10) ?  
 07b A2b 015a 4\_545 . 3\_756 97.45(12) ?  
 09a A2b 010b 1\_645 . . 95.21(11) ?  
 09a A2b 011b 1\_645 . . 147.74(11) ?  
 09a A2b 012a 1\_645 . 4\_654 73.50(10) ?  
 09a A2b 013a 1\_645 . 3\_756 70.22(10) ?  
 09a A2b 015a 1\_645 . 3\_756 65.67(11) ?  
 010b A2b 011b . . . 62.58(11) ?  
 010b A2b 012a . . 4\_654 74.06(12) ?  
 010b A2b 013a . . 3\_756 154.98(11) ?  
 010b A2b 015a . . 3\_756 146.64(14) ?  
 011b A2b 012a . . 4\_654 77.75(11) ?  
 011b A2b 013a . . 3\_756 138.49(11) ?  
 011b A2b 015a . . 3\_756 119.77(12) ?  
 012a A2b 013a 4\_654 . 3\_756 118.34(11) ?  
 012a A2b 015a 4\_654 . 3\_756 74.31(13) ?  
 013a A2b 015a 3\_756 . 3\_756 45.75(11) ?  
 M2a1 X1 M2a2 . . . 0 ?  
 M2a1 X1 M2a3 . . . 0 ?  
 M2a1 X1 M3a1 . . . 134.6(2) ?  
 M2a1 X1 M3a2 . . . 134.6(2) ?  
 M2a1 X1 A1b . . 4\_565 96.86(14) ?  
 M2a2 X1 M2a3 . . . 0 ?  
 M2a2 X1 M3a1 . . . 134.6(2) ?  
 M2a2 X1 M3a2 . . . 134.6(2) ?

M2a2 X1 A1b . . 4\_565 96.86(14) ?  
M2a3 X1 M3a1 . . . 134.6(2) ?  
M2a3 X1 M3a2 . . . 134.6(2) ?  
M2a3 X1 A1b . . 4\_565 96.86(14) ?  
M3a1 X1 M3a2 . . . 0 ?  
M3a1 X1 A1b . . 4\_565 97.64(14) ?  
M3a2 X1 A1b . . 4\_565 97.64(14) ?  
M2b1 X2 M2b2 . . . 0 ?  
M2b1 X2 M2b3 . . . 0 ?  
M2b1 X2 M3b1 . . . 135.6(2) ?  
M2b1 X2 M3b2 . . . 135.6(2) ?  
M2b1 X2 A2b . . 4\_544 97.93(13) ?  
M2b2 X2 M2b3 . . . 0 ?  
M2b2 X2 M3b1 . . . 135.6(2) ?  
M2b2 X2 M3b2 . . . 135.6(2) ?  
M2b2 X2 A2b . . 4\_544 97.93(13) ?  
M2b3 X2 M3b1 . . . 135.6(2) ?  
M2b3 X2 M3b2 . . . 135.6(2) ?  
M2b3 X2 A2b . . 4\_544 97.93(13) ?  
M3b1 X2 M3b2 . . . 0 ?  
M3b1 X2 A2b . . 4\_544 98.40(13) ?  
M3b2 X2 A2b . . 4\_544 98.40(13) ?  
M1b1 O1a M1b2 1\_566 . 1\_566 0 ?  
M1b1 O1a P1a 1\_566 . . 144.3(2) ?  
M1b1 O1a A1b 1\_566 . 4\_565 96.89(13) ?  
M1b1 O1a A2b 1\_566 . 1\_566 79.46(11) ?  
M1b2 O1a P1a 1\_566 . . 144.3(2) ?  
M1b2 O1a A1b 1\_566 . 4\_565 96.89(13) ?  
M1b2 O1a A2b 1\_566 . 1\_566 79.46(11) ?  
P1a O1a A1b . . 4\_565 82.06(15) ?  
P1a O1a A2b . . 1\_566 82.34(15) ?  
A1b O1a A2b 4\_565 . 1\_566 146.82(12) ?  
M1a1 O1b M1a2 1\_644 . 1\_644 0 ?  
M1a1 O1b P1b 1\_644 . . 145.5(2) ?  
M1a1 O1b A1b 1\_644 . 1\_644 79.94(12) ?  
M1a1 O1b A2b 1\_644 . 4\_544 96.77(13) ?  
M1a2 O1b P1b 1\_644 . . 145.5(2) ?  
M1a2 O1b A1b 1\_644 . 1\_644 79.94(12) ?  
M1a2 O1b A2b 1\_644 . 4\_544 96.77(13) ?  
P1b O1b A1b . . 1\_644 81.47(16) ?  
P1b O1b A2b . . 4\_544 83.42(16) ?  
A1b O1b A2b 1\_644 . 4\_544 146.88(12) ?  
M2b1 O2a M2b2 4\_556 . 4\_556 0 ?  
M2b1 O2a M2b3 4\_556 . 4\_556 0 ?  
M2b1 O2a P1a 4\_556 . . 137.3(2) ?  
M2b1 O2a A2b 4\_556 . 1\_566 80.17(10) ?  
M2b2 O2a M2b3 4\_556 . 4\_556 0 ?  
M2b2 O2a P1a 4\_556 . . 137.3(2) ?  
M2b2 O2a A2b 4\_556 . 1\_566 80.17(10) ?  
M2b3 O2a P1a 4\_556 . . 137.3(2) ?  
M2b3 O2a A2b 4\_556 . 1\_566 80.17(10) ?  
P1a O2a A2b . . 1\_566 89.07(15) ?  
M2a1 O2b M2a2 4\_653 . 4\_653 0 ?  
M2a1 O2b M2a3 4\_653 . 4\_653 0 ?

M2a1 02b P1b 4\_653 . . 137.5(2) ?  
M2a1 02b A1b 4\_653 . 1\_644 81.05(12) ?  
M2a2 02b M2a3 4\_653 . 4\_653 0 ?  
M2a2 02b P1b 4\_653 . . 137.5(2) ?  
M2a2 02b A1b 4\_653 . 1\_644 81.05(12) ?  
M2a3 02b P1b 4\_653 . . 137.5(2) ?  
M2a3 02b A1b 4\_653 . 1\_644 81.05(12) ?  
P1b 02b A1b . . 1\_644 87.68(15) ?  
M3b1 03a M3b2 2\_755 . 2\_755 0 ?  
M3b1 03a P1a 2\_755 . . 138.9(2) ?  
M3b1 03a A2b 2\_755 . 1\_566 80.40(10) ?  
M3b2 03a P1a 2\_755 . . 138.9(2) ?  
M3b2 03a A2b 2\_755 . 1\_566 80.40(10) ?  
P1a 03a A2b . . 1\_566 85.93(14) ?  
M3a1 03b M3a2 2\_744 . 2\_744 0 ?  
M3a1 03b P1b 2\_744 . . 138.9(2) ?  
M3a1 03b A1b 2\_744 . 1\_644 82.23(12) ?  
M3a2 03b P1b 2\_744 . . 138.9(2) ?  
M3a2 03b A1b 2\_744 . 1\_644 82.23(12) ?  
P1b 03b A1b . . 1\_644 86.48(16) ?  
M2a1 04a M2a2 . . . 0 ?  
M2a1 04a M2a3 . . . 0 ?  
M2a1 04a P1a . . . 141.6(2) ?  
M2a1 04a A1b . . 4\_565 104.23(15) ?  
M2a2 04a M2a3 . . . 0 ?  
M2a2 04a P1a . . . 141.6(2) ?  
M2a2 04a A1b . . 4\_565 104.23(15) ?  
M2a3 04a P1a . . . 141.6(2) ?  
M2a3 04a A1b . . 4\_565 104.23(15) ?  
P1a 04a A1b . . 4\_565 114.14(19) ?  
M2b1 04b M2b2 . . . 0 ?  
M2b1 04b M2b3 . . . 0 ?  
M2b1 04b P1b . . . 145.0(2) ?  
M2b1 04b A2b . . 4\_544 101.78(14) ?  
M2b2 04b M2b3 . . . 0 ?  
M2b2 04b P1b . . . 145.0(2) ?  
M2b2 04b A2b . . 4\_544 101.78(14) ?  
M2b3 04b P1b . . . 145.0(2) ?  
M2b3 04b A2b . . 4\_544 101.78(14) ?  
P1b 04b A2b . . 4\_544 112.90(18) ?  
M1a1 05a M1a2 . . . 0 ?  
M1a1 05a P2a . . . 143.7(2) ?  
M1a1 05a A1b . . 4\_565 120.38(15) ?  
M1a2 05a P2a . . . 143.7(2) ?  
M1a2 05a A1b . . 4\_565 120.38(15) ?  
P2a 05a A1b . . 4\_565 82.89(16) ?  
M1b1 05b M1b2 . . . 0 ?  
M1b1 05b P2b . . . 142.9(2) ?  
M1b1 05b A2b . . 4\_544 122.75(15) ?  
M1b2 05b P2b . . . 142.9(2) ?  
M1b2 05b A2b . . 4\_544 122.75(15) ?  
P2b 05b A2b . . 4\_544 82.62(15) ?  
M2a1 06a M2a2 3\_666 . 3\_666 0 ?  
M2a1 06a M2a3 3\_666 . 3\_666 0 ?

M2a1 06a P2a 3\_666 . . 137.4(2) ?  
M2a2 06a M2a3 3\_666 . 3\_666 0 ?  
M2a2 06a P2a 3\_666 . . 137.4(2) ?  
M2a3 06a P2a 3\_666 . . 137.4(2) ?  
M2b1 06b M2b2 3\_754 . 3\_754 0 ?  
M2b1 06b M2b3 3\_754 . 3\_754 0 ?  
M2b1 06b P2b 3\_754 . . 136.7(2) ?  
M2b2 06b M2b3 3\_754 . 3\_754 0 ?  
M2b2 06b P2b 3\_754 . . 136.7(2) ?  
M2b3 06b P2b 3\_754 . . 136.7(2) ?  
M3a1 07a M3a2 . . . 0 ?  
M3a1 07a P2a . . . 139.0(2) ?  
M3a1 07a A1b . . 4\_565 105.52(14) ?  
M3a2 07a P2a . . . 139.0(2) ?  
M3a2 07a A1b . . 4\_565 105.52(14) ?  
P2a 07a A1b . . 4\_565 114.96(19) ?  
M3b1 07b M3b2 . . . 0 ?  
M3b1 07b P2b . . . 138.2(2) ?  
M3b1 07b A2b . . 4\_544 106.63(14) ?  
M3b2 07b P2b . . . 138.2(2) ?  
M3b2 07b A2b . . 4\_544 106.63(14) ?  
P2b 07b A2b . . 4\_544 115.04(18) ?  
M2b1 08a M2b2 2\_754 . 2\_754 0 ?  
M2b1 08a M2b3 2\_754 . 2\_754 0 ?  
M2b1 08a P2a 2\_754 . . 145.6(2) ?  
M2b2 08a M2b3 2\_754 . 2\_754 0 ?  
M2b2 08a P2a 2\_754 . . 145.6(2) ?  
M2b3 08a P2a 2\_754 . . 145.6(2) ?  
M2a1 08b M2a2 2\_745 . 2\_745 0 ?  
M2a1 08b M2a3 2\_745 . 2\_745 0 ?  
M2a1 08b P2b 2\_745 . . 145.2(2) ?  
M2a2 08b M2a3 2\_745 . 2\_745 0 ?  
M2a2 08b P2b 2\_745 . . 145.2(2) ?  
M2a3 08b P2b 2\_745 . . 145.2(2) ?  
M1a1 09a M1a2 . . . 0 ?  
M1a1 09a A2b . . 1\_465 138.68(16) ?  
M1a2 09a A2b . . 1\_465 138.68(16) ?  
M1b1 09b M1b2 . . . 0 ?  
M1b1 09b A1b . . 1\_545 138.48(17) ?  
M1b2 09b A1b . . 1\_545 138.48(17) ?  
M1a1 010a M1a2 . . . 0 ?  
M1a1 010a A1b . . . 106.29(16) ?  
M1a2 010a A1b . . . 106.29(16) ?  
M1b1 010b M1b2 . . . 0 ?  
M1b1 010b A2b . . . 104.93(15) ?  
M1b2 010b A2b . . . 104.93(15) ?  
M1a1 011a M1a2 . . . 0 ?  
M1a1 011a A1b . . . 88.89(13) ?  
M1a2 011a A1b . . . 88.89(13) ?  
M1b1 011b M1b2 . . . 0 ?  
M1b1 011b A2b . . . 92.38(13) ?  
M1b2 011b A2b . . . 92.38(13) ?  
M1a1 012a M1a2 . . . 0 ?  
M1a1 012a A2b . . 4\_455 118.22(16) ?

M1a2 O12a A2b . . 4\_455 118.22(16) ?  
M1b1 O12b M1b2 . . . 0 ?  
M1b1 O12b A1b . . 4\_554 116.66(16) ?  
M1b2 O12b A1b . . 4\_554 116.66(16) ?  
M2a1 O13a M2a2 . . . 0 ?  
M2a1 O13a M2a3 . . . 0 ?  
M2a1 O13a A2b . . 3\_756 117.75(14) ?  
M2a2 O13a M2a3 . . . 0 ?  
M2a2 O13a A2b . . 3\_756 117.75(14) ?  
M2a3 O13a A2b . . 3\_756 117.75(14) ?  
M2b1 O13b M2b2 . . . 0 ?  
M2b1 O13b M2b3 . . . 0 ?  
M2b1 O13b A1b . . 3\_764 119.94(14) ?  
M2b2 O13b M2b3 . . . 0 ?  
M2b2 O13b A1b . . 3\_764 119.94(14) ?  
M2b3 O13b A1b . . 3\_764 119.94(14) ?

loop\_

\_geom\_torsion\_atom\_site\_label\_1  
\_geom\_torsion\_atom\_site\_label\_2  
\_geom\_torsion\_atom\_site\_label\_3  
\_geom\_torsion\_atom\_site\_label\_4  
\_geom\_torsion\_site\_symmetry\_1  
\_geom\_torsion\_site\_symmetry\_2  
\_geom\_torsion\_site\_symmetry\_3  
\_geom\_torsion\_site\_symmetry\_4  
\_geom\_torsion  
\_geom\_torsion\_publ\_flag  
? ? ? ? ? ? ? ? ? ?

loop\_

\_geom\_hbond\_atom\_site\_label\_D  
\_geom\_hbond\_atom\_site\_label\_H  
\_geom\_hbond\_atom\_site\_label\_A  
\_geom\_hbond\_site\_symmetry\_D  
\_geom\_hbond\_site\_symmetry\_H  
\_geom\_hbond\_site\_symmetry\_A  
\_geom\_hbond\_distance\_DH  
\_geom\_hbond\_distance\_HA  
\_geom\_hbond\_distance\_DA  
\_geom\_hbond\_angle\_DHA  
\_geom\_hbond\_publ\_flag  
? ? ? ? ? ? ? ? ? ?

#=====

# 11. STRUCTURE-FACTOR LIST

loop\_

\_refl\_index\_h  
\_refl\_index\_k  
\_refl\_index\_l  
\_refl\_F\_squared\_calc

\_refln\_F\_squared\_meas  
 \_refln\_F\_squared\_sigma  
 \_refln\_observed\_status

|    |   |   |          |          |         |   |
|----|---|---|----------|----------|---------|---|
| 1  | 0 | 0 | 18.03    | 11.45    | 11.45   | < |
| 3  | 0 | 0 | 77.60    | 54.37    | 14.31   | o |
| 4  | 0 | 0 | 6182.12  | 6321.08  | 309.04  | o |
| 6  | 0 | 0 | 496.77   | 460.70   | 37.20   | o |
| 7  | 0 | 0 | 11.50    | 100.15   | 22.89   | o |
| 8  | 0 | 0 | 3032.31  | 4023.29  | 217.48  | o |
| 9  | 0 | 0 | 369.50   | 440.67   | 34.34   | o |
| 10 | 0 | 0 | 9224.93  | 8693.27  | 357.69  | o |
| 11 | 0 | 0 | 13.40    | 14.31    | 17.17   | < |
| 12 | 0 | 0 | 16104.40 | 18854.50 | 755.44  | o |
| 13 | 0 | 0 | 41.47    | -5.72    | 243.23  | < |
| 14 | 0 | 0 | 1780.18  | 1233.31  | 280.43  | o |
| 1  | 1 | 0 | 540.31   | 483.60   | 17.17   | o |
| 2  | 1 | 0 | 24.69    | 20.03    | 8.58    | < |
| 3  | 1 | 0 | 154.01   | 163.11   | 11.45   | o |
| 4  | 1 | 0 | 1399.67  | 1322.02  | 45.78   | o |
| 6  | 1 | 0 | 258.38   | 383.44   | 22.89   | o |
| 7  | 1 | 0 | 11.55    | 0.00     | 11.45   | < |
| 8  | 1 | 0 | 942.87   | 947.16   | 54.37   | o |
| 9  | 1 | 0 | 6.15     | 14.31    | 8.58    | < |
| 10 | 1 | 0 | 174.29   | 163.11   | 22.89   | o |
| 11 | 1 | 0 | 0.22     | 5.72     | 11.45   | < |
| 12 | 1 | 0 | 740.97   | 1101.68  | 80.12   | o |
| 13 | 1 | 0 | 0.01     | 8.58     | 14.31   | < |
| 14 | 1 | 0 | 78.53    | 31.48    | 17.17   | < |
| 3  | 2 | 0 | 67.08    | -71.54   | 11.45   | < |
| 5  | 2 | 0 | 1.58     | 14.31    | 8.58    | < |
| 6  | 2 | 0 | 11324.40 | 11065.50 | 343.38  | o |
| 7  | 2 | 0 | 149.94   | 231.78   | 20.03   | o |
| 8  | 2 | 0 | 3288.53  | 3728.55  | 140.21  | o |
| 11 | 2 | 0 | 0.38     | 22.89    | 11.45   | < |
| 12 | 2 | 0 | 539.15   | 489.32   | 469.29  | < |
| 13 | 2 | 0 | 1.94     | 20.03    | 14.31   | < |
| 14 | 2 | 0 | 11.87    | 22.89    | 14.31   | < |
| 1  | 3 | 0 | 90.50    | 25.75    | 14.31   | < |
| 2  | 3 | 0 | 33.28    | 14.31    | 8.58    | < |
| 3  | 3 | 0 | 5.37     | -34.34   | 5.72    | < |
| 4  | 3 | 0 | 1372.37  | 1322.02  | 45.78   | o |
| 5  | 3 | 0 | 272.15   | 248.95   | 17.17   | o |
| 6  | 3 | 0 | 1.00     | 34.34    | 14.31   | < |
| 7  | 3 | 0 | 7.52     | -2.86    | 11.45   | < |
| 8  | 3 | 0 | 12.31    | 5.72     | 11.45   | < |
| 9  | 3 | 0 | 2.52     | 22.89    | 14.31   | < |
| 10 | 3 | 0 | 0.78     | 0.00     | 11.45   | < |
| 11 | 3 | 0 | 38.18    | 85.85    | 20.03   | o |
| 12 | 3 | 0 | 60.01    | 5.72     | 11.45   | < |
| 13 | 3 | 0 | 33.34    | 60.09    | 80.12   | < |
| 14 | 3 | 0 | 100.30   | 31.48    | 20.03   | < |
| 0  | 4 | 0 | 33819.80 | 25882.40 | 1233.31 | o |
| 2  | 4 | 0 | 15119.20 | 13632.20 | 434.95  | o |
| 3  | 4 | 0 | 57.93    | 5.72     | 8.58    | < |

## paulkerrite.cif

|    |   |   |           |           |         |   |
|----|---|---|-----------|-----------|---------|---|
| 5  | 4 | 0 | 243.71    | 257.54    | 20.03   | o |
| 6  | 4 | 0 | 117814.00 | 116166.00 | 3897.38 | o |
| 7  | 4 | 0 | 46.07     | 105.88    | 71.54   | < |
| 8  | 4 | 0 | 4849.66   | 5170.75   | 217.48  | o |
| 9  | 4 | 0 | 144.90    | 231.78    | 22.89   | o |
| 10 | 4 | 0 | 1016.08   | 1356.36   | 60.09   | o |
| 11 | 4 | 0 | 33.25     | 94.43     | 17.17   | o |
| 12 | 4 | 0 | 3060.44   | 2440.87   | 2254.87 | < |
| 13 | 4 | 0 | 2.92      | 8.58      | 11.45   | < |
| 14 | 4 | 0 | 987.06    | 68.68     | 329.07  | < |
| 1  | 5 | 0 | 513.13    | 686.76    | 37.20   | o |
| 2  | 5 | 0 | 82.11     | 40.06     | 14.31   | < |
| 3  | 5 | 0 | 401.60    | 460.70    | 25.75   | o |
| 4  | 5 | 0 | 11.27     | 14.31     | 8.58    | < |
| 5  | 5 | 0 | 73.15     | 34.34     | 14.31   | < |
| 6  | 5 | 0 | 1015.90   | 1124.57   | 48.65   | o |
| 7  | 5 | 0 | 37.59     | 74.40     | 14.31   | o |
| 8  | 5 | 0 | 280.34    | 349.10    | 31.48   | o |
| 9  | 5 | 0 | 1.01      | 0.00      | 11.45   | < |
| 11 | 5 | 0 | 8.74      | 8.58      | 14.31   | < |
| 12 | 5 | 0 | 88.45     | 40.06     | 14.31   | < |
| 13 | 5 | 0 | 8.82      | 8.58      | 17.17   | < |
| 14 | 5 | 0 | 32.00     | 0.00      | 14.31   | < |
| 1  | 6 | 0 | 79.21     | 40.06     | 11.45   | o |
| 2  | 6 | 0 | 137665.00 | 108403.00 | 4189.25 | o |
| 4  | 6 | 0 | 19584.10  | 19398.20  | 672.46  | o |
| 5  | 6 | 0 | 55.71     | 51.51     | 11.45   | o |
| 6  | 6 | 0 | 43971.70  | 35085.00  | 1985.89 | o |
| 7  | 6 | 0 | 81.59     | 268.98    | 68.68   | o |
| 8  | 6 | 0 | 1352.26   | 1487.99   | 77.26   | o |
| 9  | 6 | 0 | 5.99      | 60.09     | 20.03   | < |
| 11 | 6 | 0 | 51.16     | 105.88    | 20.03   | o |
| 12 | 6 | 0 | 23.26     | 2.86      | 14.31   | < |
| 13 | 6 | 0 | 15.71     | 28.62     | 103.01  | < |
| 14 | 6 | 0 | 2.81      | -5.72     | 14.31   | < |
| 1  | 7 | 0 | 22.40     | 42.92     | 11.45   | o |
| 3  | 7 | 0 | 32.47     | 82.98     | 14.31   | o |
| 4  | 7 | 0 | 13.28     | 45.78     | 17.17   | < |
| 5  | 7 | 0 | 0.22      | 2.86      | 8.58    | < |
| 6  | 7 | 0 | 41.78     | 51.51     | 17.17   | < |
| 7  | 7 | 0 | 1.42      | 0.00      | 22.89   | < |
| 8  | 7 | 0 | 21.60     | 31.48     | 14.31   | < |
| 9  | 7 | 0 | 0.32      | 2.86      | 14.31   | < |
| 10 | 7 | 0 | 782.93    | 472.15    | 117.32  | o |
| 11 | 7 | 0 | 0.51      | 0.00      | 20.03   | < |
| 12 | 7 | 0 | 331.77    | 283.29    | 85.85   | o |
| 13 | 7 | 0 | 2.92      | 0.00      | 14.31   | < |
| 14 | 7 | 0 | 78.74     | 17.17     | 17.17   | < |
| 0  | 8 | 0 | 21924.10  | 20265.20  | 975.78  | o |
| 1  | 8 | 0 | 43.85     | 74.40     | 14.31   | o |
| 3  | 8 | 0 | 0.02      | 17.17     | 11.45   | < |
| 4  | 8 | 0 | 3214.97   | 2970.25   | 111.60  | o |
| 5  | 8 | 0 | 21.41     | 25.75     | 20.03   | < |
| 6  | 8 | 0 | 30576.30  | 31711.30  | 1299.13 | o |

## paulkerrite.cif

|    |    |   |           |           |            |
|----|----|---|-----------|-----------|------------|
| 7  | 8  | 0 | 6.35      | 74.40     | 234.64 <   |
| 8  | 8  | 0 | 6266.53   | 7969.31   | 394.89 o   |
| 9  | 8  | 0 | 35.97     | 88.71     | 20.03 o    |
| 10 | 8  | 0 | 16.84     | 20.03     | 17.17 <    |
| 11 | 8  | 0 | 12.20     | 0.00      | 17.17 <    |
| 12 | 8  | 0 | 5824.32   | 4532.63   | 1591.00 <  |
| 13 | 8  | 0 | 16.22     | 31.48     | 20.03 <    |
| 14 | 8  | 0 | 611.70    | -28.62    | 28.62 <    |
| 1  | 9  | 0 | 176.50    | 163.11    | 20.03 o    |
| 2  | 9  | 0 | 1327.72   | 824.11    | 77.26 o    |
| 3  | 9  | 0 | 325.07    | 369.14    | 31.48 o    |
| 4  | 9  | 0 | 1586.77   | 1559.52   | 94.43 o    |
| 5  | 9  | 0 | 17.72     | 25.75     | 11.45 <    |
| 6  | 9  | 0 | 844.99    | 815.53    | 51.51 o    |
| 7  | 9  | 0 | 156.68    | 140.21    | 20.03 o    |
| 8  | 9  | 0 | 145.33    | 108.74    | 20.03 o    |
| 9  | 9  | 0 | 27.40     | 62.95     | 20.03 o    |
| 10 | 9  | 0 | 8.58      | 8.58      | 17.17 <    |
| 11 | 9  | 0 | 50.95     | 103.01    | 22.89 o    |
| 12 | 9  | 0 | 237.82    | 228.92    | 68.68 o    |
| 13 | 9  | 0 | 0.14      | 5.72      | 20.03 <    |
| 14 | 9  | 0 | 6.98      | 5.72      | 20.03 <    |
| 0  | 10 | 0 | 10173.00  | 9975.23   | 495.04 o   |
| 1  | 10 | 0 | 26.27     | 65.81     | 17.17 o    |
| 2  | 10 | 0 | 34.15     | 37.20     | 14.31 <    |
| 3  | 10 | 0 | 114.41    | 123.04    | 22.89 o    |
| 4  | 10 | 0 | 47829.70  | 42321.80  | 1430.76 o  |
| 5  | 10 | 0 | 3.94      | 22.89     | 8.58 <     |
| 6  | 10 | 0 | 10936.10  | 9188.31   | 406.33 o   |
| 7  | 10 | 0 | 253.00    | 237.51    | 25.75 o    |
| 8  | 10 | 0 | 563.57    | 738.27    | 62.95 o    |
| 9  | 10 | 0 | 10.98     | 131.63    | 31.48 o    |
| 11 | 10 | 0 | 62.91     | 60.09     | 25.75 <    |
| 12 | 10 | 0 | 2716.17   | 3279.29   | 203.17 o   |
| 13 | 10 | 0 | 13.06     | 0.00      | 17.17 <    |
| 14 | 10 | 0 | 1.89      | -2.86     | 22.89 <    |
| 1  | 11 | 0 | 121.64    | 117.32    | 20.03 o    |
| 2  | 11 | 0 | 142.19    | 71.54     | 17.17 o    |
| 3  | 11 | 0 | 14.43     | 17.17     | 11.45 <    |
| 4  | 11 | 0 | 42.77     | 48.65     | 14.31 o    |
| 5  | 11 | 0 | 0.33      | 2.86      | 11.45 <    |
| 6  | 11 | 0 | 524.63    | 360.55    | 28.62 o    |
| 7  | 11 | 0 | 0.54      | 2.86      | 11.45 <    |
| 8  | 11 | 0 | 1486.17   | 1905.77   | 114.46 o   |
| 9  | 11 | 0 | 14.15     | 17.17     | 17.17 <    |
| 10 | 11 | 0 | 113.68    | 140.21    | 28.62 o    |
| 11 | 11 | 0 | 7.89      | 17.17     | 17.17 <    |
| 12 | 11 | 0 | 14.57     | -2.86     | 17.17 <    |
| 13 | 11 | 0 | 0.08      | -5.72     | 20.03 <    |
| 14 | 11 | 0 | 7.47      | 0.00      | 22.89 <    |
| 0  | 12 | 0 | 287660.00 | 282749.00 | 13406.20 o |
| 1  | 12 | 0 | 0.31      | 17.17     | 14.31 <    |
| 2  | 12 | 0 | 29939.20  | 23390.00  | 1133.16 o  |
| 3  | 12 | 0 | 0.66      | 14.31     | 11.45 <    |



## paulkerrite.cif

|    |    |   |         |         |         |   |
|----|----|---|---------|---------|---------|---|
| 4  | 12 | 0 | 2040.94 | 1490.85 | 94.43   | o |
| 5  | 12 | 0 | 0.37    | 14.31   | 11.45   | < |
| 6  | 12 | 0 | 2935.84 | 2961.66 | 137.35  | o |
| 7  | 12 | 0 | 19.63   | 42.92   | 14.31   | < |
| 8  | 12 | 0 | 828.42  | 578.03  | 51.51   | o |
| 9  | 12 | 0 | 30.25   | 28.62   | 17.17   | < |
| 10 | 12 | 0 | 3948.76 | 1673.98 | 1954.41 | < |
| 11 | 12 | 0 | 0.39    | 8.58    | 17.17   | < |
| 13 | 12 | 0 | 1.10    | 8.58    | 20.03   | < |
| 1  | 13 | 0 | 73.37   | 57.23   | 14.31   | o |
| 2  | 13 | 0 | 343.69  | 134.49  | 28.62   | o |
| 3  | 13 | 0 | 176.80  | 143.08  | 40.06   | o |
| 4  | 13 | 0 | 13.02   | 2.86    | 11.45   | < |
| 5  | 13 | 0 | 18.87   | 14.31   | 11.45   | < |
| 6  | 13 | 0 | 219.61  | 137.35  | 17.17   | o |
| 7  | 13 | 0 | 0.57    | 5.72    | 14.31   | < |
| 8  | 13 | 0 | 192.30  | 180.27  | 31.48   | o |
| 9  | 13 | 0 | 0.25    | 0.00    | 14.31   | < |
| 10 | 13 | 0 | 588.76  | 529.38  | 65.81   | o |
| 11 | 13 | 0 | 0.26    | -11.45  | 20.03   | < |
| 12 | 13 | 0 | 365.01  | 97.29   | 589.47  | < |
| 13 | 13 | 0 | 0.82    | 5.72    | 17.17   | < |
| 14 | 13 | 0 | 11.99   | 11.45   | 34.34   | < |
| 1  | 14 | 0 | 8.74    | 5.72    | 11.45   | < |
| 3  | 14 | 0 | 19.26   | 40.06   | 11.45   | o |
| 4  | 14 | 0 | 1162.90 | 123.04  | 108.74  | < |
| 5  | 14 | 0 | 51.14   | 54.37   | 14.31   | o |
| 7  | 14 | 0 | 36.96   | 74.40   | 17.17   | o |
| 8  | 14 | 0 | 259.38  | 183.14  | 28.62   | o |
| 9  | 14 | 0 | 40.98   | 74.40   | 20.03   | o |
| 10 | 14 | 0 | 2380.24 | 2363.61 | 1130.30 | < |
| 11 | 14 | 0 | 58.19   | 65.81   | 34.34   | < |
| 12 | 14 | 0 | 90.58   | 40.06   | 22.89   | < |
| 13 | 14 | 0 | 15.33   | 20.03   | 25.75   | < |
| 1  | 15 | 0 | 23.84   | 17.17   | 14.31   | < |
| 2  | 15 | 0 | 2762.43 | 2066.01 | 128.77  | o |
| 3  | 15 | 0 | 12.55   | 11.45   | 14.31   | < |
| 4  | 15 | 0 | 28.35   | 17.17   | 14.31   | < |
| 5  | 15 | 0 | 126.12  | 94.43   | 22.89   | o |
| 6  | 15 | 0 | 6.75    | 8.58    | 11.45   | < |
| 7  | 15 | 0 | 11.15   | 14.31   | 11.45   | < |
| 8  | 15 | 0 | 0.15    | 5.72    | 11.45   | < |
| 9  | 15 | 0 | 0.94    | 8.58    | 17.17   | < |
| 10 | 15 | 0 | 5.81    | 2.86    | 17.17   | < |
| 11 | 15 | 0 | 0.38    | -2.86   | 28.62   | < |
| 12 | 15 | 0 | 8.50    | 0.00    | 17.17   | < |
| 13 | 15 | 0 | 11.44   | 57.23   | 45.78   | < |
| 1  | 16 | 0 | 0.35    | 5.72    | 14.31   | < |
| 3  | 16 | 0 | 8.05    | 2.86    | 14.31   | < |
| 5  | 16 | 0 | 16.44   | 20.03   | 11.45   | < |
| 7  | 16 | 0 | 2.21    | 17.17   | 11.45   | < |
| 9  | 16 | 0 | 34.72   | 28.62   | 17.17   | < |
| 10 | 16 | 0 | 606.96  | -62.95  | 1556.66 | < |
| 11 | 16 | 0 | 3.19    | -2.86   | 22.89   | < |

## paulkerrite.cif

|    |    |   |         |         |           |
|----|----|---|---------|---------|-----------|
| 12 | 16 | 0 | 446.36  | -2.86   | 105.88 <  |
| 1  | 17 | 0 | 2.36    | 2.86    | 14.31 <   |
| 3  | 17 | 0 | 4.01    | 8.58    | 17.17 <   |
| 4  | 17 | 0 | 9.90    | 2.86    | 14.31 <   |
| 5  | 17 | 0 | 8.02    | 11.45   | 11.45 <   |
| 6  | 17 | 0 | 185.90  | 25.75   | 20.03 <   |
| 7  | 17 | 0 | 2.80    | 2.86    | 11.45 <   |
| 8  | 17 | 0 | 82.98   | 60.09   | 20.03 <   |
| 9  | 17 | 0 | 3.71    | 5.72    | 17.17 <   |
| 10 | 17 | 0 | 119.11  | 51.51   | 20.03 <   |
| 11 | 17 | 0 | 7.64    | 5.72    | 20.03 <   |
| 12 | 17 | 0 | 15.48   | 11.45   | 22.89 <   |
| 0  | 18 | 0 | 5.35    | -2.86   | 25.75 <   |
| 1  | 18 | 0 | 21.83   | 0.00    | 17.17 <   |
| 3  | 18 | 0 | 26.73   | 14.31   | 17.17 <   |
| 5  | 18 | 0 | 36.89   | 37.20   | 14.31 <   |
| 6  | 18 | 0 | 3700.19 | 569.44  | 2003.06 < |
| 7  | 18 | 0 | 36.00   | 31.48   | 14.31 <   |
| 8  | 18 | 0 | 242.33  | 148.80  | 34.34 o   |
| 9  | 18 | 0 | 8.51    | 17.17   | 20.03 <   |
| 11 | 18 | 0 | 4.16    | 11.45   | 20.03 <   |
| 1  | 19 | 0 | 79.83   | 77.26   | 22.89 o   |
| 2  | 19 | 0 | 115.48  | 34.34   | 22.89 <   |
| 3  | 19 | 0 | 20.78   | 17.17   | 17.17 <   |
| 4  | 19 | 0 | 1.59    | 2.86    | 17.17 <   |
| 5  | 19 | 0 | 20.00   | 22.89   | 17.17 <   |
| 6  | 19 | 0 | 100.84  | 51.51   | 14.31 o   |
| 7  | 19 | 0 | 2.17    | 2.86    | 14.31 <   |
| 8  | 19 | 0 | 550.23  | 8.58    | 2043.12 < |
| 9  | 19 | 0 | 0.02    | 0.00    | 14.31 <   |
| 10 | 19 | 0 | 1.24    | 2.86    | 17.17 <   |
| 11 | 19 | 0 | 0.08    | -2.86   | 20.03 <   |
| 1  | 20 | 0 | 0.50    | 5.72    | 14.31 <   |
| 2  | 20 | 0 | 496.13  | 334.80  | 45.78 o   |
| 3  | 20 | 0 | 2.01    | 8.58    | 17.17 <   |
| 4  | 20 | 0 | 91.75   | 28.62   | 17.17 <   |
| 5  | 20 | 0 | 40.93   | 2.86    | 17.17 <   |
| 7  | 20 | 0 | 1.12    | 11.45   | 11.45 <   |
| 8  | 20 | 0 | 989.09  | 34.34   | 3210.62 < |
| 9  | 20 | 0 | 19.14   | 28.62   | 17.17 <   |
| 10 | 20 | 0 | 111.52  | 51.51   | 20.03 <   |
| 11 | 20 | 0 | 5.62    | 0.00    | 28.62 <   |
| 1  | 21 | 0 | 6.14    | 8.58    | 17.17 <   |
| 2  | 21 | 0 | 173.88  | 108.74  | 28.62 o   |
| 3  | 21 | 0 | 15.94   | 2.86    | 14.31 <   |
| 5  | 21 | 0 | 2.50    | 2.86    | 14.31 <   |
| 6  | 21 | 0 | 2.90    | -2.86   | 11.45 <   |
| 7  | 21 | 0 | 2.08    | 5.72    | 14.31 <   |
| 8  | 21 | 0 | 29.34   | 25.75   | 17.17 <   |
| 9  | 21 | 0 | 0.18    | 2.86    | 14.31 <   |
| 10 | 21 | 0 | 0.96    | 5.72    | 22.89 <   |
| 0  | 22 | 0 | 2119.93 | 2094.63 | 194.58 o  |
| 1  | 22 | 0 | 4.22    | 8.58    | 17.17 <   |
| 2  | 22 | 0 | 851.84  | 457.84  | 80.12 o   |

## paulkerrite.cif

|     |    |   |         |         |           |
|-----|----|---|---------|---------|-----------|
| 3   | 22 | 0 | 0.38    | 2.86    | 14.31 <   |
| 5   | 22 | 0 | 2.94    | 2.86    | 14.31 <   |
| 6   | 22 | 0 | 208.92  | 14.31   | 25.75 <   |
| 7   | 22 | 0 | 1.23    | 8.58    | 11.45 <   |
| 8   | 22 | 0 | 9.29    | 11.45   | 14.31 <   |
| 9   | 22 | 0 | 7.71    | 8.58    | 22.89 <   |
| 10  | 22 | 0 | 556.42  | -48.65  | 1794.17 < |
| 1   | 23 | 0 | 15.69   | 25.75   | 20.03 <   |
| 2   | 23 | 0 | 107.68  | 62.95   | 20.03 o   |
| 3   | 23 | 0 | 13.07   | 34.34   | 17.17 <   |
| 4   | 23 | 0 | 540.89  | 42.92   | 143.08 <  |
| 5   | 23 | 0 | 16.73   | 22.89   | 14.31 <   |
| 6   | 23 | 0 | 71.24   | 28.62   | 14.31 <   |
| 7   | 23 | 0 | 5.65    | 2.86    | 11.45 <   |
| 8   | 23 | 0 | 6.39    | 8.58    | 17.17 <   |
| 9   | 23 | 0 | 0.11    | -5.72   | 22.89 <   |
| 10  | 23 | 0 | 20.72   | -2.86   | 40.06 <   |
| 1   | 24 | 0 | 3.20    | 8.58    | 17.17 <   |
| 3   | 24 | 0 | 2.13    | 14.31   | 14.31 <   |
| 4   | 24 | 0 | 121.23  | 40.06   | 17.17 <   |
| 5   | 24 | 0 | 6.53    | 8.58    | 14.31 <   |
| 6   | 24 | 0 | 2786.57 | 1822.78 | 3880.21 < |
| 7   | 24 | 0 | 19.14   | 14.31   | 14.31 <   |
| 8   | 24 | 0 | 378.32  | -22.89  | 257.54 <  |
| 9   | 24 | 0 | 8.78    | 5.72    | 25.75 <   |
| 1   | 25 | 0 | 11.03   | 14.31   | 17.17 <   |
| 2   | 25 | 0 | 91.98   | 45.78   | 20.03 <   |
| 3   | 25 | 0 | 10.19   | 14.31   | 20.03 <   |
| 4   | 25 | 0 | 15.86   | 11.45   | 17.17 <   |
| 5   | 25 | 0 | 0.01    | 0.00    | 11.45 <   |
| 6   | 25 | 0 | 68.23   | 54.37   | 25.75 <   |
| 7   | 25 | 0 | 0.78    | -2.86   | 20.03 <   |
| 8   | 25 | 0 | 45.45   | 31.48   | 177.41 <  |
| 9   | 25 | 0 | 0.50    | -5.72   | 22.89 <   |
| 0   | 26 | 0 | 2.17    | 8.58    | 28.62 <   |
| 1   | 26 | 0 | 1.97    | -2.86   | 17.17 <   |
| 2   | 26 | 0 | 1522.72 | 1665.40 | 111.60 o  |
| 3   | 26 | 0 | 0.03    | 5.72    | 17.17 <   |
| 4   | 26 | 0 | 0.93    | 5.72    | 20.03 <   |
| 5   | 26 | 0 | 2.13    | 5.72    | 20.03 <   |
| 7   | 26 | 0 | 2.79    | -2.86   | 17.17 <   |
| 8   | 26 | 0 | 4.66    | 2.86    | 20.03 <   |
| 1   | 27 | 0 | 11.47   | 28.62   | 17.17 <   |
| 3   | 27 | 0 | 5.95    | 8.58    | 25.75 <   |
| 4   | 27 | 0 | 80.57   | 65.81   | 28.62 <   |
| 5   | 27 | 0 | 0.22    | -2.86   | 25.75 <   |
| 6   | 27 | 0 | 73.59   | -22.89  | 22.89 <   |
| -15 | 1  | 1 | 27.14   | 0.00    | 17.17 <   |
| -14 | 1  | 1 | 4.91    | 14.31   | 14.31 <   |
| -13 | 1  | 1 | 1285.63 | 1113.13 | 1055.90 < |
| -12 | 1  | 1 | 1317.42 | 1708.32 | 163.11 o  |
| -11 | 1  | 1 | 1399.84 | 1536.63 | 68.68 o   |
| -10 | 1  | 1 | 901.88  | 778.33  | 40.06 o   |
| -9  | 1  | 1 | 4980.00 | 4904.63 | 163.11 o  |

## paulkerrite.cif

|     |   |   |          |          |         |   |
|-----|---|---|----------|----------|---------|---|
| -8  | 1 | 1 | 63080.20 | 70690.80 | 2134.69 | o |
| -7  | 1 | 1 | 1101.17  | 964.33   | 48.65   | o |
| -5  | 1 | 1 | 2133.79  | 1897.18  | 74.40   | o |
| -4  | 1 | 1 | 41666.50 | 36741.80 | 1236.17 | o |
| -3  | 1 | 1 | 145.44   | 68.68    | 14.31   | o |
| -1  | 1 | 1 | 29260.30 | 23590.30 | 918.54  | o |
| 0   | 1 | 1 | 371.27   | 331.93   | 14.31   | o |
| 3   | 1 | 1 | 82.40    | 28.62    | 8.58    | o |
| 5   | 1 | 1 | 1323.27  | 1467.96  | 51.51   | o |
| 6   | 1 | 1 | 270.02   | 351.97   | 20.03   | o |
| 7   | 1 | 1 | 867.76   | 775.47   | 31.48   | o |
| 8   | 1 | 1 | 63471.60 | 64472.70 | 1940.10 | o |
| 9   | 1 | 1 | 5026.07  | 4275.10  | 143.08  | o |
| 10  | 1 | 1 | 762.27   | 658.15   | 37.20   | o |
| 11  | 1 | 1 | 1049.50  | 1113.13  | 48.65   | o |
| 12  | 1 | 1 | 1685.02  | 2094.63  | 88.71   | o |
| 13  | 1 | 1 | 1031.14  | 955.74   | 54.37   | o |
| 14  | 1 | 1 | 5.49     | 20.03    | 17.17   | < |
| -15 | 2 | 1 | 41.22    | 0.00     | 28.62   | < |
| -14 | 2 | 1 | 6.01     | -14.31   | 14.31   | < |
| -13 | 2 | 1 | 117.22   | 94.43    | 183.14  | < |
| -12 | 2 | 1 | 213.08   | 171.69   | 220.34  | < |
| -11 | 2 | 1 | 88.94    | 40.06    | 20.03   | < |
| -10 | 2 | 1 | 337.57   | 475.01   | 31.48   | o |
| -9  | 2 | 1 | 11.58    | 20.03    | 14.31   | < |
| -8  | 2 | 1 | 109.96   | 134.49   | 20.03   | o |
| -7  | 2 | 1 | 1092.38  | 1015.84  | 48.65   | o |
| -6  | 2 | 1 | 184.26   | 188.86   | 20.03   | o |
| -5  | 2 | 1 | 651.11   | 615.22   | 28.62   | o |
| -3  | 2 | 1 | 15.74    | -8.58    | 8.58    | < |
| -2  | 2 | 1 | 146.70   | 191.72   | 14.31   | o |
| -1  | 2 | 1 | 877.15   | 709.66   | 28.62   | o |
| 0   | 2 | 1 | 239.40   | 206.03   | 8.58    | o |
| 1   | 2 | 1 | 870.67   | 801.22   | 37.20   | o |
| 2   | 2 | 1 | 345.00   | 283.29   | 14.31   | o |
| 3   | 2 | 1 | 35.82    | -11.45   | 5.72    | < |
| 4   | 2 | 1 | 134.46   | 191.72   | 14.31   | o |
| 5   | 2 | 1 | 380.02   | 349.10   | 20.03   | o |
| 6   | 2 | 1 | 6.64     | 37.20    | 11.45   | o |
| 7   | 2 | 1 | 1207.49  | 1136.02  | 54.37   | o |
| 8   | 2 | 1 | 745.33   | 958.61   | 51.51   | o |
| 9   | 2 | 1 | 42.02    | 20.03    | 11.45   | < |
| 10  | 2 | 1 | 23.93    | 5.72     | 311.90  | < |
| 11  | 2 | 1 | 165.27   | 91.57    | 25.75   | o |
| 12  | 2 | 1 | 27.85    | 25.75    | 48.65   | < |
| 13  | 2 | 1 | 154.42   | 137.35   | 97.29   | < |
| 14  | 2 | 1 | 22.87    | -2.86    | 100.15  | < |
| -15 | 3 | 1 | 429.32   | 40.06    | 65.81   | < |
| -14 | 3 | 1 | 1361.67  | 1665.40  | 206.03  | o |
| -13 | 3 | 1 | 85.07    | 57.23    | 14.31   | o |
| -12 | 3 | 1 | 51.71    | 57.23    | 14.31   | o |
| -11 | 3 | 1 | 399.01   | 283.29   | 31.48   | o |
| -9  | 3 | 1 | 1.34     | 25.75    | 14.31   | < |
| -8  | 3 | 1 | 2227.97  | 2409.39  | 85.85   | o |

## paulkerrite.cif

|     |   |   |          |          |         |   |
|-----|---|---|----------|----------|---------|---|
| -7  | 3 | 1 | 10438.00 | 10006.70 | 314.77  | o |
| -6  | 3 | 1 | 4370.87  | 3757.16  | 137.35  | o |
| -5  | 3 | 1 | 46.57    | 5.72     | 11.45   | < |
| -4  | 3 | 1 | 1496.76  | 1459.37  | 51.51   | o |
| -3  | 3 | 1 | 7049.05  | 7056.49  | 217.48  | o |
| -2  | 3 | 1 | 33480.20 | 30337.70 | 844.15  | o |
| 0   | 3 | 1 | 267.89   | 314.77   | 17.17   | o |
| 1   | 3 | 1 | 7880.51  | 8315.55  | 283.29  | o |
| 5   | 3 | 1 | 20.92    | 20.03    | 11.45   | < |
| 6   | 3 | 1 | 1749.83  | 1797.03  | 68.68   | o |
| 7   | 3 | 1 | 9730.95  | 9231.24  | 317.63  | o |
| 8   | 3 | 1 | 1700.76  | 2043.12  | 151.66  | o |
| 9   | 3 | 1 | 2.15     | 5.72     | 11.45   | < |
| 10  | 3 | 1 | 2424.14  | 2523.85  | 105.88  | o |
| 12  | 3 | 1 | 179.61   | 157.38   | 2240.56 | < |
| 13  | 3 | 1 | 77.65    | 71.54    | 20.03   | o |
| 14  | 3 | 1 | 1055.44  | 286.15   | 211.75  | < |
| -15 | 4 | 1 | 5.26     | -5.72    | 25.75   | < |
| -14 | 4 | 1 | 16.48    | -22.89   | 489.32  | < |
| -13 | 4 | 1 | 0.60     | 5.72     | 14.31   | < |
| -12 | 4 | 1 | 118.23   | 123.04   | 48.65   | < |
| -11 | 4 | 1 | 41.61    | 25.75    | 191.72  | < |
| -10 | 4 | 1 | 4.13     | 5.72     | 14.31   | < |
| -9  | 4 | 1 | 172.98   | 145.94   | 20.03   | o |
| -8  | 4 | 1 | 501.86   | 629.53   | 34.34   | o |
| -7  | 4 | 1 | 102.03   | 88.71    | 17.17   | o |
| -6  | 4 | 1 | 279.92   | 317.63   | 22.89   | o |
| -5  | 4 | 1 | 350.64   | 369.14   | 25.75   | o |
| -4  | 4 | 1 | 110.92   | 91.57    | 11.45   | o |
| -3  | 4 | 1 | 1776.08  | 2066.01  | 65.81   | o |
| -2  | 4 | 1 | 12.26    | 28.62    | 8.58    | o |
| -1  | 4 | 1 | 160.94   | 151.66   | 11.45   | o |
| 0   | 4 | 1 | 54.11    | 34.34    | 11.45   | o |
| 1   | 4 | 1 | 74.85    | 103.01   | 11.45   | o |
| 2   | 4 | 1 | 38.65    | 48.65    | 8.58    | o |
| 4   | 4 | 1 | 169.10   | 120.18   | 14.31   | o |
| 5   | 4 | 1 | 779.02   | 629.53   | 28.62   | o |
| 6   | 4 | 1 | 587.19   | 646.70   | 34.34   | o |
| 7   | 4 | 1 | 22.22    | 20.03    | 11.45   | < |
| 8   | 4 | 1 | 210.56   | 177.41   | 25.75   | o |
| 9   | 4 | 1 | 56.85    | 40.06    | 17.17   | < |
| 10  | 4 | 1 | 56.38    | 25.75    | 14.31   | < |
| 11  | 4 | 1 | 48.36    | 28.62    | 11.45   | < |
| 12  | 4 | 1 | 47.49    | 25.75    | 14.31   | < |
| 13  | 4 | 1 | 27.80    | 5.72     | 14.31   | < |
| 14  | 4 | 1 | 15.62    | -20.03   | 103.01  | < |
| -15 | 5 | 1 | 290.21   | 31.48    | 31.48   | < |
| -14 | 5 | 1 | 2373.15  | 3064.68  | 580.89  | o |
| -13 | 5 | 1 | 18.34    | 22.89    | 14.31   | < |
| -11 | 5 | 1 | 100.86   | 74.40    | 17.17   | o |
| -10 | 5 | 1 | 5627.18  | 6982.09  | 248.95  | o |
| -9  | 5 | 1 | 695.17   | 512.21   | 203.17  | < |
| -8  | 5 | 1 | 22.34    | 71.54    | 14.31   | o |
| -7  | 5 | 1 | 6301.88  | 6178.00  | 257.54  | o |

## paulkerrite.cif

|     |   |   |           |           |         |   |
|-----|---|---|-----------|-----------|---------|---|
| -6  | 5 | 1 | 6841.43   | 5848.93   | 246.09  | o |
| -5  | 5 | 1 | 12144.60  | 11414.60  | 392.03  | o |
| -4  | 5 | 1 | 14741.90  | 16376.40  | 560.86  | o |
| -3  | 5 | 1 | 19999.10  | 17360.80  | 495.04  | o |
| -1  | 5 | 1 | 569.91    | 555.13    | 25.75   | o |
| 0   | 5 | 1 | 8.56      | 17.17     | 11.45   | < |
| 1   | 5 | 1 | 576.86    | 652.42    | 31.48   | o |
| 2   | 5 | 1 | 147084.00 | 134646.00 | 4532.63 | o |
| 3   | 5 | 1 | 17659.40  | 17669.80  | 706.79  | o |
| 4   | 5 | 1 | 11448.10  | 12464.70  | 429.23  | o |
| 5   | 5 | 1 | 10623.90  | 10461.70  | 429.23  | o |
| 6   | 5 | 1 | 4133.09   | 4830.23   | 237.51  | o |
| 7   | 5 | 1 | 6053.99   | 7059.35   | 346.24  | o |
| 8   | 5 | 1 | 52.95     | 171.69    | 34.34   | o |
| 9   | 5 | 1 | 852.64    | 804.09    | 51.51   | o |
| 10  | 5 | 1 | 4778.34   | 6487.05   | 329.07  | o |
| 11  | 5 | 1 | 75.66     | 105.88    | 17.17   | o |
| 12  | 5 | 1 | 312.55    | 217.48    | 992.95  | < |
| 13  | 5 | 1 | 10.40     | 8.58      | 11.45   | < |
| 14  | 5 | 1 | 2611.93   | 795.50    | 941.44  | < |
| -15 | 6 | 1 | 26.70     | -2.86     | 25.75   | < |
| -14 | 6 | 1 | 8.53      | -14.31    | 14.31   | < |
| -13 | 6 | 1 | 54.58     | 25.75     | 14.31   | < |
| -12 | 6 | 1 | 23.21     | 17.17     | 14.31   | < |
| -11 | 6 | 1 | 70.19     | 54.37     | 20.03   | < |
| -10 | 6 | 1 | 421.29    | 629.53    | 42.92   | o |
| -9  | 6 | 1 | 23.65     | 25.75     | 17.17   | < |
| -8  | 6 | 1 | 281.56    | 263.26    | 60.09   | o |
| -7  | 6 | 1 | 81.99     | 57.23     | 17.17   | o |
| -6  | 6 | 1 | 17.04     | 48.65     | 11.45   | o |
| -5  | 6 | 1 | 109.85    | 74.40     | 14.31   | o |
| -4  | 6 | 1 | 376.10    | 489.32    | 31.48   | o |
| -2  | 6 | 1 | 218.73    | 211.75    | 20.03   | o |
| 0   | 6 | 1 | 450.87    | 475.01    | 31.48   | o |
| 1   | 6 | 1 | 213.25    | 163.11    | 14.31   | o |
| 2   | 6 | 1 | 247.64    | 323.35    | 22.89   | o |
| 3   | 6 | 1 | 122.10    | 100.15    | 14.31   | o |
| 5   | 6 | 1 | 43.18     | 28.62     | 11.45   | < |
| 6   | 6 | 1 | 77.13     | 94.43     | 14.31   | o |
| 7   | 6 | 1 | 143.57    | 85.85     | 17.17   | o |
| 8   | 6 | 1 | 4.98      | 51.51     | 14.31   | o |
| 9   | 6 | 1 | 103.64    | 62.95     | 42.92   | < |
| 10  | 6 | 1 | 104.50    | 108.74    | 17.17   | o |
| 11  | 6 | 1 | 151.26    | 134.49    | 20.03   | o |
| 12  | 6 | 1 | 1.74      | 2.86      | 14.31   | < |
| 13  | 6 | 1 | 58.83     | 25.75     | 14.31   | < |
| 14  | 6 | 1 | 8.51      | -2.86     | 22.89   | < |
| -15 | 7 | 1 | 110.33    | -8.58     | 25.75   | < |
| -14 | 7 | 1 | 900.29    | 140.21    | 540.83  | < |
| -13 | 7 | 1 | 191.60    | 77.26     | 22.89   | o |
| -12 | 7 | 1 | 700.86    | 929.99    | 54.37   | o |
| -11 | 7 | 1 | 893.27    | 858.45    | 254.68  | o |
| -9  | 7 | 1 | 2239.45   | 2366.47   | 97.29   | o |
| -8  | 7 | 1 | 3128.58   | 2595.39   | 103.01  | o |

## paulkerrite.cif

|     |   |   |          |          |         |   |
|-----|---|---|----------|----------|---------|---|
| -7  | 7 | 1 | 2548.62  | 2357.89  | 94.43   | o |
| -5  | 7 | 1 | 16702.10 | 20889.00 | 1001.53 | o |
| -4  | 7 | 1 | 23242.80 | 19793.10 | 609.50  | o |
| -3  | 7 | 1 | 1667.91  | 1296.26  | 54.37   | o |
| -1  | 7 | 1 | 2916.01  | 2735.60  | 120.18  | o |
| 0   | 7 | 1 | 537.41   | 646.70   | 40.06   | o |
| 1   | 7 | 1 | 4881.92  | 4684.29  | 165.97  | o |
| 2   | 7 | 1 | 43921.90 | 40836.60 | 1376.39 | o |
| 3   | 7 | 1 | 1152.30  | 1138.88  | 48.65   | o |
| 4   | 7 | 1 | 14379.60 | 15807.00 | 761.16  | o |
| 5   | 7 | 1 | 17880.70 | 16811.40 | 669.59  | o |
| 6   | 7 | 1 | 134.93   | 108.74   | 20.03   | o |
| 7   | 7 | 1 | 1348.17  | 1402.14  | 91.57   | o |
| 8   | 7 | 1 | 2114.19  | 2289.21  | 125.91  | o |
| 9   | 7 | 1 | 2784.24  | 3330.80  | 254.68  | o |
| 10  | 7 | 1 | 3056.07  | 4335.19  | 228.92  | o |
| 11  | 7 | 1 | 696.75   | 784.05   | 51.51   | o |
| 12  | 7 | 1 | 548.11   | -51.51   | 1322.02 | < |
| 13  | 7 | 1 | 136.33   | 74.40    | 17.17   | o |
| -15 | 8 | 1 | 43.78    | 8.58     | 28.62   | < |
| -14 | 8 | 1 | 115.36   | 28.62    | 17.17   | < |
| -13 | 8 | 1 | 42.15    | 20.03    | 20.03   | < |
| -12 | 8 | 1 | 13.29    | 22.89    | 25.75   | < |
| -11 | 8 | 1 | 22.06    | 5.72     | 54.37   | < |
| -10 | 8 | 1 | 0.13     | 11.45    | 14.31   | < |
| -9  | 8 | 1 | 240.85   | 171.69   | 22.89   | o |
| -8  | 8 | 1 | 240.35   | 211.75   | 34.34   | o |
| -7  | 8 | 1 | 295.82   | 283.29   | 62.95   | o |
| -6  | 8 | 1 | 339.37   | 409.20   | 31.48   | o |
| -5  | 8 | 1 | 218.06   | 140.21   | 17.17   | o |
| -4  | 8 | 1 | 2.45     | 40.06    | 20.03   | < |
| -3  | 8 | 1 | 294.14   | 260.40   | 22.89   | o |
| -2  | 8 | 1 | 179.96   | 8.58     | 28.62   | < |
| -1  | 8 | 1 | 862.11   | 975.78   | 65.81   | o |
| 0   | 8 | 1 | 48.44    | 42.92    | 11.45   | o |
| 3   | 8 | 1 | 271.15   | 140.21   | 28.62   | o |
| 4   | 8 | 1 | 85.31    | 103.01   | 17.17   | o |
| 5   | 8 | 1 | 210.39   | 151.66   | 20.03   | o |
| 7   | 8 | 1 | 97.61    | 145.94   | 20.03   | o |
| 8   | 8 | 1 | 46.15    | 62.95    | 17.17   | o |
| 9   | 8 | 1 | 294.39   | 211.75   | 34.34   | o |
| 10  | 8 | 1 | 85.21    | 82.98    | 20.03   | o |
| 11  | 8 | 1 | 63.59    | 45.78    | 17.17   | < |
| 12  | 8 | 1 | 151.24   | 194.58   | 34.34   | o |
| 13  | 8 | 1 | 109.22   | 31.48    | 14.31   | < |
| 14  | 8 | 1 | 73.98    | 17.17    | 25.75   | < |
| -15 | 9 | 1 | 192.77   | -71.54   | 40.06   | < |
| -14 | 9 | 1 | 96.80    | 31.48    | 394.89  | < |
| -13 | 9 | 1 | 57.22    | 25.75    | 20.03   | < |
| -12 | 9 | 1 | 352.24   | 211.75   | 200.31  | < |
| -11 | 9 | 1 | 72.80    | 51.51    | 17.17   | < |
| -10 | 9 | 1 | 482.07   | 695.35   | 91.57   | o |
| -9  | 9 | 1 | 302.48   | 286.15   | 31.48   | o |
| -7  | 9 | 1 | 4629.43  | 5757.36  | 289.01  | o |

## paulkerrite.cif

|     |    |   |          |          |         |   |
|-----|----|---|----------|----------|---------|---|
| -6  | 9  | 1 | 1074.62  | 1253.34  | 77.26   | o |
| -4  | 9  | 1 | 19148.30 | 18047.60 | 623.81  | o |
| -1  | 9  | 1 | 15.63    | 31.48    | 14.31   | < |
| 1   | 9  | 1 | 55.78    | 91.57    | 17.17   | o |
| 4   | 9  | 1 | 21126.30 | 16319.20 | 798.36  | o |
| 5   | 9  | 1 | 1834.95  | 1453.65  | 74.40   | o |
| 6   | 9  | 1 | 498.55   | 492.18   | 45.78   | o |
| 7   | 9  | 1 | 4807.21  | 3880.21  | 151.66  | o |
| 9   | 9  | 1 | 393.08   | 151.66   | 354.83  | < |
| 10  | 9  | 1 | 534.35   | 529.38   | 45.78   | o |
| 11  | 9  | 1 | 47.16    | 22.89    | 17.17   | < |
| 12  | 9  | 1 | 392.16   | 206.03   | 45.78   | o |
| 13  | 9  | 1 | 34.95    | 5.72     | 14.31   | < |
| 14  | 9  | 1 | 78.18    | 0.00     | 25.75   | < |
| -14 | 10 | 1 | 0.11     | -11.45   | 22.89   | < |
| -13 | 10 | 1 | 8.90     | 5.72     | 20.03   | < |
| -12 | 10 | 1 | 13.16    | 5.72     | 17.17   | < |
| -11 | 10 | 1 | 60.81    | 54.37    | 20.03   | < |
| -10 | 10 | 1 | 110.58   | 137.35   | 25.75   | o |
| -9  | 10 | 1 | 0.02     | 2.86     | 14.31   | < |
| -8  | 10 | 1 | 542.84   | 477.87   | 145.94  | o |
| -7  | 10 | 1 | 51.19    | 31.48    | 14.31   | < |
| -6  | 10 | 1 | 7.58     | 14.31    | 11.45   | < |
| -5  | 10 | 1 | 322.79   | 366.27   | 34.34   | o |
| -4  | 10 | 1 | 1824.16  | 2074.60  | 97.29   | o |
| -3  | 10 | 1 | 29.96    | 28.62    | 11.45   | < |
| -1  | 10 | 1 | 129.25   | 114.46   | 17.17   | o |
| 0   | 10 | 1 | 51.29    | 31.48    | 14.31   | < |
| 1   | 10 | 1 | 144.88   | 168.83   | 25.75   | o |
| 2   | 10 | 1 | 565.05   | 397.75   | 31.48   | o |
| 3   | 10 | 1 | 181.54   | 37.20    | 17.17   | < |
| 4   | 10 | 1 | 1395.17  | 1176.08  | 62.95   | o |
| 5   | 10 | 1 | 335.40   | 343.38   | 28.62   | o |
| 6   | 10 | 1 | 4.85     | 2.86     | 11.45   | < |
| 7   | 10 | 1 | 1.85     | 14.31    | 14.31   | < |
| 8   | 10 | 1 | 577.94   | 692.49   | 57.23   | o |
| 9   | 10 | 1 | 3.16     | 5.72     | 17.17   | < |
| 10  | 10 | 1 | 217.28   | 217.48   | 31.48   | o |
| 11  | 10 | 1 | 84.43    | 65.81    | 20.03   | o |
| 12  | 10 | 1 | 26.88    | 34.34    | 20.03   | < |
| 13  | 10 | 1 | 7.29     | 0.00     | 14.31   | < |
| 14  | 10 | 1 | 3.36     | 5.72     | 20.03   | < |
| -14 | 11 | 1 | 26.74    | 2.86     | 22.89   | < |
| -13 | 11 | 1 | 131.28   | 28.62    | 20.03   | < |
| -12 | 11 | 1 | 1473.76  | 1994.47  | 137.35  | o |
| -11 | 11 | 1 | 1952.50  | 1190.39  | 309.04  | o |
| -10 | 11 | 1 | 18.61    | 40.06    | 20.03   | < |
| -9  | 11 | 1 | 486.14   | 186.00   | 40.06   | o |
| -8  | 11 | 1 | 26097.90 | 31994.60 | 1259.07 | o |
| -7  | 11 | 1 | 356.11   | 360.55   | 42.92   | o |
| -6  | 11 | 1 | 529.93   | 446.40   | 34.34   | o |
| -4  | 11 | 1 | 27889.00 | 26228.60 | 1033.01 | o |
| -3  | 11 | 1 | 2602.90  | 2930.19  | 131.63  | o |
| 0   | 11 | 1 | 8.53     | 40.06    | 14.31   | < |



## paulkerrite.cif

|     |    |   |          |          |         |   |
|-----|----|---|----------|----------|---------|---|
| 5   | 11 | 1 | 2137.24  | 1702.60  | 103.01  | o |
| 6   | 11 | 1 | 411.45   | 268.98   | 31.48   | o |
| 8   | 11 | 1 | 23976.50 | 23298.40 | 964.33  | o |
| 9   | 11 | 1 | 453.42   | 357.69   | 57.23   | o |
| 10  | 11 | 1 | 15.55    | 20.03    | 17.17   | < |
| 11  | 11 | 1 | 1552.95  | 1061.62  | 1490.85 | < |
| 12  | 11 | 1 | 1344.54  | 878.48   | 200.31  | o |
| 13  | 11 | 1 | 153.43   | 123.04   | 31.48   | o |
| 14  | 11 | 1 | 97.26    | 20.03    | 22.89   | < |
| -14 | 12 | 1 | 18.43    | 8.58     | 31.48   | < |
| -13 | 12 | 1 | 30.17    | 2.86     | 17.17   | < |
| -12 | 12 | 1 | 157.20   | 31.48    | 25.75   | < |
| -11 | 12 | 1 | 81.91    | 42.92    | 25.75   | < |
| -10 | 12 | 1 | 0.06     | 17.17    | 20.03   | < |
| -9  | 12 | 1 | 107.79   | 91.57    | 20.03   | o |
| -8  | 12 | 1 | 165.99   | 143.08   | 31.48   | o |
| -7  | 12 | 1 | 63.15    | 48.65    | 17.17   | < |
| -5  | 12 | 1 | 7.08     | 5.72     | 11.45   | < |
| -4  | 12 | 1 | 163.73   | 217.48   | 22.89   | o |
| -3  | 12 | 1 | 437.67   | 389.17   | 37.20   | o |
| -2  | 12 | 1 | 655.43   | 635.26   | 51.51   | o |
| -1  | 12 | 1 | 155.81   | 80.12    | 17.17   | o |
| 1   | 12 | 1 | 26.75    | 65.81    | 22.89   | < |
| 2   | 12 | 1 | 590.33   | 383.44   | 34.34   | o |
| 3   | 12 | 1 | 357.28   | 414.92   | 40.06   | o |
| 4   | 12 | 1 | 371.31   | 246.09   | 31.48   | o |
| 5   | 12 | 1 | 18.57    | 2.86     | 11.45   | < |
| 6   | 12 | 1 | 214.58   | 251.81   | 34.34   | o |
| 7   | 12 | 1 | 3.80     | 22.89    | 11.45   | < |
| 9   | 12 | 1 | 208.49   | 80.12    | 25.75   | o |
| 10  | 12 | 1 | 86.77    | 114.46   | 28.62   | o |
| 11  | 12 | 1 | 120.53   | 114.46   | 28.62   | o |
| 12  | 12 | 1 | 7.33     | 48.65    | 22.89   | < |
| 13  | 12 | 1 | 70.45    | 8.58     | 25.75   | < |
| 14  | 12 | 1 | 10.45    | -2.86    | 22.89   | < |
| -13 | 13 | 1 | 565.09   | -40.06   | 892.79  | < |
| -12 | 13 | 1 | 27.99    | 22.89    | 20.03   | < |
| -11 | 13 | 1 | 54.81    | 22.89    | 20.03   | < |
| -10 | 13 | 1 | 29.01    | 22.89    | 17.17   | < |
| -9  | 13 | 1 | 1521.22  | 729.68   | 2100.35 | < |
| -8  | 13 | 1 | 8949.33  | 10315.70 | 515.07  | o |
| -7  | 13 | 1 | 103.36   | 54.37    | 17.17   | o |
| -6  | 13 | 1 | 201.34   | 85.85    | 17.17   | o |
| -5  | 13 | 1 | 303.59   | 280.43   | 25.75   | o |
| -3  | 13 | 1 | 5.36     | 31.48    | 11.45   | < |
| -2  | 13 | 1 | 279.71   | 180.27   | 28.62   | o |
| -1  | 13 | 1 | 5788.31  | 646.70   | 1233.31 | < |
| 0   | 13 | 1 | 141.16   | 108.74   | 20.03   | o |
| 3   | 13 | 1 | 1.47     | 8.58     | 11.45   | < |
| 5   | 13 | 1 | 491.98   | 51.51    | 543.69  | < |
| 6   | 13 | 1 | 102.53   | 100.15   | 17.17   | o |
| 7   | 13 | 1 | 39.88    | 57.23    | 14.31   | o |
| 9   | 13 | 1 | 1872.44  | 1319.16  | 137.35  | o |
| 10  | 13 | 1 | 12.82    | 28.62    | 17.17   | < |

## paulkerrite.cif

|     |    |   |         |         |           |
|-----|----|---|---------|---------|-----------|
| 11  | 13 | 1 | 40.69   | 5.72    | 60.09 <   |
| 12  | 13 | 1 | 51.16   | 22.89   | 20.03 <   |
| 14  | 13 | 1 | 203.85  | 74.40   | 34.34 <   |
| -13 | 14 | 1 | 15.94   | -5.72   | 17.17 <   |
| -12 | 14 | 1 | 92.38   | 25.75   | 20.03 <   |
| -11 | 14 | 1 | 10.70   | 0.00    | 20.03 <   |
| -10 | 14 | 1 | 58.40   | 57.23   | 22.89 <   |
| -9  | 14 | 1 | 142.00  | 143.08  | 31.48 o   |
| -8  | 14 | 1 | 58.39   | 34.34   | 17.17 <   |
| -7  | 14 | 1 | 25.42   | 25.75   | 20.03 <   |
| -6  | 14 | 1 | 201.76  | 131.63  | 22.89 o   |
| -5  | 14 | 1 | 54.06   | 57.23   | 14.31 o   |
| -4  | 14 | 1 | 30.80   | 31.48   | 11.45 <   |
| -3  | 14 | 1 | 57.67   | 31.48   | 14.31 <   |
| -1  | 14 | 1 | 180.82  | 80.12   | 17.17 o   |
| 0   | 14 | 1 | 94.73   | 60.09   | 14.31 o   |
| 1   | 14 | 1 | 187.62  | 123.04  | 20.03 o   |
| 3   | 14 | 1 | 62.79   | 31.48   | 14.31 <   |
| 4   | 14 | 1 | 1.25    | 17.17   | 11.45 <   |
| 5   | 14 | 1 | 70.69   | 25.75   | 14.31 <   |
| 7   | 14 | 1 | 18.07   | 8.58    | 11.45 <   |
| 8   | 14 | 1 | 28.16   | 8.58    | 14.31 <   |
| 9   | 14 | 1 | 33.23   | 42.92   | 17.17 <   |
| 10  | 14 | 1 | 53.00   | 77.26   | 25.75 o   |
| 11  | 14 | 1 | 38.90   | 14.31   | 17.17 <   |
| 12  | 14 | 1 | 85.90   | 25.75   | 20.03 <   |
| 13  | 14 | 1 | 5.02    | -8.58   | 28.62 <   |
| -12 | 15 | 1 | 13.64   | 8.58    | 20.03 <   |
| -11 | 15 | 1 | 7.54    | 14.31   | 17.17 <   |
| -10 | 15 | 1 | 1390.45 | 1774.14 | 103.01 o  |
| -9  | 15 | 1 | 557.25  | 105.88  | 452.12 <  |
| -8  | 15 | 1 | 677.33  | 772.61  | 68.68 o   |
| -7  | 15 | 1 | 190.53  | 105.88  | 22.89 o   |
| -6  | 15 | 1 | 2173.36 | 1676.85 | 105.88 o  |
| 0   | 15 | 1 | 82.66   | 34.34   | 14.31 <   |
| 7   | 15 | 1 | 133.19  | 31.48   | 17.17 <   |
| 8   | 15 | 1 | 1001.72 | -74.40  | 7299.72 < |
| 9   | 15 | 1 | 528.75  | 160.24  | 337.66 <  |
| 10  | 15 | 1 | 913.64  | 14.31   | 1885.74 < |
| 11  | 15 | 1 | 27.87   | 2.86    | 20.03 <   |
| 12  | 15 | 1 | 29.98   | 5.72    | 25.75 <   |
| 13  | 15 | 1 | 236.36  | 57.23   | 31.48 <   |
| -12 | 16 | 1 | 15.88   | 0.00    | 17.17 <   |
| -11 | 16 | 1 | 4.67    | -2.86   | 17.17 <   |
| -10 | 16 | 1 | 0.09    | 11.45   | 20.03 <   |
| -9  | 16 | 1 | 79.01   | 100.15  | 22.89 o   |
| -8  | 16 | 1 | 19.83   | 62.95   | 20.03 o   |
| -7  | 16 | 1 | 16.72   | 11.45   | 11.45 <   |
| -6  | 16 | 1 | 1687.71 | 1153.19 | 91.57 o   |
| -5  | 16 | 1 | 80.83   | 37.20   | 14.31 <   |
| -3  | 16 | 1 | 94.81   | 37.20   | 14.31 <   |
| -2  | 16 | 1 | 0.71    | 54.37   | 17.17 o   |
| -1  | 16 | 1 | 133.97  | 74.40   | 20.03 o   |
| 2   | 16 | 1 | 140.85  | 71.54   | 20.03 o   |

## paulkerrite.cif

|     |    |   |         |         |           |
|-----|----|---|---------|---------|-----------|
| 3   | 16 | 1 | 63.34   | 25.75   | 17.17 <   |
| 5   | 16 | 1 | 31.99   | 37.20   | 14.31 <   |
| 7   | 16 | 1 | 5.90    | 14.31   | 11.45 <   |
| 8   | 16 | 1 | 168.30  | 17.17   | 598.06 <  |
| 9   | 16 | 1 | 188.92  | -31.48  | 2117.52 < |
| 10  | 16 | 1 | 25.12   | 34.34   | 20.03 <   |
| 11  | 16 | 1 | 26.93   | 14.31   | 25.75 <   |
| 12  | 16 | 1 | 6.53    | 5.72    | 22.89 <   |
| -12 | 17 | 1 | 4.78    | -8.58   | 25.75 <   |
| -11 | 17 | 1 | 116.36  | 28.62   | 20.03 <   |
| -10 | 17 | 1 | 1164.79 | -54.37  | 2578.22 < |
| -9  | 17 | 1 | 12.32   | 5.72    | 14.31 <   |
| -5  | 17 | 1 | 248.30  | 28.62   | 20.03 <   |
| -4  | 17 | 1 | 34.59   | 14.31   | 17.17 <   |
| -2  | 17 | 1 | 7362.37 | 4864.57 | 372.00 o  |
| 0   | 17 | 1 | 132.46  | 97.29   | 20.03 o   |
| 1   | 17 | 1 | 404.99  | 334.80  | 34.34 o   |
| 3   | 17 | 1 | 2461.93 | 426.36  | 515.07 <  |
| 4   | 17 | 1 | 9.53    | 25.75   | 17.17 <   |
| 5   | 17 | 1 | 63.11   | 45.78   | 20.03 <   |
| 7   | 17 | 1 | 2522.25 | 1201.83 | 821.25 <  |
| 8   | 17 | 1 | 1477.76 | 137.35  | 1997.34 < |
| 9   | 17 | 1 | 28.27   | 5.72    | 14.31 <   |
| 10  | 17 | 1 | 943.35  | 266.12  | 1364.94 < |
| 11  | 17 | 1 | 127.83  | 37.20   | 20.03 <   |
| 12  | 17 | 1 | 0.48    | 17.17   | 28.62 <   |
| -12 | 18 | 1 | 6.64    | -8.58   | 48.65 <   |
| -11 | 18 | 1 | 17.26   | 5.72    | 17.17 <   |
| -10 | 18 | 1 | 199.21  | 177.41  | 51.51 o   |
| -9  | 18 | 1 | 13.29   | 5.72    | 17.17 <   |
| -8  | 18 | 1 | 1.20    | 11.45   | 14.31 <   |
| -7  | 18 | 1 | 4.00    | -2.86   | 11.45 <   |
| -6  | 18 | 1 | 0.01    | 17.17   | 14.31 <   |
| -5  | 18 | 1 | 331.44  | 45.78   | 34.34 <   |
| -4  | 18 | 1 | 183.64  | 194.58  | 34.34 o   |
| -3  | 18 | 1 | 25.72   | 5.72    | 14.31 <   |
| -2  | 18 | 1 | 257.26  | 37.20   | 22.89 <   |
| -1  | 18 | 1 | 150.00  | 17.17   | 28.62 <   |
| 0   | 18 | 1 | 99.24   | 51.51   | 22.89 <   |
| 1   | 18 | 1 | 204.81  | 74.40   | 17.17 o   |
| 2   | 18 | 1 | 324.90  | 143.08  | 25.75 o   |
| 3   | 18 | 1 | 2.94    | 17.17   | 17.17 <   |
| 4   | 18 | 1 | 276.48  | 163.11  | 37.20 o   |
| 5   | 18 | 1 | 220.04  | 140.21  | 34.34 o   |
| 6   | 18 | 1 | 12.32   | 5.72    | 14.31 <   |
| 7   | 18 | 1 | 18.42   | 0.00    | 11.45 <   |
| 8   | 18 | 1 | 83.74   | 20.03   | 131.63 <  |
| 9   | 18 | 1 | 26.57   | 14.31   | 17.17 <   |
| 10  | 18 | 1 | 59.76   | 128.77  | 28.62 o   |
| 11  | 18 | 1 | 21.31   | 2.86    | 17.17 <   |
| -11 | 19 | 1 | 46.66   | -17.17  | 45.78 <   |
| -10 | 19 | 1 | 337.54  | -40.06  | 22.89 <   |
| -9  | 19 | 1 | 276.84  | 120.18  | 517.93 <  |
| -8  | 19 | 1 | 552.59  | -60.09  | 7253.93 < |

## paulkerrite.cif

|     |    |   |         |         |         |   |
|-----|----|---|---------|---------|---------|---|
| -7  | 19 | 1 | 346.41  | 134.49  | 31.48   | o |
| -6  | 19 | 1 | 6.97    | 37.20   | 14.31   | < |
| -5  | 19 | 1 | 137.20  | 120.18  | 25.75   | o |
| -4  | 19 | 1 | 3065.09 | 1805.61 | 300.46  | o |
| -3  | 19 | 1 | 245.15  | 60.09   | 40.06   | < |
| -1  | 19 | 1 | 1432.36 | 752.58  | 100.15  | o |
| 0   | 19 | 1 | 10.47   | -2.86   | 28.62   | < |
| 2   | 19 | 1 | 692.73  | -17.17  | 366.27  | < |
| 3   | 19 | 1 | 242.68  | 54.37   | 25.75   | < |
| 5   | 19 | 1 | 172.60  | 57.23   | 22.89   | < |
| 6   | 19 | 1 | 59.25   | 25.75   | 120.18  | < |
| 7   | 19 | 1 | 246.06  | 254.68  | 45.78   | o |
| 8   | 19 | 1 | 651.88  | -17.17  | 1213.28 | < |
| 9   | 19 | 1 | 301.75  | 103.01  | 515.07  | < |
| 11  | 19 | 1 | 39.11   | 8.58    | 22.89   | < |
| -11 | 20 | 1 | 17.99   | -2.86   | 22.89   | < |
| -10 | 20 | 1 | 18.50   | 20.03   | 20.03   | < |
| -9  | 20 | 1 | 4.92    | 5.72    | 17.17   | < |
| -8  | 20 | 1 | 77.53   | 40.06   | 20.03   | < |
| -7  | 20 | 1 | 45.14   | 8.58    | 17.17   | < |
| -6  | 20 | 1 | 91.12   | 82.98   | 22.89   | o |
| -5  | 20 | 1 | 6.88    | 14.31   | 11.45   | < |
| -4  | 20 | 1 | 25.83   | 8.58    | 17.17   | < |
| -3  | 20 | 1 | 20.47   | 5.72    | 17.17   | < |
| -2  | 20 | 1 | 112.26  | 45.78   | 17.17   | < |
| -1  | 20 | 1 | 0.08    | 5.72    | 14.31   | < |
| 1   | 20 | 1 | 0.85    | 2.86    | 17.17   | < |
| 2   | 20 | 1 | 102.21  | 68.68   | 25.75   | < |
| 3   | 20 | 1 | 0.08    | 5.72    | 14.31   | < |
| 4   | 20 | 1 | 34.91   | 20.03   | 20.03   | < |
| 5   | 20 | 1 | 14.21   | 8.58    | 14.31   | < |
| 6   | 20 | 1 | 136.49  | 111.60  | 28.62   | o |
| 7   | 20 | 1 | 39.21   | 22.89   | 14.31   | < |
| 8   | 20 | 1 | 0.24    | 34.34   | 17.17   | < |
| 9   | 20 | 1 | 1.66    | 11.45   | 14.31   | < |
| 10  | 20 | 1 | 0.15    | 2.86    | 17.17   | < |
| -11 | 21 | 1 | 1.20    | 5.72    | 22.89   | < |
| -10 | 21 | 1 | 8.82    | 0.00    | 22.89   | < |
| -8  | 21 | 1 | 1120.80 | -22.89  | 1788.44 | < |
| -7  | 21 | 1 | 56.09   | 25.75   | 17.17   | < |
| -6  | 21 | 1 | 50.26   | 100.15  | 28.62   | o |
| -3  | 21 | 1 | 203.28  | 37.20   | 20.03   | < |
| -1  | 21 | 1 | 37.54   | 17.17   | 14.31   | < |
| 0   | 21 | 1 | 26.69   | 20.03   | 17.17   | < |
| 1   | 21 | 1 | 118.03  | 37.20   | 22.89   | < |
| 3   | 21 | 1 | 66.62   | 37.20   | 20.03   | < |
| 6   | 21 | 1 | 117.81  | 48.65   | 20.03   | < |
| 7   | 21 | 1 | 43.63   | 28.62   | 14.31   | < |
| 8   | 21 | 1 | 1225.15 | 28.62   | 1911.49 | < |
| 9   | 21 | 1 | 623.07  | -8.58   | 572.30  | < |
| 10  | 21 | 1 | 0.27    | 8.58    | 25.75   | < |
| -10 | 22 | 1 | 24.82   | 48.65   | 31.48   | < |
| -9  | 22 | 1 | 20.54   | 14.31   | 25.75   | < |
| -8  | 22 | 1 | 24.38   | 25.75   | 17.17   | < |

## paulkerrite.cif

|     |    |   |        |        |           |
|-----|----|---|--------|--------|-----------|
| -7  | 22 | 1 | 5.28   | 8.58   | 14.31 <   |
| -6  | 22 | 1 | 12.73  | 22.89  | 14.31 <   |
| -5  | 22 | 1 | 0.25   | 0.00   | 17.17 <   |
| -3  | 22 | 1 | 129.09 | 68.68  | 25.75 <   |
| -2  | 22 | 1 | 121.13 | 108.74 | 28.62 o   |
| -1  | 22 | 1 | 53.99  | 37.20  | 17.17 <   |
| 0   | 22 | 1 | 27.59  | 28.62  | 20.03 <   |
| 1   | 22 | 1 | 39.96  | 28.62  | 22.89 <   |
| 2   | 22 | 1 | 312.53 | 197.44 | 37.20 o   |
| 3   | 22 | 1 | 184.45 | 65.81  | 22.89 <   |
| 5   | 22 | 1 | 0.03   | 8.58   | 14.31 <   |
| 6   | 22 | 1 | 89.27  | 25.75  | 17.17 <   |
| 7   | 22 | 1 | 19.27  | 14.31  | 11.45 <   |
| 8   | 22 | 1 | 9.90   | 14.31  | 11.45 <   |
| 9   | 22 | 1 | 2.53   | -2.86  | 17.17 <   |
| 10  | 22 | 1 | 105.40 | 68.68  | 48.65 <   |
| -10 | 23 | 1 | 146.82 | 65.81  | 34.34 <   |
| -9  | 23 | 1 | 46.46  | 14.31  | 25.75 <   |
| -8  | 23 | 1 | 575.76 | -37.20 | 970.05 <  |
| -7  | 23 | 1 | 418.47 | 517.93 | 77.26 o   |
| -6  | 23 | 1 | 13.20  | 17.17  | 14.31 <   |
| -5  | 23 | 1 | 11.71  | 2.86   | 11.45 <   |
| -3  | 23 | 1 | 192.36 | 131.63 | 37.20 o   |
| -2  | 23 | 1 | 17.12  | 37.20  | 17.17 <   |
| -1  | 23 | 1 | 516.92 | 331.93 | 65.81 o   |
| 0   | 23 | 1 | 2.31   | 11.45  | 17.17 <   |
| 2   | 23 | 1 | 249.66 | 31.48  | 28.62 <   |
| 3   | 23 | 1 | 380.09 | 223.20 | 37.20 o   |
| 5   | 23 | 1 | 2.30   | -2.86  | 14.31 <   |
| 6   | 23 | 1 | 0.54   | 8.58   | 11.45 <   |
| 7   | 23 | 1 | 417.89 | 2.86   | 1044.45 < |
| 8   | 23 | 1 | 404.95 | -20.03 | 37.20 <   |
| 9   | 23 | 1 | 53.71  | 17.17  | 45.78 <   |
| -9  | 24 | 1 | 3.41   | 2.86   | 25.75 <   |
| -8  | 24 | 1 | 16.40  | 2.86   | 34.34 <   |
| -7  | 24 | 1 | 24.98  | 34.34  | 22.89 <   |
| -6  | 24 | 1 | 115.38 | 100.15 | 28.62 o   |
| -5  | 24 | 1 | 2.00   | 8.58   | 14.31 <   |
| -4  | 24 | 1 | 66.79  | 34.34  | 14.31 <   |
| -3  | 24 | 1 | 73.51  | 51.51  | 17.17 <   |
| -2  | 24 | 1 | 133.59 | 97.29  | 22.89 o   |
| -1  | 24 | 1 | 1.78   | 8.58   | 14.31 <   |
| 0   | 24 | 1 | 247.03 | 289.01 | 68.68 o   |
| 1   | 24 | 1 | 0.16   | 5.72   | 25.75 <   |
| 2   | 24 | 1 | 111.56 | 103.01 | 25.75 o   |
| 3   | 24 | 1 | 95.06  | 34.34  | 25.75 <   |
| 4   | 24 | 1 | 17.83  | 5.72   | 20.03 <   |
| 5   | 24 | 1 | 0.22   | -2.86  | 14.31 <   |
| 6   | 24 | 1 | 133.60 | 114.46 | 31.48 o   |
| 7   | 24 | 1 | 10.74  | 31.48  | 17.17 <   |
| 8   | 24 | 1 | 12.68  | 17.17  | 22.89 <   |
| 9   | 24 | 1 | 0.46   | 17.17  | 25.75 <   |
| -8  | 25 | 1 | 133.52 | -5.72  | 20.03 <   |
| -6  | 25 | 1 | 127.46 | 125.91 | 45.78 <   |

## paulkerrite.cif

|     |    |   |          |          |         |   |
|-----|----|---|----------|----------|---------|---|
| -4  | 25 | 1 | 133.48   | 128.77   | 31.48   | o |
| -2  | 25 | 1 | 1764.11  | 990.08   | 120.18  | o |
| -1  | 25 | 1 | 30.35    | 20.03    | 14.31   | < |
| 0   | 25 | 1 | 8.11     | 31.48    | 17.17   | < |
| 1   | 25 | 1 | 8.29     | 20.03    | 20.03   | < |
| 2   | 25 | 1 | 2393.91  | 2277.76  | 143.08  | o |
| 3   | 25 | 1 | 357.10   | 434.95   | 71.54   | o |
| 4   | 25 | 1 | 123.85   | 91.57    | 28.62   | o |
| 6   | 25 | 1 | 39.17    | 25.75    | 14.31   | < |
| 7   | 25 | 1 | 612.36   | -17.17   | 1465.09 | < |
| 8   | 25 | 1 | 128.38   | 197.44   | 54.37   | o |
| -7  | 26 | 1 | 8.18     | -8.58    | 22.89   | < |
| -6  | 26 | 1 | 140.23   | 143.08   | 91.57   | < |
| -5  | 26 | 1 | 7.55     | 5.72     | 20.03   | < |
| -4  | 26 | 1 | 81.23    | 174.55   | 31.48   | o |
| -3  | 26 | 1 | 47.60    | 28.62    | 17.17   | < |
| -2  | 26 | 1 | 268.15   | 77.26    | 51.51   | < |
| -1  | 26 | 1 | 25.00    | 14.31    | 14.31   | < |
| 0   | 26 | 1 | 60.59    | 48.65    | 71.54   | < |
| 1   | 26 | 1 | 11.97    | 5.72     | 17.17   | < |
| 2   | 26 | 1 | 330.09   | 429.23   | 77.26   | o |
| 3   | 26 | 1 | 7.32     | 22.89    | 20.03   | < |
| 4   | 26 | 1 | 101.46   | 117.32   | 25.75   | o |
| 5   | 26 | 1 | 2.29     | 5.72     | 25.75   | < |
| 7   | 26 | 1 | 4.67     | -5.72    | 20.03   | < |
| 8   | 26 | 1 | 41.38    | -8.58    | 25.75   | < |
| -5  | 27 | 1 | 303.49   | -11.45   | 28.62   | < |
| -4  | 27 | 1 | 67.54    | -2.86    | 22.89   | < |
| -3  | 27 | 1 | 122.30   | 51.51    | 25.75   | < |
| -1  | 27 | 1 | 139.64   | 111.60   | 28.62   | o |
| 0   | 27 | 1 | 25.32    | 31.48    | 17.17   | < |
| 1   | 27 | 1 | 231.27   | 223.20   | 65.81   | o |
| 3   | 27 | 1 | 116.18   | 143.08   | 48.65   | < |
| 4   | 27 | 1 | 201.79   | 160.24   | 45.78   | o |
| 5   | 27 | 1 | 336.69   | 701.07   | 103.01  | o |
| 6   | 27 | 1 | 192.65   | -14.31   | 1050.17 | < |
| 7   | 27 | 1 | 7.37     | -5.72    | 28.62   | < |
| 0   | 28 | 1 | 406.00   | 186.00   | 48.65   | o |
| 1   | 28 | 1 | 101.46   | 111.60   | 31.48   | o |
| 2   | 28 | 1 | 4.35     | -5.72    | 25.75   | < |
| 3   | 28 | 1 | 0.70     | -20.03   | 51.51   | < |
| -15 | 0  | 2 | 264.21   | 37.20    | 214.61  | < |
| -14 | 0  | 2 | 14.40    | 22.89    | 25.75   | < |
| -13 | 0  | 2 | 2075.27  | -151.66  | 9734.86 | < |
| -11 | 0  | 2 | 154.86   | 271.84   | 37.20   | o |
| -10 | 0  | 2 | 1212.96  | 1224.73  | 82.98   | o |
| -9  | 0  | 2 | 1830.33  | 1702.60  | 154.52  | o |
| -8  | 0  | 2 | 689.53   | 460.70   | 45.78   | o |
| -7  | 0  | 2 | 650.85   | 749.72   | 54.37   | o |
| -6  | 0  | 2 | 8942.08  | 8985.15  | 440.67  | o |
| -4  | 0  | 2 | 21724.90 | 19458.30 | 932.85  | o |
| -3  | 0  | 2 | 56709.30 | 53189.80 | 2529.58 | o |
| -2  | 0  | 2 | 7123.25  | 5448.32  | 268.98  | o |
| 1   | 0  | 2 | 1560.20  | 1075.93  | 77.26   | o |

## paulkerrite.cif

|     |   |   |          |          |         |   |
|-----|---|---|----------|----------|---------|---|
| 2   | 0 | 2 | 5197.50  | 4478.27  | 309.04  | o |
| 3   | 0 | 2 | 52419.00 | 42673.70 | 2028.81 | o |
| 4   | 0 | 2 | 16244.80 | 13723.80 | 537.96  | o |
| 5   | 0 | 2 | 2991.35  | 2518.13  | 105.88  | o |
| 6   | 0 | 2 | 6222.51  | 5588.53  | 226.06  | o |
| 7   | 0 | 2 | 423.07   | 472.15   | 31.48   | o |
| 8   | 0 | 2 | 130.54   | 48.65    | 17.17   | < |
| 9   | 0 | 2 | 4897.88  | 4521.19  | 228.92  | o |
| 10  | 0 | 2 | 730.49   | 48.65    | 111.60  | < |
| 11  | 0 | 2 | 132.14   | 165.97   | 25.75   | o |
| 12  | 0 | 2 | 3197.54  | 3639.84  | 191.72  | o |
| 13  | 0 | 2 | 1029.30  | -2.86    | 326.21  | < |
| 14  | 0 | 2 | 9.65     | 2.86     | 17.17   | < |
| -15 | 1 | 2 | 0.07     | 0.00     | 11.45   | < |
| -14 | 1 | 2 | 40.40    | 28.62    | 17.17   | < |
| -13 | 1 | 2 | 10.95    | 2.86     | 17.17   | < |
| -12 | 1 | 2 | 0.11     | 2.86     | 17.17   | < |
| -11 | 1 | 2 | 0.90     | 5.72     | 11.45   | < |
| -10 | 1 | 2 | 255.18   | 354.83   | 28.62   | o |
| -9  | 1 | 2 | 16.48    | 34.34    | 14.31   | < |
| -8  | 1 | 2 | 0.50     | 34.34    | 17.17   | < |
| -7  | 1 | 2 | 615.89   | 663.87   | 37.20   | o |
| -6  | 1 | 2 | 726.01   | 824.11   | 40.06   | o |
| -5  | 1 | 2 | 1293.81  | 1173.22  | 68.68   | o |
| -4  | 1 | 2 | 278.82   | 326.21   | 22.89   | o |
| -3  | 1 | 2 | 444.28   | 454.98   | 25.75   | o |
| 0   | 1 | 2 | 268.15   | 263.26   | 14.31   | o |
| 2   | 1 | 2 | 283.95   | 191.72   | 17.17   | o |
| 4   | 1 | 2 | 382.46   | 346.24   | 14.31   | o |
| 5   | 1 | 2 | 368.65   | 372.00   | 22.89   | o |
| 7   | 1 | 2 | 58.29    | 25.75    | 11.45   | < |
| 8   | 1 | 2 | 292.50   | 289.01   | 25.75   | o |
| 9   | 1 | 2 | 24.15    | 37.20    | 14.31   | < |
| 10  | 1 | 2 | 129.74   | 65.81    | 54.37   | < |
| 11  | 1 | 2 | 2.10     | 0.00     | 8.58    | < |
| 12  | 1 | 2 | 11.94    | 22.89    | 20.03   | < |
| 13  | 1 | 2 | 70.00    | 31.48    | 20.03   | < |
| 14  | 1 | 2 | 60.51    | 14.31    | 14.31   | < |
| -15 | 2 | 2 | 68.91    | 8.58     | 17.17   | < |
| -14 | 2 | 2 | 750.05   | 383.44   | 629.53  | < |
| -13 | 2 | 2 | 519.63   | 460.70   | 1167.50 | < |
| -12 | 2 | 2 | 298.72   | 154.52   | 1213.28 | < |
| -11 | 2 | 2 | 1.46     | 51.51    | 17.17   | < |
| -10 | 2 | 2 | 4787.39  | 5814.59  | 191.72  | o |
| -9  | 2 | 2 | 4226.31  | 4838.82  | 163.11  | o |
| -8  | 2 | 2 | 15206.90 | 17415.20 | 540.83  | o |
| -7  | 2 | 2 | 940.41   | 1110.27  | 45.78   | o |
| -6  | 2 | 2 | 6595.25  | 6123.63  | 251.81  | o |
| -5  | 2 | 2 | 10336.00 | 9823.57  | 480.73  | o |
| -4  | 2 | 2 | 14222.60 | 13008.40 | 443.53  | o |
| -3  | 2 | 2 | 10379.40 | 10447.40 | 360.55  | o |
| -2  | 2 | 2 | 61947.30 | 50620.10 | 1968.72 | o |
| 1   | 2 | 2 | 3248.06  | 3516.80  | 114.46  | o |
| 3   | 2 | 2 | 9299.21  | 8464.35  | 331.93  | o |

## paulkerrite.cif

|     |   |   |          |          |           |
|-----|---|---|----------|----------|-----------|
| 7   | 2 | 2 | 1956.35  | 1880.01  | 65.81 o   |
| 8   | 2 | 2 | 16347.30 | 14782.60 | 452.12 o  |
| 9   | 2 | 2 | 3948.99  | 3865.90  | 271.84 o  |
| 10  | 2 | 2 | 3981.85  | 3545.41  | 120.18 o  |
| 11  | 2 | 2 | 77.80    | 68.68    | 40.06 <   |
| 13  | 2 | 2 | 531.38   | 203.17   | 94.43 <   |
| -15 | 3 | 2 | 57.70    | 5.72     | 14.31 <   |
| -14 | 3 | 2 | 123.01   | 57.23    | 17.17 o   |
| -13 | 3 | 2 | 127.88   | 94.43    | 157.38 <  |
| -12 | 3 | 2 | 177.16   | 125.91   | 546.55 <  |
| -11 | 3 | 2 | 5.10     | 0.00     | 14.31 <   |
| -10 | 3 | 2 | 0.06     | -8.58    | 14.31 <   |
| -9  | 3 | 2 | 513.53   | 603.78   | 34.34 o   |
| -8  | 3 | 2 | 1064.48  | 1107.41  | 48.65 o   |
| -7  | 3 | 2 | 7.29     | 11.45    | 11.45 <   |
| -6  | 3 | 2 | 1383.62  | 1193.25  | 54.37 o   |
| -4  | 3 | 2 | 2093.31  | 2266.32  | 77.26 o   |
| -3  | 3 | 2 | 1713.11  | 2126.10  | 71.54 o   |
| -2  | 3 | 2 | 1046.49  | 1033.01  | 51.51 o   |
| 0   | 3 | 2 | 21.04    | 57.23    | 8.58 o    |
| 1   | 3 | 2 | 402.17   | 329.07   | 17.17 o   |
| 2   | 3 | 2 | 554.59   | 592.33   | 31.48 o   |
| 3   | 3 | 2 | 1930.76  | 2440.87  | 88.71 o   |
| 5   | 3 | 2 | 744.16   | 580.89   | 28.62 o   |
| 6   | 3 | 2 | 1008.21  | 892.79   | 51.51 o   |
| 7   | 3 | 2 | 0.13     | 0.00     | 60.09 <   |
| 8   | 3 | 2 | 907.10   | 746.85   | 42.92 o   |
| 9   | 3 | 2 | 345.29   | 191.72   | 54.37 o   |
| 10  | 3 | 2 | 28.15    | 31.48    | 14.31 <   |
| 11  | 3 | 2 | 0.15     | -2.86    | 8.58 <    |
| 12  | 3 | 2 | 130.90   | 85.85    | 17.17 o   |
| 13  | 3 | 2 | 67.85    | 34.34    | 14.31 <   |
| 14  | 3 | 2 | 102.53   | 14.31    | 20.03 <   |
| -15 | 4 | 2 | 159.06   | 22.89    | 137.35 <  |
| -14 | 4 | 2 | 17.01    | 25.75    | 17.17 <   |
| -13 | 4 | 2 | 462.47   | 400.61   | 223.20 <  |
| -12 | 4 | 2 | 56.45    | 94.43    | 22.89 o   |
| -11 | 4 | 2 | 102.14   | 148.80   | 25.75 o   |
| -9  | 4 | 2 | 2062.22  | 2615.42  | 97.29 o   |
| -8  | 4 | 2 | 1240.72  | 1113.13  | 48.65 o   |
| -7  | 4 | 2 | 4004.80  | 4008.98  | 134.49 o  |
| -6  | 4 | 2 | 27591.30 | 28008.50 | 852.73 o  |
| -4  | 4 | 2 | 13921.80 | 14224.60 | 560.86 o  |
| -3  | 4 | 2 | 55076.20 | 59304.80 | 1791.31 o |
| -2  | 4 | 2 | 18050.30 | 16963.00 | 520.79 o  |
| 2   | 4 | 2 | 17342.30 | 16067.40 | 543.69 o  |
| 3   | 4 | 2 | 60144.50 | 75317.90 | 3565.44 o |
| 4   | 4 | 2 | 11669.80 | 11626.30 | 460.70 o  |
| 6   | 4 | 2 | 32249.50 | 30558.10 | 1038.73 o |
| 7   | 4 | 2 | 2670.94  | 2566.78  | 108.74 o  |
| 8   | 4 | 2 | 551.93   | 383.44   | 28.62 o   |
| 9   | 4 | 2 | 3111.99  | 3159.11  | 226.06 o  |
| 10  | 4 | 2 | 3481.99  | 3090.43  | 140.21 o  |
| 11  | 4 | 2 | 0.01     | 40.06    | 14.31 <   |



## paulkerrite.cif

|     |   |   |          |          |           |
|-----|---|---|----------|----------|-----------|
| 12  | 4 | 2 | 5.74     | 14.31    | 11.45 <   |
| 13  | 4 | 2 | 178.43   | 123.04   | 123.04 <  |
| 14  | 4 | 2 | 49.50    | 2.86     | 25.75 <   |
| -15 | 5 | 2 | 3.01     | 2.86     | 20.03 <   |
| -14 | 5 | 2 | 0.45     | 0.00     | 14.31 <   |
| -13 | 5 | 2 | 1.36     | 5.72     | 14.31 <   |
| -12 | 5 | 2 | 52.92    | 77.26    | 22.89 o   |
| -11 | 5 | 2 | 0.65     | -8.58    | 14.31 <   |
| -10 | 5 | 2 | 27.72    | 8.58     | 14.31 <   |
| -9  | 5 | 2 | 259.14   | 274.70   | 22.89 o   |
| -8  | 5 | 2 | 605.88   | 678.18   | 34.34 o   |
| -7  | 5 | 2 | 421.15   | 457.84   | 28.62 o   |
| -6  | 5 | 2 | 18.32    | 60.09    | 14.31 o   |
| -5  | 5 | 2 | 164.13   | 237.51   | 17.17 o   |
| -3  | 5 | 2 | 2449.86  | 2140.41  | 74.40 o   |
| -1  | 5 | 2 | 676.29   | 583.75   | 25.75 o   |
| 0   | 5 | 2 | 67.62    | 65.81    | 11.45 o   |
| 2   | 5 | 2 | 994.29   | 829.84   | 42.92 o   |
| 5   | 5 | 2 | 45.12    | 74.40    | 11.45 o   |
| 6   | 5 | 2 | 147.40   | 183.14   | 17.17 o   |
| 7   | 5 | 2 | 186.31   | 234.64   | 22.89 o   |
| 8   | 5 | 2 | 450.41   | 503.63   | 40.06 o   |
| 9   | 5 | 2 | 145.96   | 62.95    | 17.17 o   |
| 10  | 5 | 2 | 0.07     | -2.86    | 11.45 <   |
| 11  | 5 | 2 | 25.08    | 22.89    | 11.45 <   |
| 12  | 5 | 2 | 22.11    | 14.31    | 11.45 <   |
| 13  | 5 | 2 | 1.60     | 5.72     | 14.31 <   |
| 14  | 5 | 2 | 24.95    | -5.72    | 22.89 <   |
| -15 | 6 | 2 | 257.84   | 25.75    | 31.48 <   |
| -14 | 6 | 2 | 886.46   | 94.43    | 386.30 <  |
| -13 | 6 | 2 | 38.18    | 8.58     | 14.31 <   |
| -12 | 6 | 2 | 68.16    | 60.09    | 25.75 <   |
| -11 | 6 | 2 | 73.81    | 82.98    | 326.21 <  |
| -9  | 6 | 2 | 428.65   | 403.47   | 82.98 o   |
| -8  | 6 | 2 | 6654.68  | 7119.44  | 254.68 o  |
| -7  | 6 | 2 | 891.28   | 1012.98  | 48.65 o   |
| -6  | 6 | 2 | 21.61    | 34.34    | 14.31 <   |
| -5  | 6 | 2 | 2649.24  | 2515.27  | 97.29 o   |
| -4  | 6 | 2 | 96006.00 | 97694.90 | 3848.73 o |
| -3  | 6 | 2 | 12.66    | 42.92    | 11.45 o   |
| 3   | 6 | 2 | 9.78     | 45.78    | 11.45 o   |
| 4   | 6 | 2 | 89538.00 | 82136.80 | 2772.80 o |
| 6   | 6 | 2 | 147.66   | 128.77   | 17.17 o   |
| 8   | 6 | 2 | 5973.14  | 5717.30  | 251.81 o  |
| 9   | 6 | 2 | 206.68   | 103.01   | 25.75 o   |
| 10  | 6 | 2 | 14554.80 | 19063.40 | 921.41 o  |
| 11  | 6 | 2 | 38.72    | 71.54    | 17.17 o   |
| 12  | 6 | 2 | 11.96    | 5.72     | 11.45 <   |
| 13  | 6 | 2 | 57.53    | 28.62    | 97.29 <   |
| 14  | 6 | 2 | 923.70   | 5.72     | 429.23 <  |
| -15 | 7 | 2 | 1.79     | 11.45    | 37.20 <   |
| -14 | 7 | 2 | 12.19    | -8.58    | 14.31 <   |
| -13 | 7 | 2 | 0.13     | -5.72    | 14.31 <   |
| -12 | 7 | 2 | 51.80    | 31.48    | 22.89 <   |

## paulkerrite.cif

|     |   |   |          |          |           |
|-----|---|---|----------|----------|-----------|
| -11 | 7 | 2 | 5.41     | -5.72    | 14.31 <   |
| -10 | 7 | 2 | 20.78    | 22.89    | 17.17 <   |
| -9  | 7 | 2 | 3.74     | 5.72     | 17.17 <   |
| -8  | 7 | 2 | 6.63     | 5.72     | 14.31 <   |
| -7  | 7 | 2 | 6.22     | 25.75    | 20.03 <   |
| -6  | 7 | 2 | 55.84    | 65.81    | 14.31 o   |
| -5  | 7 | 2 | 16.05    | 5.72     | 11.45 <   |
| -4  | 7 | 2 | 81.31    | 91.57    | 14.31 o   |
| -3  | 7 | 2 | 596.82   | 566.58   | 37.20 o   |
| -2  | 7 | 2 | 113.51   | 177.41   | 17.17 o   |
| 0   | 7 | 2 | 19.07    | 34.34    | 8.58 o    |
| 1   | 7 | 2 | 179.29   | 231.78   | 20.03 o   |
| 2   | 7 | 2 | 158.02   | 174.55   | 17.17 o   |
| 3   | 7 | 2 | 459.20   | 389.17   | 28.62 o   |
| 4   | 7 | 2 | 149.98   | 74.40    | 20.03 o   |
| 5   | 7 | 2 | 4.07     | -2.86    | 8.58 <    |
| 6   | 7 | 2 | 93.56    | 68.68    | 17.17 o   |
| 7   | 7 | 2 | 0.38     | 11.45    | 11.45 <   |
| 8   | 7 | 2 | 11.31    | 8.58     | 14.31 <   |
| 9   | 7 | 2 | 0.08     | 11.45    | 14.31 <   |
| 10  | 7 | 2 | 3.52     | 8.58     | 17.17 <   |
| 11  | 7 | 2 | 26.94    | 34.34    | 14.31 <   |
| 12  | 7 | 2 | 79.60    | 42.92    | 37.20 <   |
| 13  | 7 | 2 | 3.34     | 5.72     | 14.31 <   |
| 14  | 7 | 2 | 45.65    | 0.00     | 20.03 <   |
| -14 | 8 | 2 | 0.01     | 0.00     | 17.17 <   |
| -13 | 8 | 2 | 6.91     | 5.72     | 22.89 <   |
| -12 | 8 | 2 | 2362.27  | 3207.75  | 157.38 o  |
| -11 | 8 | 2 | 98.84    | 137.35   | 22.89 o   |
| -10 | 8 | 2 | 402.41   | 349.10   | 34.34 o   |
| -9  | 8 | 2 | 206.85   | 125.91   | 22.89 o   |
| -8  | 8 | 2 | 30.54    | 37.20    | 14.31 <   |
| -7  | 8 | 2 | 2334.66  | 2741.33  | 105.88 o  |
| -6  | 8 | 2 | 6435.57  | 7354.08  | 263.26 o  |
| -5  | 8 | 2 | 71.03    | 183.14   | 28.62 o   |
| -4  | 8 | 2 | 4425.39  | 4715.77  | 211.75 o  |
| -2  | 8 | 2 | 824.61   | 927.13   | 51.51 o   |
| 1   | 8 | 2 | 27486.30 | 23905.10 | 990.08 o  |
| 2   | 8 | 2 | 783.12   | 889.93   | 51.51 o   |
| 4   | 8 | 2 | 3286.45  | 2669.79  | 120.18 o  |
| 5   | 8 | 2 | 507.29   | 460.70   | 34.34 o   |
| 6   | 8 | 2 | 5025.41  | 4807.34  | 206.03 o  |
| 8   | 8 | 2 | 4.56     | 8.58     | 14.31 <   |
| 9   | 8 | 2 | 50.35    | 28.62    | 14.31 <   |
| 10  | 8 | 2 | 445.52   | 143.08   | 246.09 <  |
| 11  | 8 | 2 | 139.71   | 165.97   | 140.21 <  |
| 12  | 8 | 2 | 2352.20  | -97.29   | 1588.14 < |
| 13  | 8 | 2 | 59.32    | 34.34    | 31.48 <   |
| 14  | 8 | 2 | 19.24    | 0.00     | 20.03 <   |
| -14 | 9 | 2 | 55.17    | 8.58     | 20.03 <   |
| -13 | 9 | 2 | 79.69    | 25.75    | 20.03 <   |
| -12 | 9 | 2 | 33.22    | 17.17    | 22.89 <   |
| -11 | 9 | 2 | 96.46    | 82.98    | 88.71 <   |
| -10 | 9 | 2 | 293.98   | 257.54   | 54.37 o   |

## paulkerrite.cif

|     |    |   |          |          |           |
|-----|----|---|----------|----------|-----------|
| -9  | 9  | 2 | 0.38     | 2.86     | 14.31 <   |
| -8  | 9  | 2 | 63.89    | 37.20    | 14.31 <   |
| -7  | 9  | 2 | 364.55   | 386.30   | 28.62 o   |
| -5  | 9  | 2 | 703.06   | 701.07   | 42.92 o   |
| -4  | 9  | 2 | 1374.05  | 1167.50  | 60.09 o   |
| -1  | 9  | 2 | 556.18   | 260.40   | 48.65 o   |
| 3   | 9  | 2 | 636.65   | 515.07   | 31.48 o   |
| 4   | 9  | 2 | 632.36   | 409.20   | 37.20 o   |
| 5   | 9  | 2 | 608.53   | 549.41   | 45.78 o   |
| 7   | 9  | 2 | 49.78    | 80.12    | 17.17 o   |
| 8   | 9  | 2 | 8.99     | 14.31    | 11.45 <   |
| 9   | 9  | 2 | 0.48     | 5.72     | 14.31 <   |
| 10  | 9  | 2 | 219.88   | 231.78   | 31.48 o   |
| 11  | 9  | 2 | 89.26    | 68.68    | 20.03 o   |
| 12  | 9  | 2 | 8.86     | 5.72     | 11.45 <   |
| 13  | 9  | 2 | 81.96    | 48.65    | 80.12 <   |
| 14  | 9  | 2 | 24.29    | 8.58     | 20.03 <   |
| -14 | 10 | 2 | 273.45   | 54.37    | 37.20 <   |
| -13 | 10 | 2 | 146.11   | 42.92    | 37.20 <   |
| -12 | 10 | 2 | 890.72   | 1038.73  | 68.68 o   |
| -11 | 10 | 2 | 10.68    | 57.23    | 20.03 <   |
| -9  | 10 | 2 | 1504.93  | 1147.47  | 117.32 o  |
| -8  | 10 | 2 | 5457.34  | 6484.19  | 268.98 o  |
| -7  | 10 | 2 | 629.66   | 1064.48  | 1070.21 < |
| -6  | 10 | 2 | 16664.30 | 19973.40 | 961.47 o  |
| -5  | 10 | 2 | 743.86   | 1084.51  | 62.95 o   |
| -4  | 10 | 2 | 49691.80 | 43806.90 | 1759.83 o |
| -2  | 10 | 2 | 37505.10 | 35474.20 | 2403.67 o |
| 3   | 10 | 2 | 193.62   | 200.31   | 22.89 o   |
| 5   | 10 | 2 | 953.14   | 469.29   | 71.54 o   |
| 11  | 10 | 2 | 202.61   | 120.18   | 34.34 o   |
| 12  | 10 | 2 | 580.92   | 506.49   | 864.18 <  |
| 13  | 10 | 2 | 222.65   | 91.57    | 31.48 <   |
| 14  | 10 | 2 | 127.77   | 5.72     | 22.89 <   |
| -14 | 11 | 2 | 11.87    | 11.45    | 31.48 <   |
| -13 | 11 | 2 | 0.89     | -5.72    | 20.03 <   |
| -12 | 11 | 2 | 98.88    | 45.78    | 34.34 <   |
| -11 | 11 | 2 | 97.12    | 68.68    | 20.03 o   |
| -10 | 11 | 2 | 368.08   | 165.97   | 148.80 <  |
| -9  | 11 | 2 | 1.90     | 11.45    | 17.17 <   |
| -8  | 11 | 2 | 538.08   | 557.99   | 51.51 o   |
| -7  | 11 | 2 | 36.58    | 17.17    | 14.31 <   |
| -6  | 11 | 2 | 586.75   | 778.33   | 62.95 o   |
| -5  | 11 | 2 | 949.48   | 683.90   | 48.65 o   |
| -4  | 11 | 2 | 111.14   | 191.72   | 22.89 o   |
| -3  | 11 | 2 | 9.42     | 11.45    | 11.45 <   |
| -2  | 11 | 2 | 160.77   | 157.38   | 20.03 o   |
| -1  | 11 | 2 | 24.04    | 40.06    | 22.89 <   |
| 0   | 11 | 2 | 2.53     | 17.17    | 17.17 <   |
| 1   | 11 | 2 | 20.78    | 25.75    | 14.31 <   |
| 3   | 11 | 2 | 36.69    | 17.17    | 14.31 <   |
| 4   | 11 | 2 | 296.21   | 137.35   | 25.75 o   |
| 5   | 11 | 2 | 607.30   | 188.86   | 51.51 o   |
| 7   | 11 | 2 | 6.89     | 8.58     | 11.45 <   |

## paulkerrite.cif

|     |    |   |         |         |         |   |
|-----|----|---|---------|---------|---------|---|
| 8   | 11 | 2 | 253.39  | 191.72  | 31.48   | o |
| 9   | 11 | 2 | 7.00    | 14.31   | 17.17   | < |
| 10  | 11 | 2 | 133.23  | 143.08  | 28.62   | o |
| 11  | 11 | 2 | 55.36   | 45.78   | 20.03   | < |
| 12  | 11 | 2 | 94.76   | 62.95   | 22.89   | < |
| 13  | 11 | 2 | 7.39    | 14.31   | 22.89   | < |
| 14  | 11 | 2 | 28.07   | 8.58    | 25.75   | < |
| -13 | 12 | 2 | 559.48  | -34.34  | 400.61  | < |
| -12 | 12 | 2 | 1581.47 | 950.02  | 869.90  | < |
| -11 | 12 | 2 | 6.30    | 37.20   | 22.89   | < |
| -10 | 12 | 2 | 231.36  | 240.37  | 51.51   | o |
| -9  | 12 | 2 | 921.45  | 703.93  | 97.29   | o |
| -8  | 12 | 2 | 31.03   | 0.00    | 17.17   | < |
| -7  | 12 | 2 | 310.06  | 477.87  | 42.92   | o |
| -6  | 12 | 2 | 272.20  | 277.57  | 25.75   | o |
| -5  | 12 | 2 | 731.44  | 586.61  | 37.20   | o |
| -3  | 12 | 2 | 1546.44 | 1221.87 | 65.81   | o |
| -2  | 12 | 2 | 157.88  | 77.26   | 14.31   | o |
| -1  | 12 | 2 | 518.82  | 549.41  | 45.78   | o |
| 4   | 12 | 2 | 1166.09 | 812.67  | 60.09   | o |
| 5   | 12 | 2 | 454.96  | 251.81  | 31.48   | o |
| 6   | 12 | 2 | 176.15  | 85.85   | 22.89   | o |
| 7   | 12 | 2 | 554.80  | 460.70  | 60.09   | o |
| 8   | 12 | 2 | 30.59   | 5.72    | 14.31   | < |
| 10  | 12 | 2 | 358.88  | 343.38  | 71.54   | o |
| 11  | 12 | 2 | 20.54   | 34.34   | 20.03   | < |
| 12  | 12 | 2 | 1665.49 | -60.09  | 3677.04 | < |
| 13  | 12 | 2 | 358.86  | 34.34   | 31.48   | < |
| -13 | 13 | 2 | 12.69   | 0.00    | 17.17   | < |
| -12 | 13 | 2 | 113.66  | 2.86    | 62.95   | < |
| -11 | 13 | 2 | 15.70   | 8.58    | 17.17   | < |
| -10 | 13 | 2 | 39.47   | 20.03   | 17.17   | < |
| -9  | 13 | 2 | 37.41   | 25.75   | 17.17   | < |
| -8  | 13 | 2 | 19.82   | 22.89   | 20.03   | < |
| -7  | 13 | 2 | 110.56  | 100.15  | 22.89   | o |
| -5  | 13 | 2 | 171.35  | 114.46  | 17.17   | o |
| -4  | 13 | 2 | 67.80   | 51.51   | 11.45   | o |
| -3  | 13 | 2 | 38.60   | 54.37   | 14.31   | o |
| -2  | 13 | 2 | 7.89    | 31.48   | 11.45   | < |
| -1  | 13 | 2 | 5.65    | 45.78   | 14.31   | o |
| 0   | 13 | 2 | 21.01   | 14.31   | 11.45   | < |
| 1   | 13 | 2 | 271.95  | 131.63  | 22.89   | o |
| 2   | 13 | 2 | 89.89   | 40.06   | 14.31   | < |
| 3   | 13 | 2 | 30.86   | 57.23   | 20.03   | < |
| 4   | 13 | 2 | 1.60    | 25.75   | 11.45   | < |
| 5   | 13 | 2 | 30.80   | 37.20   | 14.31   | < |
| 7   | 13 | 2 | 108.37  | 22.89   | 20.03   | < |
| 8   | 13 | 2 | 27.05   | 17.17   | 14.31   | < |
| 9   | 13 | 2 | 2.64    | 14.31   | 17.17   | < |
| 10  | 13 | 2 | 26.59   | 31.48   | 20.03   | < |
| 11  | 13 | 2 | 5.66    | 0.00    | 17.17   | < |
| 12  | 13 | 2 | 137.50  | 85.85   | 31.48   | < |
| 13  | 13 | 2 | 12.63   | 20.03   | 28.62   | < |
| -13 | 14 | 2 | 118.16  | 14.31   | 34.34   | < |

## paulkerrite.cif

|     |    |   |          |          |           |
|-----|----|---|----------|----------|-----------|
| -11 | 14 | 2 | 28.15    | 17.17    | 17.17 <   |
| -10 | 14 | 2 | 3986.55  | 4655.68  | 254.68 o  |
| -9  | 14 | 2 | 196.68   | 257.54   | 37.20 o   |
| -8  | 14 | 2 | 6032.34  | 4984.75  | 266.12 o  |
| -7  | 14 | 2 | 27.68    | 82.98    | 20.03 o   |
| -6  | 14 | 2 | 1418.73  | 1136.02  | 68.68 o   |
| -5  | 14 | 2 | 251.57   | 194.58   | 25.75 o   |
| -4  | 14 | 2 | 3792.80  | 3751.44  | 171.69 o  |
| -3  | 14 | 2 | 1858.36  | 1505.16  | 97.29 o   |
| -2  | 14 | 2 | 8313.38  | 7314.02  | 366.27 o  |
| 5   | 14 | 2 | 67.37    | 62.95    | 17.17 o   |
| 6   | 14 | 2 | 732.52   | 114.46   | 183.14 <  |
| 7   | 14 | 2 | 232.28   | 62.95    | 22.89 <   |
| 8   | 14 | 2 | 4498.76  | -165.97  | 1954.41 < |
| 9   | 14 | 2 | 621.00   | 88.71    | 752.58 <  |
| 10  | 14 | 2 | 4934.20  | -171.69  | 3968.92 < |
| 11  | 14 | 2 | 0.46     | 22.89    | 20.03 <   |
| 12  | 14 | 2 | 1122.03  | -54.37   | 826.98 <  |
| 13  | 14 | 2 | 53.91    | 17.17    | 28.62 <   |
| -13 | 15 | 2 | 22.95    | -8.58    | 25.75 <   |
| -12 | 15 | 2 | 95.20    | 17.17    | 17.17 <   |
| -11 | 15 | 2 | 62.01    | 17.17    | 17.17 <   |
| -10 | 15 | 2 | 80.84    | 100.15   | 25.75 o   |
| -9  | 15 | 2 | 206.00   | 163.11   | 28.62 o   |
| -8  | 15 | 2 | 778.97   | 283.29   | 1207.56 < |
| -7  | 15 | 2 | 18.46    | 2.86     | 11.45 <   |
| -6  | 15 | 2 | 17.08    | 17.17    | 20.03 <   |
| -5  | 15 | 2 | 136.52   | 51.51    | 17.17 <   |
| -3  | 15 | 2 | 293.26   | 217.48   | 31.48 o   |
| 0   | 15 | 2 | 53.62    | 25.75    | 14.31 <   |
| 2   | 15 | 2 | 316.37   | 251.81   | 25.75 o   |
| 3   | 15 | 2 | 187.16   | 82.98    | 22.89 o   |
| 5   | 15 | 2 | 6.02     | 42.92    | 17.17 <   |
| 6   | 15 | 2 | 12.58    | 8.58     | 11.45 <   |
| 7   | 15 | 2 | 16.22    | 0.00     | 20.03 <   |
| 8   | 15 | 2 | 689.93   | 51.51    | 500.77 <  |
| 9   | 15 | 2 | 119.96   | 42.92    | 60.09 <   |
| 10  | 15 | 2 | 215.59   | 108.74   | 62.95 <   |
| 11  | 15 | 2 | 74.47    | 54.37    | 25.75 <   |
| 12  | 15 | 2 | 78.49    | 54.37    | 28.62 <   |
| 13  | 15 | 2 | 6.97     | 11.45    | 25.75 <   |
| -12 | 16 | 2 | 442.16   | 88.71    | 45.78 <   |
| -11 | 16 | 2 | 0.18     | 2.86     | 17.17 <   |
| -10 | 16 | 2 | 2434.67  | 1204.70  | 1230.45 < |
| -9  | 16 | 2 | 718.37   | 1021.56  | 82.98 o   |
| -8  | 16 | 2 | 226.52   | 134.49   | 34.34 o   |
| -7  | 16 | 2 | 1345.68  | 927.13   | 74.40 o   |
| -6  | 16 | 2 | 18680.40 | 15480.80 | 563.72 o  |
| -5  | 16 | 2 | 205.23   | 62.95    | 25.75 <   |
| -1  | 16 | 2 | 28.94    | 14.31    | 14.31 <   |
| 1   | 16 | 2 | 59.02    | 20.03    | 17.17 <   |
| 5   | 16 | 2 | 97.19    | -2.86    | 28.62 <   |
| 8   | 16 | 2 | 81.23    | 54.37    | 17.17 o   |
| 9   | 16 | 2 | 842.82   | 48.65    | 1035.87 < |

## paulkerrite.cif

|     |    |   |         |         |           |
|-----|----|---|---------|---------|-----------|
| 11  | 16 | 2 | 9.97    | 17.17   | 45.78 <   |
| 12  | 16 | 2 | 545.29  | 351.97  | 77.26 o   |
| 13  | 16 | 2 | 39.34   | 60.09   | 48.65 <   |
| -12 | 17 | 2 | 0.14    | 5.72    | 28.62 <   |
| -11 | 17 | 2 | 22.69   | 8.58    | 20.03 <   |
| -10 | 17 | 2 | 74.36   | 48.65   | 20.03 <   |
| -9  | 17 | 2 | 50.85   | 42.92   | 22.89 <   |
| -8  | 17 | 2 | 25.86   | 17.17   | 17.17 <   |
| -7  | 17 | 2 | 28.66   | 28.62   | 14.31 <   |
| -6  | 17 | 2 | 520.27  | 340.52  | 42.92 o   |
| -5  | 17 | 2 | 262.23  | 145.94  | 25.75 o   |
| -4  | 17 | 2 | 74.30   | 34.34   | 20.03 <   |
| -3  | 17 | 2 | 5.33    | 0.00    | 14.31 <   |
| -2  | 17 | 2 | 239.08  | 71.54   | 28.62 <   |
| -1  | 17 | 2 | 10.12   | 20.03   | 88.71 <   |
| 0   | 17 | 2 | 28.96   | 28.62   | 17.17 <   |
| 1   | 17 | 2 | 30.36   | 17.17   | 20.03 <   |
| 2   | 17 | 2 | 85.40   | 97.29   | 28.62 o   |
| 3   | 17 | 2 | 56.82   | 5.72    | 14.31 <   |
| 4   | 17 | 2 | 137.02  | 42.92   | 14.31 <   |
| 5   | 17 | 2 | 141.08  | 57.23   | 20.03 <   |
| 7   | 17 | 2 | 79.27   | 28.62   | 14.31 <   |
| 8   | 17 | 2 | 0.31    | 11.45   | 14.31 <   |
| 9   | 17 | 2 | 56.67   | 25.75   | 17.17 <   |
| 10  | 17 | 2 | 62.02   | 5.72    | 22.89 <   |
| 11  | 17 | 2 | 15.31   | 20.03   | 20.03 <   |
| 12  | 17 | 2 | 0.68    | -5.72   | 22.89 <   |
| -12 | 18 | 2 | 85.54   | -25.75  | 28.62 <   |
| -11 | 18 | 2 | 19.73   | 31.48   | 31.48 <   |
| -10 | 18 | 2 | 1817.59 | 82.98   | 640.98 <  |
| -9  | 18 | 2 | 242.16  | 168.83  | 54.37 o   |
| -7  | 18 | 2 | 62.73   | 82.98   | 17.17 o   |
| -4  | 18 | 2 | 3515.01 | 2143.27 | 406.33 o  |
| -3  | 18 | 2 | 18.17   | 14.31   | 14.31 <   |
| -1  | 18 | 2 | 193.23  | 57.23   | 17.17 o   |
| 0   | 18 | 2 | 99.09   | 25.75   | 31.48 <   |
| 1   | 18 | 2 | 136.65  | 22.89   | 20.03 <   |
| 3   | 18 | 2 | 112.52  | 74.40   | 28.62 <   |
| 5   | 18 | 2 | 665.14  | -14.31  | 137.35 <  |
| 6   | 18 | 2 | 811.01  | 972.91  | 94.43 o   |
| 7   | 18 | 2 | 189.17  | -8.58   | 363.41 <  |
| 8   | 18 | 2 | 2246.32 | 65.81   | 1362.08 < |
| 9   | 18 | 2 | 71.01   | 80.12   | 20.03 o   |
| 10  | 18 | 2 | 1376.60 | 2.86    | 1033.01 < |
| 11  | 18 | 2 | 2.76    | 28.62   | 22.89 <   |
| 12  | 18 | 2 | 165.75  | 8.58    | 45.78 <   |
| -12 | 19 | 2 | 4.15    | -14.31  | 45.78 <   |
| -11 | 19 | 2 | 0.04    | -2.86   | 22.89 <   |
| -10 | 19 | 2 | 21.96   | 8.58    | 14.31 <   |
| -9  | 19 | 2 | 22.78   | 17.17   | 17.17 <   |
| -8  | 19 | 2 | 7.10    | 11.45   | 20.03 <   |
| -7  | 19 | 2 | 107.05  | 71.54   | 17.17 o   |
| -6  | 19 | 2 | 29.66   | 20.03   | 11.45 <   |
| -5  | 19 | 2 | 283.58  | 165.97  | 31.48 o   |

## paulkerrite.cif

|     |    |   |         |        |           |
|-----|----|---|---------|--------|-----------|
| -4  | 19 | 2 | 395.34  | 11.45  | 2214.81 < |
| -3  | 19 | 2 | 2.05    | 17.17  | 17.17 <   |
| -2  | 19 | 2 | 1.76    | 14.31  | 14.31 <   |
| -1  | 19 | 2 | 0.88    | 57.23  | 22.89 <   |
| 0   | 19 | 2 | 7.21    | 11.45  | 17.17 <   |
| 1   | 19 | 2 | 170.48  | 60.09  | 20.03 <   |
| 2   | 19 | 2 | 86.86   | 22.89  | 20.03 <   |
| 3   | 19 | 2 | 46.93   | 11.45  | 20.03 <   |
| 5   | 19 | 2 | 164.55  | 31.48  | 37.20 <   |
| 6   | 19 | 2 | 74.62   | 25.75  | 14.31 <   |
| 7   | 19 | 2 | 30.24   | 28.62  | 11.45 <   |
| 8   | 19 | 2 | 9.34    | 14.31  | 14.31 <   |
| 9   | 19 | 2 | 11.79   | 11.45  | 17.17 <   |
| 10  | 19 | 2 | 20.12   | 8.58   | 14.31 <   |
| 11  | 19 | 2 | 3.63    | -5.72  | 22.89 <   |
| -11 | 20 | 2 | 13.92   | -8.58  | 22.89 <   |
| -10 | 20 | 2 | 3.26    | 51.51  | 48.65 <   |
| -9  | 20 | 2 | 0.49    | 25.75  | 17.17 <   |
| -8  | 20 | 2 | 87.58   | 45.78  | 17.17 <   |
| -7  | 20 | 2 | 10.29   | 20.03  | 14.31 <   |
| -5  | 20 | 2 | 17.14   | 48.65  | 14.31 o   |
| -4  | 20 | 2 | 3930.85 | 612.36 | 1113.13 < |
| -3  | 20 | 2 | 9.94    | 5.72   | 11.45 <   |
| -2  | 20 | 2 | 172.94  | 42.92  | 17.17 <   |
| -1  | 20 | 2 | 215.73  | 77.26  | 20.03 o   |
| 0   | 20 | 2 | 847.52  | 489.32 | 77.26 o   |
| 1   | 20 | 2 | 477.35  | 257.54 | 40.06 o   |
| 2   | 20 | 2 | 118.76  | 42.92  | 20.03 <   |
| 3   | 20 | 2 | 3.48    | 5.72   | 20.03 <   |
| 4   | 20 | 2 | 3369.45 | 818.39 | 392.03 <  |
| 5   | 20 | 2 | 229.41  | 105.88 | 85.85 <   |
| 7   | 20 | 2 | 67.71   | 22.89  | 14.31 <   |
| 8   | 20 | 2 | 14.71   | 17.17  | 14.31 <   |
| 9   | 20 | 2 | 84.22   | 34.34  | 17.17 <   |
| 10  | 20 | 2 | 30.86   | 31.48  | 17.17 <   |
| -11 | 21 | 2 | 2.99    | -8.58  | 20.03 <   |
| -10 | 21 | 2 | 49.98   | 51.51  | 45.78 <   |
| -9  | 21 | 2 | 8.71    | 0.00   | 17.17 <   |
| -8  | 21 | 2 | 10.74   | 17.17  | 17.17 <   |
| -7  | 21 | 2 | 59.48   | 31.48  | 17.17 <   |
| -6  | 21 | 2 | 153.51  | 65.81  | 28.62 <   |
| -5  | 21 | 2 | 10.01   | 22.89  | 17.17 <   |
| -4  | 21 | 2 | 511.48  | -54.37 | 157.38 <  |
| -3  | 21 | 2 | 0.91    | 2.86   | 11.45 <   |
| -2  | 21 | 2 | 21.18   | 14.31  | 14.31 <   |
| -1  | 21 | 2 | 28.77   | 22.89  | 17.17 <   |
| 0   | 21 | 2 | 24.25   | 17.17  | 14.31 <   |
| 1   | 21 | 2 | 29.49   | 5.72   | 17.17 <   |
| 2   | 21 | 2 | 2.09    | 14.31  | 20.03 <   |
| 3   | 21 | 2 | 13.20   | 20.03  | 20.03 <   |
| 4   | 21 | 2 | 812.79  | 389.17 | 80.12 o   |
| 5   | 21 | 2 | 57.86   | 14.31  | 20.03 <   |
| 6   | 21 | 2 | 96.50   | 57.23  | 25.75 <   |
| 7   | 21 | 2 | 17.93   | 11.45  | 11.45 <   |

## paulkerrite.cif

|     |    |   |         |         |           |
|-----|----|---|---------|---------|-----------|
| 8   | 21 | 2 | 36.57   | 28.62   | 14.31 <   |
| 9   | 21 | 2 | 9.95    | 0.00    | 14.31 <   |
| 10  | 21 | 2 | 39.22   | 34.34   | 42.92 <   |
| -9  | 22 | 2 | 202.07  | 211.75  | 60.09 o   |
| -7  | 22 | 2 | 39.85   | 28.62   | 17.17 <   |
| -6  | 22 | 2 | 2170.05 | -97.29  | 5428.29 < |
| -5  | 22 | 2 | 0.71    | -5.72   | 20.03 <   |
| -1  | 22 | 2 | 56.12   | 28.62   | 14.31 <   |
| 0   | 22 | 2 | 37.68   | 11.45   | 14.31 <   |
| 1   | 22 | 2 | 45.49   | 34.34   | 91.57 <   |
| 3   | 22 | 2 | 261.27  | 140.21  | 28.62 o   |
| 5   | 22 | 2 | 9.74    | 17.17   | 17.17 <   |
| 6   | 22 | 2 | 2233.07 | 497.90  | 268.98 <  |
| 7   | 22 | 2 | 26.91   | 20.03   | 14.31 <   |
| 8   | 22 | 2 | 1479.65 | -14.31  | 3611.23 < |
| 9   | 22 | 2 | 250.83  | -2.86   | 329.07 <  |
| -10 | 23 | 2 | 0.45    | 11.45   | 22.89 <   |
| -9  | 23 | 2 | 35.29   | 0.00    | 25.75 <   |
| -8  | 23 | 2 | 182.30  | 220.34  | 57.23 o   |
| -7  | 23 | 2 | 19.93   | 14.31   | 11.45 <   |
| -6  | 23 | 2 | 92.60   | 42.92   | 14.31 <   |
| -5  | 23 | 2 | 11.63   | 17.17   | 11.45 <   |
| -4  | 23 | 2 | 103.57  | 54.37   | 25.75 <   |
| -3  | 23 | 2 | 213.34  | 8.58    | 31.48 <   |
| -2  | 23 | 2 | 13.27   | 14.31   | 20.03 <   |
| -1  | 23 | 2 | 143.32  | 51.51   | 20.03 <   |
| 0   | 23 | 2 | 20.62   | 42.92   | 17.17 <   |
| 1   | 23 | 2 | 57.26   | 60.09   | 54.37 <   |
| 2   | 23 | 2 | 8.12    | 25.75   | 22.89 <   |
| 3   | 23 | 2 | 82.92   | 131.63  | 25.75 o   |
| 4   | 23 | 2 | 49.17   | 54.37   | 20.03 <   |
| 5   | 23 | 2 | 72.60   | 37.20   | 20.03 <   |
| 6   | 23 | 2 | 61.29   | 40.06   | 17.17 <   |
| 7   | 23 | 2 | 7.15    | 2.86    | 11.45 <   |
| 8   | 23 | 2 | 152.49  | 217.48  | 68.68 o   |
| 9   | 23 | 2 | 20.64   | 14.31   | 25.75 <   |
| -9  | 24 | 2 | 14.76   | 0.00    | 22.89 <   |
| -8  | 24 | 2 | 12.08   | 2.86    | 22.89 <   |
| -7  | 24 | 2 | 12.93   | 5.72    | 20.03 <   |
| -6  | 24 | 2 | 11.93   | 14.31   | 11.45 <   |
| -5  | 24 | 2 | 74.00   | 186.00  | 48.65 o   |
| -4  | 24 | 2 | 56.84   | 28.62   | 11.45 <   |
| -3  | 24 | 2 | 452.83  | 137.35  | 434.95 <  |
| -2  | 24 | 2 | 127.50  | 80.12   | 25.75 o   |
| -1  | 24 | 2 | 0.31    | 2.86    | 17.17 <   |
| 0   | 24 | 2 | 1217.22 | 1530.91 | 148.80 o  |
| 1   | 24 | 2 | 1.20    | -2.86   | 20.03 <   |
| 2   | 24 | 2 | 40.13   | 25.75   | 412.06 <  |
| 3   | 24 | 2 | 647.75  | 423.50  | 74.40 o   |
| 4   | 24 | 2 | 86.91   | 34.34   | 25.75 <   |
| 5   | 24 | 2 | 177.30  | 37.20   | 28.62 <   |
| 6   | 24 | 2 | 46.01   | 28.62   | 17.17 <   |
| 7   | 24 | 2 | 6.72    | 8.58    | 14.31 <   |
| 8   | 24 | 2 | 1.44    | -2.86   | 20.03 <   |



## paulkerrite.cif

|     |    |   |          |          |           |
|-----|----|---|----------|----------|-----------|
| -8  | 25 | 2 | 29.77    | 2.86     | 20.03 <   |
| -7  | 25 | 2 | 90.39    | -14.31   | 22.89 <   |
| -6  | 25 | 2 | 17.11    | 11.45    | 20.03 <   |
| -5  | 25 | 2 | 8.30     | -2.86    | 11.45 <   |
| -4  | 25 | 2 | 17.54    | 20.03    | 11.45 <   |
| -3  | 25 | 2 | 21.83    | 11.45    | 11.45 <   |
| -1  | 25 | 2 | 19.57    | 11.45    | 17.17 <   |
| 0   | 25 | 2 | 0.01     | 0.00     | 14.31 <   |
| 1   | 25 | 2 | 0.92     | 8.58     | 22.89 <   |
| 2   | 25 | 2 | 249.22   | 268.98   | 34.34 o   |
| 3   | 25 | 2 | 3.72     | 11.45    | 17.17 <   |
| 4   | 25 | 2 | 48.43    | 51.51    | 20.03 <   |
| 5   | 25 | 2 | 0.08     | 0.00     | 17.17 <   |
| 6   | 25 | 2 | 84.24    | 82.98    | 42.92 <   |
| 7   | 25 | 2 | 67.06    | 62.95    | 28.62 <   |
| 8   | 25 | 2 | 30.13    | 0.00     | 22.89 <   |
| -6  | 26 | 2 | 442.77   | -37.20   | 28.62 <   |
| -5  | 26 | 2 | 47.87    | 14.31    | 22.89 <   |
| -4  | 26 | 2 | 375.17   | -14.31   | 1007.25 < |
| -3  | 26 | 2 | 195.63   | 114.46   | 31.48 o   |
| -2  | 26 | 2 | 1923.87  | 62.95    | 1447.92 < |
| -1  | 26 | 2 | 49.66    | 22.89    | 17.17 <   |
| 0   | 26 | 2 | 810.77   | 434.95   | 80.12 o   |
| 1   | 26 | 2 | 66.36    | 37.20    | 20.03 <   |
| 3   | 26 | 2 | 161.12   | 57.23    | 25.75 <   |
| 5   | 26 | 2 | 16.52    | 25.75    | 28.62 <   |
| 6   | 26 | 2 | 464.16   | 769.75   | 97.29 o   |
| 7   | 26 | 2 | 134.29   | 140.21   | 45.78 o   |
| -4  | 27 | 2 | 70.74    | 0.00     | 22.89 <   |
| -3  | 27 | 2 | 3.79     | -5.72    | 22.89 <   |
| -2  | 27 | 2 | 311.98   | -8.58    | 40.06 <   |
| -1  | 27 | 2 | 41.54    | 25.75    | 20.03 <   |
| 0   | 27 | 2 | 0.27     | -5.72    | 20.03 <   |
| 1   | 27 | 2 | 32.37    | 22.89    | 22.89 <   |
| 2   | 27 | 2 | 350.24   | 546.55   | 62.95 o   |
| 3   | 27 | 2 | 6.37     | 22.89    | 20.03 <   |
| 4   | 27 | 2 | 30.23    | 34.34    | 34.34 <   |
| 5   | 27 | 2 | 3.21     | 2.86     | 28.62 <   |
| 6   | 27 | 2 | 0.07     | 20.03    | 37.20 <   |
| 0   | 28 | 2 | 9.33     | 5.72     | 20.03 <   |
| 2   | 28 | 2 | 14.02    | -5.72    | 100.15 <  |
| 3   | 28 | 2 | 13.28    | 5.72     | 28.62 <   |
| 4   | 28 | 2 | 238.16   | 88.71    | 34.34 <   |
| -15 | 1  | 3 | 365.99   | 80.12    | 326.21 <  |
| -14 | 1  | 3 | 246.10   | -42.92   | 961.47 <  |
| -13 | 1  | 3 | 4.64     | 5.72     | 11.45 <   |
| -12 | 1  | 3 | 1.85     | 20.03    | 14.31 <   |
| -11 | 1  | 3 | 975.79   | 1130.30  | 68.68 o   |
| -10 | 1  | 3 | 593.14   | 681.04   | 54.37 o   |
| -9  | 1  | 3 | 240.61   | 271.84   | 28.62 o   |
| -8  | 1  | 3 | 20149.90 | 23598.90 | 806.95 o  |
| -7  | 1  | 3 | 6810.80  | 7222.46  | 254.68 o  |
| -6  | 1  | 3 | 499.87   | 552.27   | 31.48 o   |
| -5  | 1  | 3 | 25696.90 | 27550.60 | 932.85 o  |

## paulkerrite.cif

|     |   |   |          |          |         |   |
|-----|---|---|----------|----------|---------|---|
| -4  | 1 | 3 | 5038.25  | 6452.71  | 260.40  | o |
| 0   | 1 | 3 | 23.87    | 31.48    | 11.45   | < |
| 1   | 1 | 3 | 3531.25  | 4263.65  | 148.80  | o |
| 3   | 1 | 3 | 1494.21  | 1204.70  | 88.71   | o |
| 4   | 1 | 3 | 2960.02  | 3410.92  | 137.35  | o |
| 6   | 1 | 3 | 55.50    | 54.37    | 11.45   | o |
| 7   | 1 | 3 | 5561.03  | 4020.42  | 286.15  | o |
| 8   | 1 | 3 | 22173.20 | 17186.20 | 821.25  | o |
| 9   | 1 | 3 | 395.74   | 168.83   | 2086.04 | < |
| 10  | 1 | 3 | 478.48   | 520.79   | 48.65   | o |
| 11  | 1 | 3 | 862.77   | -17.17   | 40.06   | < |
| 12  | 1 | 3 | 11.57    | 5.72     | 14.31   | < |
| 13  | 1 | 3 | 0.59     | 0.00     | 11.45   | < |
| -15 | 2 | 3 | 0.36     | 2.86     | 14.31   | < |
| -14 | 2 | 3 | 104.13   | 22.89    | 20.03   | < |
| -13 | 2 | 3 | 6.78     | 14.31    | 11.45   | < |
| -12 | 2 | 3 | 75.74    | 40.06    | 314.77  | < |
| -11 | 2 | 3 | 260.50   | 243.23   | 31.48   | o |
| -10 | 2 | 3 | 310.60   | 360.55   | 34.34   | o |
| -9  | 2 | 3 | 106.86   | 197.44   | 22.89   | o |
| -8  | 2 | 3 | 617.74   | 683.90   | 37.20   | o |
| -7  | 2 | 3 | 24.09    | 100.15   | 17.17   | o |
| -6  | 2 | 3 | 0.06     | -2.86    | 14.31   | < |
| -5  | 2 | 3 | 547.74   | 575.16   | 31.48   | o |
| -4  | 2 | 3 | 19.94    | 82.98    | 22.89   | o |
| -3  | 2 | 3 | 197.99   | 277.57   | 22.89   | o |
| -2  | 2 | 3 | 8.72     | 20.03    | 17.17   | < |
| -1  | 2 | 3 | 390.56   | 512.21   | 25.75   | o |
| 0   | 2 | 3 | 1453.47  | 1216.14  | 48.65   | o |
| 1   | 2 | 3 | 725.40   | 735.41   | 28.62   | o |
| 2   | 2 | 3 | 58.76    | 97.29    | 11.45   | o |
| 4   | 2 | 3 | 132.92   | 91.57    | 22.89   | o |
| 5   | 2 | 3 | 59.36    | 28.62    | 8.58    | o |
| 6   | 2 | 3 | 11.32    | 22.89    | 8.58    | < |
| 7   | 2 | 3 | 79.57    | 31.48    | 11.45   | < |
| 8   | 2 | 3 | 322.58   | 186.00   | 51.51   | o |
| 9   | 2 | 3 | 46.05    | 68.68    | 17.17   | o |
| 10  | 2 | 3 | 68.12    | 31.48    | 17.17   | < |
| 11  | 2 | 3 | 579.44   | 406.33   | 85.85   | o |
| 12  | 2 | 3 | 74.68    | 11.45    | 17.17   | < |
| 13  | 2 | 3 | 10.54    | 0.00     | 11.45   | < |
| -15 | 3 | 3 | 22.04    | 2.86     | 14.31   | < |
| -14 | 3 | 3 | 1296.60  | 1087.37  | 251.81  | o |
| -13 | 3 | 3 | 1.43     | 2.86     | 14.31   | < |
| -12 | 3 | 3 | 2.67     | 20.03    | 14.31   | < |
| -11 | 3 | 3 | 3289.99  | 4295.13  | 168.83  | o |
| -10 | 3 | 3 | 300.62   | 432.09   | 34.34   | o |
| -9  | 3 | 3 | 2287.53  | 2406.53  | 88.71   | o |
| -8  | 3 | 3 | 308.45   | 389.17   | 25.75   | o |
| -7  | 3 | 3 | 256.87   | 337.66   | 25.75   | o |
| -6  | 3 | 3 | 1014.45  | 995.81   | 42.92   | o |
| -3  | 3 | 3 | 18331.00 | 23647.50 | 924.27  | o |
| 0   | 3 | 3 | 27.83    | 22.89    | 8.58    | < |
| 1   | 3 | 3 | 7821.28  | 8052.29  | 251.81  | o |

## paulkerrite.cif

|     |   |   |          |          |         |   |
|-----|---|---|----------|----------|---------|---|
| 2   | 3 | 3 | 10396.50 | 8721.89  | 343.38  | o |
| 3   | 3 | 3 | 28900.20 | 23109.60 | 1104.54 | o |
| 4   | 3 | 3 | 175.67   | 174.55   | 37.20   | o |
| 5   | 3 | 3 | 1094.37  | 1024.42  | 37.20   | o |
| 7   | 3 | 3 | 26.23    | 37.20    | 11.45   | o |
| 8   | 3 | 3 | 604.18   | 489.32   | 25.75   | o |
| 9   | 3 | 3 | 1943.36  | 1997.34  | 145.94  | o |
| 10  | 3 | 3 | 516.25   | 417.78   | 91.57   | o |
| 11  | 3 | 3 | 2796.42  | 2961.66  | 160.24  | o |
| 12  | 3 | 3 | 4.28     | 5.72     | 11.45   | < |
| 13  | 3 | 3 | 21.31    | 5.72     | 14.31   | < |
| -15 | 4 | 3 | 3.05     | -5.72    | 14.31   | < |
| -14 | 4 | 3 | 36.79    | 2.86     | 17.17   | < |
| -13 | 4 | 3 | 34.78    | 25.75    | 20.03   | < |
| -12 | 4 | 3 | 6.89     | 14.31    | 14.31   | < |
| -11 | 4 | 3 | 43.07    | 40.06    | 17.17   | < |
| -10 | 4 | 3 | 94.91    | 57.23    | 17.17   | o |
| -9  | 4 | 3 | 37.56    | 40.06    | 14.31   | < |
| -8  | 4 | 3 | 51.12    | 62.95    | 14.31   | o |
| -7  | 4 | 3 | 457.97   | 557.99   | 31.48   | o |
| -6  | 4 | 3 | 336.29   | 349.10   | 22.89   | o |
| -5  | 4 | 3 | 0.79     | 2.86     | 11.45   | < |
| -4  | 4 | 3 | 606.48   | 732.55   | 37.20   | o |
| -3  | 4 | 3 | 6.34     | -14.31   | 14.31   | < |
| -2  | 4 | 3 | 297.90   | 372.00   | 22.89   | o |
| -1  | 4 | 3 | 8.48     | 14.31    | 8.58    | < |
| 0   | 4 | 3 | 11.11    | 2.86     | 8.58    | < |
| 1   | 4 | 3 | 5.32     | 2.86     | 8.58    | < |
| 2   | 4 | 3 | 458.53   | 369.14   | 20.03   | o |
| 3   | 4 | 3 | 3.88     | -2.86    | 5.72    | < |
| 4   | 4 | 3 | 710.17   | 669.59   | 34.34   | o |
| 5   | 4 | 3 | 24.22    | 0.00     | 5.72    | < |
| 6   | 4 | 3 | 12.94    | 20.03    | 8.58    | < |
| 7   | 4 | 3 | 74.66    | 31.48    | 11.45   | < |
| 8   | 4 | 3 | 125.91   | 100.15   | 11.45   | o |
| 9   | 4 | 3 | 101.73   | 60.09    | 11.45   | o |
| 10  | 4 | 3 | 115.09   | 57.23    | 11.45   | o |
| 11  | 4 | 3 | 0.74     | -11.45   | 11.45   | < |
| 12  | 4 | 3 | 5.77     | 8.58     | 11.45   | < |
| 13  | 4 | 3 | 69.44    | 0.00     | 17.17   | < |
| -15 | 5 | 3 | 8.91     | 5.72     | 14.31   | < |
| -14 | 5 | 3 | 707.16   | 414.92   | 243.23  | < |
| -13 | 5 | 3 | 934.16   | 832.70   | 131.63  | o |
| -12 | 5 | 3 | 121.17   | 174.55   | 25.75   | o |
| -11 | 5 | 3 | 2400.91  | 2409.39  | 105.88  | o |
| -10 | 5 | 3 | 1502.72  | 1937.24  | 97.29   | o |
| -9  | 5 | 3 | 973.35   | 1015.84  | 54.37   | o |
| -8  | 5 | 3 | 163.74   | 206.03   | 22.89   | o |
| -7  | 5 | 3 | 313.68   | 297.60   | 22.89   | o |
| -5  | 5 | 3 | 304.26   | 251.81   | 22.89   | o |
| -4  | 5 | 3 | 7414.73  | 7843.40  | 246.09  | o |
| -3  | 5 | 3 | 1751.91  | 1808.48  | 97.29   | o |
| 0   | 5 | 3 | 20.39    | -20.03   | 8.58    | < |
| 1   | 5 | 3 | 38353.80 | 32275.00 | 972.91  | o |

## paulkerrite.cif

|     |   |   |          |          |          |
|-----|---|---|----------|----------|----------|
| 3   | 5 | 3 | 1336.39  | 1356.36  | 62.95 o  |
| 6   | 5 | 3 | 288.76   | 257.54   | 20.03 o  |
| 7   | 5 | 3 | 325.89   | 311.90   | 25.75 o  |
| 8   | 5 | 3 | 535.76   | 414.92   | 28.62 o  |
| 9   | 5 | 3 | 1019.61  | 898.52   | 54.37 o  |
| 10  | 5 | 3 | 2443.53  | 2543.88  | 137.35 o |
| 11  | 5 | 3 | 2301.03  | 1765.55  | 137.35 o |
| 12  | 5 | 3 | 223.76   | 203.17   | 40.06 o  |
| 13  | 5 | 3 | 939.85   | 143.08   | 226.06 < |
| -14 | 6 | 3 | 89.42    | 37.20    | 17.17 <  |
| -13 | 6 | 3 | 35.50    | 40.06    | 20.03 <  |
| -12 | 6 | 3 | 16.70    | 17.17    | 17.17 <  |
| -11 | 6 | 3 | 0.62     | 0.00     | 14.31 <  |
| -10 | 6 | 3 | 12.62    | 5.72     | 14.31 <  |
| -9  | 6 | 3 | 2.75     | 2.86     | 17.17 <  |
| -8  | 6 | 3 | 189.47   | 214.61   | 20.03 o  |
| -7  | 6 | 3 | 14.68    | 14.31    | 11.45 <  |
| -6  | 6 | 3 | 0.88     | -5.72    | 11.45 <  |
| -5  | 6 | 3 | 253.15   | 303.32   | 25.75 o  |
| -3  | 6 | 3 | 20.47    | 37.20    | 14.31 <  |
| -2  | 6 | 3 | 9.79     | 31.48    | 8.58 o   |
| -1  | 6 | 3 | 140.82   | 94.43    | 11.45 o  |
| 0   | 6 | 3 | 134.65   | 88.71    | 14.31 o  |
| 1   | 6 | 3 | 87.31    | 42.92    | 8.58 o   |
| 2   | 6 | 3 | 151.99   | 91.57    | 11.45 o  |
| 3   | 6 | 3 | 206.43   | 128.77   | 14.31 o  |
| 4   | 6 | 3 | 101.38   | 85.85    | 14.31 o  |
| 5   | 6 | 3 | 1.20     | 28.62    | 11.45 <  |
| 6   | 6 | 3 | 15.48    | 8.58     | 8.58 <   |
| 7   | 6 | 3 | 110.28   | 54.37    | 11.45 o  |
| 8   | 6 | 3 | 72.55    | 60.09    | 14.31 o  |
| 9   | 6 | 3 | 49.43    | 37.20    | 11.45 o  |
| 10  | 6 | 3 | 32.85    | 62.95    | 14.31 o  |
| 11  | 6 | 3 | 67.50    | 25.75    | 14.31 <  |
| 12  | 6 | 3 | 3.66     | 5.72     | 11.45 <  |
| 13  | 6 | 3 | 1.05     | 0.00     | 11.45 <  |
| -14 | 7 | 3 | 10.22    | 22.89    | 20.03 <  |
| -13 | 7 | 3 | 467.10   | 274.70   | 94.43 <  |
| -12 | 7 | 3 | 30.67    | 54.37    | 17.17 o  |
| -11 | 7 | 3 | 1150.31  | 1267.65  | 62.95 o  |
| -10 | 7 | 3 | 2053.97  | 2618.28  | 108.74 o |
| -9  | 7 | 3 | 2102.39  | 2272.04  | 94.43 o  |
| -8  | 7 | 3 | 521.28   | 672.46   | 40.06 o  |
| -7  | 7 | 3 | 260.76   | 351.97   | 28.62 o  |
| -6  | 7 | 3 | 654.73   | 829.84   | 40.06 o  |
| -5  | 7 | 3 | 338.09   | 469.29   | 28.62 o  |
| -4  | 7 | 3 | 14811.60 | 12095.60 | 655.29 o |
| -3  | 7 | 3 | 9382.71  | 8618.87  | 271.84 o |
| -2  | 7 | 3 | 2252.62  | 2744.19  | 123.04 o |
| -1  | 7 | 3 | 2439.39  | 2621.14  | 91.57 o  |
| 0   | 7 | 3 | 48.78    | 80.12    | 14.31 o  |
| 2   | 7 | 3 | 1533.44  | 1270.51  | 65.81 o  |
| 8   | 7 | 3 | 88.82    | 77.26    | 17.17 o  |
| 9   | 7 | 3 | 2157.26  | 1834.23  | 105.88 o |

## paulkerrite.cif

|     |    |   |          |          |          |
|-----|----|---|----------|----------|----------|
| 10  | 7  | 3 | 2630.84  | 2830.03  | 154.52 o |
| 11  | 7  | 3 | 1164.99  | 457.84   | 414.92 < |
| 12  | 7  | 3 | 18.70    | 45.78    | 20.03 <  |
| -14 | 8  | 3 | 31.71    | 0.00     | 14.31 <  |
| -13 | 8  | 3 | 37.63    | 8.58     | 14.31 <  |
| -12 | 8  | 3 | 377.71   | 457.84   | 42.92 o  |
| -11 | 8  | 3 | 74.09    | 97.29    | 25.75 o  |
| -10 | 8  | 3 | 160.80   | 140.21   | 22.89 o  |
| -9  | 8  | 3 | 65.96    | 48.65    | 20.03 <  |
| -8  | 8  | 3 | 85.45    | 54.37    | 85.85 <  |
| -7  | 8  | 3 | 139.38   | 177.41   | 20.03 o  |
| -6  | 8  | 3 | 91.39    | 151.66   | 105.88 < |
| -5  | 8  | 3 | 7.86     | 22.89    | 11.45 <  |
| -4  | 8  | 3 | 1.08     | -2.86    | 11.45 <  |
| -3  | 8  | 3 | 776.48   | 623.81   | 34.34 o  |
| -1  | 8  | 3 | 0.58     | 28.62    | 11.45 <  |
| 0   | 8  | 3 | 936.33   | 904.24   | 51.51 o  |
| 1   | 8  | 3 | 82.07    | 71.54    | 14.31 o  |
| 4   | 8  | 3 | 10.86    | 2.86     | 8.58 <   |
| 5   | 8  | 3 | 15.03    | 8.58     | 51.51 <  |
| 6   | 8  | 3 | 401.70   | 111.60   | 42.92 <  |
| 7   | 8  | 3 | 9.66     | 28.62    | 11.45 <  |
| 8   | 8  | 3 | 1.50     | 2.86     | 14.31 <  |
| 9   | 8  | 3 | 382.39   | 206.03   | 45.78 o  |
| 10  | 8  | 3 | 122.66   | 74.40    | 17.17 o  |
| 11  | 8  | 3 | 0.19     | 14.31    | 17.17 <  |
| 12  | 8  | 3 | 145.65   | 60.09    | 91.57 <  |
| 13  | 8  | 3 | 107.98   | 54.37    | 25.75 <  |
| -14 | 9  | 3 | 13.40    | 20.03    | 22.89 <  |
| -13 | 9  | 3 | 5.09     | 0.00     | 14.31 <  |
| -12 | 9  | 3 | 278.72   | 294.74   | 31.48 o  |
| -11 | 9  | 3 | 178.66   | 194.58   | 37.20 o  |
| -10 | 9  | 3 | 13.88    | 51.51    | 68.68 <  |
| -9  | 9  | 3 | 633.58   | 495.04   | 65.81 o  |
| -8  | 9  | 3 | 135.60   | 226.06   | 25.75 o  |
| -7  | 9  | 3 | 1069.99  | 1256.20  | 60.09 o  |
| -6  | 9  | 3 | 568.87   | 658.15   | 37.20 o  |
| -5  | 9  | 3 | 1207.59  | 1035.87  | 48.65 o  |
| -4  | 9  | 3 | 17341.90 | 14198.80 | 598.06 o |
| -3  | 9  | 3 | 3651.51  | 3459.57  | 131.63 o |
| -2  | 9  | 3 | 649.26   | 512.21   | 37.20 o  |
| -1  | 9  | 3 | 45.69    | 91.57    | 17.17 o  |
| 0   | 9  | 3 | 29.11    | 20.03    | 11.45 <  |
| 1   | 9  | 3 | 34.33    | 37.20    | 11.45 o  |
| 2   | 9  | 3 | 218.40   | 123.04   | 20.03 o  |
| 8   | 9  | 3 | 214.40   | 5.72     | 220.34 < |
| 9   | 9  | 3 | 636.99   | 140.21   | 575.16 < |
| 10  | 9  | 3 | 27.71    | 31.48    | 20.03 <  |
| 11  | 9  | 3 | 235.65   | 163.11   | 25.75 o  |
| 12  | 9  | 3 | 284.77   | 97.29    | 31.48 o  |
| 13  | 9  | 3 | 5.95     | 5.72     | 25.75 <  |
| -14 | 10 | 3 | 35.16    | -2.86    | 22.89 <  |
| -13 | 10 | 3 | 0.34     | -5.72    | 17.17 <  |
| -12 | 10 | 3 | 70.14    | 28.62    | 22.89 <  |

## paulkerrite.cif

|     |    |   |          |          |           |
|-----|----|---|----------|----------|-----------|
| -11 | 10 | 3 | 82.28    | 71.54    | 45.78 <   |
| -10 | 10 | 3 | 107.53   | 154.52   | 22.89 o   |
| -9  | 10 | 3 | 44.01    | 28.62    | 14.31 <   |
| -8  | 10 | 3 | 282.48   | 223.20   | 108.74 <  |
| -7  | 10 | 3 | 4.63     | 31.48    | 14.31 <   |
| -6  | 10 | 3 | 706.62   | 732.55   | 40.06 o   |
| -5  | 10 | 3 | 12.01    | 17.17    | 11.45 <   |
| -4  | 10 | 3 | 795.41   | 918.54   | 68.68 o   |
| -3  | 10 | 3 | 6.40     | 5.72     | 8.58 <    |
| -2  | 10 | 3 | 19.98    | 28.62    | 14.31 <   |
| -1  | 10 | 3 | 17.05    | 20.03    | 11.45 <   |
| 0   | 10 | 3 | 216.93   | 354.83   | 28.62 o   |
| 1   | 10 | 3 | 0.35     | 11.45    | 11.45 <   |
| 2   | 10 | 3 | 16.32    | 8.58     | 11.45 <   |
| 3   | 10 | 3 | 4.12     | 22.89    | 14.31 <   |
| 4   | 10 | 3 | 744.06   | 460.70   | 57.23 o   |
| 5   | 10 | 3 | 36.56    | 8.58     | 8.58 <    |
| 6   | 10 | 3 | 326.03   | 105.88   | 970.05 <  |
| 7   | 10 | 3 | 15.82    | 17.17    | 11.45 <   |
| 8   | 10 | 3 | 379.33   | 14.31    | 194.58 <  |
| 9   | 10 | 3 | 60.69    | 22.89    | 17.17 <   |
| 10  | 10 | 3 | 54.29    | 40.06    | 17.17 <   |
| 11  | 10 | 3 | 9.64     | 20.03    | 17.17 <   |
| 12  | 10 | 3 | 42.47    | 17.17    | 34.34 <   |
| 13  | 10 | 3 | 3.93     | 5.72     | 22.89 <   |
| -14 | 11 | 3 | 2.44     | -8.58    | 28.62 <   |
| -13 | 11 | 3 | 13.06    | -2.86    | 22.89 <   |
| -12 | 11 | 3 | 599.59   | 280.43   | 646.70 <  |
| -11 | 11 | 3 | 471.59   | 492.18   | 45.78 o   |
| -10 | 11 | 3 | 278.54   | 108.74   | 174.55 <  |
| -9  | 11 | 3 | 42.79    | 40.06    | 14.31 <   |
| -8  | 11 | 3 | 4563.35  | 7371.25  | 526.52 o  |
| -7  | 11 | 3 | 8578.86  | 10370.10 | 417.78 o  |
| -6  | 11 | 3 | 1082.22  | 1178.94  | 80.12 o   |
| -5  | 11 | 3 | 10114.90 | 9926.58  | 495.04 o  |
| -3  | 11 | 3 | 373.36   | 254.68   | 31.48 o   |
| -2  | 11 | 3 | 149.38   | 134.49   | 14.31 o   |
| -1  | 11 | 3 | 2505.31  | 3030.34  | 237.51 o  |
| 0   | 11 | 3 | 43.24    | 40.06    | 14.31 <   |
| 8   | 11 | 3 | 6053.39  | 852.73   | 3722.83 < |
| 9   | 11 | 3 | 111.52   | 60.09    | 460.70 <  |
| 10  | 11 | 3 | 365.19   | 62.95    | 260.40 <  |
| 11  | 11 | 3 | 406.56   | 123.04   | 1164.64 < |
| 12  | 11 | 3 | 630.40   | -28.62   | 397.75 <  |
| 13  | 11 | 3 | 0.21     | 8.58     | 22.89 <   |
| -14 | 12 | 3 | 4.83     | -20.03   | 48.65 <   |
| -13 | 12 | 3 | 47.62    | 5.72     | 20.03 <   |
| -12 | 12 | 3 | 107.01   | 51.51    | 22.89 <   |
| -11 | 12 | 3 | 52.95    | 54.37    | 22.89 <   |
| -10 | 12 | 3 | 269.01   | 128.77   | 443.53 <  |
| -9  | 12 | 3 | 7.29     | 20.03    | 17.17 <   |
| -8  | 12 | 3 | 2.74     | 22.89    | 17.17 <   |
| -6  | 12 | 3 | 517.95   | 457.84   | 48.65 o   |
| -5  | 12 | 3 | 54.75    | 77.26    | 14.31 o   |

## paulkerrite.cif

|     |    |   |         |         |           |
|-----|----|---|---------|---------|-----------|
| -4  | 12 | 3 | 19.92   | 17.17   | 11.45 <   |
| -2  | 12 | 3 | 72.45   | 45.78   | 17.17 <   |
| -1  | 12 | 3 | 33.47   | 25.75   | 11.45 <   |
| 0   | 12 | 3 | 1825.83 | 1782.72 | 105.88 o  |
| 1   | 12 | 3 | 7.27    | 2.86    | 14.31 <   |
| 2   | 12 | 3 | 244.40  | 71.54   | 114.46 <  |
| 3   | 12 | 3 | 596.70  | 632.39  | 45.78 o   |
| 4   | 12 | 3 | 24.98   | 11.45   | 11.45 <   |
| 6   | 12 | 3 | 304.53  | 94.43   | 31.48 <   |
| 7   | 12 | 3 | 293.03  | 200.31  | 42.92 o   |
| 8   | 12 | 3 | 34.38   | 17.17   | 14.31 <   |
| 9   | 12 | 3 | 45.08   | 31.48   | 17.17 <   |
| 10  | 12 | 3 | 178.24  | 134.49  | 297.60 <  |
| 11  | 12 | 3 | 0.06    | 17.17   | 20.03 <   |
| 12  | 12 | 3 | 21.78   | -5.72   | 20.03 <   |
| 13  | 12 | 3 | 107.69  | 97.29   | 42.92 <   |
| -13 | 13 | 3 | 11.50   | 2.86    | 20.03 <   |
| -12 | 13 | 3 | 124.46  | 48.65   | 22.89 <   |
| -11 | 13 | 3 | 45.53   | 42.92   | 20.03 <   |
| -10 | 13 | 3 | 906.15  | 592.33  | 94.43 o   |
| -9  | 13 | 3 | 788.83  | 449.26  | 217.48 <  |
| -8  | 13 | 3 | 4342.45 | 4246.48 | 231.78 o  |
| -7  | 13 | 3 | 38.62   | 8.58    | 17.17 <   |
| -6  | 13 | 3 | 102.28  | 131.63  | 22.89 o   |
| -5  | 13 | 3 | 4121.09 | 4049.04 | 183.14 o  |
| -2  | 13 | 3 | 691.04  | 832.70  | 62.95 o   |
| -1  | 13 | 3 | 156.24  | 151.66  | 20.03 o   |
| 0   | 13 | 3 | 106.42  | 31.48   | 14.31 <   |
| 1   | 13 | 3 | 47.81   | 40.06   | 14.31 <   |
| 4   | 13 | 3 | 1817.37 | 1837.09 | 148.80 o  |
| 6   | 13 | 3 | 18.10   | 40.06   | 14.31 <   |
| 7   | 13 | 3 | 25.39   | 8.58    | 14.31 <   |
| 8   | 13 | 3 | 3561.15 | 3719.97 | 280.43 o  |
| 9   | 13 | 3 | 1297.37 | 25.75   | 2993.14 < |
| 10  | 13 | 3 | 937.80  | 114.46  | 1101.68 < |
| 11  | 13 | 3 | 29.82   | 20.03   | 17.17 <   |
| 12  | 13 | 3 | 193.07  | 62.95   | 25.75 <   |
| 13  | 13 | 3 | 0.31    | 0.00    | 31.48 <   |
| -13 | 14 | 3 | 19.36   | 14.31   | 25.75 <   |
| -12 | 14 | 3 | 30.01   | 11.45   | 25.75 <   |
| -11 | 14 | 3 | 27.36   | 5.72    | 60.09 <   |
| -10 | 14 | 3 | 83.70   | 62.95   | 22.89 <   |
| -9  | 14 | 3 | 29.27   | 40.06   | 17.17 <   |
| -8  | 14 | 3 | 171.37  | 134.49  | 37.20 o   |
| -7  | 14 | 3 | 29.80   | 8.58    | 17.17 <   |
| -6  | 14 | 3 | 59.71   | 8.58    | 22.89 <   |
| -5  | 14 | 3 | 114.52  | 82.98   | 17.17 o   |
| -4  | 14 | 3 | 29.89   | 65.81   | 17.17 o   |
| -3  | 14 | 3 | 2.53    | 14.31   | 11.45 <   |
| -2  | 14 | 3 | 216.47  | 203.17  | 28.62 o   |
| -1  | 14 | 3 | 3.11    | 17.17   | 11.45 <   |
| 0   | 14 | 3 | 180.75  | 60.09   | 17.17 o   |
| 1   | 14 | 3 | 18.92   | 17.17   | 11.45 <   |
| 2   | 14 | 3 | 281.08  | 88.71   | 123.04 <  |

## paulkerrite.cif

|     |    |   |          |          |         |   |
|-----|----|---|----------|----------|---------|---|
| 3   | 14 | 3 | 6.81     | 2.86     | 11.45   | < |
| 4   | 14 | 3 | 164.01   | 103.01   | 20.03   | o |
| 5   | 14 | 3 | 64.05    | 34.34    | 11.45   | o |
| 6   | 14 | 3 | 8.11     | 5.72     | 11.45   | < |
| 7   | 14 | 3 | 19.76    | 0.00     | 11.45   | < |
| 8   | 14 | 3 | 192.78   | 34.34    | 343.38  | < |
| 9   | 14 | 3 | 27.47    | 20.03    | 14.31   | < |
| 10  | 14 | 3 | 15.20    | 28.62    | 20.03   | < |
| 11  | 14 | 3 | 71.49    | 31.48    | 20.03   | < |
| 12  | 14 | 3 | 19.29    | 51.51    | 40.06   | < |
| 13  | 14 | 3 | 7.97     | -5.72    | 22.89   | < |
| -13 | 15 | 3 | 300.15   | -77.26   | 40.06   | < |
| -12 | 15 | 3 | 283.35   | 62.95    | 31.48   | < |
| -11 | 15 | 3 | 1328.20  | 228.92   | 108.74  | < |
| -10 | 15 | 3 | 1342.26  | 417.78   | 114.46  | o |
| -8  | 15 | 3 | 238.21   | 165.97   | 34.34   | o |
| -7  | 15 | 3 | 158.51   | 148.80   | 31.48   | o |
| -6  | 15 | 3 | 1073.31  | 958.61   | 62.95   | o |
| -3  | 15 | 3 | 600.32   | 394.89   | 45.78   | o |
| -2  | 15 | 3 | 11453.60 | 10104.00 | 500.77  | o |
| 0   | 15 | 3 | 7.88     | 17.17    | 17.17   | < |
| 8   | 15 | 3 | 103.25   | 42.92    | 17.17   | < |
| 9   | 15 | 3 | 1265.23  | -8.58    | 2844.34 | < |
| 10  | 15 | 3 | 1903.77  | -100.15  | 9726.28 | < |
| 11  | 15 | 3 | 1219.95  | 929.99   | 400.61  | < |
| 12  | 15 | 3 | 265.40   | 60.09    | 34.34   | < |
| 13  | 15 | 3 | 245.93   | 40.06    | 31.48   | < |
| -13 | 16 | 3 | 29.93    | -17.17   | 28.62   | < |
| -12 | 16 | 3 | 58.78    | -14.31   | 25.75   | < |
| -11 | 16 | 3 | 0.10     | -2.86    | 17.17   | < |
| -10 | 16 | 3 | 26.73    | 8.58     | 17.17   | < |
| -9  | 16 | 3 | 161.35   | 123.04   | 31.48   | o |
| -8  | 16 | 3 | 345.27   | 120.18   | 148.80  | < |
| -7  | 16 | 3 | 54.05    | 74.40    | 20.03   | o |
| -6  | 16 | 3 | 741.40   | 804.09   | 65.81   | o |
| -5  | 16 | 3 | 5.16     | 54.37    | 17.17   | o |
| -3  | 16 | 3 | 289.31   | 194.58   | 31.48   | o |
| -2  | 16 | 3 | 16.60    | 8.58     | 11.45   | < |
| -1  | 16 | 3 | 10.98    | 8.58     | 25.75   | < |
| 0   | 16 | 3 | 185.59   | 42.92    | 22.89   | < |
| 1   | 16 | 3 | 1.33     | 8.58     | 11.45   | < |
| 2   | 16 | 3 | 1.53     | 2.86     | 17.17   | < |
| 3   | 16 | 3 | 169.62   | 80.12    | 22.89   | o |
| 4   | 16 | 3 | 371.58   | 183.14   | 37.20   | o |
| 5   | 16 | 3 | 87.39    | 25.75    | 14.31   | < |
| 7   | 16 | 3 | 160.58   | 22.89    | 995.81  | < |
| 8   | 16 | 3 | 124.11   | 71.54    | 20.03   | o |
| 9   | 16 | 3 | 5.95     | 28.62    | 17.17   | < |
| 10  | 16 | 3 | 17.60    | 34.34    | 22.89   | < |
| 11  | 16 | 3 | 28.94    | 5.72     | 60.09   | < |
| 12  | 16 | 3 | 31.25    | 8.58     | 25.75   | < |
| 13  | 16 | 3 | 55.36    | 11.45    | 25.75   | < |
| -12 | 17 | 3 | 10.76    | -17.17   | 28.62   | < |
| -10 | 17 | 3 | 399.88   | 71.54    | 389.17  | < |



## paulkerrite.cif

|     |    |   |         |         |           |
|-----|----|---|---------|---------|-----------|
| -9  | 17 | 3 | 262.46  | 148.80  | 54.37 <   |
| -8  | 17 | 3 | 80.14   | 74.40   | 22.89 o   |
| -7  | 17 | 3 | 1.73    | 20.03   | 17.17 <   |
| -6  | 17 | 3 | 151.12  | 42.92   | 20.03 <   |
| -5  | 17 | 3 | 3.34    | 48.65   | 20.03 <   |
| -4  | 17 | 3 | 257.30  | 114.46  | 20.03 o   |
| -3  | 17 | 3 | 1321.40 | 1001.53 | 114.46 o  |
| 0   | 17 | 3 | 50.31   | 2.86    | 48.65 <   |
| 1   | 17 | 3 | 3373.05 | 2609.70 | 128.77 o  |
| 5   | 17 | 3 | 173.03  | 25.75   | 17.17 <   |
| 6   | 17 | 3 | 12.99   | 17.17   | 14.31 <   |
| 7   | 17 | 3 | 68.54   | 22.89   | 14.31 <   |
| 8   | 17 | 3 | 166.63  | 25.75   | 20.03 <   |
| 9   | 17 | 3 | 236.90  | 42.92   | 22.89 <   |
| 10  | 17 | 3 | 575.63  | 94.43   | 1027.28 < |
| 12  | 17 | 3 | 15.49   | 17.17   | 25.75 <   |
| -12 | 18 | 3 | 2.26    | -2.86   | 25.75 <   |
| -11 | 18 | 3 | 1.49    | -5.72   | 28.62 <   |
| -10 | 18 | 3 | 3.42    | 11.45   | 17.17 <   |
| -9  | 18 | 3 | 15.75   | 5.72    | 20.03 <   |
| -8  | 18 | 3 | 248.64  | 85.85   | 28.62 <   |
| -7  | 18 | 3 | 0.10    | -2.86   | 14.31 <   |
| -6  | 18 | 3 | 126.74  | 74.40   | 22.89 o   |
| -5  | 18 | 3 | 26.34   | 25.75   | 11.45 <   |
| -4  | 18 | 3 | 29.22   | 17.17   | 11.45 <   |
| -3  | 18 | 3 | 16.93   | 17.17   | 11.45 <   |
| -2  | 18 | 3 | 399.68  | 612.36  | 74.40 o   |
| -1  | 18 | 3 | 276.05  | 17.17   | 54.37 <   |
| 0   | 18 | 3 | 366.38  | 266.12  | 54.37 o   |
| 1   | 18 | 3 | 251.42  | 194.58  | 34.34 o   |
| 2   | 18 | 3 | 357.73  | 340.52  | 62.95 o   |
| 3   | 18 | 3 | 57.10   | 22.89   | 20.03 <   |
| 4   | 18 | 3 | 0.50    | 5.72    | 17.17 <   |
| 5   | 18 | 3 | 14.85   | 20.03   | 31.48 <   |
| 6   | 18 | 3 | 195.07  | 74.40   | 1244.76 < |
| 7   | 18 | 3 | 8.05    | 2.86    | 11.45 <   |
| 8   | 18 | 3 | 145.23  | -8.58   | 94.43 <   |
| 9   | 18 | 3 | 5.55    | 11.45   | 14.31 <   |
| 10  | 18 | 3 | 46.38   | -5.72   | 120.18 <  |
| 11  | 18 | 3 | 22.43   | 14.31   | 25.75 <   |
| 12  | 18 | 3 | 1.25    | -5.72   | 37.20 <   |
| -12 | 19 | 3 | 88.83   | 8.58    | 25.75 <   |
| -11 | 19 | 3 | 46.56   | -2.86   | 22.89 <   |
| -10 | 19 | 3 | 115.48  | 85.85   | 22.89 o   |
| -9  | 19 | 3 | 193.05  | 160.24  | 28.62 o   |
| -8  | 19 | 3 | 543.31  | -2.86   | 289.01 <  |
| -7  | 19 | 3 | 139.42  | 74.40   | 20.03 o   |
| -6  | 19 | 3 | 7.52    | 17.17   | 11.45 <   |
| -2  | 19 | 3 | 137.23  | 42.92   | 14.31 <   |
| -1  | 19 | 3 | 98.27   | 11.45   | 17.17 <   |
| 0   | 19 | 3 | 0.47    | 2.86    | 14.31 <   |
| 1   | 19 | 3 | 13.01   | 11.45   | 14.31 <   |
| 2   | 19 | 3 | 115.53  | 20.03   | 22.89 <   |
| 3   | 19 | 3 | 1607.06 | 2.86    | 88.71 <   |

## paulkerrite.cif

|     |    |   |         |         |           |
|-----|----|---|---------|---------|-----------|
| 6   | 19 | 3 | 0.56    | 17.17   | 14.31 <   |
| 7   | 19 | 3 | 44.30   | 11.45   | 14.31 <   |
| 8   | 19 | 3 | 464.31  | 2.86    | 589.47 <  |
| 9   | 19 | 3 | 173.02  | 25.75   | 74.40 <   |
| 10  | 19 | 3 | 106.01  | 54.37   | 17.17 o   |
| 11  | 19 | 3 | 28.07   | 11.45   | 22.89 <   |
| -11 | 20 | 3 | 15.29   | 2.86    | 22.89 <   |
| -10 | 20 | 3 | 26.88   | 2.86    | 22.89 <   |
| -9  | 20 | 3 | 40.30   | 28.62   | 17.17 <   |
| -8  | 20 | 3 | 5.82    | 2.86    | 14.31 <   |
| -7  | 20 | 3 | 2.31    | 8.58    | 14.31 <   |
| -5  | 20 | 3 | 3.75    | 8.58    | 11.45 <   |
| -4  | 20 | 3 | 0.22    | 8.58    | 11.45 <   |
| -3  | 20 | 3 | 3.05    | 5.72    | 11.45 <   |
| -2  | 20 | 3 | 75.24   | 42.92   | 17.17 <   |
| -1  | 20 | 3 | 13.37   | 14.31   | 17.17 <   |
| 0   | 20 | 3 | 79.99   | 77.26   | 22.89 o   |
| 1   | 20 | 3 | 4.32    | 2.86    | 14.31 <   |
| 2   | 20 | 3 | 114.21  | 82.98   | 20.03 o   |
| 3   | 20 | 3 | 0.55    | 2.86    | 20.03 <   |
| 4   | 20 | 3 | 71.51   | 22.89   | 22.89 <   |
| 5   | 20 | 3 | 9.19    | 14.31   | 34.34 <   |
| 6   | 20 | 3 | 195.65  | 134.49  | 31.48 o   |
| 7   | 20 | 3 | 26.85   | 25.75   | 14.31 <   |
| 8   | 20 | 3 | 7.73    | 2.86    | 14.31 <   |
| 9   | 20 | 3 | 29.83   | 14.31   | 25.75 <   |
| 10  | 20 | 3 | 8.90    | 2.86    | 17.17 <   |
| -10 | 21 | 3 | 62.21   | 20.03   | 25.75 <   |
| -9  | 21 | 3 | 75.20   | 31.48   | 25.75 <   |
| -8  | 21 | 3 | 979.40  | -42.92  | 1250.48 < |
| -7  | 21 | 3 | 1007.55 | 28.62   | 1490.85 < |
| -6  | 21 | 3 | 114.04  | 20.03   | 20.03 <   |
| -3  | 21 | 3 | 127.98  | 25.75   | 14.31 <   |
| -2  | 21 | 3 | 62.19   | 17.17   | 11.45 <   |
| -1  | 21 | 3 | 175.30  | 51.51   | 17.17 <   |
| 0   | 21 | 3 | 6.72    | 14.31   | 14.31 <   |
| 1   | 21 | 3 | 16.74   | 42.92   | 20.03 <   |
| 2   | 21 | 3 | 30.75   | 22.89   | 291.87 <  |
| 3   | 21 | 3 | 2.06    | 17.17   | 20.03 <   |
| 4   | 21 | 3 | 3427.36 | 2767.08 | 228.92 o  |
| 5   | 21 | 3 | 1872.30 | 1642.51 | 154.52 o  |
| 6   | 21 | 3 | 24.42   | 54.37   | 17.17 o   |
| 7   | 21 | 3 | 912.23  | 206.03  | 483.60 <  |
| 9   | 21 | 3 | 153.23  | 45.78   | 20.03 <   |
| -10 | 22 | 3 | 145.21  | -2.86   | 22.89 <   |
| -9  | 22 | 3 | 5.57    | -5.72   | 103.01 <  |
| -8  | 22 | 3 | 40.49   | 31.48   | 20.03 <   |
| -7  | 22 | 3 | 106.15  | 37.20   | 17.17 <   |
| -6  | 22 | 3 | 185.10  | 223.20  | 37.20 o   |
| -5  | 22 | 3 | 26.93   | 17.17   | 11.45 <   |
| -4  | 22 | 3 | 926.73  | 25.75   | 340.52 <  |
| -3  | 22 | 3 | 12.56   | 2.86    | 11.45 <   |
| -2  | 22 | 3 | 7.55    | 5.72    | 14.31 <   |
| -1  | 22 | 3 | 122.04  | 54.37   | 20.03 <   |

## paulkerrite.cif

|    |    |   |         |         |           |
|----|----|---|---------|---------|-----------|
| 0  | 22 | 3 | 122.04  | 37.20   | 20.03 <   |
| 1  | 22 | 3 | 79.03   | 57.23   | 17.17 o   |
| 2  | 22 | 3 | 1.56    | 2.86    | 14.31 <   |
| 3  | 22 | 3 | 28.22   | 14.31   | 28.62 <   |
| 4  | 22 | 3 | 1097.40 | 950.02  | 111.60 o  |
| 5  | 22 | 3 | 7.27    | 17.17   | 22.89 <   |
| 6  | 22 | 3 | 68.17   | 48.65   | 277.57 <  |
| 7  | 22 | 3 | 2.33    | 20.03   | 14.31 <   |
| 8  | 22 | 3 | 71.41   | 45.78   | 17.17 <   |
| 9  | 22 | 3 | 68.74   | 34.34   | 20.03 <   |
| -9 | 23 | 3 | 36.97   | 5.72    | 22.89 <   |
| -8 | 23 | 3 | 233.53  | 165.97  | 51.51 o   |
| -7 | 23 | 3 | 368.49  | 160.24  | 1241.90 < |
| -6 | 23 | 3 | 164.35  | 80.12   | 25.75 o   |
| -5 | 23 | 3 | 897.82  | 14.31   | 537.96 <  |
| -4 | 23 | 3 | 4473.04 | 5854.65 | 423.50 o  |
| -3 | 23 | 3 | 502.69  | -28.62  | 3522.52 < |
| -2 | 23 | 3 | 193.57  | 186.00  | 48.65 o   |
| -1 | 23 | 3 | 289.01  | 194.58  | 60.09 o   |
| 0  | 23 | 3 | 1.39    | 2.86    | 14.31 <   |
| 1  | 23 | 3 | 430.14  | 231.78  | 42.92 o   |
| 2  | 23 | 3 | 445.95  | 440.67  | 48.65 o   |
| 3  | 23 | 3 | 1015.84 | 1090.24 | 71.54 o   |
| 4  | 23 | 3 | 4295.53 | 1991.61 | 629.53 o  |
| 5  | 23 | 3 | 571.74  | 303.32  | 65.81 o   |
| 6  | 23 | 3 | 127.50  | 65.81   | 25.75 <   |
| 7  | 23 | 3 | 436.06  | 289.01  | 48.65 o   |
| 8  | 23 | 3 | 268.54  | 131.63  | 91.57 <   |
| -8 | 24 | 3 | 58.82   | -2.86   | 25.75 <   |
| -7 | 24 | 3 | 9.31    | 5.72    | 20.03 <   |
| -6 | 24 | 3 | 152.24  | 217.48  | 51.51 o   |
| -5 | 24 | 3 | 23.43   | 17.17   | 11.45 <   |
| -4 | 24 | 3 | 27.85   | 17.17   | 11.45 <   |
| -3 | 24 | 3 | 51.66   | 31.48   | 14.31 <   |
| -2 | 24 | 3 | 0.23    | 0.00    | 14.31 <   |
| -1 | 24 | 3 | 3.47    | 2.86    | 37.20 <   |
| 0  | 24 | 3 | 33.52   | 20.03   | 28.62 <   |
| 1  | 24 | 3 | 2.53    | 5.72    | 20.03 <   |
| 2  | 24 | 3 | 1.15    | 2.86    | 17.17 <   |
| 3  | 24 | 3 | 26.15   | 28.62   | 25.75 <   |
| 4  | 24 | 3 | 4.87    | 8.58    | 14.31 <   |
| 5  | 24 | 3 | 16.82   | 17.17   | 20.03 <   |
| 6  | 24 | 3 | 111.72  | 65.81   | 22.89 <   |
| 7  | 24 | 3 | 2.86    | 2.86    | 14.31 <   |
| -7 | 25 | 3 | 3.55    | -2.86   | 22.89 <   |
| -6 | 25 | 3 | 47.68   | 8.58    | 31.48 <   |
| -5 | 25 | 3 | 0.48    | 2.86    | 11.45 <   |
| -4 | 25 | 3 | 86.96   | 45.78   | 17.17 <   |
| -3 | 25 | 3 | 392.95  | -22.89  | 340.52 <  |
| -2 | 25 | 3 | 1006.27 | -34.34  | 372.00 <  |
| 0  | 25 | 3 | 0.02    | -5.72   | 14.31 <   |
| 1  | 25 | 3 | 517.22  | 460.70  | 5339.58 < |
| 2  | 25 | 3 | 715.68  | 1307.71 | 206.03 o  |
| 3  | 25 | 3 | 372.89  | 414.92  | 82.98 o   |

## paulkerrite.cif

|     |    |   |          |          |         |   |
|-----|----|---|----------|----------|---------|---|
| 4   | 25 | 3 | 105.33   | 103.01   | 20.03   | o |
| 5   | 25 | 3 | 11.47    | 8.58     | 22.89   | < |
| 6   | 25 | 3 | 24.44    | 25.75    | 37.20   | < |
| 7   | 25 | 3 | 38.25    | 34.34    | 40.06   | < |
| -5  | 26 | 3 | 37.86    | -8.58    | 22.89   | < |
| -4  | 26 | 3 | 20.97    | 8.58     | 17.17   | < |
| -3  | 26 | 3 | 9.88     | 11.45    | 11.45   | < |
| -1  | 26 | 3 | 46.78    | 34.34    | 14.31   | < |
| 0   | 26 | 3 | 2.13     | 0.00     | 14.31   | < |
| 1   | 26 | 3 | 20.88    | 25.75    | 37.20   | < |
| 2   | 26 | 3 | 355.92   | 240.37   | 54.37   | o |
| 3   | 26 | 3 | 43.00    | 25.75    | 22.89   | < |
| 4   | 26 | 3 | 13.92    | 17.17    | 17.17   | < |
| 5   | 26 | 3 | 2.84     | 20.03    | 22.89   | < |
| 6   | 26 | 3 | 12.52    | 22.89    | 25.75   | < |
| 7   | 26 | 3 | 8.37     | 42.92    | 37.20   | < |
| -2  | 27 | 3 | 984.05   | -74.40   | 2609.70 | < |
| -1  | 27 | 3 | 1433.71  | 25.75    | 1359.22 | < |
| 0   | 27 | 3 | 3.35     | 8.58     | 22.89   | < |
| 1   | 27 | 3 | 2107.62  | 1905.77  | 191.72  | o |
| 2   | 27 | 3 | 1190.32  | 1768.41  | 117.32  | o |
| 3   | 27 | 3 | 7.66     | 40.06    | 25.75   | < |
| 4   | 27 | 3 | 234.72   | 186.00   | 37.20   | o |
| 5   | 27 | 3 | 63.14    | 103.01   | 31.48   | o |
| 6   | 27 | 3 | 127.79   | 331.93   | 65.81   | o |
| 0   | 28 | 3 | 75.49    | 17.17    | 22.89   | < |
| 1   | 28 | 3 | 12.37    | 20.03    | 28.62   | < |
| 2   | 28 | 3 | 34.19    | 31.48    | 34.34   | < |
| 3   | 28 | 3 | 79.01    | 34.34    | 31.48   | < |
| 4   | 28 | 3 | 58.18    | 40.06    | 31.48   | < |
| 5   | 28 | 3 | 2.47     | 11.45    | 25.75   | < |
| -14 | 0  | 4 | 237.50   | 97.29    | 123.04  | < |
| -13 | 0  | 4 | 548.41   | 537.96   | 57.23   | o |
| -12 | 0  | 4 | 2320.93  | 2395.09  | 769.75  | o |
| -11 | 0  | 4 | 12.18    | 14.31    | 17.17   | < |
| -10 | 0  | 4 | 1748.55  | 1731.21  | 163.11  | o |
| -9  | 0  | 4 | 1421.97  | 1407.86  | 94.43   | o |
| -8  | 0  | 4 | 4921.64  | 5259.46  | 271.84  | o |
| -7  | 0  | 4 | 12285.30 | 13792.50 | 669.59  | o |
| -6  | 0  | 4 | 33628.70 | 38430.10 | 1837.09 | o |
| -5  | 0  | 4 | 5434.40  | 5785.98  | 414.92  | o |
| -4  | 0  | 4 | 47197.00 | 50059.30 | 2383.64 | o |
| -3  | 0  | 4 | 31119.70 | 29170.20 | 1977.30 | o |
| -2  | 0  | 4 | 22152.70 | 21896.30 | 1047.31 | o |
| -1  | 0  | 4 | 73808.30 | 82354.30 | 3905.96 | o |
| 1   | 0  | 4 | 82749.80 | 91382.40 | 4332.33 | o |
| 2   | 0  | 4 | 22541.50 | 24388.70 | 1158.91 | o |
| 3   | 0  | 4 | 29980.00 | 27487.70 | 1310.57 | o |
| 4   | 0  | 4 | 38943.70 | 54311.50 | 3897.38 | o |
| 5   | 0  | 4 | 7020.63  | 5820.31  | 397.75  | o |
| 11  | 0  | 4 | 9.87     | 17.17    | 11.45   | < |
| 12  | 0  | 4 | 1987.81  | 2626.87  | 194.58  | o |
| 13  | 0  | 4 | 723.51   | -2.86    | 268.98  | < |
| -15 | 1  | 4 | 48.27    | 105.88   | 28.62   | o |

## paulkerrite.cif

|     |   |   |          |          |           |
|-----|---|---|----------|----------|-----------|
| -14 | 1 | 4 | 1.64     | 2.86     | 11.45 <   |
| -13 | 1 | 4 | 30.92    | 48.65    | 17.17 <   |
| -12 | 1 | 4 | 18.98    | 74.40    | 25.75 <   |
| -11 | 1 | 4 | 274.82   | 337.66   | 31.48 o   |
| -10 | 1 | 4 | 228.74   | 274.70   | 34.34 o   |
| -9  | 1 | 4 | 3.48     | 51.51    | 17.17 <   |
| -8  | 1 | 4 | 559.09   | 595.19   | 37.20 o   |
| -6  | 1 | 4 | 1759.40  | 1828.51  | 74.40 o   |
| -5  | 1 | 4 | 104.99   | 197.44   | 31.48 o   |
| -3  | 1 | 4 | 456.13   | 555.13   | 37.20 o   |
| 1   | 1 | 4 | 329.45   | 346.24   | 17.17 o   |
| 2   | 1 | 4 | 2010.70  | 2177.61  | 77.26 o   |
| 3   | 1 | 4 | 576.55   | 523.66   | 31.48 o   |
| 4   | 1 | 4 | 675.10   | 729.68   | 42.92 o   |
| 5   | 1 | 4 | 9.97     | 11.45    | 8.58 <    |
| 9   | 1 | 4 | 5.05     | 8.58     | 8.58 <    |
| 10  | 1 | 4 | 177.01   | 2.86     | 68.68 <   |
| 11  | 1 | 4 | 203.42   | 80.12    | 108.74 <  |
| 12  | 1 | 4 | 8.87     | -2.86    | 14.31 <   |
| 13  | 1 | 4 | 57.95    | 11.45    | 17.17 <   |
| -15 | 2 | 4 | 51.37    | 14.31    | 20.03 <   |
| -14 | 2 | 4 | 9.80     | 5.72     | 14.31 <   |
| -13 | 2 | 4 | 15.79    | 25.75    | 17.17 <   |
| -12 | 2 | 4 | 84.40    | 65.81    | 17.17 o   |
| -11 | 2 | 4 | 210.64   | 223.20   | 25.75 o   |
| -10 | 2 | 4 | 614.31   | 824.11   | 68.68 o   |
| -9  | 2 | 4 | 46.20    | 103.01   | 22.89 o   |
| -8  | 2 | 4 | 2511.74  | 2772.80  | 108.74 o  |
| -6  | 2 | 4 | 1807.39  | 1550.94  | 65.81 o   |
| -5  | 2 | 4 | 506.50   | 706.79   | 42.92 o   |
| -4  | 2 | 4 | 429.59   | 446.40   | 28.62 o   |
| -3  | 2 | 4 | 4162.60  | 4438.20  | 223.20 o  |
| -2  | 2 | 4 | 1526.12  | 1645.37  | 62.95 o   |
| 0   | 2 | 4 | 37811.90 | 34961.90 | 1181.80 o |
| 1   | 2 | 4 | 26634.70 | 32947.40 | 1113.13 o |
| 4   | 2 | 4 | 250.54   | 217.48   | 20.03 o   |
| 10  | 2 | 4 | 589.88   | 775.47   | 71.54 o   |
| 12  | 2 | 4 | 145.19   | -5.72    | 22.89 <   |
| 13  | 2 | 4 | 4.33     | 8.58     | 8.58 <    |
| -15 | 3 | 4 | 0.02     | 14.31    | 20.03 <   |
| -14 | 3 | 4 | 86.87    | 88.71    | 22.89 o   |
| -13 | 3 | 4 | 33.39    | 17.17    | 17.17 <   |
| -12 | 3 | 4 | 47.00    | 20.03    | 17.17 <   |
| -11 | 3 | 4 | 16.82    | 5.72     | 14.31 <   |
| -10 | 3 | 4 | 31.46    | 28.62    | 14.31 <   |
| -9  | 3 | 4 | 126.72   | 108.74   | 22.89 o   |
| -8  | 3 | 4 | 21.94    | 25.75    | 14.31 <   |
| -7  | 3 | 4 | 4.81     | 0.00     | 14.31 <   |
| -6  | 3 | 4 | 0.20     | 0.00     | 14.31 <   |
| -5  | 3 | 4 | 276.21   | 297.60   | 22.89 o   |
| -3  | 3 | 4 | 31.79    | 80.12    | 20.03 o   |
| -2  | 3 | 4 | 346.06   | 480.73   | 28.62 o   |
| -1  | 3 | 4 | 63.43    | 105.88   | 14.31 o   |
| 1   | 3 | 4 | 144.38   | 91.57    | 11.45 o   |

## paulkerrite.cif

|     |   |   |          |          |           |
|-----|---|---|----------|----------|-----------|
| 2   | 3 | 4 | 98.29    | 151.66   | 14.31 o   |
| 3   | 3 | 4 | 21.02    | 2.86     | 14.31 <   |
| 4   | 3 | 4 | 346.64   | 240.37   | 25.75 o   |
| 6   | 3 | 4 | 65.73    | 85.85    | 22.89 o   |
| 7   | 3 | 4 | 46.85    | 28.62    | 17.17 <   |
| 8   | 3 | 4 | 30.24    | 14.31    | 11.45 <   |
| 9   | 3 | 4 | 216.61   | 125.91   | 472.15 <  |
| 10  | 3 | 4 | 8.33     | 8.58     | 14.31 <   |
| 11  | 3 | 4 | 13.56    | 8.58     | 8.58 <    |
| 12  | 3 | 4 | 65.32    | -25.75   | 88.71 <   |
| 13  | 3 | 4 | 57.29    | 5.72     | 17.17 <   |
| -15 | 4 | 4 | 215.18   | 45.78    | 25.75 <   |
| -14 | 4 | 4 | 639.56   | 515.07   | 54.37 o   |
| -13 | 4 | 4 | 579.78   | 337.66   | 835.56 <  |
| -12 | 4 | 4 | 2291.70  | 2824.31  | 140.21 o  |
| -11 | 4 | 4 | 25.83    | 22.89    | 14.31 <   |
| -10 | 4 | 4 | 279.08   | 263.26   | 28.62 o   |
| -9  | 4 | 4 | 1160.66  | 1347.77  | 60.09 o   |
| -8  | 4 | 4 | 3537.66  | 4272.24  | 145.94 o  |
| -7  | 4 | 4 | 1515.97  | 1745.52  | 68.68 o   |
| -6  | 4 | 4 | 46124.50 | 45998.80 | 1393.56 o |
| -4  | 4 | 4 | 9625.29  | 11838.10 | 480.73 o  |
| -2  | 4 | 4 | 4299.64  | 4080.52  | 131.63 o  |
| -1  | 4 | 4 | 22123.50 | 23993.80 | 732.55 o  |
| 1   | 4 | 4 | 21445.20 | 22491.50 | 681.04 o  |
| 2   | 4 | 4 | 3024.42  | 2549.61  | 108.74 o  |
| 7   | 4 | 4 | 1321.64  | 1281.96  | 94.43 o   |
| 8   | 4 | 4 | 4731.90  | 4037.59  | 206.03 o  |
| 9   | 4 | 4 | 832.40   | 111.60   | 432.09 <  |
| 10  | 4 | 4 | 0.37     | 5.72     | 14.31 <   |
| 11  | 4 | 4 | 20.76    | 17.17    | 11.45 <   |
| 13  | 4 | 4 | 649.60   | -37.20   | 123.04 <  |
| -15 | 5 | 4 | 0.17     | -2.86    | 22.89 <   |
| -14 | 5 | 4 | 62.71    | 37.20    | 17.17 <   |
| -13 | 5 | 4 | 4.26     | -5.72    | 14.31 <   |
| -12 | 5 | 4 | 0.79     | -17.17   | 14.31 <   |
| -11 | 5 | 4 | 76.22    | 108.74   | 20.03 o   |
| -10 | 5 | 4 | 107.17   | 151.66   | 22.89 o   |
| -9  | 5 | 4 | 656.25   | 669.59   | 40.06 o   |
| -8  | 5 | 4 | 215.61   | 200.31   | 22.89 o   |
| -7  | 5 | 4 | 184.09   | 240.37   | 22.89 o   |
| -6  | 5 | 4 | 295.71   | 289.01   | 25.75 o   |
| -5  | 5 | 4 | 1939.25  | 2352.16  | 82.98 o   |
| -4  | 5 | 4 | 1560.05  | 1390.69  | 71.54 o   |
| -3  | 5 | 4 | 237.94   | 237.51   | 17.17 o   |
| -1  | 5 | 4 | 147.68   | 114.46   | 14.31 o   |
| 0   | 5 | 4 | 245.63   | 274.70   | 17.17 o   |
| 1   | 5 | 4 | 40.63    | 65.81    | 11.45 o   |
| 2   | 5 | 4 | 239.61   | 289.01   | 22.89 o   |
| 3   | 5 | 4 | 23.78    | 34.34    | 8.58 o    |
| 5   | 5 | 4 | 2512.48  | 2034.53  | 88.71 o   |
| 7   | 5 | 4 | 15.56    | 14.31    | 11.45 <   |
| 8   | 5 | 4 | 98.18    | 31.48    | 180.27 <  |
| 10  | 5 | 4 | 239.44   | 45.78    | 82.98 <   |

## paulkerrite.cif

|     |   |   |          |          |           |
|-----|---|---|----------|----------|-----------|
| 11  | 5 | 4 | 65.27    | 22.89    | 20.03 <   |
| 12  | 5 | 4 | 0.33     | -5.72    | 20.03 <   |
| 13  | 5 | 4 | 0.16     | -8.58    | 17.17 <   |
| -15 | 6 | 4 | 58.13    | -8.58    | 31.48 <   |
| -14 | 6 | 4 | 45.95    | 34.34    | 20.03 <   |
| -13 | 6 | 4 | 1043.40  | 1505.16  | 82.98 o   |
| -12 | 6 | 4 | 1793.53  | 2526.71  | 123.04 o  |
| -11 | 6 | 4 | 118.31   | 163.11   | 22.89 o   |
| -10 | 6 | 4 | 1734.63  | 2217.67  | 97.29 o   |
| -9  | 6 | 4 | 1894.34  | 2518.13  | 120.18 o  |
| -8  | 6 | 4 | 319.96   | 268.98   | 22.89 o   |
| -7  | 6 | 4 | 174.71   | 248.95   | 22.89 o   |
| -6  | 6 | 4 | 428.57   | 552.27   | 31.48 o   |
| -5  | 6 | 4 | 873.63   | 855.59   | 40.06 o   |
| -4  | 6 | 4 | 23933.90 | 25684.90 | 1010.11 o |
| -3  | 6 | 4 | 11733.50 | 11612.00 | 363.41 o  |
| -2  | 6 | 4 | 6329.84  | 6495.63  | 266.12 o  |
| -1  | 6 | 4 | 3016.68  | 3688.49  | 120.18 o  |
| 0   | 6 | 4 | 2632.76  | 2280.62  | 100.15 o  |
| 1   | 6 | 4 | 3320.74  | 3894.52  | 143.08 o  |
| 2   | 6 | 4 | 6254.95  | 5760.22  | 231.78 o  |
| 5   | 6 | 4 | 532.18   | 286.15   | 42.92 o   |
| 6   | 6 | 4 | 46.46    | 22.89    | 14.31 <   |
| 7   | 6 | 4 | 172.09   | 105.88   | 17.17 o   |
| 8   | 6 | 4 | 1092.53  | 320.49   | 806.95 <  |
| 9   | 6 | 4 | 1645.84  | 1568.11  | 120.18 o  |
| 10  | 6 | 4 | 925.05   | 340.52   | 784.05 <  |
| 11  | 6 | 4 | 63.69    | 34.34    | 20.03 <   |
| 12  | 6 | 4 | 1227.91  | -40.06   | 1307.71 < |
| -14 | 7 | 4 | 42.99    | 14.31    | 20.03 <   |
| -13 | 7 | 4 | 12.58    | 2.86     | 17.17 <   |
| -12 | 7 | 4 | 38.64    | 45.78    | 17.17 <   |
| -11 | 7 | 4 | 10.80    | 8.58     | 14.31 <   |
| -10 | 7 | 4 | 127.18   | 145.94   | 22.89 o   |
| -9  | 7 | 4 | 633.43   | 686.76   | 45.78 o   |
| -8  | 7 | 4 | 516.48   | 560.86   | 40.06 o   |
| -7  | 7 | 4 | 73.89    | 80.12    | 14.31 o   |
| -6  | 7 | 4 | 804.52   | 829.84   | 40.06 o   |
| -5  | 7 | 4 | 3.60     | 45.78    | 14.31 o   |
| -4  | 7 | 4 | 3.12     | 48.65    | 14.31 o   |
| -3  | 7 | 4 | 74.98    | 28.62    | 14.31 <   |
| -2  | 7 | 4 | 448.53   | 480.73   | 28.62 o   |
| -1  | 7 | 4 | 373.06   | 289.01   | 20.03 o   |
| 0   | 7 | 4 | 18.60    | 25.75    | 11.45 <   |
| 2   | 7 | 4 | 396.43   | 366.27   | 22.89 o   |
| 3   | 7 | 4 | 58.49    | 25.75    | 8.58 <    |
| 4   | 7 | 4 | 20.57    | 25.75    | 8.58 <    |
| 5   | 7 | 4 | 100.92   | 31.48    | 11.45 <   |
| 7   | 7 | 4 | 297.75   | -8.58    | 28.62 <   |
| 8   | 7 | 4 | 472.62   | 200.31   | 497.90 <  |
| 9   | 7 | 4 | 683.94   | 632.39   | 57.23 o   |
| 10  | 7 | 4 | 125.33   | 42.92    | 346.24 <  |
| 11  | 7 | 4 | 0.18     | 5.72     | 11.45 <   |
| 12  | 7 | 4 | 19.86    | -5.72    | 20.03 <   |

## paulkerrite.cif

|     |    |   |          |          |          |
|-----|----|---|----------|----------|----------|
| 13  | 7  | 4 | 35.03    | 37.20    | 25.75 <  |
| -14 | 8  | 4 | 374.52   | 57.23    | 37.20 <  |
| -13 | 8  | 4 | 6.65     | 20.03    | 143.08 < |
| -12 | 8  | 4 | 6008.73  | 7594.45  | 389.17 o |
| -11 | 8  | 4 | 43.82    | 71.54    | 20.03 o  |
| -10 | 8  | 4 | 74.83    | 40.06    | 20.03 <  |
| -9  | 8  | 4 | 1538.34  | 1376.39  | 186.00 o |
| -8  | 8  | 4 | 4366.37  | 5537.02  | 203.17 o |
| -7  | 8  | 4 | 2705.44  | 3164.83  | 123.04 o |
| -6  | 8  | 4 | 16997.20 | 19552.70 | 609.50 o |
| -5  | 8  | 4 | 7505.83  | 7674.57  | 271.84 o |
| -4  | 8  | 4 | 1427.16  | 1576.69  | 68.68 o  |
| -3  | 8  | 4 | 68.51    | 31.48    | 11.45 <  |
| -2  | 8  | 4 | 7707.71  | 6853.32  | 283.29 o |
| -1  | 8  | 4 | 255.77   | 289.01   | 25.75 o  |
| 1   | 8  | 4 | 508.22   | 572.30   | 34.34 o  |
| 3   | 8  | 4 | 2.32     | 22.89    | 8.58 <   |
| 7   | 8  | 4 | 3038.43  | 672.46   | 864.18 < |
| 8   | 8  | 4 | 2491.48  | 692.49   | 612.36 < |
| 9   | 8  | 4 | 1096.94  | 1095.96  | 91.57 o  |
| 10  | 8  | 4 | 374.78   | -17.17   | 649.56 < |
| 11  | 8  | 4 | 86.79    | 57.23    | 271.84 < |
| 12  | 8  | 4 | 5504.98  | 8009.37  | 569.44 o |
| 13  | 8  | 4 | 14.21    | -5.72    | 28.62 <  |
| -14 | 9  | 4 | 15.21    | 5.72     | 31.48 <  |
| -13 | 9  | 4 | 0.72     | 5.72     | 14.31 <  |
| -12 | 9  | 4 | 61.04    | 65.81    | 20.03 o  |
| -11 | 9  | 4 | 88.47    | 54.37    | 37.20 <  |
| -10 | 9  | 4 | 1.09     | -5.72    | 14.31 <  |
| -9  | 9  | 4 | 9.95     | 5.72     | 17.17 <  |
| -8  | 9  | 4 | 13.53    | 17.17    | 14.31 <  |
| -7  | 9  | 4 | 683.09   | 838.42   | 62.95 o  |
| -6  | 9  | 4 | 12.19    | 31.48    | 14.31 <  |
| -5  | 9  | 4 | 406.55   | 443.53   | 31.48 o  |
| -4  | 9  | 4 | 36.81    | 80.12    | 14.31 o  |
| -3  | 9  | 4 | 549.00   | 523.66   | 28.62 o  |
| -1  | 9  | 4 | 23.26    | 25.75    | 11.45 <  |
| 1   | 9  | 4 | 36.31    | 31.48    | 8.58 o   |
| 3   | 9  | 4 | 193.43   | 120.18   | 20.03 o  |
| 4   | 9  | 4 | 211.16   | 128.77   | 22.89 o  |
| 5   | 9  | 4 | 95.40    | 48.65    | 14.31 o  |
| 6   | 9  | 4 | 49.87    | 17.17    | 11.45 <  |
| 8   | 9  | 4 | 238.98   | 0.00     | 294.74 < |
| 9   | 9  | 4 | 12.20    | 14.31    | 20.03 <  |
| 10  | 9  | 4 | 1.02     | -2.86    | 14.31 <  |
| 11  | 9  | 4 | 102.15   | 45.78    | 105.88 < |
| 12  | 9  | 4 | 18.42    | 2.86     | 14.31 <  |
| 13  | 9  | 4 | 5.12     | 5.72     | 20.03 <  |
| -14 | 10 | 4 | 2.85     | -11.45   | 28.62 <  |
| -13 | 10 | 4 | 126.43   | 71.54    | 22.89 o  |
| -12 | 10 | 4 | 1055.44  | 1073.07  | 68.68 o  |
| -11 | 10 | 4 | 59.12    | 62.95    | 22.89 <  |
| -10 | 10 | 4 | 134.07   | 140.21   | 228.92 < |
| -9  | 10 | 4 | 1177.45  | 769.75   | 351.97 < |



## paulkerrite.cif

|     |    |   |          |          |          |   |
|-----|----|---|----------|----------|----------|---|
| -8  | 10 | 4 | 1444.55  | 1533.77  | 71.54    | o |
| -7  | 10 | 4 | 1246.98  | 981.50   | 220.34   | o |
| -5  | 10 | 4 | 1126.37  | 1070.21  | 62.95    | o |
| -4  | 10 | 4 | 10048.30 | 10679.20 | 374.86   | o |
| -3  | 10 | 4 | 13918.50 | 11806.60 | 414.92   | o |
| -2  | 10 | 4 | 124.54   | 94.43    | 14.31    | o |
| -1  | 10 | 4 | 281.25   | 314.77   | 34.34    | o |
| 0   | 10 | 4 | 6879.96  | 5705.85  | 234.64   | o |
| 1   | 10 | 4 | 34.48    | 100.15   | 17.17    | o |
| 2   | 10 | 4 | 87.50    | 8.58     | 11.45    | < |
| 5   | 10 | 4 | 571.31   | 271.84   | 57.23    | o |
| 7   | 10 | 4 | 449.45   | 349.10   | 51.51    | o |
| 8   | 10 | 4 | 628.84   | 0.00     | 463.57   | < |
| 10  | 10 | 4 | 486.26   | -11.45   | 2154.72  | < |
| 11  | 10 | 4 | 4.29     | 8.58     | 14.31    | < |
| 12  | 10 | 4 | 2109.84  | 575.16   | 360.55   | < |
| 13  | 10 | 4 | 169.52   | 40.06    | 22.89    | < |
| -14 | 11 | 4 | 19.05    | -5.72    | 31.48    | < |
| -13 | 11 | 4 | 31.24    | 22.89    | 22.89    | < |
| -12 | 11 | 4 | 6.63     | -8.58    | 17.17    | < |
| -11 | 11 | 4 | 13.14    | 28.62    | 20.03    | < |
| -10 | 11 | 4 | 3.55     | 2.86     | 14.31    | < |
| -9  | 11 | 4 | 29.14    | 28.62    | 14.31    | < |
| -8  | 11 | 4 | 318.51   | 440.67   | 34.34    | o |
| -7  | 11 | 4 | 800.85   | 978.64   | 60.09    | o |
| -6  | 11 | 4 | 350.69   | 228.92   | 583.75   | < |
| -5  | 11 | 4 | 0.95     | 25.75    | 28.62    | < |
| -4  | 11 | 4 | 43.67    | 40.06    | 11.45    | o |
| -3  | 11 | 4 | 136.97   | 131.63   | 17.17    | o |
| -2  | 11 | 4 | 30.64    | 48.65    | 11.45    | o |
| -1  | 11 | 4 | 31.38    | 17.17    | 11.45    | < |
| 0   | 11 | 4 | 18.37    | 31.48    | 11.45    | < |
| 1   | 11 | 4 | 15.17    | 2.86     | 11.45    | < |
| 2   | 11 | 4 | 128.27   | 40.06    | 14.31    | < |
| 3   | 11 | 4 | 174.78   | 94.43    | 17.17    | o |
| 4   | 11 | 4 | 4.91     | 17.17    | 14.31    | < |
| 5   | 11 | 4 | 70.34    | 45.78    | 11.45    | o |
| 6   | 11 | 4 | 160.40   | 20.03    | 14.31    | < |
| 8   | 11 | 4 | 709.33   | 48.65    | 1562.39  | < |
| 9   | 11 | 4 | 19.83    | 8.58     | 14.31    | < |
| 10  | 11 | 4 | 24.27    | 11.45    | 14.31    | < |
| 11  | 11 | 4 | 0.20     | 2.86     | 17.17    | < |
| 12  | 11 | 4 | 73.50    | 54.37    | 25.75    | < |
| 13  | 11 | 4 | 14.29    | 5.72     | 22.89    | < |
| -14 | 12 | 4 | 217.33   | -68.68   | 220.34   | < |
| -13 | 12 | 4 | 347.42   | -14.31   | 42.92    | < |
| -11 | 12 | 4 | 71.04    | 37.20    | 20.03    | < |
| -10 | 12 | 4 | 832.31   | 240.37   | 10078.20 | < |
| -9  | 12 | 4 | 2239.49  | 2432.28  | 103.01   | o |
| -8  | 12 | 4 | 1805.39  | 2045.98  | 103.01   | o |
| -7  | 12 | 4 | 3126.54  | 3459.57  | 188.86   | o |
| -6  | 12 | 4 | 13641.70 | 16696.90 | 812.67   | o |
| -5  | 12 | 4 | 1864.05  | 2028.81  | 157.38   | o |
| -4  | 12 | 4 | 6846.40  | 5848.93  | 251.81   | o |

## paulkerrite.cif

|     |    |   |          |          |         |   |
|-----|----|---|----------|----------|---------|---|
| -2  | 12 | 4 | 9687.42  | 7972.17  | 294.74  | o |
| -1  | 12 | 4 | 1802.63  | 1356.36  | 71.54   | o |
| 0   | 12 | 4 | 49906.10 | 43984.30 | 1714.05 | o |
| 8   | 12 | 4 | 1286.69  | 28.62    | 400.61  | < |
| 10  | 12 | 4 | 958.70   | -31.48   | 2283.49 | < |
| 11  | 12 | 4 | 95.56    | 123.04   | 28.62   | o |
| 12  | 12 | 4 | 2213.76  | -65.81   | 578.03  | < |
| 13  | 12 | 4 | 357.73   | 208.89   | 57.23   | o |
| -13 | 13 | 4 | 0.30     | 0.00     | 28.62   | < |
| -12 | 13 | 4 | 39.96    | 5.72     | 17.17   | < |
| -11 | 13 | 4 | 44.27    | 14.31    | 17.17   | < |
| -10 | 13 | 4 | 366.43   | 51.51    | 1041.59 | < |
| -9  | 13 | 4 | 328.10   | 82.98    | 163.11  | < |
| -8  | 13 | 4 | 176.65   | 85.85    | 20.03   | o |
| -7  | 13 | 4 | 21.86    | 22.89    | 20.03   | < |
| -6  | 13 | 4 | 245.62   | 260.40   | 45.78   | o |
| -5  | 13 | 4 | 6.53     | 17.17    | 14.31   | < |
| -4  | 13 | 4 | 58.47    | 140.21   | 20.03   | o |
| -3  | 13 | 4 | 168.24   | 151.66   | 20.03   | o |
| -2  | 13 | 4 | 389.07   | 283.29   | 28.62   | o |
| -1  | 13 | 4 | 686.70   | 683.90   | 37.20   | o |
| 0   | 13 | 4 | 37.87    | 28.62    | 11.45   | < |
| 1   | 13 | 4 | 410.40   | 231.78   | 34.34   | o |
| 2   | 13 | 4 | 68.63    | 48.65    | 17.17   | < |
| 3   | 13 | 4 | 112.21   | 62.95    | 14.31   | o |
| 4   | 13 | 4 | 119.52   | 117.32   | 25.75   | o |
| 5   | 13 | 4 | 44.52    | 11.45    | 22.89   | < |
| 6   | 13 | 4 | 623.34   | 91.57    | 741.13  | < |
| 7   | 13 | 4 | 170.08   | 14.31    | 186.00  | < |
| 8   | 13 | 4 | 40.33    | 17.17    | 14.31   | < |
| 9   | 13 | 4 | 396.27   | 5.72     | 60.09   | < |
| 10  | 13 | 4 | 209.20   | 286.15   | 62.95   | o |
| 11  | 13 | 4 | 8.68     | 5.72     | 20.03   | < |
| 12  | 13 | 4 | 62.53    | 25.75    | 25.75   | < |
| 13  | 13 | 4 | 7.03     | 2.86     | 31.48   | < |
| -13 | 14 | 4 | 589.52   | -125.91  | 738.27  | < |
| -12 | 14 | 4 | 1.84     | -5.72    | 22.89   | < |
| -11 | 14 | 4 | 229.13   | 22.89    | 77.26   | < |
| -10 | 14 | 4 | 828.85   | 320.49   | 480.73  | < |
| -9  | 14 | 4 | 2256.31  | 1084.51  | 331.93  | o |
| -8  | 14 | 4 | 299.04   | 463.57   | 71.54   | o |
| -7  | 14 | 4 | 484.54   | 246.09   | 226.06  | < |
| -6  | 14 | 4 | 1462.86  | 1631.06  | 105.88  | o |
| -5  | 14 | 4 | 355.61   | 145.94   | 48.65   | < |
| -4  | 14 | 4 | 97.87    | 57.23    | 14.31   | o |
| -2  | 14 | 4 | 2829.05  | 2589.67  | 123.04  | o |
| -1  | 14 | 4 | 1400.10  | 1127.44  | 62.95   | o |
| 4   | 14 | 4 | 7.53     | 40.06    | 20.03   | < |
| 7   | 14 | 4 | 366.99   | 123.04   | 88.71   | < |
| 8   | 14 | 4 | 829.31   | 163.11   | 1115.99 | < |
| 9   | 14 | 4 | 2360.43  | 11.45    | 7494.30 | < |
| 10  | 14 | 4 | 337.98   | 440.67   | 337.66  | < |
| 11  | 14 | 4 | 151.39   | 103.01   | 157.38  | < |
| 12  | 14 | 4 | 97.92    | 54.37    | 45.78   | < |

## paulkerrite.cif

|     |    |   |          |          |           |
|-----|----|---|----------|----------|-----------|
| -13 | 15 | 4 | 48.20    | -20.03   | 28.62 <   |
| -12 | 15 | 4 | 10.97    | 5.72     | 25.75 <   |
| -11 | 15 | 4 | 8.78     | 11.45    | 20.03 <   |
| -10 | 15 | 4 | 12.03    | 2.86     | 17.17 <   |
| -9  | 15 | 4 | 283.08   | 123.04   | 34.34 o   |
| -8  | 15 | 4 | 168.77   | 148.80   | 28.62 o   |
| -7  | 15 | 4 | 218.54   | 125.91   | 34.34 o   |
| -6  | 15 | 4 | 2.28     | 2.86     | 20.03 <   |
| -5  | 15 | 4 | 72.46    | 14.31    | 14.31 <   |
| -4  | 15 | 4 | 289.40   | 197.44   | 28.62 o   |
| -3  | 15 | 4 | 232.45   | 171.69   | 22.89 o   |
| -1  | 15 | 4 | 728.24   | 623.81   | 37.20 o   |
| 0   | 15 | 4 | 121.88   | 77.26    | 22.89 o   |
| 2   | 15 | 4 | 126.76   | 74.40    | 17.17 o   |
| 3   | 15 | 4 | 126.10   | 71.54    | 22.89 o   |
| 4   | 15 | 4 | 5.92     | 34.34    | 54.37 <   |
| 5   | 15 | 4 | 59.28    | 25.75    | 17.17 <   |
| 6   | 15 | 4 | 46.65    | 17.17    | 14.31 <   |
| 7   | 15 | 4 | 195.67   | 25.75    | 786.92 <  |
| 8   | 15 | 4 | 134.66   | 40.06    | 14.31 <   |
| 9   | 15 | 4 | 284.88   | 57.23    | 349.10 <  |
| 10  | 15 | 4 | 5.80     | 0.00     | 17.17 <   |
| 11  | 15 | 4 | 5.53     | 11.45    | 17.17 <   |
| 12  | 15 | 4 | 27.55    | -5.72    | 28.62 <   |
| -12 | 16 | 4 | 138.72   | -71.54   | 91.57 <   |
| -11 | 16 | 4 | 10.41    | 2.86     | 14.31 <   |
| -10 | 16 | 4 | 58.02    | 22.89    | 17.17 <   |
| -9  | 16 | 4 | 3844.53  | 2841.48  | 168.83 o  |
| -8  | 16 | 4 | 1068.60  | 789.78   | 68.68 o   |
| -7  | 16 | 4 | 1938.03  | 394.89   | 343.38 <  |
| -6  | 16 | 4 | 17499.20 | 14336.20 | 706.79 o  |
| -5  | 16 | 4 | 1439.95  | 1138.88  | 80.12 o   |
| 2   | 16 | 4 | 222.41   | 165.97   | 25.75 o   |
| 8   | 16 | 4 | 1255.36  | -37.20   | 2091.76 < |
| 9   | 16 | 4 | 3297.58  | -85.85   | 2583.95 < |
| 10  | 16 | 4 | 2.29     | 2.86     | 14.31 <   |
| 11  | 16 | 4 | 0.64     | 0.00     | 22.89 <   |
| 12  | 16 | 4 | 246.81   | 234.64   | 71.54 o   |
| -12 | 17 | 4 | 0.52     | 11.45    | 28.62 <   |
| -11 | 17 | 4 | 1.79     | -2.86    | 22.89 <   |
| -10 | 17 | 4 | 36.56    | 14.31    | 17.17 <   |
| -9  | 17 | 4 | 18.86    | 28.62    | 17.17 <   |
| -8  | 17 | 4 | 77.46    | 65.81    | 20.03 o   |
| -7  | 17 | 4 | 13.35    | 17.17    | 17.17 <   |
| -6  | 17 | 4 | 112.96   | 105.88   | 25.75 o   |
| -5  | 17 | 4 | 286.92   | 240.37   | 37.20 o   |
| -4  | 17 | 4 | 57.85    | 25.75    | 11.45 <   |
| -3  | 17 | 4 | 8.05     | 14.31    | 17.17 <   |
| -2  | 17 | 4 | 6.31     | -5.72    | 20.03 <   |
| -1  | 17 | 4 | 68.21    | 28.62    | 11.45 <   |
| 0   | 17 | 4 | 8.89     | 20.03    | 14.31 <   |
| 1   | 17 | 4 | 19.62    | 17.17    | 17.17 <   |
| 2   | 17 | 4 | 228.22   | 134.49   | 25.75 o   |
| 3   | 17 | 4 | 30.65    | 28.62    | 14.31 <   |

## paulkerrite.cif

|     |    |   |         |        |           |
|-----|----|---|---------|--------|-----------|
| 4   | 17 | 4 | 82.02   | 37.20  | 22.89 <   |
| 5   | 17 | 4 | 317.56  | 240.37 | 40.06 o   |
| 6   | 17 | 4 | 154.12  | 40.06  | 20.03 <   |
| 7   | 17 | 4 | 47.80   | 28.62  | 14.31 <   |
| 8   | 17 | 4 | 24.10   | 25.75  | 14.31 <   |
| 9   | 17 | 4 | 6.28    | 5.72   | 14.31 <   |
| 10  | 17 | 4 | 48.83   | 17.17  | 14.31 <   |
| 11  | 17 | 4 | 0.01    | 5.72   | 48.65 <   |
| 12  | 17 | 4 | 1.57    | 17.17  | 25.75 <   |
| -11 | 18 | 4 | 112.70  | -25.75 | 443.53 <  |
| -10 | 18 | 4 | 116.29  | 20.03  | 351.97 <  |
| -9  | 18 | 4 | 14.11   | 20.03  | 20.03 <   |
| -8  | 18 | 4 | 316.93  | 145.94 | 57.23 <   |
| -7  | 18 | 4 | 1.72    | 25.75  | 20.03 <   |
| -6  | 18 | 4 | 412.68  | 234.64 | 40.06 o   |
| -5  | 18 | 4 | 58.68   | 25.75  | 11.45 <   |
| -3  | 18 | 4 | 63.54   | 8.58   | 11.45 <   |
| -2  | 18 | 4 | 955.03  | -5.72  | 37.20 <   |
| 0   | 18 | 4 | 731.26  | 689.62 | 77.26 o   |
| 2   | 18 | 4 | 1109.98 | 909.96 | 71.54 o   |
| 3   | 18 | 4 | 2.61    | 11.45  | 14.31 <   |
| 4   | 18 | 4 | 899.12  | 220.34 | 437.81 <  |
| 5   | 18 | 4 | 34.08   | 20.03  | 14.31 <   |
| 6   | 18 | 4 | 188.16  | 125.91 | 28.62 o   |
| 7   | 18 | 4 | 8.78    | 25.75  | 17.17 <   |
| 8   | 18 | 4 | 202.41  | 71.54  | 323.35 <  |
| 9   | 18 | 4 | 7.44    | 14.31  | 17.17 <   |
| 10  | 18 | 4 | 219.02  | -2.86  | 520.79 <  |
| 11  | 18 | 4 | 139.43  | -71.54 | 2915.88 < |
| 12  | 18 | 4 | 198.91  | 117.32 | 54.37 <   |
| -11 | 19 | 4 | 73.22   | -8.58  | 31.48 <   |
| -10 | 19 | 4 | 10.54   | 17.17  | 22.89 <   |
| -9  | 19 | 4 | 1.07    | 2.86   | 17.17 <   |
| -8  | 19 | 4 | 267.86  | 31.48  | 148.80 <  |
| -7  | 19 | 4 | 239.77  | 34.34  | 25.75 <   |
| -6  | 19 | 4 | 153.44  | 108.74 | 22.89 o   |
| -5  | 19 | 4 | 80.19   | 22.89  | 14.31 <   |
| -3  | 19 | 4 | 247.56  | 123.04 | 28.62 o   |
| -2  | 19 | 4 | 48.75   | 34.34  | 14.31 <   |
| -1  | 19 | 4 | 18.71   | 8.58   | 14.31 <   |
| 0   | 19 | 4 | 6.08    | 8.58   | 14.31 <   |
| 1   | 19 | 4 | 10.25   | 2.86   | 14.31 <   |
| 2   | 19 | 4 | 10.66   | 17.17  | 20.03 <   |
| 3   | 19 | 4 | 196.44  | 151.66 | 22.89 o   |
| 4   | 19 | 4 | 7.94    | 42.92  | 17.17 <   |
| 5   | 19 | 4 | 28.19   | 17.17  | 14.31 <   |
| 6   | 19 | 4 | 3.00    | 37.20  | 20.03 <   |
| 7   | 19 | 4 | 386.58  | 191.72 | 37.20 o   |
| 8   | 19 | 4 | 246.88  | 88.71  | 145.94 <  |
| 9   | 19 | 4 | 21.52   | 17.17  | 17.17 <   |
| 10  | 19 | 4 | 8.88    | 0.00   | 20.03 <   |
| 11  | 19 | 4 | 35.05   | 5.72   | 25.75 <   |
| -10 | 20 | 4 | 79.52   | -2.86  | 25.75 <   |
| -9  | 20 | 4 | 669.17  | 901.38 | 100.15 o  |

## paulkerrite.cif

|     |    |   |         |         |           |
|-----|----|---|---------|---------|-----------|
| -8  | 20 | 4 | 751.90  | -31.48  | 526.52 <  |
| -7  | 20 | 4 | 1345.75 | -82.98  | 2294.93 < |
| -4  | 20 | 4 | 273.15  | 120.18  | 28.62 o   |
| 0   | 20 | 4 | 5276.60 | 3851.59 | 234.64 o  |
| 1   | 20 | 4 | 2347.24 | 1791.31 | 180.27 o  |
| 2   | 20 | 4 | 1454.76 | 1390.69 | 94.43 o   |
| 3   | 20 | 4 | 1015.14 | 743.99  | 57.23 o   |
| 4   | 20 | 4 | 87.35   | 143.08  | 31.48 o   |
| 5   | 20 | 4 | 692.96  | 383.44  | 68.68 o   |
| 7   | 20 | 4 | 1212.51 | 726.82  | 74.40 o   |
| 8   | 20 | 4 | 282.46  | 31.48   | 60.09 <   |
| 9   | 20 | 4 | 481.30  | -17.17  | 1058.76 < |
| 10  | 20 | 4 | 277.57  | -40.06  | 732.55 <  |
| -10 | 21 | 4 | 18.72   | 0.00    | 20.03 <   |
| -9  | 21 | 4 | 0.87    | 8.58    | 22.89 <   |
| -8  | 21 | 4 | 20.72   | 5.72    | 14.31 <   |
| -7  | 21 | 4 | 4.88    | 8.58    | 14.31 <   |
| -6  | 21 | 4 | 9.92    | 5.72    | 11.45 <   |
| -5  | 21 | 4 | 52.72   | -8.58   | 17.17 <   |
| -3  | 21 | 4 | 110.52  | 62.95   | 17.17 o   |
| -2  | 21 | 4 | 19.31   | 37.20   | 11.45 o   |
| -1  | 21 | 4 | 68.89   | 25.75   | 31.48 <   |
| 0   | 21 | 4 | 0.03    | 5.72    | 14.31 <   |
| 1   | 21 | 4 | 106.64  | 71.54   | 22.89 o   |
| 2   | 21 | 4 | 82.32   | 57.23   | 20.03 <   |
| 3   | 21 | 4 | 84.39   | 88.71   | 22.89 o   |
| 4   | 21 | 4 | 354.23  | 389.17  | 51.51 o   |
| 5   | 21 | 4 | 34.73   | 42.92   | 22.89 <   |
| 6   | 21 | 4 | 5.33    | -8.58   | 22.89 <   |
| 7   | 21 | 4 | 1.89    | 8.58    | 14.31 <   |
| 8   | 21 | 4 | 16.41   | 5.72    | 14.31 <   |
| 9   | 21 | 4 | 0.00    | -2.86   | 14.31 <   |
| -9  | 22 | 4 | 609.28  | -11.45  | 22.89 <   |
| -8  | 22 | 4 | 78.31   | -5.72   | 22.89 <   |
| -7  | 22 | 4 | 1008.99 | -62.95  | 2017.37 < |
| -6  | 22 | 4 | 98.67   | 42.92   | 14.31 <   |
| -5  | 22 | 4 | 197.94  | 223.20  | 42.92 o   |
| -4  | 22 | 4 | 2133.56 | -80.12  | 3599.78 < |
| -2  | 22 | 4 | 13.27   | 8.58    | 14.31 <   |
| 0   | 22 | 4 | 496.92  | 203.17  | 42.92 o   |
| 1   | 22 | 4 | 1014.16 | 798.36  | 108.74 o  |
| 2   | 22 | 4 | 25.11   | 11.45   | 17.17 <   |
| 3   | 22 | 4 | 1244.66 | 1353.49 | 103.01 o  |
| 4   | 22 | 4 | 2243.78 | 2343.58 | 117.32 o  |
| 5   | 22 | 4 | 292.29  | 186.00  | 51.51 o   |
| 6   | 22 | 4 | 71.87   | 31.48   | 17.17 <   |
| 7   | 22 | 4 | 785.44  | 334.80  | 82.98 o   |
| 8   | 22 | 4 | 203.31  | 51.51   | 51.51 <   |
| 9   | 22 | 4 | 457.15  | 25.75   | 3699.93 < |
| -8  | 23 | 4 | 13.53   | -5.72   | 20.03 <   |
| -7  | 23 | 4 | 2.09    | 2.86    | 22.89 <   |
| -6  | 23 | 4 | 28.71   | 14.31   | 14.31 <   |
| -5  | 23 | 4 | 114.81  | 28.62   | 42.92 <   |
| -4  | 23 | 4 | 161.94  | 240.37  | 45.78 o   |

## paulkerrite.cif

|    |    |   |         |         |         |   |
|----|----|---|---------|---------|---------|---|
| -3 | 23 | 4 | 5.60    | 11.45   | 14.31   | < |
| -2 | 23 | 4 | 5.89    | 22.89   | 14.31   | < |
| -1 | 23 | 4 | 23.09   | 25.75   | 11.45   | < |
| 0  | 23 | 4 | 67.82   | 54.37   | 17.17   | o |
| 1  | 23 | 4 | 51.96   | 45.78   | 17.17   | < |
| 2  | 23 | 4 | 54.84   | 51.51   | 22.89   | < |
| 3  | 23 | 4 | 18.82   | 17.17   | 17.17   | < |
| 4  | 23 | 4 | 257.81  | 311.90  | 108.74  | < |
| 5  | 23 | 4 | 115.55  | 128.77  | 22.89   | o |
| 6  | 23 | 4 | 86.10   | 57.23   | 20.03   | < |
| 7  | 23 | 4 | 0.11    | -2.86   | 22.89   | < |
| 8  | 23 | 4 | 26.33   | 28.62   | 22.89   | < |
| -7 | 24 | 4 | 137.07  | 0.00    | 25.75   | < |
| -6 | 24 | 4 | 1786.79 | -8.58   | 2140.41 | < |
| -5 | 24 | 4 | 42.21   | 17.17   | 11.45   | < |
| -4 | 24 | 4 | 54.03   | 40.06   | 14.31   | < |
| -3 | 24 | 4 | 877.28  | -22.89  | 1115.99 | < |
| -2 | 24 | 4 | 1069.45 | -28.62  | 2724.16 | < |
| -1 | 24 | 4 | 160.29  | 160.24  | 28.62   | o |
| 0  | 24 | 4 | 2276.33 | 1427.89 | 160.24  | o |
| 1  | 24 | 4 | 195.80  | 97.29   | 25.75   | o |
| 2  | 24 | 4 | 713.31  | 818.39  | 71.54   | o |
| 3  | 24 | 4 | 900.12  | 1439.34 | 105.88  | o |
| 4  | 24 | 4 | 177.59  | 74.40   | 17.17   | o |
| 5  | 24 | 4 | 30.36   | 17.17   | 14.31   | < |
| 7  | 24 | 4 | 135.52  | 91.57   | 31.48   | < |
| -5 | 25 | 4 | 51.24   | 5.72    | 28.62   | < |
| -4 | 25 | 4 | 19.88   | 11.45   | 11.45   | < |
| -3 | 25 | 4 | 17.69   | 11.45   | 11.45   | < |
| -2 | 25 | 4 | 162.30  | 74.40   | 449.26  | < |
| -1 | 25 | 4 | 15.67   | 8.58    | 11.45   | < |
| 0  | 25 | 4 | 2.59    | 0.00    | 11.45   | < |
| 1  | 25 | 4 | 2.37    | 11.45   | 17.17   | < |
| 2  | 25 | 4 | 80.03   | 100.15  | 22.89   | o |
| 3  | 25 | 4 | 12.58   | 8.58    | 22.89   | < |
| 4  | 25 | 4 | 0.98    | 22.89   | 31.48   | < |
| 5  | 25 | 4 | 97.77   | 60.09   | 20.03   | < |
| 6  | 25 | 4 | 18.31   | 2.86    | 20.03   | < |
| 7  | 25 | 4 | 5.29    | 5.72    | 22.89   | < |
| -4 | 26 | 4 | 21.09   | -8.58   | 25.75   | < |
| -3 | 26 | 4 | 1285.21 | -42.92  | 3983.22 | < |
| -2 | 26 | 4 | 186.60  | -5.72   | 34.34   | < |
| -1 | 26 | 4 | 275.74  | 88.71   | 31.48   | < |
| 0  | 26 | 4 | 61.31   | 34.34   | 14.31   | < |
| 1  | 26 | 4 | 279.45  | 77.26   | 45.78   | < |
| 2  | 26 | 4 | 279.29  | 289.01  | 42.92   | o |
| 3  | 26 | 4 | 1266.17 | 1639.65 | 108.74  | o |
| 4  | 26 | 4 | 11.17   | 42.92   | 25.75   | < |
| 5  | 26 | 4 | 112.38  | 160.24  | 34.34   | o |
| 6  | 26 | 4 | 497.74  | 197.44  | 57.23   | o |
| -2 | 27 | 4 | 98.36   | 20.03   | 22.89   | < |
| -1 | 27 | 4 | 244.82  | -14.31  | 1041.59 | < |
| 0  | 27 | 4 | 2.04    | 11.45   | 14.31   | < |
| 1  | 27 | 4 | 278.80  | 188.86  | 60.09   | o |

## paulkerrite.cif

|     |    |   |          |          |           |
|-----|----|---|----------|----------|-----------|
| 2   | 27 | 4 | 39.33    | 91.57    | 31.48 <   |
| 3   | 27 | 4 | 1.54     | 0.00     | 25.75 <   |
| 4   | 27 | 4 | 13.43    | 5.72     | 22.89 <   |
| 5   | 27 | 4 | 89.03    | 137.35   | 37.20 o   |
| 6   | 27 | 4 | 0.00     | 8.58     | 37.20 <   |
| 1   | 28 | 4 | 49.97    | 17.17    | 17.17 <   |
| 2   | 28 | 4 | 89.70    | 77.26    | 34.34 <   |
| 3   | 28 | 4 | 781.51   | 1133.16  | 125.91 o  |
| 4   | 28 | 4 | 889.46   | 663.87   | 91.57 o   |
| 5   | 28 | 4 | 8.06     | 5.72     | 22.89 <   |
| -14 | 1  | 5 | 813.33   | 557.99   | 852.73 <  |
| -13 | 1  | 5 | 882.24   | 480.73   | 1290.54 < |
| -12 | 1  | 5 | 192.01   | 154.52   | 374.86 <  |
| -10 | 1  | 5 | 4.26     | 45.78    | 20.03 <   |
| -9  | 1  | 5 | 669.06   | 847.01   | 48.65 o   |
| -8  | 1  | 5 | 10838.80 | 13108.60 | 454.98 o  |
| -7  | 1  | 5 | 54.54    | 131.63   | 20.03 o   |
| -6  | 1  | 5 | 33.49    | 103.01   | 17.17 o   |
| -5  | 1  | 5 | 2829.55  | 2724.16  | 105.88 o  |
| -4  | 1  | 5 | 3390.48  | 3980.36  | 294.74 o  |
| -3  | 1  | 5 | 699.67   | 869.90   | 40.06 o   |
| -2  | 1  | 5 | 6133.57  | 5868.96  | 206.03 o  |
| -1  | 1  | 5 | 3247.01  | 3222.06  | 117.32 o  |
| 0   | 1  | 5 | 9.65     | 45.78    | 11.45 o   |
| 2   | 1  | 5 | 7092.86  | 7165.23  | 243.23 o  |
| 3   | 1  | 5 | 343.42   | 372.00   | 31.48 o   |
| 5   | 1  | 5 | 1385.40  | 1081.65  | 82.98 o   |
| 7   | 1  | 5 | 109.19   | 137.35   | 17.17 o   |
| 9   | 1  | 5 | 954.86   | -22.89   | 758.30 <  |
| 10  | 1  | 5 | 35.19    | 54.37    | 17.17 o   |
| 11  | 1  | 5 | 5575.51  | 661.01   | 2443.73 < |
| -14 | 2  | 5 | 91.59    | 22.89    | 60.09 <   |
| -13 | 2  | 5 | 48.42    | 17.17    | 17.17 <   |
| -12 | 2  | 5 | 140.49   | 94.43    | 20.03 o   |
| -10 | 2  | 5 | 4.66     | -5.72    | 14.31 <   |
| -8  | 2  | 5 | 7.41     | 2.86     | 17.17 <   |
| -7  | 2  | 5 | 154.98   | 148.80   | 20.03 o   |
| -6  | 2  | 5 | 608.10   | 569.44   | 34.34 o   |
| -5  | 2  | 5 | 894.10   | 958.61   | 45.78 o   |
| -4  | 2  | 5 | 543.59   | 580.89   | 48.65 o   |
| -2  | 2  | 5 | 691.16   | 892.79   | 45.78 o   |
| -1  | 2  | 5 | 8.09     | 17.17    | 14.31 <   |
| 0   | 2  | 5 | 645.45   | 703.93   | 31.48 o   |
| 1   | 2  | 5 | 31.87    | 51.51    | 11.45 o   |
| 2   | 2  | 5 | 465.24   | 632.39   | 28.62 o   |
| 4   | 2  | 5 | 659.54   | 537.96   | 208.89 <  |
| 5   | 2  | 5 | 281.88   | 194.58   | 20.03 o   |
| 6   | 2  | 5 | 724.00   | 635.26   | 40.06 o   |
| 7   | 2  | 5 | 514.39   | 443.53   | 340.52 <  |
| 8   | 2  | 5 | 0.01     | -25.75   | 291.87 <  |
| 9   | 2  | 5 | 7.15     | 17.17    | 48.65 <   |
| 10  | 2  | 5 | 5.64     | -14.31   | 14.31 <   |
| 11  | 2  | 5 | 32.42    | 31.48    | 14.31 <   |
| -14 | 3  | 5 | 335.87   | 231.78   | 663.87 <  |

## paulkerrite.cif

|     |   |   |          |          |           |
|-----|---|---|----------|----------|-----------|
| -13 | 3 | 5 | 240.04   | 114.46   | 1940.10 < |
| -12 | 3 | 5 | 39.57    | 103.01   | 25.75 o   |
| -11 | 3 | 5 | 119.27   | 206.03   | 25.75 o   |
| -10 | 3 | 5 | 1938.41  | 2314.96  | 97.29 o   |
| -9  | 3 | 5 | 52.02    | 42.92    | 17.17 <   |
| -8  | 3 | 5 | 12086.60 | 13672.30 | 483.60 o  |
| -7  | 3 | 5 | 6930.32  | 8209.68  | 291.87 o  |
| -6  | 3 | 5 | 4895.54  | 5167.89  | 188.86 o  |
| -5  | 3 | 5 | 23006.80 | 24998.20 | 849.87 o  |
| -4  | 3 | 5 | 2150.81  | 1745.52  | 71.54 o   |
| -2  | 3 | 5 | 15067.80 | 14974.30 | 726.82 o  |
| 0   | 3 | 5 | 131.93   | 100.15   | 14.31 o   |
| 1   | 3 | 5 | 764.13   | 952.88   | 40.06 o   |
| 2   | 3 | 5 | 14023.90 | 14473.50 | 492.18 o  |
| 4   | 3 | 5 | 1240.39  | 761.16   | 77.26 o   |
| 5   | 3 | 5 | 19829.70 | 19758.70 | 947.16 o  |
| 6   | 3 | 5 | 3238.41  | 2346.44  | 174.55 o  |
| 7   | 3 | 5 | 8372.25  | 8095.22  | 397.75 o  |
| 9   | 3 | 5 | 161.94   | -20.03   | 208.89 <  |
| 10  | 3 | 5 | 2316.36  | 0.00     | 1264.79 < |
| 11  | 3 | 5 | 114.53   | 125.91   | 28.62 o   |
| 13  | 3 | 5 | 355.54   | 11.45    | 28.62 <   |
| -14 | 4 | 5 | 0.19     | -11.45   | 14.31 <   |
| -13 | 4 | 5 | 21.07    | 34.34    | 20.03 <   |
| -12 | 4 | 5 | 70.12    | 57.23    | 17.17 o   |
| -11 | 4 | 5 | 35.72    | 62.95    | 17.17 o   |
| -10 | 4 | 5 | 0.90     | -8.58    | 14.31 <   |
| -9  | 4 | 5 | 34.72    | 11.45    | 14.31 <   |
| -8  | 4 | 5 | 181.87   | 177.41   | 25.75 o   |
| -7  | 4 | 5 | 51.17    | 45.78    | 14.31 o   |
| -6  | 4 | 5 | 1.98     | 8.58     | 11.45 <   |
| -5  | 4 | 5 | 51.95    | 82.98    | 17.17 o   |
| -4  | 4 | 5 | 14.75    | 40.06    | 14.31 <   |
| -3  | 4 | 5 | 568.73   | 515.07   | 31.48 o   |
| -2  | 4 | 5 | 1019.78  | 1236.17  | 60.09 o   |
| 0   | 4 | 5 | 92.24    | 111.60   | 14.31 o   |
| 1   | 4 | 5 | 144.80   | 157.38   | 14.31 o   |
| 2   | 4 | 5 | 946.77   | 784.05   | 34.34 o   |
| 4   | 4 | 5 | 153.40   | 77.26    | 22.89 o   |
| 5   | 4 | 5 | 282.51   | 231.78   | 25.75 o   |
| 6   | 4 | 5 | 0.47     | 0.00     | 8.58 <    |
| 7   | 4 | 5 | 4.22     | 2.86     | 14.31 <   |
| 8   | 4 | 5 | 360.60   | -20.03   | 180.27 <  |
| 9   | 4 | 5 | 50.44    | 42.92    | 20.03 <   |
| 10  | 4 | 5 | 0.77     | -2.86    | 14.31 <   |
| 11  | 4 | 5 | 11.45    | -5.72    | 20.03 <   |
| 12  | 4 | 5 | 54.50    | 0.00     | 22.89 <   |
| 13  | 4 | 5 | 3.31     | -5.72    | 14.31 <   |
| -14 | 5 | 5 | 266.56   | 414.92   | 68.68 o   |
| -13 | 5 | 5 | 45.07    | 60.09    | 20.03 <   |
| -12 | 5 | 5 | 260.54   | 377.72   | 37.20 o   |
| -11 | 5 | 5 | 8.21     | 0.00     | 14.31 <   |
| -10 | 5 | 5 | 1439.89  | 1716.91  | 71.54 o   |
| -9  | 5 | 5 | 19.22    | 11.45    | 14.31 <   |



## paulkerrite.cif

|     |   |   |          |          |           |
|-----|---|---|----------|----------|-----------|
| -8  | 5 | 5 | 563.98   | 784.05   | 54.37 o   |
| -7  | 5 | 5 | 2052.74  | 1920.07  | 74.40 o   |
| -6  | 5 | 5 | 242.18   | 188.86   | 20.03 o   |
| -5  | 5 | 5 | 19307.20 | 18843.10 | 649.56 o  |
| -4  | 5 | 5 | 9369.63  | 8773.39  | 277.57 o  |
| -3  | 5 | 5 | 12325.00 | 13546.40 | 540.83 o  |
| -2  | 5 | 5 | 12216.80 | 13689.50 | 543.69 o  |
| 0   | 5 | 5 | 141.85   | 125.91   | 14.31 o   |
| 1   | 5 | 5 | 503.76   | 540.83   | 28.62 o   |
| 2   | 5 | 5 | 13954.60 | 12012.60 | 578.03 o  |
| 5   | 5 | 5 | 15901.90 | 13629.40 | 661.01 o  |
| 6   | 5 | 5 | 30.55    | 34.34    | 14.31 <   |
| 8   | 5 | 5 | 1051.79  | 1364.94  | 120.18 o  |
| 9   | 5 | 5 | 64.06    | 20.03    | 14.31 <   |
| 10  | 5 | 5 | 1190.46  | 40.06    | 844.15 <  |
| 11  | 5 | 5 | 13.41    | 11.45    | 14.31 <   |
| 12  | 5 | 5 | 112.32   | 5.72     | 105.88 <  |
| 13  | 5 | 5 | 51.90    | -5.72    | 125.91 <  |
| -14 | 6 | 5 | 43.81    | 0.00     | 25.75 <   |
| -13 | 6 | 5 | 1.36     | 0.00     | 17.17 <   |
| -12 | 6 | 5 | 156.83   | 251.81   | 60.09 o   |
| -11 | 6 | 5 | 12.45    | 31.48    | 14.31 <   |
| -10 | 6 | 5 | 122.02   | 128.77   | 20.03 o   |
| -9  | 6 | 5 | 198.84   | 326.21   | 31.48 o   |
| -8  | 6 | 5 | 8.60     | 0.00     | 14.31 <   |
| -7  | 6 | 5 | 35.75    | 94.43    | 17.17 o   |
| -6  | 6 | 5 | 10.51    | 0.00     | 11.45 <   |
| -5  | 6 | 5 | 19.50    | 57.23    | 14.31 o   |
| -4  | 6 | 5 | 549.65   | 560.86   | 28.62 o   |
| -3  | 6 | 5 | 15.32    | 37.20    | 17.17 <   |
| -2  | 6 | 5 | 77.74    | 100.15   | 14.31 o   |
| -1  | 6 | 5 | 23.43    | 28.62    | 11.45 <   |
| 0   | 6 | 5 | 235.10   | 280.43   | 22.89 o   |
| 1   | 6 | 5 | 6.16     | 8.58     | 8.58 <    |
| 2   | 6 | 5 | 113.88   | 123.04   | 14.31 o   |
| 3   | 6 | 5 | 2.97     | 2.86     | 11.45 <   |
| 5   | 6 | 5 | 46.58    | 91.57    | 20.03 o   |
| 6   | 6 | 5 | 2.15     | 5.72     | 14.31 <   |
| 7   | 6 | 5 | 106.93   | 183.14   | 37.20 o   |
| 8   | 6 | 5 | 117.52   | -20.03   | 151.66 <  |
| 9   | 6 | 5 | 17.14    | 17.17    | 22.89 <   |
| 10  | 6 | 5 | 225.29   | -20.03   | 769.75 <  |
| 11  | 6 | 5 | 0.10     | 2.86     | 17.17 <   |
| 12  | 6 | 5 | 152.78   | -8.58    | 263.26 <  |
| 13  | 6 | 5 | 43.61    | 2.86     | 17.17 <   |
| -14 | 7 | 5 | 493.11   | -42.92   | 526.52 <  |
| -13 | 7 | 5 | 49.90    | 25.75    | 17.17 <   |
| -12 | 7 | 5 | 1401.78  | 995.81   | 1573.83 < |
| -11 | 7 | 5 | 137.81   | 77.26    | 17.17 o   |
| -10 | 7 | 5 | 513.55   | 566.58   | 37.20 o   |
| -9  | 7 | 5 | 1.83     | 14.31    | 17.17 <   |
| -8  | 7 | 5 | 485.77   | 394.89   | 31.48 o   |
| -7  | 7 | 5 | 4098.11  | 4120.58  | 140.21 o  |
| -6  | 7 | 5 | 40.61    | 94.43    | 14.31 o   |

## paulkerrite.cif

|     |   |   |          |          |         |   |
|-----|---|---|----------|----------|---------|---|
| -5  | 7 | 5 | 4067.06  | 5322.41  | 223.20  | o |
| -4  | 7 | 5 | 23945.30 | 23435.80 | 726.82  | o |
| -3  | 7 | 5 | 2830.33  | 3038.93  | 117.32  | o |
| -2  | 7 | 5 | 28033.90 | 28014.20 | 950.02  | o |
| 3   | 7 | 5 | 669.92   | 503.63   | 60.09   | o |
| 6   | 7 | 5 | 576.36   | 629.53   | 54.37   | o |
| 8   | 7 | 5 | 405.10   | -2.86    | 403.47  | < |
| 9   | 7 | 5 | 3.15     | 2.86     | 20.03   | < |
| 10  | 7 | 5 | 479.87   | -5.72    | 1030.14 | < |
| 11  | 7 | 5 | 208.60   | 5.72     | 606.64  | < |
| 12  | 7 | 5 | 1024.66  | 14.31    | 374.86  | < |
| 13  | 7 | 5 | 24.16    | -2.86    | 22.89   | < |
| -14 | 8 | 5 | 50.84    | -17.17   | 28.62   | < |
| -13 | 8 | 5 | 53.23    | 31.48    | 17.17   | < |
| -12 | 8 | 5 | 10.16    | 17.17    | 14.31   | < |
| -11 | 8 | 5 | 10.88    | 11.45    | 20.03   | < |
| -10 | 8 | 5 | 32.75    | 14.31    | 17.17   | < |
| -9  | 8 | 5 | 32.10    | 80.12    | 17.17   | o |
| -8  | 8 | 5 | 28.48    | 22.89    | 17.17   | < |
| -7  | 8 | 5 | 473.59   | 615.22   | 42.92   | o |
| -6  | 8 | 5 | 39.47    | 68.68    | 14.31   | o |
| -5  | 8 | 5 | 360.98   | 432.09   | 28.62   | o |
| -4  | 8 | 5 | 1.25     | 45.78    | 14.31   | o |
| -3  | 8 | 5 | 79.13    | 80.12    | 17.17   | o |
| -2  | 8 | 5 | 233.66   | 203.17   | 20.03   | o |
| -1  | 8 | 5 | 14.99    | 37.20    | 11.45   | o |
| 0   | 8 | 5 | 558.18   | 686.76   | 51.51   | o |
| 1   | 8 | 5 | 29.81    | 20.03    | 11.45   | < |
| 2   | 8 | 5 | 162.96   | 151.66   | 14.31   | o |
| 3   | 8 | 5 | 74.49    | 28.62    | 11.45   | < |
| 4   | 8 | 5 | 110.17   | 71.54    | 11.45   | o |
| 6   | 8 | 5 | 32.62    | 42.92    | 17.17   | < |
| 7   | 8 | 5 | 30.22    | 8.58     | 17.17   | < |
| 8   | 8 | 5 | 39.22    | 8.58     | 11.45   | < |
| 9   | 8 | 5 | 4.70     | 2.86     | 17.17   | < |
| 10  | 8 | 5 | 55.48    | 45.78    | 22.89   | < |
| 11  | 8 | 5 | 49.49    | 40.06    | 22.89   | < |
| 12  | 8 | 5 | 5.07     | 17.17    | 17.17   | < |
| -14 | 9 | 5 | 263.59   | -34.34   | 1974.44 | < |
| -13 | 9 | 5 | 774.08   | 297.60   | 62.95   | o |
| -12 | 9 | 5 | 182.64   | 160.24   | 31.48   | o |
| -11 | 9 | 5 | 1696.53  | 1081.65  | 268.98  | o |
| -10 | 9 | 5 | 1238.35  | 1093.10  | 240.37  | o |
| -9  | 9 | 5 | 147.92   | 186.00   | 25.75   | o |
| -8  | 9 | 5 | 791.81   | 766.89   | 123.04  | o |
| -7  | 9 | 5 | 218.92   | 260.40   | 28.62   | o |
| -6  | 9 | 5 | 798.45   | 758.30   | 154.52  | o |
| -5  | 9 | 5 | 408.52   | 351.97   | 34.34   | o |
| -4  | 9 | 5 | 9162.97  | 10639.10 | 374.86  | o |
| -3  | 9 | 5 | 124.64   | 145.94   | 17.17   | o |
| 0   | 9 | 5 | 69.30    | 42.92    | 11.45   | o |
| 1   | 9 | 5 | 10308.50 | 10868.00 | 383.44  | o |
| 2   | 9 | 5 | 11176.00 | 11883.90 | 480.73  | o |
| 3   | 9 | 5 | 291.20   | 188.86   | 20.03   | o |

## paulkerrite.cif

|     |    |   |         |         |         |   |
|-----|----|---|---------|---------|---------|---|
| 5   | 9  | 5 | 170.74  | 145.94  | 17.17   | o |
| 6   | 9  | 5 | 800.16  | 749.72  | 37.20   | o |
| 7   | 9  | 5 | 89.02   | 60.09   | 20.03   | < |
| 8   | 9  | 5 | 918.26  | 94.43   | 998.67  | < |
| 9   | 9  | 5 | 178.73  | 62.95   | 31.48   | < |
| 10  | 9  | 5 | 1345.94 | -20.03  | 709.66  | < |
| 11  | 9  | 5 | 1697.64 | -5.72   | 440.67  | < |
| 12  | 9  | 5 | 139.01  | 163.11  | 40.06   | o |
| -13 | 10 | 5 | 0.27    | -2.86   | 20.03   | < |
| -12 | 10 | 5 | 7.37    | 2.86    | 14.31   | < |
| -11 | 10 | 5 | 0.19    | -2.86   | 17.17   | < |
| -10 | 10 | 5 | 15.03   | 31.48   | 14.31   | < |
| -9  | 10 | 5 | 1.49    | 11.45   | 14.31   | < |
| -8  | 10 | 5 | 170.67  | 143.08  | 180.27  | < |
| -7  | 10 | 5 | 33.29   | 31.48   | 20.03   | < |
| -6  | 10 | 5 | 14.84   | 14.31   | 17.17   | < |
| -5  | 10 | 5 | 3.00    | 20.03   | 11.45   | < |
| -4  | 10 | 5 | 720.66  | 918.54  | 54.37   | o |
| -3  | 10 | 5 | 51.86   | 77.26   | 14.31   | o |
| -2  | 10 | 5 | 178.25  | 151.66  | 17.17   | o |
| -1  | 10 | 5 | 2.65    | 11.45   | 14.31   | < |
| 0   | 10 | 5 | 211.43  | 309.04  | 28.62   | o |
| 1   | 10 | 5 | 20.93   | 40.06   | 11.45   | o |
| 2   | 10 | 5 | 91.04   | 85.85   | 14.31   | o |
| 3   | 10 | 5 | 124.71  | 54.37   | 11.45   | o |
| 4   | 10 | 5 | 1065.61 | 764.02  | 57.23   | o |
| 5   | 10 | 5 | 13.95   | 14.31   | 203.17  | < |
| 6   | 10 | 5 | 22.76   | 11.45   | 11.45   | < |
| 7   | 10 | 5 | 1.44    | 11.45   | 11.45   | < |
| 8   | 10 | 5 | 336.16  | -17.17  | 400.61  | < |
| 9   | 10 | 5 | 2.19    | -2.86   | 14.31   | < |
| 10  | 10 | 5 | 6.74    | 2.86    | 20.03   | < |
| 11  | 10 | 5 | 7.87    | 20.03   | 31.48   | < |
| 12  | 10 | 5 | 3.45    | 5.72    | 34.34   | < |
| -13 | 11 | 5 | 614.42  | -37.20  | 40.06   | < |
| -12 | 11 | 5 | 1.92    | 8.58    | 14.31   | < |
| -11 | 11 | 5 | 4789.53 | 6412.65 | 277.57  | o |
| -10 | 11 | 5 | 1073.67 | 1021.56 | 65.81   | o |
| -9  | 11 | 5 | 1652.62 | 1991.61 | 88.71   | o |
| -8  | 11 | 5 | 3437.61 | 3702.80 | 143.08  | o |
| -7  | 11 | 5 | 2449.08 | 2520.99 | 103.01  | o |
| -6  | 11 | 5 | 1068.80 | 1064.48 | 108.74  | o |
| -5  | 11 | 5 | 1242.33 | 1279.10 | 60.09   | o |
| -4  | 11 | 5 | 1638.90 | 1940.10 | 82.98   | o |
| -3  | 11 | 5 | 84.36   | 492.18  | 151.66  | o |
| 0   | 11 | 5 | 23.77   | 25.75   | 17.17   | < |
| 1   | 11 | 5 | 9496.06 | 9560.31 | 386.30  | o |
| 2   | 11 | 5 | 2927.42 | 2400.81 | 131.63  | o |
| 5   | 11 | 5 | 2045.16 | 955.74  | 397.75  | < |
| 7   | 11 | 5 | 1852.72 | 1430.76 | 62.95   | o |
| 9   | 11 | 5 | 1870.22 | 188.86  | 3937.44 | < |
| 10  | 11 | 5 | 1388.83 | 1754.11 | 165.97  | o |
| 11  | 11 | 5 | 4409.89 | 168.83  | 872.76  | < |
| 12  | 11 | 5 | 12.21   | -2.86   | 22.89   | < |

## paulkerrite.cif

|     |    |   |         |         |           |
|-----|----|---|---------|---------|-----------|
| -13 | 12 | 5 | 48.10   | 5.72    | 28.62 <   |
| -12 | 12 | 5 | 100.82  | 0.00    | 174.55 <  |
| -11 | 12 | 5 | 7.12    | 0.00    | 17.17 <   |
| -10 | 12 | 5 | 143.77  | 80.12   | 22.89 o   |
| -9  | 12 | 5 | 8.19    | -2.86   | 14.31 <   |
| -8  | 12 | 5 | 4.27    | 11.45   | 11.45 <   |
| -7  | 12 | 5 | 741.37  | 718.24  | 120.18 o  |
| -6  | 12 | 5 | 786.54  | 921.41  | 51.51 o   |
| -5  | 12 | 5 | 18.87   | 111.60  | 22.89 o   |
| -4  | 12 | 5 | 1.23    | 11.45   | 11.45 <   |
| -3  | 12 | 5 | 494.74  | 612.36  | 51.51 o   |
| -2  | 12 | 5 | 294.48  | 257.54  | 28.62 o   |
| -1  | 12 | 5 | 20.42   | 34.34   | 11.45 o   |
| 0   | 12 | 5 | 667.21  | 635.26  | 51.51 o   |
| 1   | 12 | 5 | 28.18   | 34.34   | 14.31 <   |
| 2   | 12 | 5 | 549.50  | 432.09  | 40.06 o   |
| 3   | 12 | 5 | 768.17  | 303.32  | 120.18 <  |
| 4   | 12 | 5 | 34.40   | 20.03   | 17.17 <   |
| 5   | 12 | 5 | 115.36  | 40.06   | 25.75 <   |
| 6   | 12 | 5 | 529.82  | 326.21  | 68.68 o   |
| 7   | 12 | 5 | 286.89  | 174.55  | 25.75 o   |
| 8   | 12 | 5 | 12.52   | 8.58    | 11.45 <   |
| 9   | 12 | 5 | 31.64   | 25.75   | 14.31 <   |
| 10  | 12 | 5 | 193.40  | -25.75  | 1181.80 < |
| 11  | 12 | 5 | 36.86   | 22.89   | 25.75 <   |
| 12  | 12 | 5 | 136.18  | 45.78   | 28.62 <   |
| -13 | 13 | 5 | 339.69  | -22.89  | 1356.36 < |
| -12 | 13 | 5 | 191.61  | 85.85   | 31.48 <   |
| -11 | 13 | 5 | 581.27  | 2.86    | 2151.86 < |
| -10 | 13 | 5 | 12.75   | 20.03   | 17.17 <   |
| -9  | 13 | 5 | 1.09    | -2.86   | 14.31 <   |
| -8  | 13 | 5 | 5005.55 | 5525.58 | 289.01 o  |
| -7  | 13 | 5 | 1391.53 | 1138.88 | 82.98 o   |
| -6  | 13 | 5 | 5.27    | 5.72    | 25.75 <   |
| -5  | 13 | 5 | 4.26    | 45.78   | 20.03 <   |
| -4  | 13 | 5 | 2945.06 | 2363.61 | 211.75 o  |
| -2  | 13 | 5 | 4226.31 | 3634.12 | 140.21 o  |
| -1  | 13 | 5 | 1930.62 | 1682.57 | 77.26 o   |
| 0   | 13 | 5 | 16.46   | 17.17   | 11.45 <   |
| 1   | 13 | 5 | 3106.20 | 2452.32 | 137.35 o  |
| 5   | 13 | 5 | 260.79  | 31.48   | 22.89 <   |
| 6   | 13 | 5 | 57.95   | 48.65   | 14.31 o   |
| 8   | 13 | 5 | 4655.07 | 5911.88 | 291.87 o  |
| 9   | 13 | 5 | 2.18    | 2.86    | 11.45 <   |
| 10  | 13 | 5 | 4.24    | 14.31   | 22.89 <   |
| 11  | 13 | 5 | 594.94  | -48.65  | 5848.93 < |
| 12  | 13 | 5 | 95.64   | 14.31   | 1436.48 < |
| -12 | 14 | 5 | 112.99  | -14.31  | 37.20 <   |
| -11 | 14 | 5 | 37.65   | 17.17   | 20.03 <   |
| -10 | 14 | 5 | 133.10  | 62.95   | 37.20 <   |
| -9  | 14 | 5 | 10.70   | -2.86   | 17.17 <   |
| -8  | 14 | 5 | 45.88   | 25.75   | 125.91 <  |
| -7  | 14 | 5 | 3.28    | 14.31   | 17.17 <   |
| -6  | 14 | 5 | 168.13  | 62.95   | 22.89 <   |

## paulkerrite.cif

|     |    |   |         |         |         |   |
|-----|----|---|---------|---------|---------|---|
| -5  | 14 | 5 | 159.40  | 91.57   | 234.64  | < |
| -4  | 14 | 5 | 56.72   | 34.34   | 20.03   | < |
| -3  | 14 | 5 | 504.06  | 535.10  | 40.06   | o |
| -2  | 14 | 5 | 1392.15 | 1259.07 | 62.95   | o |
| -1  | 14 | 5 | 81.44   | 108.74  | 17.17   | o |
| 0   | 14 | 5 | 100.46  | 160.24  | 20.03   | o |
| 1   | 14 | 5 | 210.50  | 103.01  | 20.03   | o |
| 3   | 14 | 5 | 312.78  | 183.14  | 120.18  | < |
| 4   | 14 | 5 | 96.10   | 45.78   | 20.03   | < |
| 5   | 14 | 5 | 101.32  | 77.26   | 14.31   | o |
| 6   | 14 | 5 | 115.75  | 37.20   | 14.31   | < |
| 7   | 14 | 5 | 53.74   | 34.34   | 11.45   | o |
| 8   | 14 | 5 | 51.35   | 25.75   | 17.17   | < |
| 9   | 14 | 5 | 83.19   | 48.65   | 277.57  | < |
| 10  | 14 | 5 | 108.01  | 80.12   | 28.62   | < |
| 11  | 14 | 5 | 43.80   | 17.17   | 31.48   | < |
| 12  | 14 | 5 | 115.13  | 2.86    | 1719.77 | < |
| -12 | 15 | 5 | 62.81   | -5.72   | 28.62   | < |
| -11 | 15 | 5 | 498.97  | 45.78   | 48.65   | < |
| -10 | 15 | 5 | 58.44   | 94.43   | 34.34   | < |
| -9  | 15 | 5 | 210.00  | 82.98   | 28.62   | < |
| -6  | 15 | 5 | 108.06  | 51.51   | 17.17   | < |
| -4  | 15 | 5 | 341.73  | 220.34  | 34.34   | o |
| -3  | 15 | 5 | 2714.05 | 2801.42 | 137.35  | o |
| -1  | 15 | 5 | 8932.28 | 7892.05 | 326.21  | o |
| 0   | 15 | 5 | 2.56    | 8.58    | 11.45   | < |
| 1   | 15 | 5 | 7390.16 | 6003.45 | 309.04  | o |
| 3   | 15 | 5 | 2660.45 | 2063.15 | 105.88  | o |
| 4   | 15 | 5 | 147.54  | 105.88  | 22.89   | o |
| 6   | 15 | 5 | 7.58    | 11.45   | 25.75   | < |
| 8   | 15 | 5 | 3387.74 | 2904.43 | 137.35  | o |
| 9   | 15 | 5 | 196.58  | 131.63  | 34.34   | o |
| 10  | 15 | 5 | 143.78  | 48.65   | 583.75  | < |
| 11  | 15 | 5 | 436.63  | -42.92  | 1702.60 | < |
| 12  | 15 | 5 | 25.37   | -17.17  | 37.20   | < |
| -12 | 16 | 5 | 5.60    | -5.72   | 28.62   | < |
| -11 | 16 | 5 | 10.64   | -11.45  | 25.75   | < |
| -10 | 16 | 5 | 145.34  | 68.68   | 25.75   | < |
| -9  | 16 | 5 | 13.58   | 2.86    | 25.75   | < |
| -8  | 16 | 5 | 0.55    | -5.72   | 17.17   | < |
| -7  | 16 | 5 | 173.02  | 114.46  | 34.34   | o |
| -6  | 16 | 5 | 138.94  | 111.60  | 28.62   | o |
| -5  | 16 | 5 | 65.25   | 80.12   | 20.03   | o |
| -4  | 16 | 5 | 107.59  | 85.85   | 17.17   | o |
| -3  | 16 | 5 | 11.61   | 57.23   | 14.31   | o |
| -2  | 16 | 5 | 0.31    | 8.58    | 11.45   | < |
| -1  | 16 | 5 | 1.83    | 8.58    | 11.45   | < |
| 0   | 16 | 5 | 2934.77 | 2938.77 | 165.97  | o |
| 1   | 16 | 5 | 1.93    | 5.72    | 11.45   | < |
| 2   | 16 | 5 | 3.56    | 17.17   | 14.31   | < |
| 3   | 16 | 5 | 124.17  | 111.60  | 28.62   | o |
| 4   | 16 | 5 | 109.69  | 60.09   | 17.17   | o |
| 5   | 16 | 5 | 10.37   | 17.17   | 14.31   | < |
| 6   | 16 | 5 | 252.27  | 214.61  | 25.75   | o |

## paulkerrite.cif

|     |    |   |         |         |           |
|-----|----|---|---------|---------|-----------|
| 7   | 16 | 5 | 19.12   | 22.89   | 60.09 <   |
| 8   | 16 | 5 | 1.39    | 0.00    | 14.31 <   |
| 9   | 16 | 5 | 180.83  | 20.03   | 28.62 <   |
| 10  | 16 | 5 | 124.29  | 57.23   | 17.17 o   |
| 11  | 16 | 5 | 12.51   | 22.89   | 28.62 <   |
| 12  | 16 | 5 | 1.38    | -5.72   | 25.75 <   |
| -11 | 17 | 5 | 68.40   | -17.17  | 25.75 <   |
| -10 | 17 | 5 | 469.83  | 34.34   | 40.06 <   |
| -9  | 17 | 5 | 7.93    | 17.17   | 17.17 <   |
| -8  | 17 | 5 | 3657.60 | 887.07  | 858.45 <  |
| -7  | 17 | 5 | 1366.08 | 1018.70 | 85.85 o   |
| -6  | 17 | 5 | 633.68  | 231.78  | 188.86 <  |
| -4  | 17 | 5 | 131.35  | 60.09   | 14.31 o   |
| 0   | 17 | 5 | 69.05   | 28.62   | 14.31 <   |
| 2   | 17 | 5 | 1068.51 | 1216.14 | 91.57 o   |
| 3   | 17 | 5 | 864.92  | 557.99  | 60.09 o   |
| 4   | 17 | 5 | 132.11  | 71.54   | 20.03 o   |
| 5   | 17 | 5 | 3787.79 | 3296.46 | 180.27 o  |
| 9   | 17 | 5 | 0.27    | 0.00    | 11.45 <   |
| 10  | 17 | 5 | 401.28  | -22.89  | 844.15 <  |
| 11  | 17 | 5 | 80.67   | 51.51   | 34.34 <   |
| 12  | 17 | 5 | 18.98   | 0.00    | 25.75 <   |
| -11 | 18 | 5 | 0.62    | 5.72    | 31.48 <   |
| -10 | 18 | 5 | 52.31   | -28.62  | 140.21 <  |
| -9  | 18 | 5 | 22.36   | 20.03   | 17.17 <   |
| -8  | 18 | 5 | 29.37   | 31.48   | 17.17 <   |
| -7  | 18 | 5 | 0.33    | 0.00    | 22.89 <   |
| -6  | 18 | 5 | 8.69    | 8.58    | 14.31 <   |
| -5  | 18 | 5 | 33.63   | 22.89   | 34.34 <   |
| -4  | 18 | 5 | 720.93  | 486.46  | 85.85 o   |
| -3  | 18 | 5 | 21.06   | 28.62   | 11.45 <   |
| -2  | 18 | 5 | 154.41  | 91.57   | 17.17 o   |
| -1  | 18 | 5 | 21.82   | 37.20   | 11.45 o   |
| 0   | 18 | 5 | 21.10   | 20.03   | 11.45 <   |
| 1   | 18 | 5 | 106.97  | 31.48   | 14.31 <   |
| 2   | 18 | 5 | 74.46   | 68.68   | 17.17 o   |
| 3   | 18 | 5 | 14.31   | 20.03   | 14.31 <   |
| 4   | 18 | 5 | 724.67  | 555.13  | 82.98 o   |
| 5   | 18 | 5 | 10.16   | 8.58    | 40.06 <   |
| 6   | 18 | 5 | 5.23    | 14.31   | 14.31 <   |
| 7   | 18 | 5 | 52.62   | 22.89   | 14.31 <   |
| 8   | 18 | 5 | 0.55    | 2.86    | 14.31 <   |
| 9   | 18 | 5 | 1.01    | 5.72    | 11.45 <   |
| 10  | 18 | 5 | 103.54  | -5.72   | 226.06 <  |
| 11  | 18 | 5 | 0.00    | 8.58    | 22.89 <   |
| -10 | 19 | 5 | 336.44  | -54.37  | 1487.99 < |
| -9  | 19 | 5 | 105.33  | 34.34   | 22.89 <   |
| -8  | 19 | 5 | 264.94  | 94.43   | 34.34 <   |
| -7  | 19 | 5 | 346.12  | 168.83  | 40.06 o   |
| -6  | 19 | 5 | 208.67  | 77.26   | 45.78 <   |
| -5  | 19 | 5 | 80.23   | 111.60  | 20.03 o   |
| -3  | 19 | 5 | 57.65   | 40.06   | 14.31 <   |
| -1  | 19 | 5 | 2297.50 | 1951.55 | 128.77 o  |
| 0   | 19 | 5 | 3.68    | 8.58    | 14.31 <   |

## paulkerrite.cif

|     |    |   |         |         |         |   |
|-----|----|---|---------|---------|---------|---|
| 1   | 19 | 5 | 2635.05 | 520.79  | 423.50  | < |
| 3   | 19 | 5 | 15.65   | 34.34   | 17.17   | < |
| 4   | 19 | 5 | 1869.16 | 2252.01 | 143.08  | o |
| 5   | 19 | 5 | 190.46  | 100.15  | 42.92   | < |
| 6   | 19 | 5 | 69.93   | 48.65   | 14.31   | o |
| 7   | 19 | 5 | 197.45  | 85.85   | 51.51   | < |
| 8   | 19 | 5 | 263.80  | 111.60  | 163.11  | < |
| 9   | 19 | 5 | 97.22   | 40.06   | 17.17   | < |
| 10  | 19 | 5 | 373.51  | -28.62  | 123.04  | < |
| 11  | 19 | 5 | 381.12  | -140.21 | 1834.23 | < |
| -10 | 20 | 5 | 0.54    | -2.86   | 31.48   | < |
| -9  | 20 | 5 | 21.32   | -8.58   | 31.48   | < |
| -8  | 20 | 5 | 51.56   | 5.72    | 17.17   | < |
| -7  | 20 | 5 | 4.21    | 2.86    | 14.31   | < |
| -6  | 20 | 5 | 60.73   | 77.26   | 20.03   | o |
| -5  | 20 | 5 | 136.71  | -17.17  | 1075.93 | < |
| -4  | 20 | 5 | 0.03    | 0.00    | 14.31   | < |
| -3  | 20 | 5 | 52.38   | 37.20   | 14.31   | < |
| -2  | 20 | 5 | 78.76   | 42.92   | 14.31   | < |
| -1  | 20 | 5 | 104.79  | 8.58    | 20.03   | < |
| 1   | 20 | 5 | 48.37   | 22.89   | 20.03   | < |
| 2   | 20 | 5 | 48.05   | 42.92   | 17.17   | < |
| 3   | 20 | 5 | 213.26  | 134.49  | 171.69  | < |
| 4   | 20 | 5 | 5.38    | 0.00    | 37.20   | < |
| 5   | 20 | 5 | 37.04   | 40.06   | 22.89   | < |
| 6   | 20 | 5 | 33.05   | 25.75   | 17.17   | < |
| 7   | 20 | 5 | 0.23    | 5.72    | 17.17   | < |
| 8   | 20 | 5 | 84.14   | 51.51   | 20.03   | < |
| 9   | 20 | 5 | 60.53   | 34.34   | 20.03   | < |
| 10  | 20 | 5 | 2.96    | 0.00    | 17.17   | < |
| -9  | 21 | 5 | 80.55   | 5.72    | 25.75   | < |
| -8  | 21 | 5 | 35.93   | 8.58    | 17.17   | < |
| -7  | 21 | 5 | 560.78  | -25.75  | 337.66  | < |
| -6  | 21 | 5 | 8.43    | 17.17   | 14.31   | < |
| -5  | 21 | 5 | 612.63  | 211.75  | 134.49  | < |
| -3  | 21 | 5 | 689.14  | 45.78   | 735.41  | < |
| -2  | 21 | 5 | 1514.55 | -57.23  | 446.40  | < |
| 0   | 21 | 5 | 6.49    | 8.58    | 11.45   | < |
| 2   | 21 | 5 | 1589.74 | 1591.00 | 108.74  | o |
| 3   | 21 | 5 | 209.63  | 294.74  | 37.20   | o |
| 5   | 21 | 5 | 403.80  | 417.78  | 40.06   | o |
| 6   | 21 | 5 | 16.89   | 17.17   | 14.31   | < |
| 7   | 21 | 5 | 719.99  | 652.42  | 51.51   | o |
| 8   | 21 | 5 | 28.99   | 5.72    | 14.31   | < |
| 9   | 21 | 5 | 176.88  | 31.48   | 20.03   | < |
| -8  | 22 | 5 | 36.54   | 5.72    | 25.75   | < |
| -7  | 22 | 5 | 50.91   | 48.65   | 20.03   | < |
| -6  | 22 | 5 | 0.15    | 0.00    | 14.31   | < |
| -5  | 22 | 5 | 20.30   | 17.17   | 11.45   | < |
| -3  | 22 | 5 | 35.62   | 25.75   | 14.31   | < |
| -1  | 22 | 5 | 60.59   | 34.34   | 14.31   | < |
| 0   | 22 | 5 | 1.01    | -2.86   | 11.45   | < |
| 1   | 22 | 5 | 135.46  | 62.95   | 22.89   | < |
| 2   | 22 | 5 | 400.08  | 220.34  | 2008.78 | < |

## paulkerrite.cif

|    |    |   |         |         |           |
|----|----|---|---------|---------|-----------|
| 3  | 22 | 5 | 18.47   | 20.03   | 28.62 <   |
| 4  | 22 | 5 | 299.61  | 403.47  | 68.68 o   |
| 5  | 22 | 5 | 1.88    | 11.45   | 14.31 <   |
| 6  | 22 | 5 | 0.51    | 0.00    | 14.31 <   |
| 7  | 22 | 5 | 128.54  | 51.51   | 25.75 <   |
| 8  | 22 | 5 | 30.74   | 11.45   | 14.31 <   |
| -7 | 23 | 5 | 43.39   | 2.86    | 25.75 <   |
| -6 | 23 | 5 | 212.92  | 495.04  | 71.54 o   |
| -5 | 23 | 5 | 23.52   | 5.72    | 11.45 <   |
| -4 | 23 | 5 | 946.97  | 0.00    | 703.93 <  |
| -3 | 23 | 5 | 7.54    | 17.17   | 11.45 <   |
| 0  | 23 | 5 | 9.45    | 11.45   | 11.45 <   |
| 1  | 23 | 5 | 2657.78 | 2812.87 | 257.54 o  |
| 2  | 23 | 5 | 1060.26 | 437.81  | 1940.10 < |
| 3  | 23 | 5 | 36.78   | 34.34   | 17.17 <   |
| 4  | 23 | 5 | 820.60  | 981.50  | 80.12 o   |
| 5  | 23 | 5 | 57.77   | 28.62   | 20.03 <   |
| 6  | 23 | 5 | 116.60  | 100.15  | 22.89 o   |
| 7  | 23 | 5 | 15.76   | 8.58    | 14.31 <   |
| -6 | 24 | 5 | 324.11  | -14.31  | 31.48 <   |
| -5 | 24 | 5 | 0.87    | 2.86    | 11.45 <   |
| -4 | 24 | 5 | 1.40    | 11.45   | 11.45 <   |
| -3 | 24 | 5 | 13.08   | 5.72    | 11.45 <   |
| -2 | 24 | 5 | 76.50   | 157.38  | 42.92 o   |
| -1 | 24 | 5 | 0.28    | 0.00    | 14.31 <   |
| 0  | 24 | 5 | 76.08   | 42.92   | 17.17 <   |
| 1  | 24 | 5 | 0.57    | 5.72    | 11.45 <   |
| 2  | 24 | 5 | 128.29  | 74.40   | 22.89 o   |
| 3  | 24 | 5 | 31.22   | 17.17   | 17.17 <   |
| 4  | 24 | 5 | 35.78   | 25.75   | 22.89 <   |
| 5  | 24 | 5 | 1.36    | 5.72    | 14.31 <   |
| 6  | 24 | 5 | 258.16  | 22.89   | 62.95 <   |
| 7  | 24 | 5 | 82.03   | 62.95   | 42.92 <   |
| -4 | 25 | 5 | 336.72  | -22.89  | 929.99 <  |
| -3 | 25 | 5 | 43.15   | 28.62   | 11.45 <   |
| -2 | 25 | 5 | 502.92  | -25.75  | 1570.97 < |
| -1 | 25 | 5 | 85.00   | 54.37   | 14.31 o   |
| 0  | 25 | 5 | 7.11    | 0.00    | 11.45 <   |
| 1  | 25 | 5 | 11.89   | 28.62   | 17.17 <   |
| 2  | 25 | 5 | 501.18  | 463.57  | 57.23 o   |
| 3  | 25 | 5 | 131.99  | 85.85   | 337.66 <  |
| 4  | 25 | 5 | 342.49  | 369.14  | 48.65 o   |
| 5  | 25 | 5 | 504.03  | 632.39  | 88.71 o   |
| 6  | 25 | 5 | 21.66   | 2.86    | 25.75 <   |
| -2 | 26 | 5 | 75.98   | -8.58   | 14.31 <   |
| -1 | 26 | 5 | 37.99   | 8.58    | 14.31 <   |
| 0  | 26 | 5 | 72.83   | -11.45  | 20.03 <   |
| 1  | 26 | 5 | 56.25   | 20.03   | 14.31 <   |
| 2  | 26 | 5 | 37.07   | 28.62   | 17.17 <   |
| 3  | 26 | 5 | 79.97   | 174.55  | 37.20 o   |
| 4  | 26 | 5 | 71.81   | 137.35  | 34.34 o   |
| 5  | 26 | 5 | 105.00  | 108.74  | 34.34 o   |
| -1 | 27 | 5 | 1061.88 | -14.31  | 715.38 <  |
| 0  | 27 | 5 | 0.70    | 0.00    | 14.31 <   |



## paulkerrite.cif

|     |    |   |           |           |         |   |
|-----|----|---|-----------|-----------|---------|---|
| 1   | 27 | 5 | 627.99    | 105.88    | 1499.43 | < |
| 2   | 27 | 5 | 576.41    | 211.75    | 180.27  | < |
| 3   | 27 | 5 | 237.12    | 326.21    | 194.58  | < |
| 4   | 27 | 5 | 111.43    | 140.21    | 34.34   | o |
| 5   | 27 | 5 | 2167.40   | 2469.48   | 246.09  | o |
| 1   | 28 | 5 | 16.64     | 2.86      | 14.31   | < |
| 2   | 28 | 5 | 0.39      | -2.86     | 14.31   | < |
| 3   | 28 | 5 | 13.99     | 5.72      | 14.31   | < |
| 4   | 28 | 5 | 17.89     | 14.31     | 17.17   | < |
| -14 | 0  | 6 | 249.00    | 286.15    | 57.23   | o |
| -13 | 0  | 6 | 1402.65   | 1928.66   | 191.72  | o |
| -12 | 0  | 6 | 312.99    | -17.17    | 1290.54 | < |
| -11 | 0  | 6 | 51.90     | 154.52    | 34.34   | o |
| -10 | 0  | 6 | 29.75     | 48.65     | 28.62   | < |
| -9  | 0  | 6 | 3059.52   | 3865.90   | 211.75  | o |
| -8  | 0  | 6 | 672.75    | 703.93    | 60.09   | o |
| -6  | 0  | 6 | 3246.88   | 3780.06   | 200.31  | o |
| -3  | 0  | 6 | 77840.60  | 82282.80  | 5531.30 | o |
| -1  | 0  | 6 | 3452.71   | 4257.93   | 214.61  | o |
| 0   | 0  | 6 | 162846.00 | 175485.00 | 8312.69 | o |
| 1   | 0  | 6 | 3266.73   | 3445.26   | 171.69  | o |
| 2   | 0  | 6 | 4003.92   | 4117.71   | 203.17  | o |
| 3   | 0  | 6 | 62341.10  | 56875.40  | 2704.13 | o |
| 4   | 0  | 6 | 296.17    | 240.37    | 20.03   | o |
| -14 | 1  | 6 | 0.69      | 28.62     | 25.75   | < |
| -13 | 1  | 6 | 2.15      | 2.86      | 14.31   | < |
| -12 | 1  | 6 | 68.96     | 68.68     | 20.03   | o |
| -11 | 1  | 6 | 3.43      | 0.00      | 14.31   | < |
| -10 | 1  | 6 | 186.80    | 246.09    | 34.34   | o |
| -9  | 1  | 6 | 292.66    | 457.84    | 40.06   | o |
| -8  | 1  | 6 | 308.27    | 354.83    | 31.48   | o |
| -7  | 1  | 6 | 49.00     | 51.51     | 17.17   | < |
| -6  | 1  | 6 | 228.44    | 289.01    | 25.75   | o |
| -5  | 1  | 6 | 462.79    | 449.26    | 31.48   | o |
| -4  | 1  | 6 | 131.23    | 240.37    | 22.89   | o |
| -3  | 1  | 6 | 3.49      | 62.95     | 22.89   | < |
| -2  | 1  | 6 | 1691.69   | 1676.85   | 65.81   | o |
| 1   | 1  | 6 | 991.79    | 1018.70   | 40.06   | o |
| 3   | 1  | 6 | 71.04     | 62.95     | 14.31   | o |
| 4   | 1  | 6 | 146.27    | 65.81     | 20.03   | o |
| 5   | 1  | 6 | 342.57    | 297.60    | 20.03   | o |
| -14 | 2  | 6 | 262.76    | 223.20    | 54.37   | o |
| -13 | 2  | 6 | 20.88     | 17.17     | 14.31   | < |
| -12 | 2  | 6 | 291.39    | 268.98    | 45.78   | o |
| -11 | 2  | 6 | 19.55     | 62.95     | 20.03   | o |
| -9  | 2  | 6 | 65.65     | 68.68     | 20.03   | o |
| -8  | 2  | 6 | 5060.09   | 6464.15   | 234.64  | o |
| -7  | 2  | 6 | 166.77    | 180.27    | 22.89   | o |
| -6  | 2  | 6 | 1578.07   | 1765.55   | 74.40   | o |
| -5  | 2  | 6 | 2176.83   | 2163.30   | 103.01  | o |
| -4  | 2  | 6 | 39170.00  | 40161.30  | 1356.36 | o |
| -3  | 2  | 6 | 29.53     | 48.65     | 22.89   | < |
| -2  | 2  | 6 | 46236.70  | 48024.80  | 1616.75 | o |
| -1  | 2  | 6 | 440.42    | 331.93    | 25.75   | o |

## paulkerrite.cif

|     |   |   |          |          |         |   |
|-----|---|---|----------|----------|---------|---|
| 0   | 2 | 6 | 9485.28  | 9806.40  | 337.66  | o |
| 1   | 2 | 6 | 859.71   | 718.24   | 31.48   | o |
| 2   | 2 | 6 | 46088.50 | 49515.60 | 1662.54 | o |
| 3   | 2 | 6 | 10.81    | 25.75    | 5.72    | o |
| 5   | 2 | 6 | 1577.64  | 1287.68  | 68.68   | o |
| 6   | 2 | 6 | 1782.64  | 1487.99  | 80.12   | o |
| 7   | 2 | 6 | 278.20   | 234.64   | 20.03   | o |
| 8   | 2 | 6 | 6851.66  | 6578.62  | 317.63  | o |
| 9   | 2 | 6 | 143.69   | 168.83   | 51.51   | o |
| -14 | 3 | 6 | 143.49   | 163.11   | 48.65   | o |
| -13 | 3 | 6 | 52.24    | 22.89    | 17.17   | < |
| -12 | 3 | 6 | 443.61   | 569.44   | 54.37   | o |
| -11 | 3 | 6 | 112.52   | 154.52   | 25.75   | o |
| -10 | 3 | 6 | 293.02   | 400.61   | 34.34   | o |
| -9  | 3 | 6 | 0.09     | 11.45    | 11.45   | < |
| -8  | 3 | 6 | 70.03    | 77.26    | 17.17   | o |
| -7  | 3 | 6 | 82.78    | 51.51    | 17.17   | < |
| -6  | 3 | 6 | 176.58   | 260.40   | 25.75   | o |
| -5  | 3 | 6 | 21.75    | 5.72     | 14.31   | < |
| -4  | 3 | 6 | 222.33   | 163.11   | 20.03   | o |
| -2  | 3 | 6 | 1250.43  | 1370.66  | 57.23   | o |
| -1  | 3 | 6 | 1310.36  | 1427.89  | 65.81   | o |
| 0   | 3 | 6 | 13.10    | 17.17    | 11.45   | < |
| 1   | 3 | 6 | 1647.74  | 1596.72  | 62.95   | o |
| 2   | 3 | 6 | 595.51   | 706.79   | 37.20   | o |
| 4   | 3 | 6 | 152.26   | 65.81    | 14.31   | o |
| 5   | 3 | 6 | 14.32    | 17.17    | 11.45   | < |
| 6   | 3 | 6 | 30.71    | 8.58     | 8.58    | < |
| 7   | 3 | 6 | 32.39    | 17.17    | 14.31   | < |
| 8   | 3 | 6 | 99.82    | 80.12    | 17.17   | o |
| 9   | 3 | 6 | 0.03     | -8.58    | 186.00  | < |
| 10  | 3 | 6 | 142.69   | 82.98    | 20.03   | o |
| 11  | 3 | 6 | 168.52   | 37.20    | 42.92   | < |
| -14 | 4 | 6 | 3.90     | 5.72     | 28.62   | < |
| -13 | 4 | 6 | 702.22   | -186.00  | 6298.19 | < |
| -12 | 4 | 6 | 2774.68  | 3857.32  | 924.27  | o |
| -11 | 4 | 6 | 56.50    | 77.26    | 22.89   | o |
| -10 | 4 | 6 | 629.52   | 784.05   | 45.78   | o |
| -9  | 4 | 6 | 3215.21  | 4023.29  | 140.21  | o |
| -8  | 4 | 6 | 1.22     | 5.72     | 14.31   | < |
| -7  | 4 | 6 | 506.41   | 454.98   | 34.34   | o |
| -6  | 4 | 6 | 6136.95  | 7571.56  | 271.84  | o |
| -5  | 4 | 6 | 248.20   | 331.93   | 25.75   | o |
| -4  | 4 | 6 | 13767.30 | 17589.70 | 701.07  | o |
| -3  | 4 | 6 | 16703.40 | 17664.10 | 603.78  | o |
| -2  | 4 | 6 | 2882.69  | 2729.88  | 120.18  | o |
| 0   | 4 | 6 | 48424.00 | 54795.10 | 1865.71 | o |
| 1   | 4 | 6 | 5.71     | 25.75    | 8.58    | < |
| 2   | 4 | 6 | 1695.61  | 1530.91  | 60.09   | o |
| 3   | 4 | 6 | 15844.80 | 12899.70 | 875.62  | o |
| 7   | 4 | 6 | 1038.13  | 875.62   | 60.09   | o |
| 8   | 4 | 6 | 246.91   | 200.31   | 25.75   | o |
| 9   | 4 | 6 | 2717.16  | 2478.07  | 140.21  | o |
| 10  | 4 | 6 | 189.34   | 77.26    | 65.81   | < |

## paulkerrite.cif

|     |   |   |          |          |           |
|-----|---|---|----------|----------|-----------|
| 11  | 4 | 6 | 187.43   | 88.71    | 40.06 <   |
| -14 | 5 | 6 | 39.18    | 0.00     | 25.75 <   |
| -13 | 5 | 6 | 11.51    | 14.31    | 17.17 <   |
| -12 | 5 | 6 | 97.23    | 171.69   | 31.48 o   |
| -11 | 5 | 6 | 106.23   | 128.77   | 28.62 o   |
| -10 | 5 | 6 | 411.58   | 497.90   | 34.34 o   |
| -9  | 5 | 6 | 3.21     | 8.58     | 14.31 <   |
| -8  | 5 | 6 | 170.98   | 183.14   | 25.75 o   |
| -7  | 5 | 6 | 235.91   | 369.14   | 34.34 o   |
| -6  | 5 | 6 | 286.17   | 320.49   | 25.75 o   |
| -5  | 5 | 6 | 51.45    | 51.51    | 14.31 o   |
| -4  | 5 | 6 | 54.45    | 85.85    | 17.17 o   |
| -3  | 5 | 6 | 415.77   | 517.93   | 28.62 o   |
| -2  | 5 | 6 | 1078.94  | 1196.11  | 54.37 o   |
| -1  | 5 | 6 | 1164.38  | 1133.16  | 57.23 o   |
| 0   | 5 | 6 | 175.16   | 277.57   | 20.03 o   |
| 3   | 5 | 6 | 663.22   | 640.98   | 37.20 o   |
| 4   | 5 | 6 | 39.34    | 42.92    | 17.17 <   |
| 6   | 5 | 6 | 1.91     | 2.86     | 11.45 <   |
| 7   | 5 | 6 | 459.38   | 592.33   | 45.78 o   |
| 8   | 5 | 6 | 72.81    | 65.81    | 20.03 o   |
| 9   | 5 | 6 | 0.45     | -2.86    | 20.03 <   |
| 10  | 5 | 6 | 499.51   | 397.75   | 105.88 o  |
| 11  | 5 | 6 | 202.00   | 188.86   | 31.48 o   |
| 12  | 5 | 6 | 35.11    | 14.31    | 31.48 <   |
| -13 | 6 | 6 | 714.53   | 1301.99  | 125.91 o  |
| -12 | 6 | 6 | 44.24    | 25.75    | 17.17 <   |
| -11 | 6 | 6 | 87.48    | 123.04   | 22.89 o   |
| -9  | 6 | 6 | 930.17   | 1104.54  | 51.51 o   |
| -7  | 6 | 6 | 546.75   | 658.15   | 54.37 o   |
| -6  | 6 | 6 | 606.80   | 675.32   | 40.06 o   |
| -5  | 6 | 6 | 4192.62  | 4303.71  | 145.94 o  |
| -4  | 6 | 6 | 24830.60 | 23756.30 | 815.53 o  |
| -3  | 6 | 6 | 843.55   | 652.42   | 34.34 o   |
| -2  | 6 | 6 | 46465.90 | 52053.80 | 1765.55 o |
| -1  | 6 | 6 | 1856.80  | 1668.26  | 68.68 o   |
| 0   | 6 | 6 | 14767.50 | 16531.00 | 509.35 o  |
| 3   | 6 | 6 | 1018.67  | 869.90   | 51.51 o   |
| 4   | 6 | 6 | 21238.00 | 21558.60 | 1490.85 o |
| 6   | 6 | 6 | 145.74   | 62.95    | 22.89 <   |
| 8   | 6 | 6 | 2635.51  | 2841.48  | 157.38 o  |
| 9   | 6 | 6 | 1414.89  | 1304.85  | 85.85 o   |
| 11  | 6 | 6 | 0.01     | 31.48    | 31.48 <   |
| 12  | 6 | 6 | 0.04     | 5.72     | 17.17 <   |
| -13 | 7 | 6 | 8.58     | 14.31    | 22.89 <   |
| -12 | 7 | 6 | 20.17    | 25.75    | 17.17 <   |
| -11 | 7 | 6 | 45.24    | 34.34    | 17.17 <   |
| -10 | 7 | 6 | 38.76    | 31.48    | 14.31 <   |
| -9  | 7 | 6 | 153.97   | 180.27   | 22.89 o   |
| -8  | 7 | 6 | 60.87    | 105.88   | 22.89 o   |
| -7  | 7 | 6 | 178.64   | 194.58   | 22.89 o   |
| -6  | 7 | 6 | 9.69     | 28.62    | 14.31 <   |
| -5  | 7 | 6 | 129.38   | 123.04   | 17.17 o   |
| -4  | 7 | 6 | 937.27   | 1053.04  | 48.65 o   |

## paulkerrite.cif

|     |   |   |          |          |          |
|-----|---|---|----------|----------|----------|
| -3  | 7 | 6 | 34.65    | 74.40    | 14.31 o  |
| -2  | 7 | 6 | 625.56   | 738.27   | 34.34 o  |
| -1  | 7 | 6 | 354.17   | 349.10   | 22.89 o  |
| 1   | 7 | 6 | 241.33   | 280.43   | 22.89 o  |
| 2   | 7 | 6 | 364.85   | 460.70   | 37.20 o  |
| 3   | 7 | 6 | 4.13     | 11.45    | 8.58 <   |
| 4   | 7 | 6 | 978.75   | 975.78   | 74.40 o  |
| 5   | 7 | 6 | 249.39   | 137.35   | 31.48 o  |
| 6   | 7 | 6 | 46.13    | 22.89    | 14.31 <  |
| 7   | 7 | 6 | 280.14   | 317.63   | 37.20 o  |
| 8   | 7 | 6 | 60.99    | 68.68    | 31.48 <  |
| 9   | 7 | 6 | 283.03   | 397.75   | 45.78 o  |
| 10  | 7 | 6 | 67.33    | 34.34    | 20.03 <  |
| 11  | 7 | 6 | 132.64   | 177.41   | 31.48 o  |
| 12  | 7 | 6 | 15.32    | 2.86     | 17.17 <  |
| -13 | 8 | 6 | 59.79    | 31.48    | 22.89 <  |
| -12 | 8 | 6 | 1637.16  | 2094.63  | 100.15 o |
| -11 | 8 | 6 | 74.53    | 114.46   | 31.48 o  |
| -10 | 8 | 6 | 2469.90  | 2915.88  | 108.74 o |
| -9  | 8 | 6 | 311.72   | 454.98   | 31.48 o  |
| -8  | 8 | 6 | 424.97   | 463.57   | 31.48 o  |
| -7  | 8 | 6 | 3.87     | 17.17    | 14.31 <  |
| -6  | 8 | 6 | 9398.29  | 9116.78  | 369.14 o |
| -5  | 8 | 6 | 13.81    | 68.68    | 14.31 o  |
| -4  | 8 | 6 | 11102.10 | 12078.40 | 377.72 o |
| -3  | 8 | 6 | 104.31   | 103.01   | 14.31 o  |
| -1  | 8 | 6 | 2135.00  | 2292.07  | 82.98 o  |
| 1   | 8 | 6 | 3515.52  | 3834.43  | 165.97 o |
| 2   | 8 | 6 | 4335.11  | 4692.88  | 194.58 o |
| 4   | 8 | 6 | 9018.36  | 8295.52  | 420.64 o |
| 5   | 8 | 6 | 0.15     | 68.68    | 34.34 <  |
| 6   | 8 | 6 | 8679.82  | 8750.50  | 626.67 o |
| 7   | 8 | 6 | 153.82   | 217.48   | 31.48 o  |
| 8   | 8 | 6 | 467.98   | 472.15   | 48.65 o  |
| 9   | 8 | 6 | 206.02   | 331.93   | 42.92 o  |
| 10  | 8 | 6 | 2505.05  | 2993.14  | 171.69 o |
| 11  | 8 | 6 | 72.49    | 40.06    | 25.75 <  |
| 12  | 8 | 6 | 1879.86  | 2624.01  | 208.89 o |
| -13 | 9 | 6 | 93.88    | 2.86     | 34.34 <  |
| -12 | 9 | 6 | 476.89   | 543.69   | 669.59 < |
| -11 | 9 | 6 | 3.70     | 25.75    | 14.31 <  |
| -10 | 9 | 6 | 42.53    | 51.51    | 22.89 <  |
| -9  | 9 | 6 | 146.28   | 134.49   | 22.89 o  |
| -8  | 9 | 6 | 266.91   | 263.26   | 25.75 o  |
| -7  | 9 | 6 | 7.46     | 22.89    | 17.17 <  |
| -6  | 9 | 6 | 30.36    | 17.17    | 20.03 <  |
| -5  | 9 | 6 | 96.06    | 180.27   | 28.62 o  |
| -4  | 9 | 6 | 1922.87  | 2077.46  | 88.71 o  |
| -3  | 9 | 6 | 109.36   | 71.54    | 14.31 o  |
| -1  | 9 | 6 | 1576.41  | 1510.88  | 82.98 o  |
| 1   | 9 | 6 | 1986.04  | 2003.06  | 160.24 o |
| 2   | 9 | 6 | 122.69   | 197.44   | 25.75 o  |
| 3   | 9 | 6 | 2.62     | 5.72     | 11.45 <  |
| 4   | 9 | 6 | 561.04   | 764.02   | 51.51 o  |

## paulkerrite.cif

|     |    |   |          |          |           |
|-----|----|---|----------|----------|-----------|
| 5   | 9  | 6 | 615.01   | 526.52   | 40.06 o   |
| 6   | 9  | 6 | 1.51     | 5.72     | 14.31 <   |
| 7   | 9  | 6 | 116.61   | 131.63   | 25.75 o   |
| 8   | 9  | 6 | 152.42   | 123.04   | 28.62 o   |
| 9   | 9  | 6 | 155.86   | 108.74   | 28.62 o   |
| 10  | 9  | 6 | 29.79    | 22.89    | 20.03 <   |
| 11  | 9  | 6 | 7.12     | 2.86     | 20.03 <   |
| 12  | 9  | 6 | 339.60   | -65.81   | 62.95 <   |
| -13 | 10 | 6 | 44.45    | 0.00     | 31.48 <   |
| -12 | 10 | 6 | 96.03    | 5.72     | 65.81 <   |
| -11 | 10 | 6 | 37.71    | 77.26    | 22.89 o   |
| -9  | 10 | 6 | 846.63   | 569.44   | 1004.39 < |
| -8  | 10 | 6 | 2078.94  | 1739.80  | 329.07 o  |
| -7  | 10 | 6 | 3183.12  | 3362.28  | 151.66 o  |
| -6  | 10 | 6 | 1681.55  | 1997.34  | 85.85 o   |
| -5  | 10 | 6 | 980.80   | 858.45   | 54.37 o   |
| -4  | 10 | 6 | 20767.00 | 20932.00 | 643.84 o  |
| -2  | 10 | 6 | 24182.10 | 19715.80 | 683.90 o  |
| -1  | 10 | 6 | 8138.62  | 7500.02  | 271.84 o  |
| 1   | 10 | 6 | 8331.39  | 6624.40  | 289.01 o  |
| 2   | 10 | 6 | 20412.00 | 22128.10 | 869.90 o  |
| 4   | 10 | 6 | 20809.80 | 18325.10 | 732.55 o  |
| 5   | 10 | 6 | 221.78   | 165.97   | 20.03 o   |
| 6   | 10 | 6 | 2684.36  | 2366.47  | 137.35 o  |
| 7   | 10 | 6 | 2552.37  | 2598.25  | 151.66 o  |
| 8   | 10 | 6 | 3850.29  | 4495.44  | 246.09 o  |
| 9   | 10 | 6 | 1575.35  | 1485.12  | 317.63 o  |
| 10  | 10 | 6 | 6660.05  | 9400.07  | 480.73 o  |
| 11  | 10 | 6 | 52.30    | 54.37    | 31.48 <   |
| 12  | 10 | 6 | 180.98   | 74.40    | 42.92 <   |
| -13 | 11 | 6 | 1.38     | -5.72    | 28.62 <   |
| -12 | 11 | 6 | 57.33    | 34.34    | 22.89 <   |
| -11 | 11 | 6 | 59.12    | 74.40    | 22.89 o   |
| -10 | 11 | 6 | 21.02    | 20.03    | 20.03 <   |
| -9  | 11 | 6 | 96.11    | 94.43    | 20.03 o   |
| -8  | 11 | 6 | 342.80   | 123.04   | 3061.82 < |
| -7  | 11 | 6 | 1.31     | 0.00     | 14.31 <   |
| -6  | 11 | 6 | 34.71    | 28.62    | 17.17 <   |
| -5  | 11 | 6 | 496.10   | 618.09   | 54.37 o   |
| -4  | 11 | 6 | 45.39    | 25.75    | 14.31 <   |
| -3  | 11 | 6 | 8.55     | 8.58     | 11.45 <   |
| -2  | 11 | 6 | 172.08   | 246.09   | 22.89 o   |
| -1  | 11 | 6 | 343.15   | 354.83   | 34.34 o   |
| 0   | 11 | 6 | 7.15     | 14.31    | 11.45 <   |
| 1   | 11 | 6 | 531.17   | 400.61   | 34.34 o   |
| 2   | 11 | 6 | 231.28   | 197.44   | 28.62 o   |
| 3   | 11 | 6 | 23.02    | 11.45    | 8.58 <    |
| 4   | 11 | 6 | 26.36    | 20.03    | 11.45 <   |
| 5   | 11 | 6 | 604.77   | 423.50   | 31.48 o   |
| 6   | 11 | 6 | 44.79    | 25.75    | 8.58 <    |
| 7   | 11 | 6 | 8.50     | 8.58     | 14.31 <   |
| 8   | 11 | 6 | 264.37   | 217.48   | 37.20 o   |
| 9   | 11 | 6 | 71.28    | 28.62    | 20.03 <   |
| 10  | 11 | 6 | 33.72    | 20.03    | 22.89 <   |

## paulkerrite.cif

|     |    |   |          |          |           |
|-----|----|---|----------|----------|-----------|
| 11  | 11 | 6 | 36.87    | 11.45    | 25.75 <   |
| 12  | 11 | 6 | 34.98    | 5.72     | 603.78 <  |
| -12 | 12 | 6 | 444.51   | 223.20   | 1118.85 < |
| -11 | 12 | 6 | 43.33    | 37.20    | 320.49 <  |
| -10 | 12 | 6 | 551.55   | 334.80   | 878.48 <  |
| -9  | 12 | 6 | 1312.62  | 1133.16  | 71.54 o   |
| -8  | 12 | 6 | 22.01    | 20.03    | 14.31 <   |
| -7  | 12 | 6 | 2287.68  | 2641.18  | 108.74 o  |
| -6  | 12 | 6 | 4670.92  | 5419.70  | 228.92 o  |
| -5  | 12 | 6 | 1267.54  | 1339.19  | 62.95 o   |
| -4  | 12 | 6 | 1891.07  | 1765.55  | 91.57 o   |
| -3  | 12 | 6 | 9125.92  | 6701.66  | 1227.59 o |
| -2  | 12 | 6 | 68.51    | 160.24   | 22.89 o   |
| -1  | 12 | 6 | 2425.55  | 2140.41  | 128.77 o  |
| 0   | 12 | 6 | 29039.10 | 28389.10 | 1115.99 o |
| 1   | 12 | 6 | 1834.16  | 1968.72  | 94.43 o   |
| 2   | 12 | 6 | 293.12   | 289.01   | 34.34 o   |
| 3   | 12 | 6 | 8422.39  | 6776.06  | 340.52 o  |
| 7   | 12 | 6 | 3016.88  | 2844.34  | 123.04 o  |
| 8   | 12 | 6 | 17.72    | 14.31    | 17.17 <   |
| 9   | 12 | 6 | 1545.57  | -5.72    | 626.67 <  |
| 11  | 12 | 6 | 9.14     | 11.45    | 22.89 <   |
| -12 | 13 | 6 | 37.42    | -11.45   | 28.62 <   |
| -11 | 13 | 6 | 30.94    | -8.58    | 145.94 <  |
| -10 | 13 | 6 | 165.45   | 134.49   | 755.44 <  |
| -9  | 13 | 6 | 34.02    | 2.86     | 14.31 <   |
| -8  | 13 | 6 | 84.31    | 34.34    | 309.04 <  |
| -7  | 13 | 6 | 380.06   | 206.03   | 583.75 <  |
| -6  | 13 | 6 | 244.73   | 220.34   | 71.54 o   |
| -5  | 13 | 6 | 40.76    | 45.78    | 1158.91 < |
| -4  | 13 | 6 | 174.56   | 151.66   | 22.89 o   |
| -3  | 13 | 6 | 0.11     | 8.58     | 14.31 <   |
| -1  | 13 | 6 | 162.22   | 214.61   | 28.62 o   |
| 0   | 13 | 6 | 9.59     | 0.00     | 11.45 <   |
| 2   | 13 | 6 | 1443.90  | 1290.54  | 82.98 o   |
| 3   | 13 | 6 | 14.26    | 14.31    | 11.45 <   |
| 4   | 13 | 6 | 84.19    | 25.75    | 11.45 <   |
| 5   | 13 | 6 | 125.69   | 51.51    | 17.17 <   |
| 6   | 13 | 6 | 93.87    | 77.26    | 14.31 o   |
| 7   | 13 | 6 | 301.98   | 251.81   | 31.48 o   |
| 8   | 13 | 6 | 32.72    | 14.31    | 14.31 <   |
| 9   | 13 | 6 | 76.37    | 117.32   | 357.69 <  |
| 10  | 13 | 6 | 121.97   | 123.04   | 37.20 o   |
| 11  | 13 | 6 | 171.87   | -20.03   | 869.90 <  |
| 12  | 13 | 6 | 34.20    | -2.86    | 22.89 <   |
| -12 | 14 | 6 | 135.83   | 60.09    | 48.65 <   |
| -11 | 14 | 6 | 60.12    | 65.81    | 28.62 <   |
| -10 | 14 | 6 | 2175.88  | 271.84   | 703.93 <  |
| -9  | 14 | 6 | 505.87   | 105.88   | 646.70 <  |
| -8  | 14 | 6 | 2818.20  | 1545.22  | 2220.53 < |
| -6  | 14 | 6 | 13.01    | 28.62    | 17.17 <   |
| -5  | 14 | 6 | 169.04   | 100.15   | 168.83 <  |
| -4  | 14 | 6 | 8787.27  | 6203.76  | 4481.13 < |
| -3  | 14 | 6 | 154.05   | 54.37    | 22.89 <   |

## paulkerrite.cif

|     |    |   |          |          |         |   |
|-----|----|---|----------|----------|---------|---|
| -2  | 14 | 6 | 13049.70 | 11431.70 | 595.19  | o |
| -1  | 14 | 6 | 5836.97  | 4698.60  | 183.14  | o |
| 0   | 14 | 6 | 14935.80 | 14198.80 | 569.44  | o |
| 1   | 14 | 6 | 5284.90  | 4876.02  | 254.68  | o |
| 2   | 14 | 6 | 15693.60 | 14570.80 | 715.38  | o |
| 3   | 14 | 6 | 156.31   | 57.23    | 14.31   | o |
| 5   | 14 | 6 | 55.96    | 82.98    | 1033.01 | < |
| 6   | 14 | 6 | 169.53   | 74.40    | 17.17   | o |
| 7   | 14 | 6 | 952.16   | 589.47   | 57.23   | o |
| 8   | 14 | 6 | 2049.32  | 2080.32  | 97.29   | o |
| 9   | 14 | 6 | 932.67   | 214.61   | 540.83  | < |
| 10  | 14 | 6 | 2854.15  | 2314.96  | 226.06  | o |
| 11  | 14 | 6 | 0.55     | 14.31    | 25.75   | < |
| -11 | 15 | 6 | 189.82   | -5.72    | 80.12   | < |
| -10 | 15 | 6 | 139.59   | 65.81    | 25.75   | < |
| -9  | 15 | 6 | 1.87     | 2.86     | 14.31   | < |
| -8  | 15 | 6 | 117.06   | 40.06    | 286.15  | < |
| -7  | 15 | 6 | 0.47     | 8.58     | 17.17   | < |
| -6  | 15 | 6 | 67.35    | 40.06    | 17.17   | < |
| -5  | 15 | 6 | 140.59   | 65.81    | 970.05  | < |
| -4  | 15 | 6 | 0.90     | 11.45    | 17.17   | < |
| -3  | 15 | 6 | 199.66   | 271.84   | 42.92   | o |
| -2  | 15 | 6 | 560.86   | 512.21   | 40.06   | o |
| -1  | 15 | 6 | 944.84   | 1010.11  | 62.95   | o |
| 0   | 15 | 6 | 64.95    | 54.37    | 14.31   | o |
| 1   | 15 | 6 | 960.12   | 712.52   | 48.65   | o |
| 2   | 15 | 6 | 141.16   | 97.29    | 22.89   | o |
| 4   | 15 | 6 | 5.40     | 8.58     | 11.45   | < |
| 6   | 15 | 6 | 3.65     | 2.86     | 11.45   | < |
| 7   | 15 | 6 | 26.47    | 5.72     | 11.45   | < |
| 8   | 15 | 6 | 142.24   | 51.51    | 123.04  | < |
| 9   | 15 | 6 | 0.36     | 5.72     | 17.17   | < |
| 10  | 15 | 6 | 90.37    | 31.48    | 22.89   | < |
| 11  | 15 | 6 | 236.29   | -42.92   | 3800.09 | < |
| -11 | 16 | 6 | 51.09    | 8.58     | 31.48   | < |
| -10 | 16 | 6 | 7.09     | 5.72     | 17.17   | < |
| -8  | 16 | 6 | 146.10   | 40.06    | 65.81   | < |
| -7  | 16 | 6 | 1226.50  | 1044.45  | 105.88  | o |
| -6  | 16 | 6 | 317.94   | 226.06   | 40.06   | o |
| -5  | 16 | 6 | 158.19   | 125.91   | 28.62   | o |
| -4  | 16 | 6 | 1003.61  | 1290.54  | 114.46  | o |
| -2  | 16 | 6 | 744.87   | 495.04   | 80.12   | o |
| 0   | 16 | 6 | 27049.40 | 22746.20 | 1101.68 | o |
| 1   | 16 | 6 | 668.93   | 340.52   | 62.95   | o |
| 2   | 16 | 6 | 477.88   | 226.06   | 54.37   | o |
| 3   | 16 | 6 | 4174.17  | 3722.83  | 206.03  | o |
| 4   | 16 | 6 | 1274.76  | 838.42   | 77.26   | o |
| 5   | 16 | 6 | 344.62   | 62.95    | 100.15  | < |
| 6   | 16 | 6 | 576.76   | 331.93   | 45.78   | o |
| 7   | 16 | 6 | 1827.02  | 649.56   | 412.06  | < |
| 8   | 16 | 6 | 291.68   | 123.04   | 440.67  | < |
| 10  | 16 | 6 | 23.58    | 11.45    | 20.03   | < |
| 11  | 16 | 6 | 50.67    | 20.03    | 25.75   | < |
| -10 | 17 | 6 | 121.47   | 2.86     | 329.07  | < |

## paulkerrite.cif

|     |    |   |         |         |           |
|-----|----|---|---------|---------|-----------|
| -9  | 17 | 6 | 5.65    | 11.45   | 17.17 <   |
| -8  | 17 | 6 | 285.51  | 140.21  | 54.37 <   |
| -7  | 17 | 6 | 10.28   | 25.75   | 17.17 <   |
| -6  | 17 | 6 | 40.08   | 22.89   | 17.17 <   |
| -5  | 17 | 6 | 71.84   | 48.65   | 17.17 <   |
| -4  | 17 | 6 | 552.53  | 377.72  | 45.78 o   |
| -3  | 17 | 6 | 121.56  | 85.85   | 20.03 o   |
| -2  | 17 | 6 | 3.49    | 2.86    | 14.31 <   |
| -1  | 17 | 6 | 40.33   | 22.89   | 11.45 <   |
| 0   | 17 | 6 | 0.04    | 5.72    | 11.45 <   |
| 1   | 17 | 6 | 79.90   | 37.20   | 11.45 o   |
| 2   | 17 | 6 | 2.31    | 2.86    | 8.58 <    |
| 3   | 17 | 6 | 135.18  | 77.26   | 17.17 o   |
| 4   | 17 | 6 | 248.07  | 406.33  | 42.92 o   |
| 5   | 17 | 6 | 110.37  | 74.40   | 17.17 o   |
| 6   | 17 | 6 | 26.04   | 14.31   | 11.45 <   |
| 7   | 17 | 6 | 0.42    | 0.00    | 11.45 <   |
| 8   | 17 | 6 | 323.37  | 140.21  | 792.64 <  |
| 9   | 17 | 6 | 1.05    | -2.86   | 11.45 <   |
| 10  | 17 | 6 | 141.48  | 48.65   | 25.75 <   |
| 11  | 17 | 6 | 22.29   | 5.72    | 22.89 <   |
| -10 | 18 | 6 | 2809.47 | 1247.62 | 2452.32 < |
| -9  | 18 | 6 | 53.00   | 31.48   | 17.17 <   |
| -8  | 18 | 6 | 1009.53 | 257.54  | 309.04 <  |
| -7  | 18 | 6 | 101.86  | 180.27  | 34.34 o   |
| -6  | 18 | 6 | 251.75  | 274.70  | 42.92 o   |
| -5  | 18 | 6 | 256.14  | 120.18  | 932.85 <  |
| -4  | 18 | 6 | 8552.94 | 6166.56 | 483.60 o  |
| -3  | 18 | 6 | 640.47  | 294.74  | 62.95 o   |
| -2  | 18 | 6 | 5658.46 | 4504.02 | 200.31 o  |
| -1  | 18 | 6 | 4.41    | 5.72    | 14.31 <   |
| 0   | 18 | 6 | 9.54    | 22.89   | 11.45 <   |
| 1   | 18 | 6 | 19.59   | 17.17   | 14.31 <   |
| 3   | 18 | 6 | 425.05  | 463.57  | 51.51 o   |
| 4   | 18 | 6 | 8530.84 | 7949.28 | 369.14 o  |
| 5   | 18 | 6 | 147.65  | 143.08  | 392.03 <  |
| 6   | 18 | 6 | 387.20  | 254.68  | 311.90 <  |
| 7   | 18 | 6 | 37.77   | 45.78   | 22.89 <   |
| 8   | 18 | 6 | 1978.02 | 489.32  | 563.72 <  |
| 9   | 18 | 6 | 12.21   | 14.31   | 17.17 <   |
| 11  | 18 | 6 | 59.97   | 14.31   | 357.69 <  |
| -9  | 19 | 6 | 123.25  | 5.72    | 669.59 <  |
| -8  | 19 | 6 | 233.38  | 100.15  | 34.34 <   |
| -7  | 19 | 6 | 1.14    | 5.72    | 14.31 <   |
| -6  | 19 | 6 | 175.00  | 62.95   | 25.75 <   |
| -5  | 19 | 6 | 162.10  | 168.83  | 34.34 o   |
| -4  | 19 | 6 | 11.49   | 37.20   | 14.31 <   |
| -3  | 19 | 6 | 10.81   | 14.31   | 11.45 <   |
| -2  | 19 | 6 | 70.51   | 11.45   | 600.92 <  |
| -1  | 19 | 6 | 45.83   | 28.62   | 14.31 <   |
| 0   | 19 | 6 | 62.91   | 105.88  | 25.75 o   |
| 1   | 19 | 6 | 5.47    | 20.03   | 11.45 <   |
| 3   | 19 | 6 | 11.32   | 14.31   | 11.45 <   |
| 4   | 19 | 6 | 170.96  | 120.18  | 578.03 <  |



## paulkerrite.cif

|    |    |   |         |         |           |
|----|----|---|---------|---------|-----------|
| 5  | 19 | 6 | 56.13   | 54.37   | 14.31 o   |
| 6  | 19 | 6 | 73.42   | 60.09   | 14.31 o   |
| 7  | 19 | 6 | 0.16    | 0.00    | 11.45 <   |
| 8  | 19 | 6 | 148.38  | 74.40   | 125.91 <  |
| 9  | 19 | 6 | 282.27  | 22.89   | 1287.68 < |
| 10 | 19 | 6 | 11.71   | 2.86    | 17.17 <   |
| 11 | 19 | 6 | 2.20    | 8.58    | 22.89 <   |
| -9 | 20 | 6 | 391.96  | 34.34   | 51.51 <   |
| -8 | 20 | 6 | 4.38    | 5.72    | 25.75 <   |
| -7 | 20 | 6 | 277.45  | 131.63  | 37.20 o   |
| -6 | 20 | 6 | 1679.75 | 1210.42 | 88.71 o   |
| -5 | 20 | 6 | 2.36    | 5.72    | 20.03 <   |
| -4 | 20 | 6 | 705.60  | 1130.30 | 114.46 o  |
| -3 | 20 | 6 | 1767.63 | 394.89  | 486.46 <  |
| -2 | 20 | 6 | 844.97  | -31.48  | 237.51 <  |
| -1 | 20 | 6 | 28.52   | 11.45   | 11.45 <   |
| 1  | 20 | 6 | 4.40    | 2.86    | 11.45 <   |
| 3  | 20 | 6 | 1209.61 | 1290.54 | 94.43 o   |
| 4  | 20 | 6 | 463.09  | 5.72    | 1467.96 < |
| 5  | 20 | 6 | 14.70   | 42.92   | 20.03 <   |
| 6  | 20 | 6 | 1352.56 | 1333.46 | 154.52 o  |
| 7  | 20 | 6 | 465.45  | 226.06  | 569.44 <  |
| 8  | 20 | 6 | 37.81   | 17.17   | 11.45 <   |
| 9  | 20 | 6 | 326.89  | 37.20   | 406.33 <  |
| 10 | 20 | 6 | 530.02  | -42.92  | 2289.21 < |
| -8 | 21 | 6 | 25.96   | -2.86   | 28.62 <   |
| -7 | 21 | 6 | 103.24  | 88.71   | 22.89 o   |
| -6 | 21 | 6 | 0.43    | 2.86    | 14.31 <   |
| -5 | 21 | 6 | 3.85    | 2.86    | 11.45 <   |
| -4 | 21 | 6 | 377.04  | -91.57  | 45.78 <   |
| -3 | 21 | 6 | 22.79   | 11.45   | 14.31 <   |
| -2 | 21 | 6 | 104.67  | 54.37   | 14.31 o   |
| -1 | 21 | 6 | 338.84  | 8.58    | 117.32 <  |
| 0  | 21 | 6 | 1.27    | 5.72    | 11.45 <   |
| 1  | 21 | 6 | 324.19  | 42.92   | 28.62 <   |
| 2  | 21 | 6 | 69.13   | 62.95   | 20.03 o   |
| 3  | 21 | 6 | 8.71    | 17.17   | 17.17 <   |
| 5  | 21 | 6 | 10.50   | 14.31   | 17.17 <   |
| 6  | 21 | 6 | 4.96    | 2.86    | 11.45 <   |
| 7  | 21 | 6 | 98.97   | 51.51   | 17.17 <   |
| 8  | 21 | 6 | 15.15   | 2.86    | 17.17 <   |
| 9  | 21 | 6 | 80.14   | 25.75   | 20.03 <   |
| -7 | 22 | 6 | 391.12  | 8.58    | 326.21 <  |
| -6 | 22 | 6 | 265.45  | 234.64  | 40.06 o   |
| -5 | 22 | 6 | 9.18    | 0.00    | 14.31 <   |
| -3 | 22 | 6 | 990.92  | -54.37  | 268.98 <  |
| -1 | 22 | 6 | 200.11  | 177.41  | 42.92 o   |
| 0  | 22 | 6 | 3040.98 | 3737.13 | 286.15 o  |
| 1  | 22 | 6 | 262.95  | 145.94  | 34.34 o   |
| 2  | 22 | 6 | 5260.96 | 5940.50 | 323.35 o  |
| 3  | 22 | 6 | 856.84  | 417.78  | 171.69 <  |
| 4  | 22 | 6 | 2423.32 | 3345.11 | 157.38 o  |
| 5  | 22 | 6 | 2.71    | 5.72    | 14.31 <   |
| 6  | 22 | 6 | 214.07  | 180.27  | 31.48 o   |

## paulkerrite.cif

|     |    |   |         |        |         |   |
|-----|----|---|---------|--------|---------|---|
| 7   | 22 | 6 | 484.22  | 486.46 | 40.06   | o |
| 8   | 22 | 6 | 318.71  | 354.83 | 68.68   | o |
| -6  | 23 | 6 | 21.93   | 8.58   | 22.89   | < |
| -5  | 23 | 6 | 19.60   | 22.89  | 14.31   | < |
| -4  | 23 | 6 | 161.18  | 80.12  | 566.58  | < |
| -3  | 23 | 6 | 57.04   | 57.23  | 14.31   | o |
| -2  | 23 | 6 | 785.11  | -28.62 | 689.62  | < |
| -1  | 23 | 6 | 1.26    | 2.86   | 11.45   | < |
| 0   | 23 | 6 | 8.62    | 8.58   | 11.45   | < |
| 1   | 23 | 6 | 1.16    | 2.86   | 11.45   | < |
| 2   | 23 | 6 | 409.38  | 183.14 | 2149.00 | < |
| 3   | 23 | 6 | 179.16  | 62.95  | 1170.36 | < |
| 4   | 23 | 6 | 82.83   | 114.46 | 22.89   | o |
| 5   | 23 | 6 | 0.01    | 14.31  | 11.45   | < |
| 6   | 23 | 6 | 0.02    | -2.86  | 14.31   | < |
| 7   | 23 | 6 | 73.67   | 31.48  | 22.89   | < |
| -5  | 24 | 6 | 201.03  | 85.85  | 31.48   | < |
| -4  | 24 | 6 | 887.95  | 0.00   | 42.92   | < |
| -3  | 24 | 6 | 8.53    | 11.45  | 11.45   | < |
| -2  | 24 | 6 | 2.41    | 0.00   | 11.45   | < |
| -1  | 24 | 6 | 239.46  | 54.37  | 718.24  | < |
| 0   | 24 | 6 | 533.09  | 183.14 | 62.95   | < |
| 1   | 24 | 6 | 137.27  | 65.81  | 51.51   | < |
| 2   | 24 | 6 | 10.80   | 5.72   | 11.45   | < |
| 3   | 24 | 6 | 0.17    | 2.86   | 14.31   | < |
| 4   | 24 | 6 | 1009.19 | 855.59 | 271.84  | o |
| 5   | 24 | 6 | 163.17  | 117.32 | 22.89   | o |
| -3  | 25 | 6 | 11.73   | 0.00   | 14.31   | < |
| -2  | 25 | 6 | 65.10   | -5.72  | 231.78  | < |
| -1  | 25 | 6 | 0.12    | 5.72   | 14.31   | < |
| 0   | 25 | 6 | 0.04    | 0.00   | 11.45   | < |
| 1   | 25 | 6 | 37.38   | 5.72   | 14.31   | < |
| 2   | 25 | 6 | 141.74  | 5.72   | 25.75   | < |
| 3   | 25 | 6 | 8.44    | 5.72   | 14.31   | < |
| 4   | 25 | 6 | 15.01   | 8.58   | 17.17   | < |
| 5   | 25 | 6 | 1.28    | -5.72  | 14.31   | < |
| -2  | 26 | 6 | 764.71  | -22.89 | 2409.39 | < |
| -1  | 26 | 6 | 350.07  | -17.17 | 25.75   | < |
| 0   | 26 | 6 | 186.30  | -5.72  | 726.82  | < |
| 1   | 26 | 6 | 235.31  | 48.65  | 42.92   | < |
| 2   | 26 | 6 | 953.11  | 223.20 | 723.96  | < |
| 3   | 26 | 6 | 746.80  | -5.72  | 1087.37 | < |
| 4   | 26 | 6 | 1151.02 | 941.44 | 2669.79 | < |
| 5   | 26 | 6 | 91.88   | 125.91 | 51.51   | < |
| -1  | 27 | 6 | 241.75  | 0.00   | 22.89   | < |
| 0   | 27 | 6 | 0.02    | 2.86   | 14.31   | < |
| 1   | 27 | 6 | 318.89  | -11.45 | 829.84  | < |
| 2   | 27 | 6 | 60.73   | 14.31  | 17.17   | < |
| 3   | 27 | 6 | 9.95    | 0.00   | 17.17   | < |
| 4   | 27 | 6 | 18.84   | 5.72   | 17.17   | < |
| 2   | 28 | 6 | 26.71   | -14.31 | 17.17   | < |
| 3   | 28 | 6 | 107.83  | 5.72   | 20.03   | < |
| -13 | 1  | 7 | 250.18  | 157.38 | 228.92  | < |
| -12 | 1  | 7 | 25.55   | 31.48  | 14.31   | < |

## paulkerrite.cif

|     |   |   |          |          |          |
|-----|---|---|----------|----------|----------|
| -11 | 1 | 7 | 546.00   | 812.67   | 54.37 o  |
| -9  | 1 | 7 | 29.23    | 45.78    | 17.17 <  |
| -8  | 1 | 7 | 6369.85  | 8395.67  | 349.10 o |
| -6  | 1 | 7 | 1756.98  | 1965.86  | 94.43 o  |
| -3  | 1 | 7 | 5709.60  | 5554.19  | 197.44 o |
| -2  | 1 | 7 | 17551.90 | 17664.10 | 852.73 o |
| -1  | 1 | 7 | 5358.53  | 5671.52  | 200.31 o |
| 1   | 1 | 7 | 3889.68  | 4209.28  | 148.80 o |
| 2   | 1 | 7 | 13521.80 | 15217.50 | 515.07 o |
| 4   | 1 | 7 | 453.39   | 383.44   | 31.48 o  |
| 5   | 1 | 7 | 22266.20 | 18671.40 | 895.65 o |
| -13 | 2 | 7 | 94.74    | 65.81    | 20.03 o  |
| -12 | 2 | 7 | 1.48     | -5.72    | 14.31 <  |
| -11 | 2 | 7 | 0.62     | 5.72     | 14.31 <  |
| -10 | 2 | 7 | 158.96   | 177.41   | 25.75 o  |
| -9  | 2 | 7 | 569.71   | 815.53   | 48.65 o  |
| -8  | 2 | 7 | 4.25     | 17.17    | 20.03 <  |
| -7  | 2 | 7 | 1.15     | 0.00     | 17.17 <  |
| -4  | 2 | 7 | 8.15     | 40.06    | 17.17 <  |
| -3  | 2 | 7 | 4.38     | 25.75    | 14.31 <  |
| -2  | 2 | 7 | 379.54   | 434.95   | 40.06 o  |
| -1  | 2 | 7 | 124.16   | 165.97   | 17.17 o  |
| 0   | 2 | 7 | 1698.42  | 1774.14  | 80.12 o  |
| 2   | 2 | 7 | 486.55   | 446.40   | 22.89 o  |
| 3   | 2 | 7 | 79.16    | 51.51    | 8.58 o   |
| 5   | 2 | 7 | 282.28   | 234.64   | 62.95 o  |
| 6   | 2 | 7 | 97.73    | 40.06    | 17.17 <  |
| 7   | 2 | 7 | 11.85    | 5.72     | 17.17 <  |
| -13 | 3 | 7 | 125.47   | 85.85    | 28.62 <  |
| -12 | 3 | 7 | 1242.46  | 1622.48  | 240.37 o |
| -11 | 3 | 7 | 549.94   | 841.28   | 94.43 o  |
| -10 | 3 | 7 | 5.76     | 28.62    | 14.31 <  |
| -9  | 3 | 7 | 2972.37  | 3468.15  | 134.49 o |
| -7  | 3 | 7 | 736.58   | 784.05   | 45.78 o  |
| -6  | 3 | 7 | 908.08   | 1219.00  | 68.68 o  |
| -5  | 3 | 7 | 2017.44  | 2377.92  | 111.60 o |
| -2  | 3 | 7 | 13572.10 | 15621.00 | 618.09 o |
| -1  | 3 | 7 | 8621.14  | 9079.58  | 314.77 o |
| 0   | 3 | 7 | 14.42    | 45.78    | 17.17 <  |
| 1   | 3 | 7 | 7128.27  | 8415.71  | 340.52 o |
| 6   | 3 | 7 | 198.25   | 297.60   | 25.75 o  |
| -13 | 4 | 7 | 0.21     | -31.48   | 20.03 <  |
| -12 | 4 | 7 | 4.70     | -8.58    | 14.31 <  |
| -11 | 4 | 7 | 253.87   | 191.72   | 60.09 o  |
| -10 | 4 | 7 | 2.55     | 0.00     | 14.31 <  |
| -9  | 4 | 7 | 14.11    | 5.72     | 14.31 <  |
| -8  | 4 | 7 | 201.68   | 257.54   | 25.75 o  |
| -7  | 4 | 7 | 91.62    | 163.11   | 22.89 o  |
| -6  | 4 | 7 | 0.20     | 2.86     | 14.31 <  |
| -5  | 4 | 7 | 37.45    | 54.37    | 20.03 <  |
| -4  | 4 | 7 | 15.86    | 34.34    | 17.17 <  |
| -3  | 4 | 7 | 335.98   | 440.67   | 28.62 o  |
| -2  | 4 | 7 | 12.82    | 40.06    | 17.17 <  |
| -1  | 4 | 7 | 11.30    | 34.34    | 17.17 <  |

## paulkerrite.cif

|     |   |   |          |          |           |
|-----|---|---|----------|----------|-----------|
| 1   | 4 | 7 | 62.99    | 42.92    | 11.45 o   |
| 2   | 4 | 7 | 153.44   | 120.18   | 14.31 o   |
| 3   | 4 | 7 | 204.31   | 240.37   | 20.03 o   |
| 4   | 4 | 7 | 44.28    | 40.06    | 14.31 <   |
| 5   | 4 | 7 | 18.07    | 8.58     | 14.31 <   |
| 6   | 4 | 7 | 0.20     | 5.72     | 11.45 <   |
| 7   | 4 | 7 | 6.00     | 11.45    | 11.45 <   |
| 8   | 4 | 7 | 49.95    | 31.48    | 14.31 <   |
| -13 | 5 | 7 | 770.47   | 818.39   | 68.68 o   |
| -12 | 5 | 7 | 481.35   | 340.52   | 1121.71 < |
| -11 | 5 | 7 | 2684.32  | 2294.93  | 978.64 <  |
| -10 | 5 | 7 | 97.98    | 137.35   | 25.75 o   |
| -9  | 5 | 7 | 1181.04  | 1158.91  | 54.37 o   |
| -7  | 5 | 7 | 454.11   | 343.38   | 28.62 o   |
| -6  | 5 | 7 | 36.76    | 65.81    | 17.17 o   |
| -5  | 5 | 7 | 1447.41  | 1384.97  | 65.81 o   |
| -4  | 5 | 7 | 13964.90 | 16453.70 | 566.58 o  |
| -3  | 5 | 7 | 1471.22  | 1751.25  | 71.54 o   |
| -2  | 5 | 7 | 2707.57  | 2666.93  | 91.57 o   |
| -1  | 5 | 7 | 19952.70 | 23464.40 | 715.38 o  |
| 1   | 5 | 7 | 17073.70 | 16691.20 | 578.03 o  |
| 2   | 5 | 7 | 1611.82  | 1247.62  | 62.95 o   |
| 5   | 5 | 7 | 1531.75  | 1613.89  | 97.29 o   |
| 6   | 5 | 7 | 108.25   | 220.34   | 25.75 o   |
| 7   | 5 | 7 | 341.15   | 280.43   | 28.62 o   |
| 8   | 5 | 7 | 1160.78  | 1115.99  | 68.68 o   |
| 9   | 5 | 7 | 913.50   | 709.66   | 51.51 o   |
| 10  | 5 | 7 | 301.43   | 394.89   | 45.78 o   |
| -13 | 6 | 7 | 77.01    | 114.46   | 45.78 <   |
| -12 | 6 | 7 | 15.40    | 31.48    | 17.17 <   |
| -11 | 6 | 7 | 33.70    | 28.62    | 17.17 <   |
| -10 | 6 | 7 | 4.31     | 34.34    | 14.31 <   |
| -9  | 6 | 7 | 203.71   | 254.68   | 25.75 o   |
| -8  | 6 | 7 | 0.27     | 5.72     | 14.31 <   |
| -7  | 6 | 7 | 0.92     | 2.86     | 14.31 <   |
| -6  | 6 | 7 | 0.07     | 14.31    | 20.03 <   |
| -5  | 6 | 7 | 62.43    | 80.12    | 14.31 o   |
| -4  | 6 | 7 | 61.68    | 111.60   | 17.17 o   |
| -3  | 6 | 7 | 0.51     | 14.31    | 14.31 <   |
| -2  | 6 | 7 | 187.44   | 206.03   | 20.03 o   |
| -1  | 6 | 7 | 196.68   | 303.32   | 20.03 o   |
| 0   | 6 | 7 | 120.25   | 140.21   | 25.75 o   |
| 1   | 6 | 7 | 436.42   | 426.36   | 25.75 o   |
| 2   | 6 | 7 | 101.35   | 82.98    | 17.17 o   |
| 3   | 6 | 7 | 39.61    | 34.34    | 11.45 o   |
| 4   | 6 | 7 | 177.10   | 128.77   | 20.03 o   |
| 5   | 6 | 7 | 31.28    | 14.31    | 28.62 <   |
| 6   | 6 | 7 | 16.97    | 5.72     | 17.17 <   |
| 7   | 6 | 7 | 0.05     | 0.00     | 20.03 <   |
| 8   | 6 | 7 | 28.57    | 17.17    | 14.31 <   |
| 9   | 6 | 7 | 26.30    | 8.58     | 25.75 <   |
| 10  | 6 | 7 | 8.85     | 8.58     | 22.89 <   |
| -13 | 7 | 7 | 282.35   | 111.60   | 57.23 <   |
| -11 | 7 | 7 | 3113.36  | 3548.27  | 163.11 o  |

## paulkerrite.cif

|     |   |   |          |          |          |
|-----|---|---|----------|----------|----------|
| -10 | 7 | 7 | 926.79   | 1196.11  | 71.54 o  |
| -9  | 7 | 7 | 55.14    | 65.81    | 17.17 o  |
| -8  | 7 | 7 | 1418.13  | 1788.44  | 71.54 o  |
| -7  | 7 | 7 | 90.42    | 148.80   | 28.62 o  |
| -6  | 7 | 7 | 1489.89  | 2114.66  | 123.04 o |
| -5  | 7 | 7 | 2650.71  | 2666.93  | 94.43 o  |
| -4  | 7 | 7 | 13330.80 | 14038.60 | 434.95 o |
| -3  | 7 | 7 | 5096.95  | 5396.81  | 177.41 o |
| -2  | 7 | 7 | 17828.20 | 18310.80 | 563.72 o |
| 0   | 7 | 7 | 281.92   | 377.72   | 25.75 o  |
| 1   | 7 | 7 | 3811.38  | 3937.44  | 165.97 o |
| 2   | 7 | 7 | 10713.30 | 10925.30 | 437.81 o |
| 3   | 7 | 7 | 2884.43  | 3313.63  | 168.83 o |
| 5   | 7 | 7 | 2415.41  | 1513.74  | 145.94 o |
| 6   | 7 | 7 | 2286.63  | 2272.04  | 125.91 o |
| 7   | 7 | 7 | 54.96    | 11.45    | 17.17 <  |
| 9   | 7 | 7 | 89.89    | 85.85    | 40.06 <  |
| 10  | 7 | 7 | 1360.41  | 2094.63  | 197.44 o |
| 11  | 7 | 7 | 3119.02  | 3488.18  | 297.60 o |
| -13 | 8 | 7 | 16.69    | -8.58    | 28.62 <  |
| -12 | 8 | 7 | 93.18    | 65.81    | 20.03 o  |
| -11 | 8 | 7 | 229.92   | 263.26   | 31.48 o  |
| -10 | 8 | 7 | 0.31     | -2.86    | 17.17 <  |
| -9  | 8 | 7 | 0.01     | 2.86     | 14.31 <  |
| -8  | 8 | 7 | 14.62    | 8.58     | 14.31 <  |
| -7  | 8 | 7 | 78.50    | 88.71    | 22.89 o  |
| -6  | 8 | 7 | 155.35   | 197.44   | 22.89 o  |
| -5  | 8 | 7 | 6.14     | -2.86    | 11.45 <  |
| -4  | 8 | 7 | 325.33   | 454.98   | 34.34 o  |
| -3  | 8 | 7 | 79.66    | 97.29    | 17.17 o  |
| -2  | 8 | 7 | 801.19   | 938.58   | 42.92 o  |
| 0   | 8 | 7 | 443.91   | 503.63   | 31.48 o  |
| 1   | 8 | 7 | 921.58   | 643.84   | 51.51 o  |
| 2   | 8 | 7 | 437.26   | 566.58   | 42.92 o  |
| 3   | 8 | 7 | 2.39     | 11.45    | 11.45 <  |
| 4   | 8 | 7 | 67.52    | 108.74   | 20.03 o  |
| 5   | 8 | 7 | 15.37    | 2.86     | 20.03 <  |
| 6   | 8 | 7 | 96.12    | 42.92    | 17.17 <  |
| 8   | 8 | 7 | 89.28    | 91.57    | 25.75 o  |
| 9   | 8 | 7 | 9.82     | 25.75    | 20.03 <  |
| 10  | 8 | 7 | 70.72    | 77.26    | 25.75 o  |
| 11  | 8 | 7 | 114.36   | 31.48    | 31.48 <  |
| -12 | 9 | 7 | 367.58   | 289.01   | 535.10 < |
| -11 | 9 | 7 | 282.67   | 223.20   | 28.62 o  |
| -10 | 9 | 7 | 622.00   | 635.26   | 62.95 o  |
| -9  | 9 | 7 | 801.00   | 801.22   | 48.65 o  |
| -8  | 9 | 7 | 276.29   | 394.89   | 31.48 o  |
| -7  | 9 | 7 | 73.54    | 22.89    | 20.03 <  |
| -6  | 9 | 7 | 394.03   | 386.30   | 31.48 o  |
| -5  | 9 | 7 | 297.08   | 311.90   | 37.20 o  |
| -4  | 9 | 7 | 5800.91  | 6979.23  | 226.06 o |
| -3  | 9 | 7 | 507.55   | 626.67   | 34.34 o  |
| -2  | 9 | 7 | 16974.80 | 19258.00 | 595.19 o |
| -1  | 9 | 7 | 826.42   | 935.71   | 48.65 o  |

## paulkerrite.cif

|     |    |   |          |          |          |
|-----|----|---|----------|----------|----------|
| 0   | 9  | 7 | 0.48     | 11.45    | 11.45 <  |
| 1   | 9  | 7 | 780.18   | 683.90   | 45.78 o  |
| 2   | 9  | 7 | 17359.40 | 17750.00 | 855.59 o |
| 5   | 9  | 7 | 243.66   | 214.61   | 42.92 o  |
| 6   | 9  | 7 | 83.77    | 123.04   | 28.62 o  |
| 7   | 9  | 7 | 153.30   | 123.04   | 48.65 <  |
| 8   | 9  | 7 | 144.56   | 128.77   | 320.49 < |
| 9   | 9  | 7 | 570.68   | 392.03   | 755.44 < |
| 10  | 9  | 7 | 703.16   | 635.26   | 65.81 o  |
| 11  | 9  | 7 | 249.12   | 68.68    | 91.57 <  |
| -12 | 10 | 7 | 0.10     | -8.58    | 25.75 <  |
| -11 | 10 | 7 | 96.07    | 94.43    | 22.89 o  |
| -10 | 10 | 7 | 31.38    | 25.75    | 14.31 <  |
| -9  | 10 | 7 | 76.98    | 48.65    | 37.20 <  |
| -8  | 10 | 7 | 24.09    | 34.34    | 14.31 <  |
| -7  | 10 | 7 | 110.71   | 114.46   | 20.03 o  |
| -6  | 10 | 7 | 93.78    | 85.85    | 28.62 <  |
| -5  | 10 | 7 | 215.98   | 194.58   | 25.75 o  |
| -4  | 10 | 7 | 685.36   | 864.18   | 54.37 o  |
| -3  | 10 | 7 | 154.79   | 134.49   | 17.17 o  |
| -2  | 10 | 7 | 9.26     | 31.48    | 14.31 <  |
| -1  | 10 | 7 | 35.59    | 34.34    | 11.45 o  |
| 0   | 10 | 7 | 9.42     | 8.58     | 11.45 <  |
| 1   | 10 | 7 | 6.30     | 17.17    | 11.45 <  |
| 2   | 10 | 7 | 42.14    | 134.49   | 22.89 o  |
| 4   | 10 | 7 | 331.62   | 237.51   | 40.06 o  |
| 5   | 10 | 7 | 198.24   | 151.66   | 22.89 o  |
| 6   | 10 | 7 | 37.42    | 25.75    | 22.89 <  |
| 7   | 10 | 7 | 57.21    | 25.75    | 25.75 <  |
| 8   | 10 | 7 | 58.83    | 65.81    | 25.75 <  |
| 9   | 10 | 7 | 98.47    | 51.51    | 22.89 <  |
| 10  | 10 | 7 | 62.35    | 57.23    | 25.75 <  |
| 11  | 10 | 7 | 67.15    | 31.48    | 22.89 <  |
| -12 | 11 | 7 | 26.94    | 20.03    | 34.34 <  |
| -11 | 11 | 7 | 778.21   | 746.85   | 157.38 o |
| -9  | 11 | 7 | 194.29   | 120.18   | 283.29 < |
| -8  | 11 | 7 | 3.71     | 25.75    | 764.02 < |
| -7  | 11 | 7 | 2097.14  | 2123.24  | 91.57 o  |
| -6  | 11 | 7 | 111.35   | 117.32   | 34.34 o  |
| -5  | 11 | 7 | 11656.90 | 11042.60 | 454.98 o |
| -4  | 11 | 7 | 8.45     | 11.45    | 14.31 <  |
| -3  | 11 | 7 | 324.59   | 343.38   | 31.48 o  |
| -2  | 11 | 7 | 12710.70 | 12776.60 | 523.66 o |
| -1  | 11 | 7 | 2349.62  | 2672.65  | 131.63 o |
| 0   | 11 | 7 | 17.90    | 62.95    | 14.31 o  |
| 1   | 11 | 7 | 3524.56  | 3671.32  | 280.43 o |
| 2   | 11 | 7 | 15502.90 | 15958.70 | 775.47 o |
| 3   | 11 | 7 | 540.18   | 640.98   | 65.81 o  |
| 4   | 11 | 7 | 277.41   | 174.55   | 25.75 o  |
| 6   | 11 | 7 | 15.67    | 0.00     | 37.20 <  |
| 7   | 11 | 7 | 2907.38  | 3161.97  | 186.00 o |
| 8   | 11 | 7 | 2.12     | 28.62    | 17.17 <  |
| 9   | 11 | 7 | 91.54    | 45.78    | 20.03 <  |
| 10  | 11 | 7 | 491.05   | 400.61   | 85.85 o  |

## paulkerrite.cif

|     |    |   |         |         |           |
|-----|----|---|---------|---------|-----------|
| 11  | 11 | 7 | 937.88  | 726.82  | 103.01 o  |
| -12 | 12 | 7 | 8.48    | 0.00    | 28.62 <   |
| -11 | 12 | 7 | 207.86  | 120.18  | 340.52 <  |
| -10 | 12 | 7 | 105.14  | 140.21  | 360.55 <  |
| -9  | 12 | 7 | 0.05    | 5.72    | 17.17 <   |
| -8  | 12 | 7 | 8.60    | -8.58   | 14.31 <   |
| -7  | 12 | 7 | 44.82   | 60.09   | 17.17 o   |
| -6  | 12 | 7 | 411.87  | 572.30  | 40.06 o   |
| -5  | 12 | 7 | 0.69    | 2.86    | 17.17 <   |
| -4  | 12 | 7 | 133.44  | 131.63  | 34.34 o   |
| -3  | 12 | 7 | 15.27   | 22.89   | 14.31 <   |
| -2  | 12 | 7 | 180.88  | 140.21  | 20.03 o   |
| -1  | 12 | 7 | 130.09  | 108.74  | 20.03 o   |
| 0   | 12 | 7 | 651.51  | 612.36  | 45.78 o   |
| 1   | 12 | 7 | 166.02  | 191.72  | 25.75 o   |
| 2   | 12 | 7 | 82.18   | 85.85   | 25.75 o   |
| 3   | 12 | 7 | 4.54    | 2.86    | 11.45 <   |
| 4   | 12 | 7 | 12.21   | 22.89   | 11.45 <   |
| 5   | 12 | 7 | 19.33   | 14.31   | 11.45 <   |
| 6   | 12 | 7 | 862.88  | -5.72   | 34.34 <   |
| 7   | 12 | 7 | 6.11    | 11.45   | 20.03 <   |
| 8   | 12 | 7 | 115.33  | 91.57   | 449.26 <  |
| 9   | 12 | 7 | 25.30   | 25.75   | 22.89 <   |
| 10  | 12 | 7 | 0.63    | 2.86    | 174.55 <  |
| 11  | 12 | 7 | 43.16   | 2.86    | 34.34 <   |
| -11 | 13 | 7 | 54.27   | 31.48   | 22.89 <   |
| -10 | 13 | 7 | 75.51   | 48.65   | 100.15 <  |
| -9  | 13 | 7 | 12.29   | 8.58    | 14.31 <   |
| -8  | 13 | 7 | 6643.59 | 6375.45 | 283.29 o  |
| -7  | 13 | 7 | 1466.36 | 1568.11 | 74.40 o   |
| -6  | 13 | 7 | 1194.79 | 1133.16 | 57.23 o   |
| -5  | 13 | 7 | 2522.84 | 2910.16 | 134.49 o  |
| -4  | 13 | 7 | 893.55  | 1021.56 | 60.09 o   |
| -3  | 13 | 7 | 4331.97 | 3960.33 | 220.34 o  |
| -1  | 13 | 7 | 53.10   | 51.51   | 2117.52 < |
| 0   | 13 | 7 | 27.42   | 42.92   | 14.31 <   |
| 3   | 13 | 7 | 3738.55 | 4046.18 | 297.60 o  |
| 8   | 13 | 7 | 6996.72 | 8824.90 | 463.57 o  |
| 9   | 13 | 7 | 36.46   | 57.23   | 25.75 <   |
| 10  | 13 | 7 | 227.88  | 54.37   | 2598.25 < |
| 11  | 13 | 7 | 66.93   | 14.31   | 25.75 <   |
| -11 | 14 | 7 | 6.78    | -17.17  | 25.75 <   |
| -10 | 14 | 7 | 151.65  | 114.46  | 801.22 <  |
| -9  | 14 | 7 | 67.82   | 48.65   | 294.74 <  |
| -8  | 14 | 7 | 37.81   | 14.31   | 20.03 <   |
| -7  | 14 | 7 | 135.16  | 108.74  | 91.57 <   |
| -6  | 14 | 7 | 113.04  | 91.57   | 123.04 <  |
| -5  | 14 | 7 | 20.89   | 14.31   | 14.31 <   |
| -4  | 14 | 7 | 193.54  | 137.35  | 25.75 o   |
| -3  | 14 | 7 | 7.15    | 28.62   | 94.43 <   |
| -2  | 14 | 7 | 300.72  | 197.44  | 515.07 <  |
| -1  | 14 | 7 | 412.73  | 549.41  | 62.95 o   |
| 0   | 14 | 7 | 20.84   | 14.31   | 14.31 <   |
| 1   | 14 | 7 | 309.02  | 283.29  | 28.62 o   |

## paulkerrite.cif

|     |    |   |         |         |         |   |
|-----|----|---|---------|---------|---------|---|
| 2   | 14 | 7 | 575.60  | 477.87  | 45.78   | o |
| 3   | 14 | 7 | 27.44   | 25.75   | 11.45   | < |
| 4   | 14 | 7 | 100.63  | 77.26   | 17.17   | o |
| 5   | 14 | 7 | 6.62    | 5.72    | 14.31   | < |
| 6   | 14 | 7 | 78.80   | 60.09   | 17.17   | o |
| 7   | 14 | 7 | 30.18   | 14.31   | 20.03   | < |
| 8   | 14 | 7 | 93.06   | 108.74  | 48.65   | < |
| 9   | 14 | 7 | 38.33   | 25.75   | 20.03   | < |
| 10  | 14 | 7 | 126.54  | 45.78   | 248.95  | < |
| 11  | 14 | 7 | 13.92   | 8.58    | 25.75   | < |
| -11 | 15 | 7 | 730.01  | 45.78   | 71.54   | < |
| -10 | 15 | 7 | 3.02    | 22.89   | 22.89   | < |
| -9  | 15 | 7 | 623.50  | 194.58  | 429.23  | < |
| -7  | 15 | 7 | 1.25    | 5.72    | 17.17   | < |
| -6  | 15 | 7 | 63.61   | 48.65   | 20.03   | < |
| -5  | 15 | 7 | 44.06   | 11.45   | 14.31   | < |
| -4  | 15 | 7 | 1947.92 | 1508.02 | 251.81  | o |
| -3  | 15 | 7 | 929.84  | 426.36  | 3828.70 | < |
| -2  | 15 | 7 | 7.58    | 45.78   | 20.03   | < |
| -1  | 15 | 7 | 5685.40 | 6069.27 | 786.92  | o |
| 0   | 15 | 7 | 2.36    | 11.45   | 11.45   | < |
| 1   | 15 | 7 | 5733.03 | 6175.14 | 320.49  | o |
| 2   | 15 | 7 | 31.70   | 54.37   | 14.31   | o |
| 3   | 15 | 7 | 551.76  | 297.60  | 45.78   | o |
| 5   | 15 | 7 | 37.46   | 17.17   | 11.45   | < |
| 6   | 15 | 7 | 138.96  | 160.24  | 31.48   | o |
| 7   | 15 | 7 | 0.40    | 5.72    | 14.31   | < |
| 8   | 15 | 7 | 6607.82 | 7339.78 | 389.17  | o |
| 9   | 15 | 7 | 493.62  | 114.46  | 769.75  | < |
| 10  | 15 | 7 | 11.54   | 22.89   | 22.89   | < |
| 11  | 15 | 7 | 803.82  | -97.29  | 769.75  | < |
| -10 | 16 | 7 | 57.13   | 17.17   | 28.62   | < |
| -9  | 16 | 7 | 180.85  | 42.92   | 592.33  | < |
| -8  | 16 | 7 | 7.91    | -5.72   | 20.03   | < |
| -7  | 16 | 7 | 0.08    | -5.72   | 14.31   | < |
| -6  | 16 | 7 | 105.56  | 60.09   | 217.48  | < |
| -5  | 16 | 7 | 12.02   | 17.17   | 17.17   | < |
| -4  | 16 | 7 | 6.24    | 22.89   | 17.17   | < |
| -3  | 16 | 7 | 86.72   | 114.46  | 25.75   | o |
| -2  | 16 | 7 | 250.61  | 97.29   | 200.31  | < |
| -1  | 16 | 7 | 161.18  | 154.52  | 22.89   | o |
| 0   | 16 | 7 | 1518.65 | 1985.89 | 100.15  | o |
| 1   | 16 | 7 | 182.59  | 105.88  | 42.92   | < |
| 2   | 16 | 7 | 51.76   | 77.26   | 17.17   | o |
| 3   | 16 | 7 | 56.39   | 57.23   | 17.17   | o |
| 4   | 16 | 7 | 12.25   | 20.03   | 11.45   | < |
| 5   | 16 | 7 | 92.29   | 48.65   | 45.78   | < |
| 6   | 16 | 7 | 8.18    | 8.58    | 14.31   | < |
| 7   | 16 | 7 | 48.59   | 42.92   | 17.17   | < |
| 8   | 16 | 7 | 69.24   | 71.54   | 22.89   | o |
| 9   | 16 | 7 | 128.10  | 48.65   | 25.75   | < |
| 10  | 16 | 7 | 14.64   | 5.72    | 17.17   | < |
| 11  | 16 | 7 | 0.41    | 2.86    | 22.89   | < |
| -10 | 17 | 7 | 40.95   | 8.58    | 34.34   | < |



## paulkerrite.cif

|    |    |   |         |         |         |   |
|----|----|---|---------|---------|---------|---|
| -9 | 17 | 7 | 782.42  | 692.49  | 824.11  | < |
| -7 | 17 | 7 | 424.58  | 211.75  | 57.23   | o |
| -6 | 17 | 7 | 91.17   | 97.29   | 25.75   | o |
| -5 | 17 | 7 | 348.35  | 289.01  | 42.92   | o |
| -4 | 17 | 7 | 2218.62 | 2990.28 | 228.92  | o |
| -3 | 17 | 7 | 342.90  | 211.75  | 1293.40 | < |
| -2 | 17 | 7 | 368.95  | -65.81  | 4938.97 | < |
| -1 | 17 | 7 | 4623.73 | 4695.74 | 789.78  | o |
| 0  | 17 | 7 | 42.80   | 77.26   | 17.17   | o |
| 1  | 17 | 7 | 3278.95 | 3018.89 | 257.54  | o |
| 3  | 17 | 7 | 567.79  | 452.12  | 85.85   | o |
| 4  | 17 | 7 | 3456.75 | 3061.82 | 174.55  | o |
| 5  | 17 | 7 | 103.95  | 111.60  | 42.92   | < |
| 6  | 17 | 7 | 2.98    | 20.03   | 14.31   | < |
| 7  | 17 | 7 | 347.77  | 174.55  | 1201.83 | < |
| 8  | 17 | 7 | 2055.86 | 2000.20 | 137.35  | o |
| 9  | 17 | 7 | 730.63  | 91.57   | 743.99  | < |
| 10 | 17 | 7 | 9.07    | -5.72   | 17.17   | < |
| -9 | 18 | 7 | 201.61  | 65.81   | 37.20   | < |
| -8 | 18 | 7 | 2.24    | 5.72    | 14.31   | < |
| -7 | 18 | 7 | 17.58   | 17.17   | 17.17   | < |
| -6 | 18 | 7 | 1.06    | 0.00    | 22.89   | < |
| -5 | 18 | 7 | 27.56   | 25.75   | 20.03   | < |
| -4 | 18 | 7 | 222.52  | 128.77  | 174.55  | < |
| -3 | 18 | 7 | 11.10   | 8.58    | 17.17   | < |
| -2 | 18 | 7 | 314.12  | -60.09  | 1716.91 | < |
| -1 | 18 | 7 | 133.64  | 28.62   | 148.80  | < |
| 0  | 18 | 7 | 528.71  | 306.18  | 68.68   | o |
| 1  | 18 | 7 | 111.18  | 60.09   | 14.31   | o |
| 3  | 18 | 7 | 3.16    | 8.58    | 11.45   | < |
| 4  | 18 | 7 | 220.83  | 194.58  | 100.15  | < |
| 5  | 18 | 7 | 52.72   | 45.78   | 17.17   | < |
| 6  | 18 | 7 | 10.14   | 2.86    | 11.45   | < |
| 7  | 18 | 7 | 31.81   | 14.31   | 17.17   | < |
| 8  | 18 | 7 | 4.71    | -2.86   | 20.03   | < |
| 9  | 18 | 7 | 50.34   | 34.34   | 42.92   | < |
| 10 | 18 | 7 | 8.56    | 5.72    | 20.03   | < |
| -8 | 19 | 7 | 262.53  | 148.80  | 34.34   | o |
| -7 | 19 | 7 | 173.20  | 128.77  | 28.62   | o |
| -6 | 19 | 7 | 437.91  | 168.83  | 62.95   | < |
| -5 | 19 | 7 | 501.38  | 157.38  | 226.06  | < |
| -4 | 19 | 7 | 973.37  | 157.38  | 263.26  | < |
| -3 | 19 | 7 | 569.14  | 366.27  | 60.09   | o |
| -1 | 19 | 7 | 68.18   | 37.20   | 14.31   | < |
| 0  | 19 | 7 | 41.45   | 17.17   | 11.45   | < |
| 1  | 19 | 7 | 50.28   | 17.17   | 11.45   | < |
| 3  | 19 | 7 | 453.33  | 426.36  | 54.37   | o |
| 4  | 19 | 7 | 1069.65 | 881.35  | 4830.23 | < |
| 5  | 19 | 7 | 474.17  | 214.61  | 1628.20 | < |
| 6  | 19 | 7 | 464.00  | 351.97  | 489.32  | < |
| 7  | 19 | 7 | 193.09  | 82.98   | 60.09   | < |
| 8  | 19 | 7 | 271.14  | 163.11  | 48.65   | o |
| 9  | 19 | 7 | 57.10   | 5.72    | 17.17   | < |
| 10 | 19 | 7 | 332.14  | -11.45  | 1081.65 | < |

## paulkerrite.cif

|    |    |   |         |         |           |
|----|----|---|---------|---------|-----------|
| -8 | 20 | 7 | 107.99  | 45.78   | 40.06 <   |
| -7 | 20 | 7 | 1.38    | -8.58   | 14.31 <   |
| -6 | 20 | 7 | 157.13  | 151.66  | 28.62 o   |
| -5 | 20 | 7 | 0.07    | 0.00    | 14.31 <   |
| -4 | 20 | 7 | 0.59    | 0.00    | 11.45 <   |
| -3 | 20 | 7 | 8.88    | 2.86    | 11.45 <   |
| -2 | 20 | 7 | 49.63   | 37.20   | 20.03 <   |
| -1 | 20 | 7 | 4.37    | 8.58    | 14.31 <   |
| 0  | 20 | 7 | 177.12  | 100.15  | 28.62 o   |
| 1  | 20 | 7 | 9.23    | 8.58    | 11.45 <   |
| 2  | 20 | 7 | 19.70   | 20.03   | 17.17 <   |
| 3  | 20 | 7 | 12.29   | 2.86    | 11.45 <   |
| 4  | 20 | 7 | 5.02    | 2.86    | 14.31 <   |
| 5  | 20 | 7 | 1.75    | 2.86    | 11.45 <   |
| 6  | 20 | 7 | 280.58  | 314.77  | 143.08 <  |
| 7  | 20 | 7 | 3.24    | 2.86    | 11.45 <   |
| 8  | 20 | 7 | 30.29   | 17.17   | 20.03 <   |
| 9  | 20 | 7 | 61.27   | 22.89   | 22.89 <   |
| 10 | 20 | 7 | 2.04    | -5.72   | 20.03 <   |
| -6 | 21 | 7 | 95.33   | 25.75   | 17.17 <   |
| -5 | 21 | 7 | 27.62   | 11.45   | 14.31 <   |
| -4 | 21 | 7 | 325.08  | 88.71   | 998.67 <  |
| -2 | 21 | 7 | 2770.76 | 2272.04 | 180.27 o  |
| -1 | 21 | 7 | 52.18   | 22.89   | 14.31 <   |
| 0  | 21 | 7 | 13.95   | 11.45   | 11.45 <   |
| 1  | 21 | 7 | 1.93    | 8.58    | 11.45 <   |
| 2  | 21 | 7 | 1716.46 | 1413.59 | 165.97 o  |
| 3  | 21 | 7 | 290.67  | 303.32  | 45.78 o   |
| 4  | 21 | 7 | 107.22  | 137.35  | 28.62 o   |
| 5  | 21 | 7 | 164.16  | 57.23   | 380.58 <  |
| 6  | 21 | 7 | 137.53  | 60.09   | 257.54 <  |
| 7  | 21 | 7 | 689.35  | 566.58  | 317.63 <  |
| 8  | 21 | 7 | 6.38    | 5.72    | 20.03 <   |
| 9  | 21 | 7 | 0.63    | -5.72   | 17.17 <   |
| -6 | 22 | 7 | 59.19   | 88.71   | 25.75 o   |
| -5 | 22 | 7 | 19.45   | 20.03   | 14.31 <   |
| -4 | 22 | 7 | 456.92  | -57.23  | 598.06 <  |
| -3 | 22 | 7 | 167.41  | 243.23  | 45.78 o   |
| -2 | 22 | 7 | 85.19   | 54.37   | 17.17 o   |
| -1 | 22 | 7 | 0.10    | 0.00    | 11.45 <   |
| 0  | 22 | 7 | 286.01  | -11.45  | 88.71 <   |
| 1  | 22 | 7 | 12.75   | 8.58    | 11.45 <   |
| 2  | 22 | 7 | 98.75   | 71.54   | 380.58 <  |
| 3  | 22 | 7 | 234.34  | 74.40   | 454.98 <  |
| 4  | 22 | 7 | 236.18  | -22.89  | 743.99 <  |
| 5  | 22 | 7 | 12.04   | 20.03   | 20.03 <   |
| 6  | 22 | 7 | 15.39   | 22.89   | 14.31 <   |
| 7  | 22 | 7 | 23.51   | 22.89   | 20.03 <   |
| 8  | 22 | 7 | 6.68    | 5.72    | 17.17 <   |
| -5 | 23 | 7 | 621.87  | 546.55  | 1622.48 < |
| -4 | 23 | 7 | 337.16  | 145.94  | 51.51 <   |
| -3 | 23 | 7 | 118.85  | 100.15  | 22.89 o   |
| -2 | 23 | 7 | 3006.36 | 3914.55 | 291.87 o  |
| -1 | 23 | 7 | 161.10  | -40.06  | 7036.46 < |

## paulkerrite.cif

|     |    |   |          |          |           |
|-----|----|---|----------|----------|-----------|
| 0   | 23 | 7 | 0.61     | 5.72     | 11.45 <   |
| 1   | 23 | 7 | 248.08   | 2.86     | 1027.28 < |
| 2   | 23 | 7 | 3321.21  | 1064.48  | 1447.92 < |
| 3   | 23 | 7 | 199.17   | 108.74   | 317.63 <  |
| 4   | 23 | 7 | 681.91   | 320.49   | 111.60 <  |
| 5   | 23 | 7 | 511.76   | 452.12   | 194.58 <  |
| 6   | 23 | 7 | 53.36    | 45.78    | 14.31 o   |
| -4  | 24 | 7 | 7.00     | 25.75    | 28.62 <   |
| -3  | 24 | 7 | 69.99    | 45.78    | 20.03 <   |
| -2  | 24 | 7 | 2.75     | 2.86     | 11.45 <   |
| -1  | 24 | 7 | 0.32     | -2.86    | 14.31 <   |
| 0   | 24 | 7 | 117.15   | -25.75   | 28.62 <   |
| 1   | 24 | 7 | 1.72     | 5.72     | 11.45 <   |
| 2   | 24 | 7 | 0.46     | 2.86     | 11.45 <   |
| 3   | 24 | 7 | 26.06    | 22.89    | 14.31 <   |
| 4   | 24 | 7 | 0.66     | 5.72     | 17.17 <   |
| 5   | 24 | 7 | 5.25     | 17.17    | 17.17 <   |
| -3  | 25 | 7 | 152.98   | 194.58   | 48.65 o   |
| -2  | 25 | 7 | 340.78   | -22.89   | 394.89 <  |
| -1  | 25 | 7 | 778.65   | -34.34   | 400.61 <  |
| 0   | 25 | 7 | 16.82    | 17.17    | 14.31 <   |
| 1   | 25 | 7 | 700.04   | 51.51    | 766.89 <  |
| 2   | 25 | 7 | 341.15   | 37.20    | 48.65 <   |
| 3   | 25 | 7 | 191.51   | 77.26    | 188.86 <  |
| 4   | 25 | 7 | 907.01   | 712.52   | 400.61 <  |
| -1  | 26 | 7 | 16.92    | 8.58     | 17.17 <   |
| 0   | 26 | 7 | 35.16    | 5.72     | 17.17 <   |
| 1   | 26 | 7 | 1.38     | 2.86     | 14.31 <   |
| 2   | 26 | 7 | 104.33   | 40.06    | 20.03 <   |
| 3   | 26 | 7 | 85.43    | 28.62    | 20.03 <   |
| 4   | 26 | 7 | 108.38   | 45.78    | 20.03 <   |
| 0   | 27 | 7 | 7.72     | -5.72    | 17.17 <   |
| 1   | 27 | 7 | 848.90   | -54.37   | 1284.82 < |
| 2   | 27 | 7 | 4.66     | 2.86     | 14.31 <   |
| 3   | 27 | 7 | 92.49    | 145.94   | 40.06 o   |
| -12 | 0  | 8 | 8.87     | 22.89    | 20.03 <   |
| -11 | 0  | 8 | 21.09    | -2.86    | 20.03 <   |
| -10 | 0  | 8 | 118.91   | 334.80   | 57.23 o   |
| -9  | 0  | 8 | 915.67   | 909.96   | 74.40 o   |
| -8  | 0  | 8 | 2092.09  | 2515.27  | 148.80 o  |
| -7  | 0  | 8 | 1919.09  | 2154.72  | 188.86 o  |
| -6  | 0  | 8 | 57341.90 | 85101.40 | 5717.30 o |
| -4  | 0  | 8 | 25765.60 | 32764.30 | 1568.11 o |
| -3  | 0  | 8 | 10264.90 | 13228.80 | 643.84 o  |
| -2  | 0  | 8 | 8107.55  | 10965.30 | 535.10 o  |
| -1  | 0  | 8 | 1685.31  | 1722.63  | 143.08 o  |
| 2   | 0  | 8 | 8622.39  | 8670.38  | 420.64 o  |
| -12 | 1  | 8 | 9.78     | 2.86     | 14.31 <   |
| -11 | 1  | 8 | 2.10     | 0.00     | 14.31 <   |
| -9  | 1  | 8 | 0.19     | 11.45    | 17.17 <   |
| -8  | 1  | 8 | 12.03    | 20.03    | 17.17 <   |
| -7  | 1  | 8 | 102.82   | 42.92    | 31.48 <   |
| -6  | 1  | 8 | 1194.46  | 1568.11  | 94.43 o   |
| -5  | 1  | 8 | 1422.07  | 1496.57  | 65.81 o   |

## paulkerrite.cif

|     |   |   |          |          |           |
|-----|---|---|----------|----------|-----------|
| -4  | 1 | 8 | 1.11     | 8.58     | 14.31 <   |
| -2  | 1 | 8 | 252.65   | 217.48   | 20.03 o   |
| -1  | 1 | 8 | 110.06   | 145.94   | 25.75 o   |
| 0   | 1 | 8 | 65.72    | 120.18   | 14.31 o   |
| 2   | 1 | 8 | 19.42    | 54.37    | 11.45 o   |
| 4   | 1 | 8 | 5.26     | 8.58     | 5.72 <    |
| -12 | 2 | 8 | 23.28    | 42.92    | 14.31 <   |
| -11 | 2 | 8 | 19.72    | 11.45    | 14.31 <   |
| -9  | 2 | 8 | 1468.72  | 1682.57  | 77.26 o   |
| -8  | 2 | 8 | 75.04    | 65.81    | 17.17 o   |
| -7  | 2 | 8 | 251.77   | 297.60   | 62.95 o   |
| -6  | 2 | 8 | 4525.42  | 5488.38  | 394.89 o  |
| -5  | 2 | 8 | 2368.77  | 2538.16  | 100.15 o  |
| -4  | 2 | 8 | 1331.00  | 1322.02  | 57.23 o   |
| -3  | 2 | 8 | 5337.59  | 6670.18  | 237.51 o  |
| -2  | 2 | 8 | 4661.70  | 5714.44  | 203.17 o  |
| 0   | 2 | 8 | 20182.50 | 24268.50 | 947.16 o  |
| 1   | 2 | 8 | 359.04   | 374.86   | 25.75 o   |
| 2   | 2 | 8 | 7439.87  | 6919.14  | 237.51 o  |
| 3   | 2 | 8 | 6441.51  | 5127.83  | 214.61 o  |
| 5   | 2 | 8 | 2678.67  | 2824.31  | 151.66 o  |
| -12 | 3 | 8 | 172.27   | 134.49   | 208.89 <  |
| -11 | 3 | 8 | 127.12   | 134.49   | 22.89 o   |
| -10 | 3 | 8 | 4.52     | -14.31   | 22.89 <   |
| -9  | 3 | 8 | 1.75     | -2.86    | 14.31 <   |
| -8  | 3 | 8 | 0.31     | 5.72     | 14.31 <   |
| -7  | 3 | 8 | 9.83     | 5.72     | 42.92 <   |
| -6  | 3 | 8 | 216.22   | 314.77   | 51.51 o   |
| -5  | 3 | 8 | 1.80     | 17.17    | 14.31 <   |
| -4  | 3 | 8 | 819.44   | 955.74   | 48.65 o   |
| -2  | 3 | 8 | 490.10   | 652.42   | 34.34 o   |
| 0   | 3 | 8 | 6.13     | 14.31    | 14.31 <   |
| 1   | 3 | 8 | 348.34   | 426.36   | 25.75 o   |
| 2   | 3 | 8 | 569.42   | 592.33   | 31.48 o   |
| 3   | 3 | 8 | 623.44   | 569.44   | 28.62 o   |
| 5   | 3 | 8 | 91.32    | 108.74   | 22.89 o   |
| 6   | 3 | 8 | 294.52   | 217.48   | 20.03 o   |
| -11 | 4 | 8 | 206.23   | 337.66   | 31.48 o   |
| -10 | 4 | 8 | 1438.61  | 1951.55  | 97.29 o   |
| -9  | 4 | 8 | 540.93   | 586.61   | 40.06 o   |
| -8  | 4 | 8 | 2523.49  | 3170.55  | 125.91 o  |
| -6  | 4 | 8 | 2909.18  | 3582.61  | 157.38 o  |
| -5  | 4 | 8 | 581.44   | 566.58   | 37.20 o   |
| -3  | 4 | 8 | 9392.32  | 11995.50 | 414.92 o  |
| -2  | 4 | 8 | 1746.61  | 2183.33  | 85.85 o   |
| -1  | 4 | 8 | 5969.56  | 7362.67  | 300.46 o  |
| 0   | 4 | 8 | 70093.60 | 77921.80 | 3021.76 o |
| 1   | 4 | 8 | 7003.45  | 7554.39  | 234.64 o  |
| 3   | 4 | 8 | 11439.60 | 9749.17  | 466.43 o  |
| 5   | 4 | 8 | 133.13   | 51.51    | 17.17 <   |
| 7   | 4 | 8 | 1155.22  | 978.64   | 57.23 o   |
| -12 | 5 | 8 | 66.94    | 37.20    | 918.54 <  |
| -11 | 5 | 8 | 6.36     | 14.31    | 14.31 <   |
| -10 | 5 | 8 | 6.56     | 0.00     | 14.31 <   |

## paulkerrite.cif

|     |   |   |          |          |           |
|-----|---|---|----------|----------|-----------|
| -9  | 5 | 8 | 5.01     | 0.00     | 11.45 <   |
| -8  | 5 | 8 | 331.12   | 417.78   | 31.48 o   |
| -7  | 5 | 8 | 64.68    | 54.37    | 17.17 o   |
| -6  | 5 | 8 | 31.85    | 48.65    | 14.31 o   |
| -5  | 5 | 8 | 315.50   | 452.12   | 34.34 o   |
| -4  | 5 | 8 | 1601.04  | 2083.18  | 85.85 o   |
| -3  | 5 | 8 | 378.64   | 477.87   | 31.48 o   |
| -2  | 5 | 8 | 36.64    | 40.06    | 14.31 <   |
| 0   | 5 | 8 | 42.38    | 40.06    | 11.45 o   |
| 1   | 5 | 8 | 1538.55  | 1422.17  | 60.09 o   |
| 2   | 5 | 8 | 135.31   | 85.85    | 11.45 o   |
| 5   | 5 | 8 | 929.43   | 826.98   | 57.23 o   |
| 7   | 5 | 8 | 20.57    | 17.17    | 11.45 <   |
| 8   | 5 | 8 | 56.32    | -5.72    | 42.92 <   |
| -12 | 6 | 8 | 2786.80  | 3951.75  | 226.06 o  |
| -11 | 6 | 8 | 9.04     | 14.31    | 14.31 <   |
| -10 | 6 | 8 | 125.69   | 125.91   | 22.89 o   |
| -9  | 6 | 8 | 0.09     | 14.31    | 14.31 <   |
| -8  | 6 | 8 | 1157.19  | 1359.22  | 60.09 o   |
| -7  | 6 | 8 | 90.54    | 165.97   | 22.89 o   |
| -6  | 6 | 8 | 706.60   | 735.41   | 40.06 o   |
| -5  | 6 | 8 | 29.38    | 40.06    | 1224.73 < |
| -4  | 6 | 8 | 17582.20 | 22133.80 | 681.04 o  |
| -3  | 6 | 8 | 5148.43  | 5771.67  | 188.86 o  |
| -1  | 6 | 8 | 545.83   | 618.09   | 31.48 o   |
| 1   | 6 | 8 | 312.62   | 363.41   | 28.62 o   |
| 3   | 6 | 8 | 4347.90  | 5382.50  | 268.98 o  |
| 5   | 6 | 8 | 342.15   | 177.41   | 42.92 o   |
| 6   | 6 | 8 | 297.94   | 154.52   | 40.06 o   |
| 7   | 6 | 8 | 18.33    | 14.31    | 17.17 <   |
| 8   | 6 | 8 | 1308.04  | 1293.40  | 80.12 o   |
| 9   | 6 | 8 | 19.56    | 37.20    | 17.17 <   |
| -12 | 7 | 8 | 9.34     | 0.00     | 263.26 <  |
| -11 | 7 | 8 | 1.94     | 0.00     | 11.45 <   |
| -10 | 7 | 8 | 3.26     | 11.45    | 14.31 <   |
| -9  | 7 | 8 | 6.63     | 8.58     | 14.31 <   |
| -8  | 7 | 8 | 424.38   | 578.03   | 37.20 o   |
| -7  | 7 | 8 | 171.43   | 108.74   | 17.17 o   |
| -6  | 7 | 8 | 252.73   | 263.26   | 34.34 o   |
| -5  | 7 | 8 | 263.71   | 251.81   | 34.34 o   |
| -4  | 7 | 8 | 44.33    | 31.48    | 14.31 <   |
| -3  | 7 | 8 | 352.98   | 297.60   | 25.75 o   |
| -2  | 7 | 8 | 433.42   | 523.66   | 31.48 o   |
| -1  | 7 | 8 | 569.46   | 655.29   | 31.48 o   |
| 0   | 7 | 8 | 13.52    | 17.17    | 11.45 <   |
| 1   | 7 | 8 | 461.45   | 469.29   | 37.20 o   |
| 2   | 7 | 8 | 411.46   | 460.70   | 28.62 o   |
| 3   | 7 | 8 | 295.27   | 294.74   | 25.75 o   |
| 4   | 7 | 8 | 71.47    | 25.75    | 11.45 <   |
| 5   | 7 | 8 | 294.99   | 148.80   | 25.75 o   |
| 6   | 7 | 8 | 115.71   | 54.37    | 22.89 <   |
| 7   | 7 | 8 | 254.52   | 268.98   | 31.48 o   |
| 8   | 7 | 8 | 96.49    | 37.20    | 20.03 <   |
| 9   | 7 | 8 | 26.56    | 28.62    | 17.17 <   |

## paulkerrite.cif

|     |    |   |          |          |          |
|-----|----|---|----------|----------|----------|
| 10  | 7  | 8 | 23.37    | 5.72     | 17.17 <  |
| 11  | 7  | 8 | 6.61     | 2.86     | 17.17 <  |
| -12 | 8  | 8 | 3593.68  | 2277.76  | 200.31 o |
| -11 | 8  | 8 | 28.09    | 5.72     | 14.31 <  |
| -10 | 8  | 8 | 10.38    | 0.00     | 14.31 <  |
| -9  | 8  | 8 | 103.43   | 145.94   | 28.62 o  |
| -8  | 8  | 8 | 2922.23  | 3588.34  | 128.77 o |
| -7  | 8  | 8 | 214.26   | 329.07   | 34.34 o  |
| -6  | 8  | 8 | 11888.30 | 13743.80 | 489.32 o |
| -5  | 8  | 8 | 87.84    | 31.48    | 17.17 <  |
| -4  | 8  | 8 | 1933.95  | 1536.63  | 74.40 o  |
| -3  | 8  | 8 | 10076.50 | 10384.40 | 326.21 o |
| -2  | 8  | 8 | 7659.35  | 7826.23  | 283.29 o |
| -1  | 8  | 8 | 1441.72  | 1679.71  | 62.95 o  |
| 0   | 8  | 8 | 14222.40 | 14050.00 | 586.61 o |
| 2   | 8  | 8 | 5866.90  | 6235.23  | 314.77 o |
| 3   | 8  | 8 | 8101.44  | 8936.50  | 437.81 o |
| 5   | 8  | 8 | 73.88    | 54.37    | 20.03 <  |
| 7   | 8  | 8 | 447.63   | 600.92   | 51.51 o  |
| 8   | 8  | 8 | 1952.12  | 1178.94  | 466.43 < |
| 9   | 8  | 8 | 15.02    | 25.75    | 20.03 <  |
| 10  | 8  | 8 | 57.91    | 51.51    | 22.89 <  |
| 11  | 8  | 8 | 112.20   | 8.58     | 37.20 <  |
| -12 | 9  | 8 | 96.00    | -2.86    | 37.20 <  |
| -11 | 9  | 8 | 60.20    | 65.81    | 20.03 o  |
| -10 | 9  | 8 | 44.42    | 28.62    | 17.17 <  |
| -9  | 9  | 8 | 1.13     | 2.86     | 14.31 <  |
| -8  | 9  | 8 | 197.42   | 208.89   | 28.62 o  |
| -7  | 9  | 8 | 19.12    | 5.72     | 14.31 <  |
| -6  | 9  | 8 | 303.14   | 343.38   | 31.48 o  |
| -5  | 9  | 8 | 36.13    | 74.40    | 20.03 o  |
| -4  | 9  | 8 | 18.95    | 14.31    | 14.31 <  |
| -2  | 9  | 8 | 283.42   | 180.27   | 22.89 o  |
| -1  | 9  | 8 | 856.64   | 1078.79  | 54.37 o  |
| 0   | 9  | 8 | 35.23    | 62.95    | 14.31 o  |
| 2   | 9  | 8 | 142.76   | 168.83   | 25.75 o  |
| 3   | 9  | 8 | 323.53   | 446.40   | 40.06 o  |
| 4   | 9  | 8 | 80.75    | 37.20    | 11.45 o  |
| 5   | 9  | 8 | 0.66     | 5.72     | 17.17 <  |
| 6   | 9  | 8 | 22.49    | 5.72     | 20.03 <  |
| 7   | 9  | 8 | 134.90   | 191.72   | 28.62 o  |
| 8   | 9  | 8 | 232.17   | 206.03   | 34.34 o  |
| 9   | 9  | 8 | 27.42    | 22.89    | 14.31 <  |
| 10  | 9  | 8 | 88.45    | 71.54    | 25.75 <  |
| 11  | 9  | 8 | 41.02    | 17.17    | 22.89 <  |
| -11 | 10 | 8 | 4.35     | 5.72     | 14.31 <  |
| -10 | 10 | 8 | 1591.50  | 1805.61  | 85.85 o  |
| -9  | 10 | 8 | 2201.36  | 2755.64  | 171.69 o |
| -8  | 10 | 8 | 9.11     | 17.17    | 20.03 <  |
| -7  | 10 | 8 | 384.90   | 260.40   | 25.75 o  |
| -6  | 10 | 8 | 1682.27  | 1917.21  | 77.26 o  |
| -5  | 10 | 8 | 381.17   | 197.44   | 37.20 o  |
| -4  | 10 | 8 | 147.53   | 186.00   | 25.75 o  |
| -3  | 10 | 8 | 1992.95  | 1902.91  | 97.29 o  |

## paulkerrite.cif

|     |    |   |          |          |         |   |
|-----|----|---|----------|----------|---------|---|
| -2  | 10 | 8 | 5502.13  | 5416.84  | 206.03  | o |
| 1   | 10 | 8 | 547.07   | 366.27   | 60.09   | o |
| 2   | 10 | 8 | 5806.32  | 6478.46  | 326.21  | o |
| 4   | 10 | 8 | 253.74   | 432.09   | 48.65   | o |
| 7   | 10 | 8 | 695.75   | 477.87   | 48.65   | o |
| 8   | 10 | 8 | 15.70    | 11.45    | 14.31   | < |
| 9   | 10 | 8 | 815.21   | 268.98   | 869.90  | < |
| 10  | 10 | 8 | 1590.34  | 958.61   | 105.88  | o |
| 11  | 10 | 8 | 10.53    | -2.86    | 17.17   | < |
| -11 | 11 | 8 | 11.66    | 2.86     | 20.03   | < |
| -10 | 11 | 8 | 32.86    | 11.45    | 14.31   | < |
| -9  | 11 | 8 | 6.32     | 22.89    | 17.17   | < |
| -8  | 11 | 8 | 9.68     | -20.03   | 20.03   | < |
| -7  | 11 | 8 | 67.13    | 31.48    | 452.12  | < |
| -6  | 11 | 8 | 349.21   | 203.17   | 372.00  | < |
| -5  | 11 | 8 | 600.35   | 549.41   | 42.92   | o |
| -4  | 11 | 8 | 10.88    | 17.17    | 14.31   | < |
| -3  | 11 | 8 | 152.20   | 220.34   | 25.75   | o |
| -2  | 11 | 8 | 613.45   | 689.62   | 40.06   | o |
| -1  | 11 | 8 | 21.08    | 22.89    | 11.45   | < |
| 0   | 11 | 8 | 11.52    | 28.62    | 11.45   | < |
| 1   | 11 | 8 | 15.13    | 28.62    | 14.31   | < |
| 2   | 11 | 8 | 309.21   | 466.43   | 45.78   | o |
| 3   | 11 | 8 | 353.83   | 357.69   | 48.65   | o |
| 4   | 11 | 8 | 4.75     | 22.89    | 11.45   | < |
| 5   | 11 | 8 | 583.32   | 835.56   | 71.54   | o |
| 6   | 11 | 8 | 233.55   | -2.86    | 25.75   | < |
| 7   | 11 | 8 | 179.80   | 194.58   | 31.48   | o |
| 8   | 11 | 8 | 89.30    | 54.37    | 82.98   | < |
| 9   | 11 | 8 | 12.54    | 0.00     | 14.31   | < |
| 10  | 11 | 8 | 7.01     | 11.45    | 20.03   | < |
| 11  | 11 | 8 | 0.49     | 2.86     | 20.03   | < |
| -11 | 12 | 8 | 52.44    | 22.89    | 34.34   | < |
| -10 | 12 | 8 | 167.80   | 157.38   | 143.08  | < |
| -9  | 12 | 8 | 525.94   | 414.92   | 309.04  | < |
| -8  | 12 | 8 | 2198.72  | 2603.98  | 128.77  | o |
| -7  | 12 | 8 | 235.07   | 120.18   | 289.01  | < |
| -6  | 12 | 8 | 19840.20 | 22528.70 | 775.47  | o |
| -5  | 12 | 8 | 884.52   | 1041.59  | 54.37   | o |
| -4  | 12 | 8 | 6567.35  | 5668.65  | 251.81  | o |
| -3  | 12 | 8 | 1818.50  | 1542.35  | 108.74  | o |
| -2  | 12 | 8 | 786.78   | 718.24   | 48.65   | o |
| -1  | 12 | 8 | 139.84   | 68.68    | 2280.62 | < |
| 1   | 12 | 8 | 62.38    | 114.46   | 20.03   | o |
| 2   | 12 | 8 | 429.91   | 764.02   | 111.60  | o |
| 7   | 12 | 8 | 207.30   | 125.91   | 28.62   | o |
| 8   | 12 | 8 | 1771.39  | 1928.66  | 123.04  | o |
| 9   | 12 | 8 | 569.68   | -25.75   | 480.73  | < |
| 10  | 12 | 8 | 106.76   | 197.44   | 54.37   | o |
| 11  | 12 | 8 | 32.35    | 0.00     | 34.34   | < |
| -11 | 13 | 8 | 11.67    | -2.86    | 28.62   | < |
| -10 | 13 | 8 | 22.84    | 17.17    | 14.31   | < |
| -9  | 13 | 8 | 0.28     | 2.86     | 14.31   | < |
| -8  | 13 | 8 | 133.56   | 40.06    | 183.14  | < |

## paulkerrite.cif

|     |    |   |         |         |           |
|-----|----|---|---------|---------|-----------|
| -7  | 13 | 8 | 326.45  | 194.58  | 392.03 <  |
| -6  | 13 | 8 | 289.66  | 340.52  | 31.48 o   |
| -5  | 13 | 8 | 228.61  | 168.83  | 105.88 <  |
| -4  | 13 | 8 | 224.03  | 177.41  | 22.89 o   |
| -3  | 13 | 8 | 366.39  | 346.24  | 37.20 o   |
| -2  | 13 | 8 | 422.31  | 400.61  | 45.78 o   |
| -1  | 13 | 8 | 0.31    | 28.62   | 555.13 <  |
| 0   | 13 | 8 | 28.47   | 28.62   | 17.17 <   |
| 1   | 13 | 8 | 75.56   | 54.37   | 17.17 o   |
| 3   | 13 | 8 | 123.98  | 160.24  | 40.06 o   |
| 4   | 13 | 8 | 145.71  | 240.37  | 31.48 o   |
| 5   | 13 | 8 | 515.78  | 268.98  | 40.06 o   |
| 7   | 13 | 8 | 207.75  | 120.18  | 54.37 <   |
| 8   | 13 | 8 | 25.24   | 5.72    | 17.17 <   |
| 9   | 13 | 8 | 13.51   | 0.00    | 28.62 <   |
| 10  | 13 | 8 | 1.79    | -2.86   | 17.17 <   |
| -10 | 14 | 8 | 123.24  | 97.29   | 60.09 <   |
| -9  | 14 | 8 | 4.45    | 2.86    | 14.31 <   |
| -8  | 14 | 8 | 315.73  | 171.69  | 354.83 <  |
| -7  | 14 | 8 | 12.79   | 40.06   | 17.17 <   |
| -6  | 14 | 8 | 819.17  | 603.78  | 1027.28 < |
| -5  | 14 | 8 | 944.99  | 995.81  | 54.37 o   |
| -3  | 14 | 8 | 86.29   | 60.09   | 20.03 <   |
| -2  | 14 | 8 | 47.75   | 77.26   | 20.03 o   |
| -1  | 14 | 8 | 40.09   | 20.03   | 17.17 <   |
| 0   | 14 | 8 | 6017.91 | 6235.23 | 449.26 o  |
| 1   | 14 | 8 | 6.14    | 17.17   | 14.31 <   |
| 2   | 14 | 8 | 4.93    | 11.45   | 14.31 <   |
| 4   | 14 | 8 | 3144.06 | 2223.39 | 191.72 o  |
| 5   | 14 | 8 | 346.61  | 569.44  | 60.09 o   |
| 6   | 14 | 8 | 1026.47 | 2.86    | 28.62 <   |
| 7   | 14 | 8 | 28.08   | 42.92   | 31.48 <   |
| 8   | 14 | 8 | 502.43  | 535.10  | 924.27 <  |
| 9   | 14 | 8 | 41.60   | 11.45   | 20.03 <   |
| 10  | 14 | 8 | 74.62   | 22.89   | 22.89 <   |
| -9  | 15 | 8 | 50.59   | 22.89   | 500.77 <  |
| -8  | 15 | 8 | 548.91  | 200.31  | 234.64 <  |
| -7  | 15 | 8 | 45.34   | 17.17   | 140.21 <  |
| -6  | 15 | 8 | 191.52  | 40.06   | 2500.96 < |
| -5  | 15 | 8 | 2.16    | 17.17   | 17.17 <   |
| -4  | 15 | 8 | 342.27  | 191.72  | 42.92 o   |
| -3  | 15 | 8 | 302.26  | 160.24  | 1027.28 < |
| -2  | 15 | 8 | 3.46    | 8.58    | 14.31 <   |
| 0   | 15 | 8 | 0.67    | 8.58    | 14.31 <   |
| 1   | 15 | 8 | 421.11  | 389.17  | 34.34 o   |
| 2   | 15 | 8 | 5.58    | 11.45   | 14.31 <   |
| 3   | 15 | 8 | 142.33  | 137.35  | 22.89 o   |
| 4   | 15 | 8 | 56.88   | 57.23   | 20.03 <   |
| 5   | 15 | 8 | 122.45  | 131.63  | 28.62 o   |
| 6   | 15 | 8 | 114.01  | 60.09   | 14.31 o   |
| 7   | 15 | 8 | 157.09  | 128.77  | 28.62 o   |
| 8   | 15 | 8 | 420.62  | 460.70  | 300.46 <  |
| 9   | 15 | 8 | 48.26   | 42.92   | 394.89 <  |
| 10  | 15 | 8 | 15.59   | 5.72    | 17.17 <   |



## paulkerrite.cif

|    |    |   |          |          |           |
|----|----|---|----------|----------|-----------|
| -9 | 16 | 8 | 402.87   | 17.17    | 2077.46 < |
| -8 | 16 | 8 | 276.44   | 40.06    | 320.49 <  |
| -7 | 16 | 8 | 646.96   | 257.54   | 309.04 <  |
| -6 | 16 | 8 | 829.20   | 417.78   | 188.86 <  |
| -5 | 16 | 8 | 0.23     | 0.00     | 14.31 <   |
| -4 | 16 | 8 | 682.72   | 274.70   | 68.68 o   |
| -3 | 16 | 8 | 1154.20  | 1244.76  | 91.57 o   |
| -2 | 16 | 8 | 1481.68  | 2163.30  | 174.55 o  |
| 0  | 16 | 8 | 23427.40 | 25971.10 | 1256.20 o |
| 2  | 16 | 8 | 1607.78  | 1668.26  | 148.80 o  |
| 4  | 16 | 8 | 1001.50  | 918.54   | 91.57 o   |
| 5  | 16 | 8 | 4.22     | 8.58     | 17.17 <   |
| 6  | 16 | 8 | 746.99   | 809.81   | 80.12 o   |
| 7  | 16 | 8 | 518.86   | 586.61   | 97.29 o   |
| 8  | 16 | 8 | 355.05   | 237.51   | 42.92 o   |
| 9  | 16 | 8 | 538.29   | 120.18   | 174.55 <  |
| 10 | 16 | 8 | 1307.74  | 217.48   | 300.46 <  |
| -9 | 17 | 8 | 0.01     | -8.58    | 25.75 <   |
| -8 | 17 | 8 | 186.89   | 65.81    | 380.58 <  |
| -7 | 17 | 8 | 3.50     | 2.86     | 17.17 <   |
| -6 | 17 | 8 | 13.07    | 5.72     | 20.03 <   |
| -5 | 17 | 8 | 63.16    | 42.92    | 17.17 <   |
| -4 | 17 | 8 | 234.31   | 154.52   | 57.23 <   |
| -3 | 17 | 8 | 17.22    | 28.62    | 14.31 <   |
| -2 | 17 | 8 | 74.82    | 25.75    | 14.31 <   |
| -1 | 17 | 8 | 35.57    | 11.45    | 17.17 <   |
| 0  | 17 | 8 | 1.80     | -2.86    | 14.31 <   |
| 1  | 17 | 8 | 31.40    | 11.45    | 14.31 <   |
| 2  | 17 | 8 | 50.72    | 40.06    | 14.31 <   |
| 3  | 17 | 8 | 114.04   | 80.12    | 17.17 o   |
| 4  | 17 | 8 | 259.82   | 300.46   | 42.92 o   |
| 5  | 17 | 8 | 35.13    | 37.20    | 17.17 <   |
| 6  | 17 | 8 | 0.88     | 5.72     | 14.31 <   |
| 7  | 17 | 8 | 18.93    | 17.17    | 14.31 <   |
| 8  | 17 | 8 | 242.91   | 266.12   | 57.23 o   |
| 9  | 17 | 8 | 1.22     | 0.00     | 20.03 <   |
| 10 | 17 | 8 | 16.19    | 14.31    | 34.34 <   |
| -8 | 18 | 8 | 31.49    | 14.31    | 17.17 <   |
| -7 | 18 | 8 | 21.06    | -5.72    | 472.15 <  |
| -6 | 18 | 8 | 133.73   | 114.46   | 25.75 o   |
| -5 | 18 | 8 | 4.32     | 2.86     | 17.17 <   |
| -4 | 18 | 8 | 733.17   | 260.40   | 417.78 <  |
| -3 | 18 | 8 | 15.76    | 28.62    | 20.03 <   |
| -2 | 18 | 8 | 1324.35  | -97.29   | 475.01 <  |
| -1 | 18 | 8 | 111.04   | 105.88   | 20.03 o   |
| 1  | 18 | 8 | 53.71    | 17.17    | 17.17 <   |
| 3  | 18 | 8 | 28.31    | 40.06    | 17.17 <   |
| 4  | 18 | 8 | 488.14   | 403.47   | 48.65 o   |
| 5  | 18 | 8 | 88.48    | 65.81    | 17.17 o   |
| 6  | 18 | 8 | 185.51   | 246.09   | 34.34 o   |
| 7  | 18 | 8 | 87.12    | 60.09    | 17.17 o   |
| 8  | 18 | 8 | 56.75    | 8.58     | 25.75 <   |
| 9  | 18 | 8 | 39.03    | -5.72    | 20.03 <   |
| 10 | 18 | 8 | 355.50   | -5.72    | 200.31 <  |

## paulkerrite.cif

|    |    |   |         |         |           |
|----|----|---|---------|---------|-----------|
| -8 | 19 | 8 | 14.16   | 0.00    | 28.62 <   |
| -7 | 19 | 8 | 37.60   | 2.86    | 14.31 <   |
| -6 | 19 | 8 | 90.37   | 45.78   | 20.03 <   |
| -5 | 19 | 8 | 158.91  | 145.94  | 28.62 o   |
| -4 | 19 | 8 | 34.39   | 11.45   | 14.31 <   |
| -3 | 19 | 8 | 128.78  | -20.03  | 3373.72 < |
| -2 | 19 | 8 | 552.99  | 0.00    | 1293.40 < |
| -1 | 19 | 8 | 3.73    | 11.45   | 14.31 <   |
| 0  | 19 | 8 | 12.73   | 14.31   | 14.31 <   |
| 1  | 19 | 8 | 47.66   | 25.75   | 17.17 <   |
| 3  | 19 | 8 | 461.35  | 769.75  | 82.98 o   |
| 4  | 19 | 8 | 77.73   | 71.54   | 17.17 o   |
| 5  | 19 | 8 | 36.99   | 40.06   | 20.03 <   |
| 6  | 19 | 8 | 87.44   | 71.54   | 20.03 o   |
| 7  | 19 | 8 | 94.42   | 45.78   | 28.62 <   |
| 8  | 19 | 8 | 1.30    | 11.45   | 17.17 <   |
| 9  | 19 | 8 | 12.96   | 2.86    | 20.03 <   |
| -7 | 20 | 8 | 56.37   | 42.92   | 25.75 <   |
| -6 | 20 | 8 | 4266.64 | 3768.61 | 291.87 o  |
| -5 | 20 | 8 | 71.96   | 42.92   | 17.17 <   |
| -4 | 20 | 8 | 84.42   | 48.65   | 17.17 <   |
| -3 | 20 | 8 | 168.31  | 120.18  | 22.89 o   |
| -2 | 20 | 8 | 960.71  | 678.18  | 349.10 <  |
| -1 | 20 | 8 | 6.64    | 8.58    | 14.31 <   |
| 0  | 20 | 8 | 294.88  | -5.72   | 383.44 <  |
| 1  | 20 | 8 | 7.14    | 2.86    | 14.31 <   |
| 2  | 20 | 8 | 1055.05 | 406.33  | 82.98 o   |
| 3  | 20 | 8 | 54.13   | 45.78   | 14.31 o   |
| 4  | 20 | 8 | 79.39   | 68.68   | 17.17 o   |
| 5  | 20 | 8 | 9.45    | 40.06   | 17.17 <   |
| 7  | 20 | 8 | 0.05    | 17.17   | 20.03 <   |
| 8  | 20 | 8 | 362.41  | 211.75  | 738.27 <  |
| 9  | 20 | 8 | 99.49   | 0.00    | 649.56 <  |
| -6 | 21 | 8 | 40.84   | 28.62   | 22.89 <   |
| -5 | 21 | 8 | 37.96   | 17.17   | 14.31 <   |
| -4 | 21 | 8 | 16.11   | 17.17   | 14.31 <   |
| -3 | 21 | 8 | 2.48    | 5.72    | 14.31 <   |
| -2 | 21 | 8 | 13.38   | 20.03   | 14.31 <   |
| -1 | 21 | 8 | 129.17  | 100.15  | 25.75 o   |
| 0  | 21 | 8 | 9.85    | 8.58    | 14.31 <   |
| 1  | 21 | 8 | 201.30  | -8.58   | 65.81 <   |
| 2  | 21 | 8 | 33.72   | 20.03   | 11.45 <   |
| 3  | 21 | 8 | 21.34   | 5.72    | 11.45 <   |
| 4  | 21 | 8 | 40.43   | 20.03   | 14.31 <   |
| 5  | 21 | 8 | 15.46   | 17.17   | 14.31 <   |
| 6  | 21 | 8 | 15.04   | 5.72    | 11.45 <   |
| 7  | 21 | 8 | 6.42    | 2.86    | 17.17 <   |
| 8  | 21 | 8 | 1.96    | 2.86    | 20.03 <   |
| -5 | 22 | 8 | 78.80   | 94.43   | 25.75 o   |
| -4 | 22 | 8 | 302.96  | 54.37   | 1396.42 < |
| -3 | 22 | 8 | 11.08   | 28.62   | 20.03 <   |
| -2 | 22 | 8 | 176.19  | 114.46  | 25.75 o   |
| -1 | 22 | 8 | 13.80   | 0.00    | 14.31 <   |
| 0  | 22 | 8 | 601.92  | -2.86   | 912.82 <  |

## paulkerrite.cif

|     |    |   |          |          |           |
|-----|----|---|----------|----------|-----------|
| 1   | 22 | 8 | 42.97    | 25.75    | 14.31 <   |
| 2   | 22 | 8 | 240.67   | 111.60   | 188.86 <  |
| 3   | 22 | 8 | 38.17    | 45.78    | 14.31 o   |
| 4   | 22 | 8 | 345.29   | 94.43    | 203.17 <  |
| 5   | 22 | 8 | 59.45    | 62.95    | 28.62 <   |
| 6   | 22 | 8 | 725.80   | 947.16   | 77.26 o   |
| 7   | 22 | 8 | 106.33   | 48.65    | 28.62 <   |
| -4  | 23 | 8 | 0.17     | -2.86    | 20.03 <   |
| -3  | 23 | 8 | 51.97    | 40.06    | 20.03 <   |
| -2  | 23 | 8 | 232.26   | 60.09    | 357.69 <  |
| -1  | 23 | 8 | 47.62    | 68.68    | 20.03 o   |
| 0   | 23 | 8 | 1.37     | 5.72     | 37.20 <   |
| 1   | 23 | 8 | 0.18     | 31.48    | 17.17 <   |
| 2   | 23 | 8 | 232.29   | 25.75    | 2910.16 < |
| 3   | 23 | 8 | 27.00    | 34.34    | 14.31 <   |
| 4   | 23 | 8 | 17.01    | 20.03    | 14.31 <   |
| 5   | 23 | 8 | 93.24    | 37.20    | 168.83 <  |
| -3  | 24 | 8 | 32.27    | 2.86     | 20.03 <   |
| -2  | 24 | 8 | 55.96    | 48.65    | 31.48 <   |
| -1  | 24 | 8 | 36.45    | 20.03    | 17.17 <   |
| 0   | 24 | 8 | 2915.35  | -62.95   | 4546.94 < |
| 1   | 24 | 8 | 55.48    | 11.45    | 22.89 <   |
| 2   | 24 | 8 | 11.14    | 5.72     | 11.45 <   |
| 3   | 24 | 8 | 69.76    | 0.00     | 14.31 <   |
| 4   | 24 | 8 | 209.82   | 151.66   | 795.50 <  |
| -2  | 25 | 8 | 84.67    | 120.18   | 40.06 <   |
| -1  | 25 | 8 | 3.82     | -2.86    | 17.17 <   |
| 0   | 25 | 8 | 11.23    | 20.03    | 22.89 <   |
| 1   | 25 | 8 | 2.53     | 2.86     | 20.03 <   |
| 2   | 25 | 8 | 31.97    | 20.03    | 17.17 <   |
| 3   | 25 | 8 | 0.17     | -5.72    | 20.03 <   |
| 4   | 25 | 8 | 158.73   | 62.95    | 48.65 <   |
| -1  | 26 | 8 | 127.05   | 25.75    | 34.34 <   |
| 0   | 26 | 8 | 1055.88  | -25.75   | 938.58 <  |
| 1   | 26 | 8 | 79.94    | 31.48    | 25.75 <   |
| 2   | 26 | 8 | 5.66     | 0.00     | 14.31 <   |
| 3   | 26 | 8 | 193.16   | -11.45   | 1027.28 < |
| 1   | 27 | 8 | 33.91    | 31.48    | 31.48 <   |
| 2   | 27 | 8 | 15.17    | -5.72    | 14.31 <   |
| -12 | 1  | 9 | 273.99   | 440.67   | 45.78 o   |
| -11 | 1  | 9 | 1253.86  | 1513.74  | 71.54 o   |
| -10 | 1  | 9 | 2404.73  | 3410.92  | 200.31 o  |
| -9  | 1  | 9 | 0.32     | 5.72     | 17.17 <   |
| -8  | 1  | 9 | 250.58   | 246.09   | 28.62 o   |
| -7  | 1  | 9 | 1469.66  | 1957.27  | 100.15 o  |
| -6  | 1  | 9 | 1194.33  | 1359.22  | 94.43 o   |
| -5  | 1  | 9 | 1737.69  | 2257.73  | 125.91 o  |
| -3  | 1  | 9 | 105.00   | 117.32   | 17.17 o   |
| -2  | 1  | 9 | 13171.50 | 16170.40 | 552.27 o  |
| -1  | 1  | 9 | 3210.05  | 3679.90  | 134.49 o  |
| 1   | 1  | 9 | 3302.90  | 3210.62  | 134.49 o  |
| 2   | 1  | 9 | 16212.70 | 14447.80 | 569.44 o  |
| 3   | 1  | 9 | 9.01     | 37.20    | 11.45 o   |
| -12 | 2  | 9 | 36.79    | 100.15   | 25.75 o   |

## paulkerrite.cif

|     |   |   |         |         |          |
|-----|---|---|---------|---------|----------|
| -11 | 2 | 9 | 64.66   | 57.23   | 17.17 o  |
| -9  | 2 | 9 | 9.00    | 11.45   | 17.17 <  |
| -8  | 2 | 9 | 0.16    | -8.58   | 17.17 <  |
| -7  | 2 | 9 | 148.02  | 94.43   | 22.89 o  |
| -6  | 2 | 9 | 25.44   | -5.72   | 25.75 <  |
| -5  | 2 | 9 | 304.28  | 337.66  | 37.20 o  |
| -4  | 2 | 9 | 546.98  | 586.61  | 37.20 o  |
| -3  | 2 | 9 | 1752.50 | 2272.04 | 91.57 o  |
| -1  | 2 | 9 | 27.23   | 45.78   | 14.31 o  |
| 0   | 2 | 9 | 0.35    | 5.72    | 14.31 <  |
| 1   | 2 | 9 | 17.90   | 22.89   | 14.31 <  |
| 2   | 2 | 9 | 152.93  | 177.41  | 20.03 o  |
| 4   | 2 | 9 | 391.52  | 326.21  | 31.48 o  |
| 5   | 2 | 9 | 322.15  | 337.66  | 34.34 o  |
| 6   | 2 | 9 | 96.42   | -8.58   | 11.45 <  |
| -12 | 3 | 9 | 337.12  | 331.93  | 45.78 o  |
| -11 | 3 | 9 | 20.38   | 40.06   | 17.17 <  |
| -10 | 3 | 9 | 16.14   | 25.75   | 14.31 <  |
| -9  | 3 | 9 | 422.10  | 403.47  | 37.20 o  |
| -7  | 3 | 9 | 553.49  | 689.62  | 48.65 o  |
| -6  | 3 | 9 | 8.01    | 28.62   | 28.62 <  |
| -5  | 3 | 9 | 3764.90 | 5036.26 | 217.48 o |
| -4  | 3 | 9 | 3778.63 | 4512.60 | 165.97 o |
| -3  | 3 | 9 | 24.97   | 68.68   | 17.17 o  |
| -2  | 3 | 9 | 1259.92 | 1067.34 | 48.65 o  |
| 0   | 3 | 9 | 584.42  | 672.46  | 40.06 o  |
| 1   | 3 | 9 | 979.12  | 1164.64 | 68.68 o  |
| 2   | 3 | 9 | 254.82  | 400.61  | 28.62 o  |
| 3   | 3 | 9 | 3.54    | 17.17   | 8.58 <   |
| 4   | 3 | 9 | 3122.61 | 2312.10 | 165.97 o |
| 5   | 3 | 9 | 4168.79 | 2835.76 | 220.34 o |
| 6   | 3 | 9 | 1.72    | 25.75   | 8.58 <   |
| -12 | 4 | 9 | 4.12    | -8.58   | 31.48 <  |
| -11 | 4 | 9 | 7.26    | 5.72    | 14.31 <  |
| -10 | 4 | 9 | 11.94   | 22.89   | 14.31 <  |
| -9  | 4 | 9 | 1.77    | -2.86   | 20.03 <  |
| -8  | 4 | 9 | 19.44   | -2.86   | 14.31 <  |
| -7  | 4 | 9 | 34.38   | 42.92   | 17.17 <  |
| -6  | 4 | 9 | 54.85   | 62.95   | 22.89 <  |
| -5  | 4 | 9 | 26.69   | 28.62   | 17.17 <  |
| -3  | 4 | 9 | 108.05  | 105.88  | 17.17 o  |
| -2  | 4 | 9 | 151.54  | 183.14  | 20.03 o  |
| -1  | 4 | 9 | 283.25  | 329.07  | 28.62 o  |
| 0   | 4 | 9 | 496.48  | 509.35  | 34.34 o  |
| 1   | 4 | 9 | 396.99  | 389.17  | 28.62 o  |
| 2   | 4 | 9 | 69.43   | 88.71   | 11.45 o  |
| 3   | 4 | 9 | 88.78   | 60.09   | 11.45 o  |
| 5   | 4 | 9 | 24.59   | 14.31   | 25.75 <  |
| 6   | 4 | 9 | 1.97    | -5.72   | 11.45 <  |
| 7   | 4 | 9 | 34.66   | 0.00    | 14.31 <  |
| -11 | 5 | 9 | 84.22   | 148.80  | 22.89 o  |
| -10 | 5 | 9 | 72.33   | 114.46  | 22.89 o  |
| -9  | 5 | 9 | 39.87   | 65.81   | 20.03 o  |
| -8  | 5 | 9 | 2589.89 | 3365.14 | 157.38 o |

## paulkerrite.cif

|     |   |   |          |          |        |   |
|-----|---|---|----------|----------|--------|---|
| -7  | 5 | 9 | 3329.50  | 4091.96  | 143.08 | o |
| -6  | 5 | 9 | 530.15   | 675.32   | 40.06  | o |
| -5  | 5 | 9 | 4948.50  | 6006.31  | 217.48 | o |
| -4  | 5 | 9 | 9754.05  | 10590.50 | 372.00 | o |
| -2  | 5 | 9 | 3024.51  | 2933.05  | 114.46 | o |
| -1  | 5 | 9 | 3212.89  | 3728.55  | 143.08 | o |
| 0   | 5 | 9 | 9.38     | 37.20    | 14.31  | < |
| 1   | 5 | 9 | 3029.36  | 3322.21  | 111.60 | o |
| 2   | 5 | 9 | 2975.73  | 2967.39  | 128.77 | o |
| 3   | 5 | 9 | 57.57    | 94.43    | 14.31  | o |
| 7   | 5 | 9 | 2592.99  | 2380.78  | 125.91 | o |
| 8   | 5 | 9 | 2520.65  | 2558.19  | 131.63 | o |
| -11 | 6 | 9 | 19.05    | 17.17    | 14.31  | < |
| -10 | 6 | 9 | 19.62    | 34.34    | 14.31  | < |
| -9  | 6 | 9 | 10.89    | 8.58     | 14.31  | < |
| -8  | 6 | 9 | 161.18   | 291.87   | 28.62  | o |
| -7  | 6 | 9 | 5.14     | 2.86     | 11.45  | < |
| -6  | 6 | 9 | 8.18     | -2.86    | 14.31  | < |
| -5  | 6 | 9 | 6.18     | 11.45    | 14.31  | < |
| -4  | 6 | 9 | 135.46   | 260.40   | 28.62  | o |
| -3  | 6 | 9 | 11.80    | 14.31    | 11.45  | < |
| -2  | 6 | 9 | 17.74    | 22.89    | 11.45  | < |
| -1  | 6 | 9 | 0.29     | 2.86     | 11.45  | < |
| 0   | 6 | 9 | 9.29     | 8.58     | 11.45  | < |
| 1   | 6 | 9 | 0.47     | 8.58     | 8.58   | < |
| 2   | 6 | 9 | 30.69    | 22.89    | 22.89  | < |
| 3   | 6 | 9 | 11.38    | 2.86     | 11.45  | < |
| 4   | 6 | 9 | 38.49    | 8.58     | 8.58   | < |
| 5   | 6 | 9 | 10.88    | 2.86     | 17.17  | < |
| 6   | 6 | 9 | 189.76   | -8.58    | 25.75  | < |
| 7   | 6 | 9 | 0.01     | 0.00     | 14.31  | < |
| 8   | 6 | 9 | 0.42     | -17.17   | 97.29  | < |
| -11 | 7 | 9 | 88.13    | 85.85    | 20.03  | o |
| -10 | 7 | 9 | 17.67    | 57.23    | 17.17  | o |
| -9  | 7 | 9 | 9.75     | 17.17    | 17.17  | < |
| -8  | 7 | 9 | 2021.52  | 2583.95  | 97.29  | o |
| -7  | 7 | 9 | 3637.06  | 4584.14  | 157.38 | o |
| -6  | 7 | 9 | 119.74   | 160.24   | 25.75  | o |
| -5  | 7 | 9 | 1921.43  | 2263.46  | 100.15 | o |
| -4  | 7 | 9 | 10808.00 | 9826.43  | 354.83 | o |
| -3  | 7 | 9 | 1533.31  | 1871.43  | 82.98  | o |
| -2  | 7 | 9 | 375.25   | 517.93   | 34.34  | o |
| -1  | 7 | 9 | 3647.15  | 4020.42  | 154.52 | o |
| 1   | 7 | 9 | 2924.94  | 3370.86  | 151.66 | o |
| 2   | 7 | 9 | 28.76    | 140.21   | 28.62  | o |
| 3   | 7 | 9 | 1190.95  | 1608.17  | 91.57  | o |
| 5   | 7 | 9 | 1812.89  | 1908.63  | 145.94 | o |
| 6   | 7 | 9 | 133.91   | 211.75   | 34.34  | o |
| 7   | 7 | 9 | 3654.45  | 3685.63  | 194.58 | o |
| 9   | 7 | 9 | 30.25    | 2.86     | 22.89  | < |
| -11 | 8 | 9 | 29.33    | 20.03    | 20.03  | < |
| -10 | 8 | 9 | 4.84     | 8.58     | 17.17  | < |
| -9  | 8 | 9 | 62.20    | 51.51    | 22.89  | < |
| -7  | 8 | 9 | 6.75     | 5.72     | 14.31  | < |

## paulkerrite.cif

|     |    |   |         |         |          |
|-----|----|---|---------|---------|----------|
| -6  | 8  | 9 | 0.54    | -14.31  | 17.17 <  |
| -5  | 8  | 9 | 202.82  | 208.89  | 31.48 o  |
| -4  | 8  | 9 | 64.25   | 45.78   | 20.03 <  |
| -3  | 8  | 9 | 0.12    | 0.00    | 14.31 <  |
| -2  | 8  | 9 | 5.42    | 11.45   | 11.45 <  |
| -1  | 8  | 9 | 264.13  | 306.18  | 25.75 o  |
| 0   | 8  | 9 | 30.49   | 22.89   | 11.45 <  |
| 1   | 8  | 9 | 232.17  | 183.14  | 25.75 o  |
| 2   | 8  | 9 | 30.72   | 34.34   | 14.31 <  |
| 3   | 8  | 9 | 0.68    | -2.86   | 11.45 <  |
| 4   | 8  | 9 | 306.47  | 171.69  | 28.62 o  |
| 7   | 8  | 9 | 8.52    | 0.00    | 17.17 <  |
| 8   | 8  | 9 | 41.95   | 37.20   | 17.17 <  |
| 9   | 8  | 9 | 105.33  | 94.43   | 31.48 <  |
| 10  | 8  | 9 | 46.67   | 74.40   | 34.34 <  |
| -11 | 9  | 9 | 13.59   | 14.31   | 31.48 <  |
| -10 | 9  | 9 | 348.85  | 234.64  | 28.62 o  |
| -9  | 9  | 9 | 186.23  | 263.26  | 34.34 o  |
| -8  | 9  | 9 | 2.61    | 5.72    | 20.03 <  |
| -7  | 9  | 9 | 281.85  | 237.51  | 28.62 o  |
| -6  | 9  | 9 | 4.01    | 20.03   | 14.31 <  |
| -5  | 9  | 9 | 1603.20 | 1530.91 | 74.40 o  |
| -4  | 9  | 9 | 2435.08 | 2492.38 | 103.01 o |
| -3  | 9  | 9 | 1.79    | 5.72    | 11.45 <  |
| -2  | 9  | 9 | 2205.57 | 2128.96 | 91.57 o  |
| -1  | 9  | 9 | 3076.16 | 3940.30 | 151.66 o |
| 0   | 9  | 9 | 138.76  | 74.40   | 14.31 o  |
| 1   | 9  | 9 | 3023.70 | 2569.64 | 125.91 o |
| 2   | 9  | 9 | 1248.73 | 1682.57 | 103.01 o |
| 3   | 9  | 9 | 4.27    | 8.58    | 11.45 <  |
| 6   | 9  | 9 | 0.10    | 5.72    | 22.89 <  |
| 7   | 9  | 9 | 193.95  | 40.06   | 20.03 <  |
| 8   | 9  | 9 | 7.39    | 5.72    | 14.31 <  |
| 9   | 9  | 9 | 176.18  | 40.06   | 20.03 <  |
| -11 | 10 | 9 | 2.98    | 2.86    | 28.62 <  |
| -10 | 10 | 9 | 37.83   | 51.51   | 20.03 <  |
| -9  | 10 | 9 | 121.11  | 91.57   | 22.89 o  |
| -8  | 10 | 9 | 4.43    | 2.86    | 14.31 <  |
| -7  | 10 | 9 | 63.27   | 91.57   | 20.03 o  |
| -6  | 10 | 9 | 88.96   | 105.88  | 20.03 o  |
| -5  | 10 | 9 | 139.03  | 140.21  | 40.06 o  |
| -4  | 10 | 9 | 196.24  | 208.89  | 25.75 o  |
| -3  | 10 | 9 | 360.59  | 271.84  | 34.34 o  |
| -2  | 10 | 9 | 43.37   | 77.26   | 22.89 o  |
| -1  | 10 | 9 | 4.94    | 11.45   | 11.45 <  |
| 0   | 10 | 9 | 64.79   | 125.91  | 17.17 o  |
| 1   | 10 | 9 | 1.80    | 5.72    | 11.45 <  |
| 2   | 10 | 9 | 140.73  | 108.74  | 14.31 o  |
| 3   | 10 | 9 | 266.75  | 509.35  | 51.51 o  |
| 4   | 10 | 9 | 496.65  | 675.32  | 62.95 o  |
| 5   | 10 | 9 | 201.85  | 68.68   | 22.89 o  |
| 6   | 10 | 9 | 7.41    | -5.72   | 20.03 <  |
| 7   | 10 | 9 | 33.66   | 8.58    | 20.03 <  |
| 8   | 10 | 9 | 39.47   | 20.03   | 17.17 <  |

## paulkerrite.cif

|     |    |   |         |         |         |   |
|-----|----|---|---------|---------|---------|---|
| 9   | 10 | 9 | 119.28  | 123.04  | 28.62   | o |
| 10  | 10 | 9 | 3.10    | 11.45   | 17.17   | < |
| -10 | 11 | 9 | 1072.96 | 1061.62 | 3330.80 | < |
| -9  | 11 | 9 | 406.41  | 177.41  | 111.60  | < |
| -8  | 11 | 9 | 1164.03 | 769.75  | 105.88  | o |
| -7  | 11 | 9 | 20.72   | 11.45   | 82.98   | < |
| -6  | 11 | 9 | 70.71   | 28.62   | 17.17   | < |
| -5  | 11 | 9 | 66.17   | 40.06   | 17.17   | < |
| -4  | 11 | 9 | 430.03  | 268.98  | 54.37   | o |
| -3  | 11 | 9 | 415.11  | 397.75  | 45.78   | o |
| -2  | 11 | 9 | 6405.40 | 6309.63 | 240.37  | o |
| -1  | 11 | 9 | 5048.18 | 5202.23 | 200.31  | o |
| 0   | 11 | 9 | 61.23   | 82.98   | 17.17   | o |
| 1   | 11 | 9 | 5027.22 | 4601.31 | 251.81  | o |
| 2   | 11 | 9 | 4635.23 | 6575.75 | 486.46  | o |
| 3   | 11 | 9 | 341.37  | 237.51  | 42.92   | o |
| 4   | 11 | 9 | 795.28  | 351.97  | 60.09   | o |
| 5   | 11 | 9 | 126.10  | 208.89  | 42.92   | o |
| 7   | 11 | 9 | 13.81   | 34.34   | 17.17   | < |
| 8   | 11 | 9 | 1056.71 | 801.22  | 566.58  | < |
| 9   | 11 | 9 | 573.64  | 183.14  | 54.37   | o |
| -10 | 12 | 9 | 0.40    | -8.58   | 17.17   | < |
| -9  | 12 | 9 | 51.32   | 17.17   | 17.17   | < |
| -8  | 12 | 9 | 28.04   | 37.20   | 17.17   | < |
| -7  | 12 | 9 | 2.59    | 2.86    | 20.03   | < |
| -6  | 12 | 9 | 884.16  | 689.62  | 94.43   | o |
| -5  | 12 | 9 | 21.06   | 14.31   | 14.31   | < |
| -4  | 12 | 9 | 217.03  | 197.44  | 82.98   | < |
| -3  | 12 | 9 | 138.36  | 123.04  | 20.03   | o |
| -2  | 12 | 9 | 1.96    | 2.86    | 14.31   | < |
| -1  | 12 | 9 | 190.16  | 231.78  | 28.62   | o |
| 0   | 12 | 9 | 0.63    | 0.00    | 11.45   | < |
| 1   | 12 | 9 | 123.02  | 77.26   | 20.03   | o |
| 2   | 12 | 9 | 0.37    | 2.86    | 11.45   | < |
| 3   | 12 | 9 | 87.13   | 54.37   | 14.31   | o |
| 4   | 12 | 9 | 394.63  | 208.89  | 51.51   | o |
| 5   | 12 | 9 | 32.81   | 14.31   | 11.45   | < |
| 7   | 12 | 9 | 10.01   | 20.03   | 17.17   | < |
| 8   | 12 | 9 | 0.20    | -2.86   | 17.17   | < |
| 9   | 12 | 9 | 80.22   | 51.51   | 25.75   | < |
| 10  | 12 | 9 | 57.79   | 85.85   | 37.20   | < |
| -10 | 13 | 9 | 400.47  | 82.98   | 1181.80 | < |
| -9  | 13 | 9 | 1.70    | 11.45   | 14.31   | < |
| -8  | 13 | 9 | 552.92  | 446.40  | 94.43   | o |
| -7  | 13 | 9 | 828.42  | 829.84  | 51.51   | o |
| -6  | 13 | 9 | 637.57  | 223.20  | 463.57  | < |
| -5  | 13 | 9 | 250.18  | 180.27  | 200.31  | < |
| -4  | 13 | 9 | 916.19  | 904.24  | 111.60  | o |
| -3  | 13 | 9 | 34.31   | 68.68   | 17.17   | o |
| -2  | 13 | 9 | 4388.64 | 3144.80 | 200.31  | o |
| -1  | 13 | 9 | 584.29  | 580.89  | 45.78   | o |
| 0   | 13 | 9 | 0.31    | 37.20   | 17.17   | < |
| 1   | 13 | 9 | 543.12  | 160.24  | 94.43   | < |
| 3   | 13 | 9 | 106.25  | 5.72    | 17.17   | < |

## paulkerrite.cif

|    |    |   |         |         |           |
|----|----|---|---------|---------|-----------|
| 4  | 13 | 9 | 150.32  | 208.89  | 28.62 o   |
| 5  | 13 | 9 | 200.86  | 40.06   | 22.89 <   |
| 6  | 13 | 9 | 75.45   | 2.86    | 34.34 <   |
| 7  | 13 | 9 | 840.05  | 798.36  | 68.68 o   |
| 8  | 13 | 9 | 487.17  | 417.78  | 51.51 o   |
| 9  | 13 | 9 | 15.23   | 17.17   | 31.48 <   |
| 10 | 13 | 9 | 596.10  | -31.48  | 2606.84 < |
| -9 | 14 | 9 | 50.91   | 14.31   | 14.31 <   |
| -8 | 14 | 9 | 80.93   | 34.34   | 183.14 <  |
| -7 | 14 | 9 | 15.59   | 0.00    | 14.31 <   |
| -6 | 14 | 9 | 10.03   | 22.89   | 25.75 <   |
| -5 | 14 | 9 | 1.97    | 0.00    | 14.31 <   |
| -4 | 14 | 9 | 38.79   | 45.78   | 17.17 <   |
| -3 | 14 | 9 | 462.49  | 283.29  | 68.68 o   |
| -2 | 14 | 9 | 1.69    | 5.72    | 11.45 <   |
| -1 | 14 | 9 | 175.94  | 85.85   | 54.37 <   |
| 0  | 14 | 9 | 239.78  | 134.49  | 337.66 <  |
| 1  | 14 | 9 | 143.72  | 148.80  | 22.89 o   |
| 2  | 14 | 9 | 32.82   | 40.06   | 17.17 <   |
| 3  | 14 | 9 | 532.63  | 563.72  | 65.81 o   |
| 4  | 14 | 9 | 18.68   | 5.72    | 14.31 <   |
| 5  | 14 | 9 | 6.42    | 5.72    | 17.17 <   |
| 6  | 14 | 9 | 1.01    | -2.86   | 17.17 <   |
| 7  | 14 | 9 | 3.44    | 0.00    | 17.17 <   |
| 8  | 14 | 9 | 203.37  | 274.70  | 42.92 o   |
| 9  | 14 | 9 | 62.79   | 22.89   | 340.52 <  |
| 10 | 14 | 9 | 65.57   | 22.89   | 22.89 <   |
| -9 | 15 | 9 | 34.22   | 28.62   | 28.62 <   |
| -8 | 15 | 9 | 3479.10 | 3928.86 | 165.97 o  |
| -7 | 15 | 9 | 2076.85 | 1001.53 | 220.34 o  |
| -6 | 15 | 9 | 24.75   | 17.17   | 17.17 <   |
| -5 | 15 | 9 | 623.57  | 449.26  | 82.98 o   |
| -4 | 15 | 9 | 627.92  | 655.29  | 82.98 o   |
| -3 | 15 | 9 | 122.15  | 108.74  | 20.03 o   |
| -2 | 15 | 9 | 1121.81 | 709.66  | 2274.90 < |
| -1 | 15 | 9 | 19.98   | 34.34   | 334.80 <  |
| 0  | 15 | 9 | 0.06    | 8.58    | 14.31 <   |
| 1  | 15 | 9 | 1.88    | 28.62   | 14.31 <   |
| 3  | 15 | 9 | 67.21   | 85.85   | 17.17 o   |
| 4  | 15 | 9 | 601.61  | 331.93  | 65.81 o   |
| 5  | 15 | 9 | 633.93  | 437.81  | 45.78 o   |
| 7  | 15 | 9 | 2239.27 | 2412.25 | 145.94 o  |
| 8  | 15 | 9 | 3501.83 | 4979.03 | 271.84 o  |
| 9  | 15 | 9 | 13.16   | 2.86    | 17.17 <   |
| -8 | 16 | 9 | 41.46   | 31.48   | 246.09 <  |
| -7 | 16 | 9 | 1.58    | -2.86   | 14.31 <   |
| -6 | 16 | 9 | 0.27    | 5.72    | 14.31 <   |
| -5 | 16 | 9 | 24.07   | 42.92   | 22.89 <   |
| -4 | 16 | 9 | 49.87   | 31.48   | 31.48 <   |
| -3 | 16 | 9 | 4.36    | 11.45   | 17.17 <   |
| -2 | 16 | 9 | 14.80   | 57.23   | 17.17 o   |
| -1 | 16 | 9 | 0.59    | 8.58    | 17.17 <   |
| 1  | 16 | 9 | 3.30    | 0.00    | 14.31 <   |
| 2  | 16 | 9 | 114.32  | 82.98   | 17.17 o   |



## paulkerrite.cif

|    |    |   |         |         |           |
|----|----|---|---------|---------|-----------|
| 3  | 16 | 9 | 38.16   | 17.17   | 14.31 <   |
| 4  | 16 | 9 | 34.99   | 25.75   | 14.31 <   |
| 5  | 16 | 9 | 7.92    | 8.58    | 17.17 <   |
| 6  | 16 | 9 | 24.39   | 14.31   | 17.17 <   |
| 7  | 16 | 9 | 1.69    | 2.86    | 17.17 <   |
| 8  | 16 | 9 | 0.39    | -2.86   | 20.03 <   |
| 9  | 16 | 9 | 15.15   | 5.72    | 17.17 <   |
| -8 | 17 | 9 | 972.73  | 858.45  | 82.98 o   |
| -7 | 17 | 9 | 508.65  | 123.04  | 1115.99 < |
| -6 | 17 | 9 | 24.63   | 37.20   | 17.17 <   |
| -5 | 17 | 9 | 1020.51 | 598.06  | 91.57 o   |
| -4 | 17 | 9 | 570.33  | 340.52  | 45.78 o   |
| -3 | 17 | 9 | 32.92   | 11.45   | 20.03 <   |
| -2 | 17 | 9 | 104.55  | 82.98   | 331.93 <  |
| -1 | 17 | 9 | 177.39  | 120.18  | 1880.01 < |
| 0  | 17 | 9 | 91.38   | 42.92   | 317.63 <  |
| 1  | 17 | 9 | 241.70  | 231.78  | 31.48 o   |
| 2  | 17 | 9 | 7.24    | 60.09   | 17.17 o   |
| 3  | 17 | 9 | 28.20   | 22.89   | 14.31 <   |
| 4  | 17 | 9 | 209.43  | 280.43  | 40.06 o   |
| 5  | 17 | 9 | 1094.26 | 1124.57 | 65.81 o   |
| 6  | 17 | 9 | 16.12   | 40.06   | 20.03 <   |
| 7  | 17 | 9 | 292.09  | 260.40  | 42.92 o   |
| 8  | 17 | 9 | 1180.77 | 878.48  | 145.94 o  |
| 9  | 17 | 9 | 56.28   | -2.86   | 22.89 <   |
| -7 | 18 | 9 | 0.52    | 5.72    | 17.17 <   |
| -6 | 18 | 9 | 17.00   | 5.72    | 17.17 <   |
| -5 | 18 | 9 | 3.56    | 2.86    | 14.31 <   |
| -4 | 18 | 9 | 214.20  | 183.14  | 40.06 o   |
| -3 | 18 | 9 | 65.49   | 54.37   | 17.17 o   |
| -2 | 18 | 9 | 69.68   | 77.26   | 20.03 o   |
| -1 | 18 | 9 | 26.22   | 20.03   | 237.51 <  |
| 0  | 18 | 9 | 75.85   | 28.62   | 20.03 <   |
| 1  | 18 | 9 | 41.46   | 34.34   | 14.31 <   |
| 2  | 18 | 9 | 250.35  | 283.29  | 34.34 o   |
| 3  | 18 | 9 | 98.10   | 80.12   | 20.03 o   |
| 4  | 18 | 9 | 124.90  | 203.17  | 31.48 o   |
| 5  | 18 | 9 | 0.21    | 5.72    | 14.31 <   |
| 6  | 18 | 9 | 55.97   | 11.45   | 22.89 <   |
| 7  | 18 | 9 | 0.13    | 2.86    | 17.17 <   |
| 8  | 18 | 9 | 2.57    | -2.86   | 34.34 <   |
| 9  | 18 | 9 | 6.25    | 2.86    | 17.17 <   |
| -7 | 19 | 9 | 334.33  | 171.69  | 48.65 o   |
| -6 | 19 | 9 | 196.27  | 77.26   | 34.34 <   |
| -5 | 19 | 9 | 179.45  | 103.01  | 25.75 o   |
| -4 | 19 | 9 | 458.28  | 294.74  | 45.78 o   |
| -3 | 19 | 9 | 165.92  | 174.55  | 25.75 o   |
| -2 | 19 | 9 | 656.86  | -80.12  | 2329.27 < |
| -1 | 19 | 9 | 1022.19 | -82.98  | 769.75 <  |
| 0  | 19 | 9 | 11.68   | 17.17   | 14.31 <   |
| 2  | 19 | 9 | 635.10  | -31.48  | 40.06 <   |
| 3  | 19 | 9 | 96.29   | 91.57   | 25.75 o   |
| 4  | 19 | 9 | 703.75  | 729.68  | 82.98 o   |
| 5  | 19 | 9 | 179.38  | 114.46  | 20.03 o   |

## paulkerrite.cif

|    |    |   |        |         |         |   |
|----|----|---|--------|---------|---------|---|
| 6  | 19 | 9 | 49.85  | 51.51   | 20.03   | < |
| 7  | 19 | 9 | 340.07 | 268.98  | 45.78   | o |
| 8  | 19 | 9 | 54.43  | 20.03   | 25.75   | < |
| 9  | 19 | 9 | 61.27  | 5.72    | 20.03   | < |
| -6 | 20 | 9 | 241.81 | 309.04  | 48.65   | o |
| -5 | 20 | 9 | 49.46  | 31.48   | 17.17   | < |
| -4 | 20 | 9 | 0.14   | 11.45   | 17.17   | < |
| -3 | 20 | 9 | 0.11   | 2.86    | 14.31   | < |
| -2 | 20 | 9 | 2.50   | 14.31   | 14.31   | < |
| -1 | 20 | 9 | 2.40   | 2.86    | 14.31   | < |
| 0  | 20 | 9 | 7.38   | 5.72    | 11.45   | < |
| 1  | 20 | 9 | 6.36   | 0.00    | 14.31   | < |
| 2  | 20 | 9 | 7.16   | 11.45   | 17.17   | < |
| 3  | 20 | 9 | 0.09   | -2.86   | 17.17   | < |
| 4  | 20 | 9 | 33.13  | 40.06   | 17.17   | < |
| 5  | 20 | 9 | 82.84  | 57.23   | 20.03   | < |
| 6  | 20 | 9 | 181.05 | 254.68  | 60.09   | o |
| 7  | 20 | 9 | 9.12   | 8.58    | 20.03   | < |
| 8  | 20 | 9 | 87.68  | 8.58    | 22.89   | < |
| -5 | 21 | 9 | 12.38  | 5.72    | 17.17   | < |
| -4 | 21 | 9 | 9.44   | 5.72    | 20.03   | < |
| -3 | 21 | 9 | 25.80  | 8.58    | 14.31   | < |
| -2 | 21 | 9 | 442.76 | -68.68  | 1244.76 | < |
| -1 | 21 | 9 | 973.73 | 1339.19 | 125.91  | o |
| 0  | 21 | 9 | 6.46   | 40.06   | 17.17   | < |
| 1  | 21 | 9 | 919.71 | 31.48   | 1553.80 | < |
| 3  | 21 | 9 | 44.40  | 25.75   | 14.31   | < |
| 4  | 21 | 9 | 100.28 | 25.75   | 34.34   | < |
| 5  | 21 | 9 | 9.12   | -2.86   | 17.17   | < |
| 6  | 21 | 9 | 0.39   | 8.58    | 22.89   | < |
| 7  | 21 | 9 | 249.26 | 131.63  | 749.72  | < |
| 8  | 21 | 9 | 243.62 | -2.86   | 42.92   | < |
| -4 | 22 | 9 | 27.84  | 11.45   | 20.03   | < |
| -3 | 22 | 9 | 33.87  | 17.17   | 17.17   | < |
| -2 | 22 | 9 | 62.35  | 42.92   | 17.17   | < |
| -1 | 22 | 9 | 58.48  | 37.20   | 117.32  | < |
| 0  | 22 | 9 | 208.03 | 289.01  | 37.20   | o |
| 1  | 22 | 9 | 78.31  | 22.89   | 154.52  | < |
| 2  | 22 | 9 | 20.87  | 40.06   | 17.17   | < |
| 3  | 22 | 9 | 32.26  | 25.75   | 14.31   | < |
| 4  | 22 | 9 | 92.14  | 34.34   | 22.89   | < |
| 5  | 22 | 9 | 12.07  | 2.86    | 22.89   | < |
| 6  | 22 | 9 | 2.78   | 5.72    | 17.17   | < |
| -3 | 23 | 9 | 7.27   | 5.72    | 34.34   | < |
| -2 | 23 | 9 | 707.72 | -28.62  | 2303.52 | < |
| 0  | 23 | 9 | 34.82  | -2.86   | 20.03   | < |
| 1  | 23 | 9 | 956.29 | -40.06  | 1090.24 | < |
| 2  | 23 | 9 | 417.48 | -28.62  | 100.15  | < |
| 3  | 23 | 9 | 2.01   | -2.86   | 14.31   | < |
| 4  | 23 | 9 | 360.64 | 240.37  | 42.92   | o |
| -2 | 24 | 9 | 8.84   | 20.03   | 20.03   | < |
| -1 | 24 | 9 | 28.35  | 22.89   | 20.03   | < |
| 0  | 24 | 9 | 12.57  | 17.17   | 22.89   | < |
| 1  | 24 | 9 | 32.98  | 11.45   | 25.75   | < |

## paulkerrite.cif

|     |    |    |          |          |           |
|-----|----|----|----------|----------|-----------|
| 2   | 24 | 9  | 5.66     | 2.86     | 20.03 <   |
| 3   | 24 | 9  | 2.68     | -2.86    | 25.75 <   |
| -1  | 25 | 9  | 122.68   | 120.18   | 40.06 <   |
| 0   | 25 | 9  | 5.54     | 8.58     | 20.03 <   |
| 1   | 25 | 9  | 121.32   | 51.51    | 28.62 <   |
| 2   | 25 | 9  | 1.39     | 8.58     | 20.03 <   |
| 0   | 26 | 9  | 51.46    | 42.92    | 40.06 <   |
| 1   | 26 | 9  | 109.55   | -48.65   | 4572.70 < |
| 2   | 26 | 9  | 9.48     | 8.58     | 31.48 <   |
| -11 | 0  | 10 | 479.77   | 698.21   | 77.26 o   |
| -10 | 0  | 10 | 2419.55  | 3496.77  | 194.58 o  |
| -9  | 0  | 10 | 3.93     | 37.20    | 45.78 <   |
| -8  | 0  | 10 | 130.56   | 194.58   | 60.09 o   |
| -7  | 0  | 10 | 18.72    | 8.58     | 28.62 <   |
| -6  | 0  | 10 | 16035.70 | 18350.90 | 892.79 o  |
| -5  | 0  | 10 | 3294.11  | 3422.37  | 271.84 o  |
| -4  | 0  | 10 | 17704.90 | 27885.40 | 1891.46 o |
| -3  | 0  | 10 | 15.27    | 45.78    | 22.89 <   |
| -2  | 0  | 10 | 11749.30 | 14982.90 | 726.82 o  |
| -1  | 0  | 10 | 403.93   | 509.35   | 42.92 o   |
| 1   | 0  | 10 | 827.24   | 901.38   | 85.85 o   |
| 2   | 0  | 10 | 9756.88  | 8049.43  | 397.75 o  |
| 3   | 0  | 10 | 18.90    | 71.54    | 20.03 o   |
| -11 | 1  | 10 | 6.80     | 65.81    | 20.03 o   |
| -10 | 1  | 10 | 0.28     | 34.34    | 22.89 <   |
| -9  | 1  | 10 | 9.80     | 11.45    | 25.75 <   |
| -8  | 1  | 10 | 282.46   | 329.07   | 37.20 o   |
| -7  | 1  | 10 | 714.93   | 881.35   | 48.65 o   |
| -6  | 1  | 10 | 0.15     | 11.45    | 17.17 <   |
| -5  | 1  | 10 | 368.14   | 529.38   | 57.23 o   |
| -4  | 1  | 10 | 79.29    | 62.95    | 22.89 <   |
| -3  | 1  | 10 | 789.75   | 909.96   | 45.78 o   |
| -1  | 1  | 10 | 647.11   | 675.32   | 34.34 o   |
| 0   | 1  | 10 | 1.12     | 8.58     | 11.45 <   |
| 2   | 1  | 10 | 323.31   | 226.06   | 28.62 o   |
| 3   | 1  | 10 | 328.32   | 257.54   | 31.48 o   |
| 4   | 1  | 10 | 34.34    | 37.20    | 11.45 o   |
| 5   | 1  | 10 | 1093.31  | 967.19   | 74.40 o   |
| -11 | 2  | 10 | 83.19    | 60.09    | 20.03 <   |
| -9  | 2  | 10 | 479.51   | 589.47   | 62.95 o   |
| -8  | 2  | 10 | 2514.28  | 3101.88  | 125.91 o  |
| -7  | 2  | 10 | 1.83     | 0.00     | 17.17 <   |
| -5  | 2  | 10 | 3.17     | 77.26    | 34.34 <   |
| -4  | 2  | 10 | 7454.66  | 10418.80 | 509.35 o  |
| -3  | 2  | 10 | 196.49   | 286.15   | 25.75 o   |
| 1   | 2  | 10 | 2237.24  | 2435.15  | 94.43 o   |
| 2   | 2  | 10 | 12884.20 | 11019.70 | 566.58 o  |
| 3   | 2  | 10 | 90.92    | 85.85    | 14.31 o   |
| 5   | 2  | 10 | 0.35     | 40.06    | 17.17 <   |
| -11 | 3  | 10 | 180.17   | 243.23   | 34.34 o   |
| -10 | 3  | 10 | 265.39   | 237.51   | 818.39 <  |
| -9  | 3  | 10 | 344.21   | 346.24   | 51.51 o   |
| -8  | 3  | 10 | 313.49   | 400.61   | 34.34 o   |
| -7  | 3  | 10 | 30.11    | 5.72     | 17.17 <   |

## paulkerrite.cif

|     |   |    |         |         |          |
|-----|---|----|---------|---------|----------|
| -6  | 3 | 10 | 140.98  | 283.29  | 28.62 o  |
| -5  | 3 | 10 | 26.96   | 11.45   | 25.75 <  |
| -4  | 3 | 10 | 3.45    | 51.51   | 20.03 <  |
| -3  | 3 | 10 | 322.76  | 437.81  | 31.48 o  |
| -2  | 3 | 10 | 0.45    | 51.51   | 17.17 <  |
| -1  | 3 | 10 | 1218.51 | 1536.63 | 65.81 o  |
| 0   | 3 | 10 | 0.31    | 8.58    | 11.45 <  |
| 2   | 3 | 10 | 23.40   | 48.65   | 17.17 <  |
| 3   | 3 | 10 | 672.39  | 592.33  | 34.34 o  |
| 4   | 3 | 10 | 163.85  | 131.63  | 17.17 o  |
| 5   | 3 | 10 | 53.12   | 14.31   | 17.17 <  |
| 6   | 3 | 10 | 21.77   | 5.72    | 11.45 <  |
| -11 | 4 | 10 | 40.26   | 85.85   | 25.75 o  |
| -10 | 4 | 10 | 187.06  | 326.21  | 37.20 o  |
| -9  | 4 | 10 | 14.78   | 14.31   | 17.17 <  |
| -8  | 4 | 10 | 174.83  | 194.58  | 25.75 o  |
| -7  | 4 | 10 | 102.81  | 183.14  | 25.75 o  |
| -6  | 4 | 10 | 217.30  | 208.89  | 25.75 o  |
| -5  | 4 | 10 | 703.51  | 812.67  | 54.37 o  |
| -4  | 4 | 10 | 3772.09 | 4584.14 | 194.58 o |
| -1  | 4 | 10 | 1136.86 | 958.61  | 54.37 o  |
| 0   | 4 | 10 | 5426.17 | 5577.09 | 200.31 o |
| 1   | 4 | 10 | 1378.93 | 1173.22 | 45.78 o  |
| 2   | 4 | 10 | 2066.12 | 2615.42 | 137.35 o |
| 3   | 4 | 10 | 713.06  | 543.69  | 34.34 o  |
| 5   | 4 | 10 | 85.42   | 45.78   | 20.03 <  |
| 6   | 4 | 10 | 95.99   | 17.17   | 17.17 <  |
| 7   | 4 | 10 | 11.14   | 2.86    | 14.31 <  |
| -11 | 5 | 10 | 2.21    | -5.72   | 20.03 <  |
| -10 | 5 | 10 | 82.89   | 97.29   | 20.03 o  |
| -9  | 5 | 10 | 188.19  | 206.03  | 31.48 o  |
| -8  | 5 | 10 | 27.58   | 40.06   | 22.89 <  |
| -7  | 5 | 10 | 8.23    | 0.00    | 14.31 <  |
| -6  | 5 | 10 | 414.44  | 383.44  | 28.62 o  |
| -5  | 5 | 10 | 793.63  | 1035.87 | 54.37 o  |
| -4  | 5 | 10 | 2.42    | 14.31   | 14.31 <  |
| -3  | 5 | 10 | 88.41   | 123.04  | 20.03 o  |
| -2  | 5 | 10 | 76.42   | 71.54   | 17.17 o  |
| -1  | 5 | 10 | 628.71  | 743.99  | 42.92 o  |
| 0   | 5 | 10 | 42.64   | 62.95   | 14.31 o  |
| 2   | 5 | 10 | 6.50    | 25.75   | 14.31 <  |
| 3   | 5 | 10 | 62.12   | 74.40   | 17.17 o  |
| 4   | 5 | 10 | 10.11   | 5.72    | 14.31 <  |
| 5   | 5 | 10 | 439.42  | -34.34  | 125.91 < |
| 7   | 5 | 10 | 122.11  | 108.74  | 20.03 o  |
| -11 | 6 | 10 | 209.20  | 165.97  | 45.78 o  |
| -10 | 6 | 10 | 570.35  | 529.38  | 271.84 < |
| -9  | 6 | 10 | 519.47  | 689.62  | 60.09 o  |
| -8  | 6 | 10 | 3575.71 | 3951.75 | 208.89 o |
| -7  | 6 | 10 | 728.57  | 509.35  | 40.06 o  |
| -5  | 6 | 10 | 409.95  | 440.67  | 31.48 o  |
| -3  | 6 | 10 | 831.84  | 841.28  | 48.65 o  |
| -2  | 6 | 10 | 3289.44 | 4020.42 | 157.38 o |
| -1  | 6 | 10 | 41.16   | 71.54   | 14.31 o  |

## paulkerrite.cif

|     |   |    |          |         |          |
|-----|---|----|----------|---------|----------|
| 0   | 6 | 10 | 412.67   | 409.20  | 28.62 o  |
| 1   | 6 | 10 | 71.05    | 45.78   | 14.31 o  |
| 2   | 6 | 10 | 4879.60  | 4109.13 | 234.64 o |
| 4   | 6 | 10 | 14312.30 | 9943.75 | 683.90 o |
| 5   | 6 | 10 | 918.02   | 609.50  | 57.23 o  |
| 7   | 6 | 10 | 992.56   | 861.32  | 88.71 o  |
| 8   | 6 | 10 | 3977.52  | -74.40  | 835.56 < |
| -10 | 7 | 10 | 0.12     | 2.86    | 14.31 <  |
| -9  | 7 | 10 | 53.12    | 34.34   | 17.17 <  |
| -8  | 7 | 10 | 55.51    | 45.78   | 17.17 <  |
| -7  | 7 | 10 | 299.24   | 297.60  | 34.34 o  |
| -6  | 7 | 10 | 245.34   | 237.51  | 25.75 o  |
| -5  | 7 | 10 | 226.70   | 203.17  | 25.75 o  |
| -4  | 7 | 10 | 144.56   | 154.52  | 22.89 o  |
| -3  | 7 | 10 | 1.21     | 5.72    | 11.45 <  |
| -2  | 7 | 10 | 12.56    | 42.92   | 14.31 <  |
| -1  | 7 | 10 | 0.30     | 5.72    | 11.45 <  |
| 0   | 7 | 10 | 118.48   | 200.31  | 20.03 o  |
| 1   | 7 | 10 | 0.17     | 2.86    | 11.45 <  |
| 2   | 7 | 10 | 138.42   | 220.34  | 28.62 o  |
| 3   | 7 | 10 | 11.98    | 8.58    | 11.45 <  |
| 4   | 7 | 10 | 43.59    | 22.89   | 11.45 <  |
| 6   | 7 | 10 | 315.95   | 280.43  | 40.06 o  |
| 7   | 7 | 10 | 489.54   | 520.79  | 42.92 o  |
| 8   | 7 | 10 | 46.77    | 22.89   | 117.32 < |
| 9   | 7 | 10 | 131.92   | 85.85   | 31.48 <  |
| -10 | 8 | 10 | 278.44   | 234.64  | 28.62 o  |
| -9  | 8 | 10 | 484.09   | 695.35  | 51.51 o  |
| -8  | 8 | 10 | 161.28   | 297.60  | 40.06 o  |
| -7  | 8 | 10 | 601.77   | 686.76  | 57.23 o  |
| -6  | 8 | 10 | 406.98   | 208.89  | 197.44 < |
| -5  | 8 | 10 | 326.35   | 243.23  | 60.09 o  |
| -3  | 8 | 10 | 128.44   | 197.44  | 34.34 o  |
| -2  | 8 | 10 | 108.11   | 206.03  | 22.89 o  |
| -1  | 8 | 10 | 636.59   | 904.24  | 48.65 o  |
| 0   | 8 | 10 | 2560.87  | 2541.02 | 117.32 o |
| 1   | 8 | 10 | 528.63   | 540.83  | 45.78 o  |
| 2   | 8 | 10 | 366.21   | 549.41  | 42.92 o  |
| 3   | 8 | 10 | 1.65     | 14.31   | 11.45 <  |
| 6   | 8 | 10 | 748.74   | 646.70  | 65.81 o  |
| 7   | 8 | 10 | 1122.99  | 1267.65 | 80.12 o  |
| 8   | 8 | 10 | 20.17    | -2.86   | 22.89 <  |
| 9   | 8 | 10 | 307.93   | 320.49  | 42.92 o  |
| -10 | 9 | 10 | 36.11    | 5.72    | 25.75 <  |
| -9  | 9 | 10 | 18.92    | 11.45   | 14.31 <  |
| -8  | 9 | 10 | 448.84   | 675.32  | 65.81 o  |
| -7  | 9 | 10 | 287.30   | 243.23  | 28.62 o  |
| -6  | 9 | 10 | 12.25    | 28.62   | 14.31 <  |
| -5  | 9 | 10 | 7.28     | 22.89   | 14.31 <  |
| -4  | 9 | 10 | 207.31   | 240.37  | 28.62 o  |
| -3  | 9 | 10 | 330.30   | 397.75  | 31.48 o  |
| -2  | 9 | 10 | 274.15   | 283.29  | 28.62 o  |
| 0   | 9 | 10 | 1.25     | 31.48   | 11.45 <  |
| 1   | 9 | 10 | 1197.25  | 1064.48 | 54.37 o  |

## paulkerrite.cif

|     |    |    |          |          |          |
|-----|----|----|----------|----------|----------|
| 2   | 9  | 10 | 358.82   | 123.04   | 31.48 o  |
| 3   | 9  | 10 | 65.30    | 85.85    | 17.17 o  |
| 4   | 9  | 10 | 265.16   | 108.74   | 31.48 o  |
| 5   | 9  | 10 | 107.18   | -25.75   | 37.20 <  |
| 6   | 9  | 10 | 52.44    | 40.06    | 25.75 <  |
| 7   | 9  | 10 | 278.70   | 217.48   | 31.48 o  |
| 8   | 9  | 10 | 231.03   | 160.24   | 31.48 o  |
| 9   | 9  | 10 | 30.16    | 8.58     | 14.31 <  |
| -10 | 10 | 10 | 2588.23  | 2526.71  | 154.52 o |
| -9  | 10 | 10 | 140.40   | 80.12    | 20.03 o  |
| -8  | 10 | 10 | 1976.31  | 2606.84  | 117.32 o |
| -7  | 10 | 10 | 349.92   | 354.83   | 37.20 o  |
| -6  | 10 | 10 | 192.18   | 120.18   | 20.03 o  |
| -5  | 10 | 10 | 121.82   | 88.71    | 17.17 o  |
| -4  | 10 | 10 | 5090.93  | 6467.02  | 246.09 o |
| -3  | 10 | 10 | 31.73    | 40.06    | 14.31 <  |
| -1  | 10 | 10 | 1188.77  | 1301.99  | 68.68 o  |
| 0   | 10 | 10 | 14194.70 | 17518.20 | 623.81 o |
| 1   | 10 | 10 | 1994.83  | 2312.10  | 108.74 o |
| 2   | 10 | 10 | 4559.63  | 3468.15  | 294.74 o |
| 3   | 10 | 10 | 12.84    | 20.03    | 14.31 <  |
| 5   | 10 | 10 | 5.21     | 25.75    | 20.03 <  |
| 6   | 10 | 10 | 120.75   | 22.89    | 25.75 <  |
| 7   | 10 | 10 | 175.94   | 194.58   | 34.34 o  |
| 8   | 10 | 10 | 1699.47  | 1067.34  | 123.04 o |
| 9   | 10 | 10 | 418.08   | 357.69   | 117.32 o |
| -9  | 11 | 10 | 4.20     | 5.72     | 14.31 <  |
| -8  | 11 | 10 | 49.72    | 37.20    | 40.06 <  |
| -7  | 11 | 10 | 191.70   | 148.80   | 125.91 < |
| -6  | 11 | 10 | 44.38    | 40.06    | 17.17 <  |
| -5  | 11 | 10 | 194.94   | 191.72   | 25.75 o  |
| -4  | 11 | 10 | 127.84   | 157.38   | 22.89 o  |
| -3  | 11 | 10 | 329.75   | 309.04   | 34.34 o  |
| -2  | 11 | 10 | 55.31    | 71.54    | 22.89 o  |
| -1  | 11 | 10 | 5.43     | 34.34    | 14.31 <  |
| 0   | 11 | 10 | 9.45     | 22.89    | 14.31 <  |
| 1   | 11 | 10 | 57.53    | 57.23    | 20.03 <  |
| 2   | 11 | 10 | 1.40     | 14.31    | 11.45 <  |
| 3   | 11 | 10 | 207.37   | 214.61   | 34.34 o  |
| 4   | 11 | 10 | 206.18   | 77.26    | 22.89 o  |
| 6   | 11 | 10 | 0.62     | 5.72     | 22.89 <  |
| 7   | 11 | 10 | 172.30   | 120.18   | 25.75 o  |
| 8   | 11 | 10 | 31.83    | 2.86     | 17.17 <  |
| 9   | 11 | 10 | 0.28     | 2.86     | 14.31 <  |
| -9  | 12 | 10 | 1.12     | 5.72     | 140.21 < |
| -8  | 12 | 10 | 23.94    | 14.31    | 77.26 <  |
| -7  | 12 | 10 | 39.99    | 5.72     | 223.20 < |
| -6  | 12 | 10 | 7688.55  | 7977.89  | 343.38 o |
| -5  | 12 | 10 | 532.52   | 434.95   | 34.34 o  |
| -4  | 12 | 10 | 1410.40  | 1198.97  | 764.02 < |
| -3  | 12 | 10 | 306.22   | 263.26   | 31.48 o  |
| -2  | 12 | 10 | 1202.32  | 1310.57  | 489.32 < |
| -1  | 12 | 10 | 101.33   | 94.43    | 17.17 o  |
| 1   | 12 | 10 | 214.51   | 134.49   | 54.37 <  |

## paulkerrite.cif

|    |    |    |         |         |         |   |
|----|----|----|---------|---------|---------|---|
| 2  | 12 | 10 | 1650.76 | 1075.93 | 123.04  | o |
| 3  | 12 | 10 | 243.10  | 17.17   | 20.03   | < |
| 5  | 12 | 10 | 329.17  | -22.89  | 31.48   | < |
| 7  | 12 | 10 | 163.36  | 211.75  | 48.65   | o |
| 8  | 12 | 10 | 0.33    | 11.45   | 25.75   | < |
| 9  | 12 | 10 | 15.34   | 11.45   | 20.03   | < |
| -9 | 13 | 10 | 20.40   | 0.00    | 20.03   | < |
| -8 | 13 | 10 | 1.87    | 0.00    | 14.31   | < |
| -7 | 13 | 10 | 205.97  | 31.48   | 1819.92 | < |
| -6 | 13 | 10 | 157.09  | 94.43   | 331.93  | < |
| -5 | 13 | 10 | 531.68  | 380.58  | 74.40   | o |
| -4 | 13 | 10 | 28.88   | 25.75   | 125.91  | < |
| -3 | 13 | 10 | 14.62   | 17.17   | 14.31   | < |
| -2 | 13 | 10 | 137.91  | 151.66  | 22.89   | o |
| -1 | 13 | 10 | 83.26   | 203.17  | 37.20   | o |
| 0  | 13 | 10 | 67.48   | 108.74  | 357.69  | < |
| 1  | 13 | 10 | 447.42  | -37.20  | 268.98  | < |
| 2  | 13 | 10 | 214.59  | 148.80  | 148.80  | < |
| 3  | 13 | 10 | 96.82   | 48.65   | 17.17   | < |
| 4  | 13 | 10 | 61.56   | 40.06   | 17.17   | < |
| 5  | 13 | 10 | 403.02  | 60.09   | 303.32  | < |
| 7  | 13 | 10 | 425.32  | 389.17  | 45.78   | o |
| 8  | 13 | 10 | 0.85    | -2.86   | 28.62   | < |
| 9  | 13 | 10 | 43.65   | 5.72    | 31.48   | < |
| -8 | 14 | 10 | 1095.58 | 915.68  | 1319.16 | < |
| -7 | 14 | 10 | 47.29   | 37.20   | 889.93  | < |
| -5 | 14 | 10 | 93.42   | 45.78   | 20.03   | < |
| -4 | 14 | 10 | 2172.92 | 2392.22 | 123.04  | o |
| -3 | 14 | 10 | 349.00  | 372.00  | 48.65   | o |
| -1 | 14 | 10 | 233.43  | 85.85   | 145.94  | < |
| 0  | 14 | 10 | 3600.31 | 2355.02 | 220.34  | o |
| 1  | 14 | 10 | 166.17  | 91.57   | 20.03   | o |
| 2  | 14 | 10 | 5364.89 | 6538.55 | 337.66  | o |
| 4  | 14 | 10 | 1950.48 | 517.93  | 3439.54 | < |
| 5  | 14 | 10 | 316.74  | 105.88  | 31.48   | o |
| 7  | 14 | 10 | 0.55    | 2.86    | 17.17   | < |
| 8  | 14 | 10 | 1408.73 | 967.19  | 82.98   | o |
| 9  | 14 | 10 | 650.70  | 71.54   | 349.10  | < |
| -8 | 15 | 10 | 237.83  | 291.87  | 45.78   | o |
| -7 | 15 | 10 | 28.18   | 34.34   | 466.43  | < |
| -6 | 15 | 10 | 152.24  | 171.69  | 615.22  | < |
| -5 | 15 | 10 | 118.58  | 34.34   | 248.95  | < |
| -4 | 15 | 10 | 72.05   | 57.23   | 20.03   | < |
| -3 | 15 | 10 | 63.86   | 48.65   | 537.96  | < |
| -2 | 15 | 10 | 26.77   | 34.34   | 57.23   | < |
| -1 | 15 | 10 | 388.21  | 177.41  | 160.24  | < |
| 0  | 15 | 10 | 1.04    | 5.72    | 17.17   | < |
| 2  | 15 | 10 | 3.21    | 17.17   | 14.31   | < |
| 4  | 15 | 10 | 242.44  | 37.20   | 28.62   | < |
| 5  | 15 | 10 | 97.67   | 51.51   | 17.17   | < |
| 6  | 15 | 10 | 95.03   | 11.45   | 25.75   | < |
| 7  | 15 | 10 | 1.09    | -2.86   | 17.17   | < |
| 8  | 15 | 10 | 175.62  | 54.37   | 25.75   | < |
| 9  | 15 | 10 | 191.33  | 11.45   | 492.18  | < |

## paulkerrite.cif

|    |    |    |         |         |           |
|----|----|----|---------|---------|-----------|
| -7 | 16 | 10 | 18.59   | 0.00    | 17.17 <   |
| -6 | 16 | 10 | 4.10    | -2.86   | 14.31 <   |
| -5 | 16 | 10 | 520.98  | 148.80  | 475.01 <  |
| -4 | 16 | 10 | 253.32  | 74.40   | 283.29 <  |
| -3 | 16 | 10 | 1.19    | -5.72   | 14.31 <   |
| -2 | 16 | 10 | 493.77  | 406.33  | 177.41 <  |
| -1 | 16 | 10 | 1050.19 | 635.26  | 583.75 <  |
| 1  | 16 | 10 | 1196.29 | 1436.48 | 125.91 o  |
| 3  | 16 | 10 | 3.95    | 5.72    | 14.31 <   |
| 4  | 16 | 10 | 179.15  | 125.91  | 28.62 o   |
| 5  | 16 | 10 | 223.22  | 140.21  | 409.20 <  |
| 6  | 16 | 10 | 33.76   | 22.89   | 20.03 <   |
| 7  | 16 | 10 | 39.26   | 8.58    | 17.17 <   |
| 8  | 16 | 10 | 205.44  | 25.75   | 22.89 <   |
| 9  | 16 | 10 | 133.62  | -5.72   | 31.48 <   |
| -7 | 17 | 10 | 5.19    | 2.86    | 20.03 <   |
| -6 | 17 | 10 | 12.60   | 2.86    | 17.17 <   |
| -5 | 17 | 10 | 0.09    | 5.72    | 14.31 <   |
| -4 | 17 | 10 | 77.80   | 65.81   | 20.03 o   |
| -3 | 17 | 10 | 52.19   | 48.65   | 22.89 <   |
| -2 | 17 | 10 | 97.91   | 42.92   | 108.74 <  |
| -1 | 17 | 10 | 176.85  | 2.86    | 326.21 <  |
| 0  | 17 | 10 | 5.32    | 25.75   | 300.46 <  |
| 1  | 17 | 10 | 241.83  | -5.72   | 234.64 <  |
| 2  | 17 | 10 | 6.10    | 40.06   | 14.31 <   |
| 3  | 17 | 10 | 32.44   | 25.75   | 14.31 <   |
| 4  | 17 | 10 | 27.82   | 51.51   | 20.03 <   |
| 5  | 17 | 10 | 23.38   | 11.45   | 17.17 <   |
| 6  | 17 | 10 | 7.88    | -5.72   | 20.03 <   |
| 7  | 17 | 10 | 5.08    | -5.72   | 17.17 <   |
| 8  | 17 | 10 | 25.87   | 2.86    | 25.75 <   |
| -6 | 18 | 10 | 145.16  | 51.51   | 22.89 <   |
| -5 | 18 | 10 | 1.99    | 11.45   | 17.17 <   |
| -4 | 18 | 10 | 3635.72 | 2269.18 | 226.06 o  |
| -3 | 18 | 10 | 1.23    | 0.00    | 17.17 <   |
| -2 | 18 | 10 | 712.69  | -42.92  | 1296.26 < |
| -1 | 18 | 10 | 260.28  | 148.80  | 206.03 <  |
| 0  | 18 | 10 | 83.83   | 74.40   | 449.26 <  |
| 1  | 18 | 10 | 429.94  | -11.45  | 37.20 <   |
| 3  | 18 | 10 | 13.24   | 0.00    | 17.17 <   |
| 4  | 18 | 10 | 3224.61 | 1130.30 | 4896.05 < |
| 5  | 18 | 10 | 9.41    | 20.03   | 20.03 <   |
| 6  | 18 | 10 | 87.44   | 31.48   | 22.89 <   |
| 7  | 18 | 10 | 0.13    | 11.45   | 31.48 <   |
| 8  | 18 | 10 | 1219.88 | 738.27  | 80.12 o   |
| -6 | 19 | 10 | 17.68   | 45.78   | 28.62 <   |
| -5 | 19 | 10 | 1.83    | 2.86    | 17.17 <   |
| -4 | 19 | 10 | 0.24    | 5.72    | 17.17 <   |
| -3 | 19 | 10 | 152.94  | 45.78   | 20.03 <   |
| -2 | 19 | 10 | 27.54   | 5.72    | 14.31 <   |
| -1 | 19 | 10 | 53.02   | 37.20   | 128.77 <  |
| 0  | 19 | 10 | 7.76    | 5.72    | 14.31 <   |
| 1  | 19 | 10 | 2.65    | 17.17   | 14.31 <   |
| 2  | 19 | 10 | 2.80    | 5.72    | 20.03 <   |



## paulkerrite.cif

|    |    |    |         |         |         |   |
|----|----|----|---------|---------|---------|---|
| 3  | 19 | 10 | 27.53   | 77.26   | 22.89   | o |
| 4  | 19 | 10 | 0.06    | 11.45   | 14.31   | < |
| 5  | 19 | 10 | 11.57   | 8.58    | 22.89   | < |
| 6  | 19 | 10 | 3.13    | -2.86   | 22.89   | < |
| 7  | 19 | 10 | 158.07  | 97.29   | 34.34   | < |
| 8  | 19 | 10 | 189.73  | 2.86    | 25.75   | < |
| -5 | 20 | 10 | 176.75  | 145.94  | 45.78   | o |
| -4 | 20 | 10 | 38.05   | 40.06   | 20.03   | < |
| -3 | 20 | 10 | 1.48    | 0.00    | 14.31   | < |
| -2 | 20 | 10 | 617.24  | -22.89  | 729.68  | < |
| -1 | 20 | 10 | 18.91   | 17.17   | 85.85   | < |
| 0  | 20 | 10 | 48.83   | 37.20   | 14.31   | < |
| 1  | 20 | 10 | 9.47    | 11.45   | 25.75   | < |
| 2  | 20 | 10 | 544.72  | -5.72   | 188.86  | < |
| 3  | 20 | 10 | 13.37   | 5.72    | 17.17   | < |
| 4  | 20 | 10 | 62.60   | 68.68   | 20.03   | o |
| 5  | 20 | 10 | 141.67  | 54.37   | 28.62   | < |
| 7  | 20 | 10 | 398.18  | 177.41  | 40.06   | o |
| 8  | 20 | 10 | 12.39   | 2.86    | 20.03   | < |
| -4 | 21 | 10 | 43.08   | 45.78   | 22.89   | < |
| -3 | 21 | 10 | 5.54    | 5.72    | 17.17   | < |
| -2 | 21 | 10 | 94.71   | 11.45   | 326.21  | < |
| -1 | 21 | 10 | 104.83  | 97.29   | 22.89   | o |
| 0  | 21 | 10 | 0.34    | 0.00    | 14.31   | < |
| 1  | 21 | 10 | 187.45  | 145.94  | 25.75   | o |
| 2  | 21 | 10 | 139.64  | 77.26   | 20.03   | o |
| 3  | 21 | 10 | 7.65    | 2.86    | 14.31   | < |
| 4  | 21 | 10 | 20.53   | 25.75   | 14.31   | < |
| 5  | 21 | 10 | 63.48   | 31.48   | 25.75   | < |
| 6  | 21 | 10 | 0.12    | -5.72   | 22.89   | < |
| 7  | 21 | 10 | 40.13   | 2.86    | 25.75   | < |
| -3 | 22 | 10 | 15.46   | 5.72    | 22.89   | < |
| -1 | 22 | 10 | 0.43    | 2.86    | 14.31   | < |
| 1  | 22 | 10 | 6.26    | -8.58   | 20.03   | < |
| 2  | 22 | 10 | 1803.40 | -45.78  | 1671.12 | < |
| 3  | 22 | 10 | 11.26   | 8.58    | 17.17   | < |
| 4  | 22 | 10 | 677.86  | -34.34  | 1087.37 | < |
| -3 | 23 | 10 | 2.49    | 2.86    | 28.62   | < |
| -2 | 23 | 10 | 116.81  | 68.68   | 25.75   | < |
| -1 | 23 | 10 | 52.45   | 31.48   | 22.89   | < |
| 0  | 23 | 10 | 2.59    | 5.72    | 20.03   | < |
| 1  | 23 | 10 | 11.03   | -11.45  | 28.62   | < |
| 2  | 23 | 10 | 105.71  | 131.63  | 42.92   | o |
| 3  | 23 | 10 | 45.79   | -5.72   | 20.03   | < |
| -2 | 24 | 10 | 29.13   | 5.72    | 22.89   | < |
| -1 | 24 | 10 | 1.55    | 5.72    | 20.03   | < |
| 0  | 24 | 10 | 8.54    | 14.31   | 22.89   | < |
| 1  | 24 | 10 | 5.88    | 14.31   | 25.75   | < |
| 2  | 24 | 10 | 0.96    | 2.86    | 31.48   | < |
| 0  | 25 | 10 | 11.00   | 14.31   | 28.62   | < |
| 1  | 25 | 10 | 9.18    | 5.72    | 20.03   | < |
| -9 | 1  | 11 | 1008.49 | 1356.36 | 80.12   | o |
| -8 | 1  | 11 | 41.67   | 65.81   | 20.03   | o |
| -7 | 1  | 11 | 85.96   | 71.54   | 20.03   | o |

## paulkerrite.cif

|     |   |    |          |          |        |   |
|-----|---|----|----------|----------|--------|---|
| -6  | 1 | 11 | 114.49   | 94.43    | 20.03  | o |
| -5  | 1 | 11 | 1.22     | 5.72     | 14.31  | < |
| -4  | 1 | 11 | 625.41   | 772.61   | 65.81  | o |
| -3  | 1 | 11 | 2438.77  | 3210.62  | 171.69 | o |
| -2  | 1 | 11 | 11311.70 | 13397.60 | 463.57 | o |
| 0   | 1 | 11 | 38.18    | 45.78    | 14.31  | o |
| 1   | 1 | 11 | 3596.14  | 4011.84  | 145.94 | o |
| 2   | 1 | 11 | 9727.86  | 9076.71  | 363.41 | o |
| 5   | 1 | 11 | 49.00    | -8.58    | 25.75  | < |
| -10 | 2 | 11 | 103.44   | 203.17   | 25.75  | o |
| -9  | 2 | 11 | 145.09   | 180.27   | 25.75  | o |
| -8  | 2 | 11 | 196.72   | 257.54   | 37.20  | o |
| -6  | 2 | 11 | 12.20    | -11.45   | 17.17  | < |
| -5  | 2 | 11 | 105.25   | 148.80   | 22.89  | o |
| -4  | 2 | 11 | 1.62     | 17.17    | 28.62  | < |
| -3  | 2 | 11 | 322.94   | 331.93   | 31.48  | o |
| -2  | 2 | 11 | 136.64   | 163.11   | 20.03  | o |
| -1  | 2 | 11 | 205.46   | 277.57   | 22.89  | o |
| 0   | 2 | 11 | 33.16    | 40.06    | 14.31  | < |
| 1   | 2 | 11 | 264.94   | 274.70   | 22.89  | o |
| 2   | 2 | 11 | 86.82    | 88.71    | 17.17  | o |
| 3   | 2 | 11 | 260.29   | 220.34   | 25.75  | o |
| 4   | 2 | 11 | 117.12   | 85.85    | 17.17  | o |
| 5   | 2 | 11 | 21.67    | -2.86    | 25.75  | < |
| 6   | 2 | 11 | 157.89   | 123.04   | 17.17  | o |
| -10 | 3 | 11 | 211.00   | 177.41   | 80.12  | < |
| -7  | 3 | 11 | 125.24   | 180.27   | 25.75  | o |
| -6  | 3 | 11 | 491.01   | 683.90   | 42.92  | o |
| -5  | 3 | 11 | 410.52   | 406.33   | 34.34  | o |
| -4  | 3 | 11 | 1231.38  | 1602.45  | 82.98  | o |
| -2  | 3 | 11 | 81.39    | 123.04   | 20.03  | o |
| 0   | 3 | 11 | 3.03     | 11.45    | 11.45  | < |
| 1   | 3 | 11 | 2247.72  | 2375.05  | 111.60 | o |
| 2   | 3 | 11 | 149.80   | 91.57    | 17.17  | o |
| 3   | 3 | 11 | 251.74   | 334.80   | 60.09  | o |
| 5   | 3 | 11 | 716.93   | -60.09   | 672.46 | < |
| 6   | 3 | 11 | 106.11   | 85.85    | 17.17  | o |
| -10 | 4 | 11 | 3.32     | 0.00     | 14.31  | < |
| -9  | 4 | 11 | 0.09     | -2.86    | 14.31  | < |
| -8  | 4 | 11 | 17.96    | 8.58     | 20.03  | < |
| -7  | 4 | 11 | 8.22     | -2.86    | 14.31  | < |
| -6  | 4 | 11 | 11.98    | 31.48    | 17.17  | < |
| -5  | 4 | 11 | 54.70    | 103.01   | 22.89  | o |
| -4  | 4 | 11 | 115.06   | 120.18   | 22.89  | o |
| -3  | 4 | 11 | 21.46    | 34.34    | 17.17  | < |
| -2  | 4 | 11 | 29.97    | 31.48    | 17.17  | < |
| -1  | 4 | 11 | 26.42    | 48.65    | 14.31  | o |
| 0   | 4 | 11 | 212.47   | 266.12   | 25.75  | o |
| 1   | 4 | 11 | 19.58    | 28.62    | 11.45  | < |
| 2   | 4 | 11 | 10.06    | 8.58     | 11.45  | < |
| 3   | 4 | 11 | 11.32    | 2.86     | 11.45  | < |
| 4   | 4 | 11 | 38.92    | -8.58    | 120.18 | < |
| 5   | 4 | 11 | 17.92    | -2.86    | 68.68  | < |
| 6   | 4 | 11 | 4.25     | 5.72     | 14.31  | < |

## paulkerrite.cif

|     |   |    |         |         |           |
|-----|---|----|---------|---------|-----------|
| -10 | 5 | 11 | 1.50    | 5.72    | 17.17 <   |
| -9  | 5 | 11 | 610.27  | 532.24  | 486.46 <  |
| -8  | 5 | 11 | 2530.37 | 3127.63 | 148.80 o  |
| -7  | 5 | 11 | 373.49  | 537.96  | 45.78 o   |
| -6  | 5 | 11 | 1.78    | 0.00    | 14.31 <   |
| -5  | 5 | 11 | 953.28  | 1141.74 | 54.37 o   |
| -4  | 5 | 11 | 7460.51 | 9294.19 | 380.58 o  |
| 0   | 5 | 11 | 4.75    | 31.48   | 11.45 <   |
| 2   | 5 | 11 | 284.28  | 354.83  | 22.89 o   |
| 3   | 5 | 11 | 3015.28 | 1811.34 | 1625.34 < |
| 6   | 5 | 11 | 7.45    | -8.58   | 25.75 <   |
| 7   | 5 | 11 | 368.37  | 366.27  | 31.48 o   |
| -10 | 6 | 11 | 25.96   | 34.34   | 20.03 <   |
| -9  | 6 | 11 | 59.06   | 40.06   | 17.17 <   |
| -8  | 6 | 11 | 3.81    | 0.00    | 14.31 <   |
| -7  | 6 | 11 | 27.82   | 62.95   | 22.89 <   |
| -6  | 6 | 11 | 20.83   | 42.92   | 14.31 <   |
| -5  | 6 | 11 | 0.58    | 2.86    | 14.31 <   |
| -4  | 6 | 11 | 0.77    | -8.58   | 14.31 <   |
| -3  | 6 | 11 | 39.47   | 65.81   | 20.03 o   |
| -2  | 6 | 11 | 0.04    | 5.72    | 11.45 <   |
| -1  | 6 | 11 | 163.94  | 160.24  | 17.17 o   |
| 0   | 6 | 11 | 59.07   | 45.78   | 11.45 o   |
| 1   | 6 | 11 | 62.27   | 85.85   | 14.31 o   |
| 2   | 6 | 11 | 15.56   | 8.58    | 8.58 <    |
| 3   | 6 | 11 | 1.66    | 14.31   | 60.09 <   |
| 4   | 6 | 11 | 43.22   | 8.58    | 100.15 <  |
| 5   | 6 | 11 | 9.30    | 5.72    | 22.89 <   |
| 6   | 6 | 11 | 8.40    | 8.58    | 17.17 <   |
| 7   | 6 | 11 | 0.02    | -2.86   | 17.17 <   |
| -10 | 7 | 11 | 0.21    | 2.86    | 28.62 <   |
| -9  | 7 | 11 | 85.13   | 120.18  | 22.89 o   |
| -8  | 7 | 11 | 88.33   | 37.20   | 243.23 <  |
| -7  | 7 | 11 | 1459.36 | 1407.86 | 71.54 o   |
| -6  | 7 | 11 | 62.59   | 74.40   | 17.17 o   |
| -5  | 7 | 11 | 55.10   | 57.23   | 20.03 <   |
| -4  | 7 | 11 | 7380.37 | 7872.02 | 294.74 o  |
| -3  | 7 | 11 | 912.14  | 1055.90 | 68.68 o   |
| -2  | 7 | 11 | 2418.28 | 2189.06 | 94.43 o   |
| -1  | 7 | 11 | 264.42  | 283.29  | 25.75 o   |
| 0   | 7 | 11 | 107.12  | 108.74  | 17.17 o   |
| 2   | 7 | 11 | 815.93  | 789.78  | 51.51 o   |
| 5   | 7 | 11 | 9.79    | 2.86    | 17.17 <   |
| 6   | 7 | 11 | 88.94   | 14.31   | 22.89 <   |
| 7   | 7 | 11 | 1837.06 | 1596.72 | 128.77 o  |
| 8   | 7 | 11 | 119.00  | -17.17  | 20.03 <   |
| -9  | 8 | 11 | 56.75   | 114.46  | 22.89 o   |
| -8  | 8 | 11 | 0.13    | 2.86    | 14.31 <   |
| -7  | 8 | 11 | 28.24   | 17.17   | 17.17 <   |
| -6  | 8 | 11 | 117.52  | 148.80  | 22.89 o   |
| -5  | 8 | 11 | 6.69    | 20.03   | 14.31 <   |
| -4  | 8 | 11 | 7.68    | 8.58    | 14.31 <   |
| -3  | 8 | 11 | 175.98  | 174.55  | 25.75 o   |
| -2  | 8 | 11 | 33.26   | 77.26   | 22.89 o   |

## paulkerrite.cif

|    |    |    |         |         |           |
|----|----|----|---------|---------|-----------|
| -1 | 8  | 11 | 4.74    | 2.86    | 11.45 <   |
| 0  | 8  | 11 | 399.42  | 472.15  | 34.34 o   |
| 1  | 8  | 11 | 1.23    | 8.58    | 11.45 <   |
| 2  | 8  | 11 | 16.52   | 25.75   | 14.31 <   |
| 3  | 8  | 11 | 86.34   | 60.09   | 14.31 o   |
| 4  | 8  | 11 | 0.37    | 5.72    | 11.45 <   |
| 5  | 8  | 11 | 1.20    | 11.45   | 17.17 <   |
| 6  | 8  | 11 | 44.85   | 2.86    | 22.89 <   |
| 7  | 8  | 11 | 85.69   | 54.37   | 20.03 <   |
| 8  | 8  | 11 | 50.34   | 25.75   | 25.75 <   |
| 9  | 8  | 11 | 0.14    | -28.62  | 366.27 <  |
| -9 | 9  | 11 | 548.19  | 454.98  | 1164.64 < |
| -8 | 9  | 11 | 72.84   | 65.81   | 17.17 o   |
| -7 | 9  | 11 | 429.02  | 440.67  | 120.18 o  |
| -6 | 9  | 11 | 64.15   | 114.46  | 22.89 o   |
| -5 | 9  | 11 | 67.35   | 40.06   | 17.17 <   |
| -3 | 9  | 11 | 717.34  | 769.75  | 57.23 o   |
| -2 | 9  | 11 | 3322.17 | 3745.72 | 208.89 o  |
| -1 | 9  | 11 | 55.90   | 20.03   | 17.17 <   |
| 0  | 9  | 11 | 27.87   | 5.72    | 11.45 <   |
| 1  | 9  | 11 | 1.17    | 5.72    | 11.45 <   |
| 3  | 9  | 11 | 560.52  | 452.12  | 60.09 o   |
| 5  | 9  | 11 | 142.29  | 57.23   | 22.89 <   |
| 6  | 9  | 11 | 17.51   | 8.58    | 22.89 <   |
| 7  | 9  | 11 | 471.87  | 472.15  | 48.65 o   |
| 8  | 9  | 11 | 47.64   | 11.45   | 28.62 <   |
| 9  | 9  | 11 | 548.05  | -51.51  | 54.37 <   |
| -9 | 10 | 11 | 10.18   | 31.48   | 22.89 <   |
| -8 | 10 | 11 | 5.37    | 11.45   | 14.31 <   |
| -7 | 10 | 11 | 110.26  | 65.81   | 20.03 o   |
| -6 | 10 | 11 | 164.69  | 140.21  | 28.62 o   |
| -5 | 10 | 11 | 5.80    | -5.72   | 14.31 <   |
| -4 | 10 | 11 | 49.62   | 31.48   | 14.31 <   |
| -3 | 10 | 11 | 76.46   | 45.78   | 17.17 <   |
| -2 | 10 | 11 | 139.47  | 171.69  | 22.89 o   |
| -1 | 10 | 11 | 0.94    | -2.86   | 11.45 <   |
| 0  | 10 | 11 | 188.13  | 289.01  | 25.75 o   |
| 1  | 10 | 11 | 0.74    | -5.72   | 14.31 <   |
| 2  | 10 | 11 | 99.18   | 5.72    | 163.11 <  |
| 3  | 10 | 11 | 49.61   | 31.48   | 17.17 <   |
| 4  | 10 | 11 | 72.42   | 40.06   | 14.31 <   |
| 5  | 10 | 11 | 25.91   | 11.45   | 20.03 <   |
| 6  | 10 | 11 | 146.24  | -45.78  | 45.78 <   |
| 7  | 10 | 11 | 141.89  | 114.46  | 22.89 o   |
| 8  | 10 | 11 | 10.87   | 11.45   | 14.31 <   |
| -8 | 11 | 11 | 31.46   | 74.40   | 20.03 o   |
| -7 | 11 | 11 | 148.15  | 145.94  | 25.75 o   |
| -6 | 11 | 11 | 534.43  | 721.10  | 784.05 <  |
| -5 | 11 | 11 | 1.65    | 14.31   | 14.31 <   |
| -4 | 11 | 11 | 1046.81 | 1319.16 | 77.26 o   |
| -3 | 11 | 11 | 1294.92 | 1253.34 | 74.40 o   |
| -2 | 11 | 11 | 7024.84 | 8086.63 | 343.38 o  |
| -1 | 11 | 11 | 209.39  | 369.14  | 37.20 o   |
| 0  | 11 | 11 | 7.77    | 65.81   | 17.17 o   |

## paulkerrite.cif

|    |    |    |         |         |         |   |
|----|----|----|---------|---------|---------|---|
| 1  | 11 | 11 | 696.05  | 746.85  | 51.51   | o |
| 5  | 11 | 11 | 3.30    | 0.00    | 20.03   | < |
| 7  | 11 | 11 | 72.61   | 25.75   | 20.03   | < |
| 8  | 11 | 11 | 71.34   | 48.65   | 20.03   | < |
| -8 | 12 | 11 | 1.22    | 11.45   | 14.31   | < |
| -7 | 12 | 11 | 82.14   | 71.54   | 386.30  | < |
| -6 | 12 | 11 | 56.51   | 34.34   | 60.09   | < |
| -5 | 12 | 11 | 25.95   | 37.20   | 17.17   | < |
| -4 | 12 | 11 | 53.95   | 85.85   | 20.03   | o |
| -3 | 12 | 11 | 106.01  | 134.49  | 22.89   | o |
| -2 | 12 | 11 | 0.40    | 48.65   | 37.20   | < |
| -1 | 12 | 11 | 1.76    | -5.72   | 11.45   | < |
| 0  | 12 | 11 | 69.31   | 62.95   | 17.17   | o |
| 1  | 12 | 11 | 0.03    | -2.86   | 14.31   | < |
| 2  | 12 | 11 | 141.12  | 80.12   | 1453.65 | < |
| 3  | 12 | 11 | 16.38   | 28.62   | 20.03   | < |
| 4  | 12 | 11 | 3.24    | 14.31   | 14.31   | < |
| 5  | 12 | 11 | 1.73    | 0.00    | 20.03   | < |
| 6  | 12 | 11 | 130.50  | -57.23  | 45.78   | < |
| 7  | 12 | 11 | 35.22   | 25.75   | 25.75   | < |
| 8  | 12 | 11 | 42.67   | -2.86   | 22.89   | < |
| -8 | 13 | 11 | 536.29  | 397.75  | 406.33  | < |
| -7 | 13 | 11 | 251.78  | 246.09  | 103.01  | < |
| -6 | 13 | 11 | 13.83   | -2.86   | 14.31   | < |
| -5 | 13 | 11 | 94.26   | 137.35  | 31.48   | o |
| -4 | 13 | 11 | 131.02  | 140.21  | 595.19  | < |
| -3 | 13 | 11 | 644.91  | 872.76  | 60.09   | o |
| -2 | 13 | 11 | 2866.30 | 2815.73 | 137.35  | o |
| -1 | 13 | 11 | 1811.18 | 1854.26 | 103.01  | o |
| 0  | 13 | 11 | 50.64   | 51.51   | 51.51   | < |
| 2  | 13 | 11 | 1769.55 | 463.57  | 1436.48 | < |
| 4  | 13 | 11 | 294.46  | 114.46  | 681.04  | < |
| 5  | 13 | 11 | 45.81   | 20.03   | 22.89   | < |
| 6  | 13 | 11 | 1.03    | 2.86    | 25.75   | < |
| 7  | 13 | 11 | 359.77  | 329.07  | 1156.05 | < |
| 8  | 13 | 11 | 662.61  | 383.44  | 65.81   | o |
| -7 | 14 | 11 | 75.03   | 51.51   | 165.97  | < |
| -6 | 14 | 11 | 12.97   | 17.17   | 14.31   | < |
| -5 | 14 | 11 | 19.59   | 11.45   | 14.31   | < |
| -4 | 14 | 11 | 145.96  | 145.94  | 357.69  | < |
| -3 | 14 | 11 | 87.78   | 108.74  | 25.75   | o |
| -2 | 14 | 11 | 264.17  | 148.80  | 40.06   | o |
| -1 | 14 | 11 | 270.35  | 231.78  | 34.34   | o |
| 0  | 14 | 11 | 194.19  | 160.24  | 34.34   | o |
| 1  | 14 | 11 | 242.22  | -48.65  | 692.49  | < |
| 2  | 14 | 11 | 192.12  | 186.00  | 34.34   | o |
| 3  | 14 | 11 | 60.31   | 20.03   | 17.17   | < |
| 4  | 14 | 11 | 38.37   | 42.92   | 17.17   | < |
| 5  | 14 | 11 | 2.30    | 2.86    | 20.03   | < |
| 6  | 14 | 11 | 6.42    | -5.72   | 22.89   | < |
| 7  | 14 | 11 | 48.90   | 25.75   | 20.03   | < |
| 8  | 14 | 11 | 82.25   | 17.17   | 22.89   | < |
| -7 | 15 | 11 | 3.41    | 5.72    | 14.31   | < |
| -6 | 15 | 11 | 28.31   | 20.03   | 17.17   | < |

## paulkerrite.cif

|    |    |    |         |         |         |   |
|----|----|----|---------|---------|---------|---|
| -5 | 15 | 11 | 198.95  | 183.14  | 274.70  | < |
| -4 | 15 | 11 | 2202.89 | 2352.16 | 120.18  | o |
| -3 | 15 | 11 | 1173.60 | 208.89  | 417.78  | < |
| -2 | 15 | 11 | 469.79  | 400.61  | 80.12   | o |
| -1 | 15 | 11 | 806.65  | 557.99  | 397.75  | < |
| 0  | 15 | 11 | 0.05    | -5.72   | 14.31   | < |
| 1  | 15 | 11 | 844.84  | -120.18 | 904.24  | < |
| 4  | 15 | 11 | 2300.17 | 815.53  | 6959.20 | < |
| 5  | 15 | 11 | 46.22   | 34.34   | 80.12   | < |
| 6  | 15 | 11 | 73.87   | 17.17   | 25.75   | < |
| 7  | 15 | 11 | 6.37    | 0.00    | 17.17   | < |
| -7 | 16 | 11 | 6.61    | 2.86    | 28.62   | < |
| -6 | 16 | 11 | 15.37   | 14.31   | 17.17   | < |
| -5 | 16 | 11 | 14.39   | -2.86   | 17.17   | < |
| -4 | 16 | 11 | 1.05    | -8.58   | 17.17   | < |
| -3 | 16 | 11 | 141.41  | 105.88  | 22.89   | o |
| -2 | 16 | 11 | 13.94   | 22.89   | 20.03   | < |
| -1 | 16 | 11 | 3.58    | 2.86    | 17.17   | < |
| 0  | 16 | 11 | 1069.87 | 769.75  | 643.84  | < |
| 1  | 16 | 11 | 5.45    | 5.72    | 14.31   | < |
| 2  | 16 | 11 | 21.23   | 17.17   | 14.31   | < |
| 3  | 16 | 11 | 147.33  | 123.04  | 22.89   | o |
| 4  | 16 | 11 | 12.10   | 2.86    | 14.31   | < |
| 5  | 16 | 11 | 27.44   | 14.31   | 17.17   | < |
| 6  | 16 | 11 | 11.07   | 11.45   | 22.89   | < |
| 7  | 16 | 11 | 54.81   | 17.17   | 17.17   | < |
| 8  | 16 | 11 | 1.05    | 2.86    | 20.03   | < |
| -6 | 17 | 11 | 179.91  | -11.45  | 214.61  | < |
| -5 | 17 | 11 | 395.61  | 131.63  | 163.11  | < |
| -4 | 17 | 11 | 747.84  | 331.93  | 300.46  | < |
| -3 | 17 | 11 | 705.65  | 847.01  | 60.09   | o |
| -2 | 17 | 11 | 120.14  | 145.94  | 25.75   | o |
| -1 | 17 | 11 | 204.31  | 334.80  | 137.35  | < |
| 0  | 17 | 11 | 3.23    | 2.86    | 11.45   | < |
| 1  | 17 | 11 | 536.70  | -22.89  | 2529.58 | < |
| 2  | 17 | 11 | 80.22   | 120.18  | 28.62   | o |
| 3  | 17 | 11 | 395.63  | 111.60  | 306.18  | < |
| 4  | 17 | 11 | 1428.29 | 211.75  | 409.20  | < |
| 6  | 17 | 11 | 58.42   | 11.45   | 37.20   | < |
| 7  | 17 | 11 | 0.12    | 11.45   | 17.17   | < |
| -6 | 18 | 11 | 5.62    | 0.00    | 28.62   | < |
| -5 | 18 | 11 | 0.21    | 2.86    | 20.03   | < |
| -4 | 18 | 11 | 39.02   | 25.75   | 20.03   | < |
| -3 | 18 | 11 | 1.12    | -2.86   | 17.17   | < |
| -2 | 18 | 11 | 7.97    | 5.72    | 17.17   | < |
| -1 | 18 | 11 | 127.69  | 40.06   | 1322.02 | < |
| 0  | 18 | 11 | 6.39    | 2.86    | 14.31   | < |
| 1  | 18 | 11 | 55.70   | 62.95   | 17.17   | o |
| 2  | 18 | 11 | 29.02   | 11.45   | 17.17   | < |
| 3  | 18 | 11 | 11.85   | 5.72    | 17.17   | < |
| 4  | 18 | 11 | 92.85   | 48.65   | 20.03   | < |
| 5  | 18 | 11 | 2.10    | -2.86   | 25.75   | < |
| 6  | 18 | 11 | 22.59   | 5.72    | 20.03   | < |
| 7  | 18 | 11 | 12.85   | 25.75   | 20.03   | < |

## paulkerrite.cif

|    |    |    |          |          |           |
|----|----|----|----------|----------|-----------|
| -5 | 19 | 11 | 0.22     | 8.58     | 28.62 <   |
| -4 | 19 | 11 | 185.89   | 77.26    | 22.89 o   |
| -3 | 19 | 11 | 100.53   | 42.92    | 54.37 <   |
| -2 | 19 | 11 | 1384.66  | -11.45   | 887.07 <  |
| -1 | 19 | 11 | 84.10    | 48.65    | 17.17 <   |
| 0  | 19 | 11 | 24.32    | 20.03    | 14.31 <   |
| 1  | 19 | 11 | 42.34    | 48.65    | 17.17 <   |
| 2  | 19 | 11 | 1072.59  | 34.34    | 1433.62 < |
| 3  | 19 | 11 | 86.42    | 45.78    | 17.17 <   |
| 4  | 19 | 11 | 232.50   | 157.38   | 25.75 o   |
| 5  | 19 | 11 | 4.04     | 11.45    | 22.89 <   |
| 6  | 19 | 11 | 22.65    | 5.72     | 22.89 <   |
| 7  | 19 | 11 | 79.15    | 14.31    | 20.03 <   |
| -4 | 20 | 11 | 8.74     | 31.48    | 25.75 <   |
| -3 | 20 | 11 | 0.15     | 22.89    | 22.89 <   |
| -2 | 20 | 11 | 21.92    | 20.03    | 22.89 <   |
| -1 | 20 | 11 | 6.17     | 11.45    | 14.31 <   |
| 0  | 20 | 11 | 101.14   | 77.26    | 20.03 o   |
| 1  | 20 | 11 | 0.03     | 8.58     | 14.31 <   |
| 2  | 20 | 11 | 1.01     | 11.45    | 14.31 <   |
| 3  | 20 | 11 | 0.34     | -5.72    | 17.17 <   |
| 4  | 20 | 11 | 1.74     | 11.45    | 20.03 <   |
| 5  | 20 | 11 | 0.34     | 28.62    | 22.89 <   |
| 6  | 20 | 11 | 137.89   | 34.34    | 25.75 <   |
| 7  | 20 | 11 | 4.00     | 0.00     | 20.03 <   |
| -3 | 21 | 11 | 312.75   | 280.43   | 60.09 o   |
| -2 | 21 | 11 | 1827.50  | -25.75   | 1021.56 < |
| -1 | 21 | 11 | 51.54    | 11.45    | 17.17 <   |
| 0  | 21 | 11 | 32.92    | 11.45    | 17.17 <   |
| 1  | 21 | 11 | 85.06    | 17.17    | 17.17 <   |
| 2  | 21 | 11 | 1365.08  | -45.78   | 829.84 <  |
| 3  | 21 | 11 | 587.28   | 5.72     | 386.30 <  |
| 4  | 21 | 11 | 73.09    | 2.86     | 25.75 <   |
| 5  | 21 | 11 | 1.37     | 17.17    | 37.20 <   |
| -3 | 22 | 11 | 6.97     | 2.86     | 25.75 <   |
| -2 | 22 | 11 | 219.60   | 14.31    | 483.60 <  |
| -1 | 22 | 11 | 5.64     | -2.86    | 20.03 <   |
| 0  | 22 | 11 | 139.80   | 71.54    | 25.75 <   |
| 1  | 22 | 11 | 18.12    | 2.86     | 20.03 <   |
| 2  | 22 | 11 | 129.98   | 68.68    | 31.48 <   |
| -2 | 23 | 11 | 1261.36  | 844.15   | 111.60 o  |
| -1 | 23 | 11 | 4.30     | 2.86     | 20.03 <   |
| 0  | 23 | 11 | 0.39     | 5.72     | 20.03 <   |
| 1  | 23 | 11 | 1.40     | 11.45    | 20.03 <   |
| -1 | 24 | 11 | 0.20     | 5.72     | 22.89 <   |
| 0  | 24 | 11 | 17.40    | -5.72    | 20.03 <   |
| -9 | 0  | 12 | 846.63   | 1310.57  | 94.43 o   |
| -8 | 0  | 12 | 331.93   | 300.46   | 1994.47 < |
| -7 | 0  | 12 | 928.73   | 1436.48  | 100.15 o  |
| -6 | 0  | 12 | 16129.80 | 21266.80 | 1027.28 o |
| -5 | 0  | 12 | 103.60   | 100.15   | 31.48 o   |
| -4 | 0  | 12 | 2652.26  | 3227.79  | 174.55 o  |
| -3 | 0  | 12 | 1.83     | 48.65    | 37.20 <   |
| -2 | 0  | 12 | 1011.50  | 1513.74  | 128.77 o  |

## paulkerrite.cif

|    |   |    |          |          |         |   |
|----|---|----|----------|----------|---------|---|
| -1 | 0 | 12 | 5229.68  | 5992.01  | 303.32  | o |
| 0  | 0 | 12 | 12111.60 | 14960.00 | 726.82  | o |
| 1  | 0 | 12 | 5687.86  | 5127.83  | 263.26  | o |
| 3  | 0 | 12 | 270.04   | 486.46   | 45.78   | o |
| 5  | 0 | 12 | 23.16    | 42.92    | 14.31   | < |
| -9 | 1 | 12 | 134.29   | 268.98   | 31.48   | o |
| -8 | 1 | 12 | 4.16     | 17.17    | 17.17   | < |
| -7 | 1 | 12 | 3.92     | 25.75    | 17.17   | < |
| -6 | 1 | 12 | 2.04     | 5.72     | 22.89   | < |
| -5 | 1 | 12 | 679.26   | 778.33   | 51.51   | o |
| -4 | 1 | 12 | 44.69    | 54.37    | 17.17   | o |
| -3 | 1 | 12 | 132.08   | 131.63   | 31.48   | o |
| -2 | 1 | 12 | 141.26   | 105.88   | 25.75   | o |
| -1 | 1 | 12 | 493.89   | 506.49   | 31.48   | o |
| 0  | 1 | 12 | 19.23    | 48.65    | 17.17   | < |
| 1  | 1 | 12 | 147.96   | 263.26   | 22.89   | o |
| 2  | 1 | 12 | 207.33   | 131.63   | 20.03   | o |
| 3  | 1 | 12 | 163.53   | 148.80   | 20.03   | o |
| 4  | 1 | 12 | 52.78    | 25.75    | 11.45   | < |
| 5  | 1 | 12 | 636.54   | -131.63  | 1053.04 | < |
| -9 | 2 | 12 | 433.11   | 738.27   | 120.18  | o |
| -8 | 2 | 12 | 2.29     | 5.72     | 17.17   | < |
| -7 | 2 | 12 | 4.98     | 40.06    | 20.03   | < |
| -6 | 2 | 12 | 2237.97  | 2549.61  | 120.18  | o |
| -5 | 2 | 12 | 1.14     | 5.72     | 17.17   | < |
| -3 | 2 | 12 | 46.53    | 17.17    | 20.03   | < |
| -2 | 2 | 12 | 1754.55  | 1808.48  | 85.85   | o |
| -1 | 2 | 12 | 60.22    | 91.57    | 17.17   | o |
| 0  | 2 | 12 | 3737.78  | 3991.81  | 148.80  | o |
| 1  | 2 | 12 | 4.54     | 51.51    | 14.31   | o |
| 2  | 2 | 12 | 2190.92  | 1777.00  | 85.85   | o |
| 3  | 2 | 12 | 1.15     | 14.31    | 14.31   | < |
| 4  | 2 | 12 | 390.73   | 311.90   | 37.20   | o |
| 5  | 2 | 12 | 34.64    | -28.62   | 715.38  | < |
| -9 | 3 | 12 | 136.83   | 85.85    | 77.26   | < |
| -8 | 3 | 12 | 196.03   | 177.41   | 40.06   | o |
| -7 | 3 | 12 | 81.20    | 85.85    | 31.48   | < |
| -6 | 3 | 12 | 8.90     | -2.86    | 17.17   | < |
| -5 | 3 | 12 | 168.26   | 188.86   | 25.75   | o |
| -4 | 3 | 12 | 54.05    | 34.34    | 20.03   | < |
| -3 | 3 | 12 | 172.26   | 168.83   | 25.75   | o |
| -2 | 3 | 12 | 3.03     | 8.58     | 17.17   | < |
| -1 | 3 | 12 | 494.43   | 546.55   | 37.20   | o |
| 0  | 3 | 12 | 0.09     | -8.58    | 14.31   | < |
| 1  | 3 | 12 | 400.00   | 457.84   | 34.34   | o |
| 2  | 3 | 12 | 75.92    | 45.78    | 14.31   | o |
| 3  | 3 | 12 | 55.58    | 57.23    | 17.17   | o |
| 4  | 3 | 12 | 165.61   | 137.35   | 20.03   | o |
| 5  | 3 | 12 | 106.99   | 34.34    | 20.03   | < |
| 6  | 3 | 12 | 61.71    | 0.00     | 20.03   | < |
| -9 | 4 | 12 | 241.29   | 105.88   | 532.24  | < |
| -8 | 4 | 12 | 600.82   | 640.98   | 188.86  | o |
| -7 | 4 | 12 | 907.14   | 1136.02  | 91.57   | o |
| -6 | 4 | 12 | 928.31   | 689.62   | 51.51   | o |



## paulkerrite.cif

|    |   |    |          |          |           |
|----|---|----|----------|----------|-----------|
| -5 | 4 | 12 | 645.41   | 620.95   | 45.78 o   |
| -4 | 4 | 12 | 211.13   | 154.52   | 22.89 o   |
| -3 | 4 | 12 | 72.10    | 74.40    | 20.03 o   |
| -2 | 4 | 12 | 2529.04  | 2772.80  | 163.11 o  |
| -1 | 4 | 12 | 1142.96  | 1462.23  | 77.26 o   |
| 0  | 4 | 12 | 29674.60 | 32358.00 | 1287.68 o |
| 2  | 4 | 12 | 1954.49  | 1822.78  | 108.74 o  |
| 3  | 4 | 12 | 25.86    | 57.23    | 17.17 o   |
| 5  | 4 | 12 | 423.55   | -77.26   | 2515.27 < |
| -9 | 5 | 12 | 0.12     | -2.86    | 14.31 <   |
| -8 | 5 | 12 | 3.01     | 11.45    | 14.31 <   |
| -7 | 5 | 12 | 94.98    | 108.74   | 22.89 o   |
| -6 | 5 | 12 | 28.29    | 25.75    | 17.17 <   |
| -5 | 5 | 12 | 88.75    | 117.32   | 20.03 o   |
| -4 | 5 | 12 | 13.39    | -2.86    | 14.31 <   |
| -3 | 5 | 12 | 374.36   | 349.10   | 34.34 o   |
| -2 | 5 | 12 | 2.81     | 77.26    | 28.62 <   |
| 0  | 5 | 12 | 41.93    | 103.01   | 14.31 o   |
| 1  | 5 | 12 | 1193.04  | 1227.59  | 54.37 o   |
| 2  | 5 | 12 | 211.91   | 180.27   | 25.75 o   |
| 3  | 5 | 12 | 125.95   | 134.49   | 17.17 o   |
| 4  | 5 | 12 | 101.05   | 88.71    | 60.09 <   |
| 5  | 5 | 12 | 27.12    | 28.62    | 22.89 <   |
| 6  | 5 | 12 | 13.45    | -2.86    | 34.34 <   |
| -9 | 6 | 12 | 858.92   | 789.78   | 62.95 o   |
| -8 | 6 | 12 | 100.84   | 143.08   | 22.89 o   |
| -7 | 6 | 12 | 679.49   | 686.76   | 45.78 o   |
| -6 | 6 | 12 | 762.25   | 721.10   | 60.09 o   |
| -5 | 6 | 12 | 3.05     | 20.03    | 14.31 <   |
| -4 | 6 | 12 | 4357.07  | 4618.48  | 183.14 o  |
| -3 | 6 | 12 | 76.98    | 51.51    | 14.31 o   |
| -2 | 6 | 12 | 589.64   | 560.86   | 40.06 o   |
| -1 | 6 | 12 | 263.23   | 412.06   | 31.48 o   |
| 0  | 6 | 12 | 340.65   | 492.18   | 34.34 o   |
| 1  | 6 | 12 | 385.28   | 477.87   | 31.48 o   |
| 2  | 6 | 12 | 757.76   | 289.01   | 62.95 o   |
| 3  | 6 | 12 | 374.22   | 277.57   | 28.62 o   |
| 5  | 6 | 12 | 8.32     | 5.72     | 14.31 <   |
| 6  | 6 | 12 | 537.20   | 475.01   | 54.37 o   |
| 7  | 6 | 12 | 562.54   | -5.72    | 22.89 <   |
| -9 | 7 | 12 | 8.39     | 8.58     | 31.48 <   |
| -8 | 7 | 12 | 35.29    | 71.54    | 20.03 o   |
| -7 | 7 | 12 | 172.19   | 197.44   | 25.75 o   |
| -6 | 7 | 12 | 55.24    | 42.92    | 22.89 <   |
| -5 | 7 | 12 | 101.66   | 94.43    | 20.03 o   |
| -4 | 7 | 12 | 0.55     | -2.86    | 11.45 <   |
| -3 | 7 | 12 | 204.50   | 228.92   | 28.62 o   |
| -2 | 7 | 12 | 10.94    | 11.45    | 11.45 <   |
| -1 | 7 | 12 | 235.38   | 369.14   | 31.48 o   |
| 0  | 7 | 12 | 23.35    | 57.23    | 17.17 o   |
| 1  | 7 | 12 | 446.82   | 463.57   | 28.62 o   |
| 2  | 7 | 12 | 10.17    | 0.00     | 11.45 <   |
| 3  | 7 | 12 | 279.85   | 223.20   | 37.20 o   |
| 4  | 7 | 12 | 0.69     | 0.00     | 11.45 <   |

## paulkerrite.cif

|    |    |    |         |         |           |
|----|----|----|---------|---------|-----------|
| 5  | 7  | 12 | 21.71   | 2.86    | 17.17 <   |
| 6  | 7  | 12 | 56.93   | -2.86   | 692.49 <  |
| 7  | 7  | 12 | 135.46  | 77.26   | 31.48 <   |
| 8  | 7  | 12 | 13.60   | 0.00    | 8.58 <    |
| -8 | 8  | 12 | 857.86  | 709.66  | 2506.68 < |
| -7 | 8  | 12 | 218.12  | 246.09  | 34.34 o   |
| -5 | 8  | 12 | 218.46  | 177.41  | 31.48 o   |
| -4 | 8  | 12 | 59.08   | 37.20   | 14.31 <   |
| -3 | 8  | 12 | 207.23  | 183.14  | 22.89 o   |
| -2 | 8  | 12 | 1617.05 | 1865.71 | 85.85 o   |
| -1 | 8  | 12 | 25.48   | 62.95   | 14.31 o   |
| 0  | 8  | 12 | 5864.24 | 7033.60 | 260.40 o  |
| 1  | 8  | 12 | 37.33   | 51.51   | 20.03 <   |
| 2  | 8  | 12 | 719.23  | 909.96  | 57.23 o   |
| 3  | 8  | 12 | 145.97  | 226.06  | 31.48 o   |
| 4  | 8  | 12 | 1.10    | 11.45   | 11.45 <   |
| 7  | 8  | 12 | 124.43  | 22.89   | 17.17 <   |
| 8  | 8  | 12 | 720.99  | 286.15  | 829.84 <  |
| -8 | 9  | 12 | 16.87   | 11.45   | 14.31 <   |
| -7 | 9  | 12 | 20.94   | 25.75   | 14.31 <   |
| -6 | 9  | 12 | 10.95   | 8.58    | 17.17 <   |
| -5 | 9  | 12 | 101.12  | 111.60  | 20.03 o   |
| -4 | 9  | 12 | 29.68   | 48.65   | 17.17 <   |
| -3 | 9  | 12 | 4.58    | 5.72    | 11.45 <   |
| -2 | 9  | 12 | 437.75  | 495.04  | 37.20 o   |
| -1 | 9  | 12 | 653.92  | 712.52  | 48.65 o   |
| 0  | 9  | 12 | 93.05   | 157.38  | 20.03 o   |
| 1  | 9  | 12 | 358.18  | 409.20  | 37.20 o   |
| 2  | 9  | 12 | 164.54  | 54.37   | 45.78 <   |
| 3  | 9  | 12 | 2.84    | 2.86    | 14.31 <   |
| 4  | 9  | 12 | 33.15   | 31.48   | 14.31 <   |
| 5  | 9  | 12 | 20.42   | 11.45   | 20.03 <   |
| 6  | 9  | 12 | 16.64   | -2.86   | 22.89 <   |
| 7  | 9  | 12 | 2.42    | 2.86    | 14.31 <   |
| 8  | 9  | 12 | 0.26    | -5.72   | 11.45 <   |
| -8 | 10 | 12 | 136.94  | 120.18  | 25.75 o   |
| -7 | 10 | 12 | 0.36    | 31.48   | 17.17 <   |
| -6 | 10 | 12 | 4266.75 | 5308.10 | 211.75 o  |
| -5 | 10 | 12 | 134.41  | 91.57   | 546.55 <  |
| -4 | 10 | 12 | 18.93   | 22.89   | 14.31 <   |
| -3 | 10 | 12 | 2713.87 | 3204.89 | 134.49 o  |
| -2 | 10 | 12 | 2881.87 | 2913.02 | 140.21 o  |
| -1 | 10 | 12 | 8.72    | 22.89   | 14.31 <   |
| 0  | 10 | 12 | 231.62  | 289.01  | 28.62 o   |
| 1  | 10 | 12 | 10.48   | 14.31   | 14.31 <   |
| 3  | 10 | 12 | 1647.92 | 901.38  | 277.57 o  |
| 4  | 10 | 12 | 11.89   | 2.86    | 25.75 <   |
| 5  | 10 | 12 | 515.69  | -54.37  | 1880.01 < |
| 7  | 10 | 12 | 9.50    | 2.86    | 17.17 <   |
| 8  | 10 | 12 | 5.07    | 2.86    | 17.17 <   |
| -8 | 11 | 12 | 2.04    | 5.72    | 25.75 <   |
| -7 | 11 | 12 | 86.01   | 105.88  | 22.89 o   |
| -6 | 11 | 12 | 2.56    | -2.86   | 14.31 <   |
| -5 | 11 | 12 | 136.86  | 134.49  | 22.89 o   |

## paulkerrite.cif

|    |    |    |         |         |           |
|----|----|----|---------|---------|-----------|
| -4 | 11 | 12 | 2.15    | 0.00    | 14.31 <   |
| -3 | 11 | 12 | 25.78   | 14.31   | 14.31 <   |
| -2 | 11 | 12 | 138.04  | 223.20  | 25.75 o   |
| -1 | 11 | 12 | 396.16  | 400.61  | 37.20 o   |
| 0  | 11 | 12 | 1.44    | 2.86    | 11.45 <   |
| 1  | 11 | 12 | 423.20  | 354.83  | 51.51 o   |
| 2  | 11 | 12 | 171.12  | 2.86    | 503.63 <  |
| 3  | 11 | 12 | 27.63   | 5.72    | 248.95 <  |
| 4  | 11 | 12 | 8.66    | 0.00    | 11.45 <   |
| 5  | 11 | 12 | 45.74   | 14.31   | 34.34 <   |
| 6  | 11 | 12 | 1.05    | -8.58   | 40.06 <   |
| 7  | 11 | 12 | 10.32   | 11.45   | 20.03 <   |
| 8  | 11 | 12 | 25.70   | 2.86    | 22.89 <   |
| -7 | 12 | 12 | 75.94   | 48.65   | 77.26 <   |
| -6 | 12 | 12 | 6930.80 | 8055.16 | 560.86 o  |
| -5 | 12 | 12 | 49.48   | 60.09   | 217.48 <  |
| -4 | 12 | 12 | 1140.06 | 1562.39 | 82.98 o   |
| -3 | 12 | 12 | 54.45   | 22.89   | 17.17 <   |
| -2 | 12 | 12 | 371.98  | 506.49  | 42.92 o   |
| -1 | 12 | 12 | 166.79  | 74.40   | 17.17 o   |
| 0  | 12 | 12 | 5114.49 | 6338.25 | 340.52 o  |
| 1  | 12 | 12 | 140.16  | 68.68   | 203.17 <  |
| 2  | 12 | 12 | 47.18   | 5.72    | 71.54 <   |
| 3  | 12 | 12 | 29.66   | 8.58    | 17.17 <   |
| 4  | 12 | 12 | 1248.36 | 672.46  | 91.57 o   |
| 5  | 12 | 12 | 24.37   | 48.65   | 28.62 <   |
| 6  | 12 | 12 | 7058.96 | 9806.40 | 683.90 o  |
| 7  | 12 | 12 | 56.00   | 37.20   | 20.03 <   |
| -7 | 13 | 12 | 335.96  | 277.57  | 137.35 <  |
| -6 | 13 | 12 | 46.47   | 45.78   | 495.04 <  |
| -5 | 13 | 12 | 158.15  | 85.85   | 206.03 <  |
| -4 | 13 | 12 | 70.11   | 37.20   | 22.89 <   |
| -3 | 13 | 12 | 396.68  | 480.73  | 40.06 o   |
| -2 | 13 | 12 | 17.91   | 34.34   | 22.89 <   |
| -1 | 13 | 12 | 5.36    | 0.00    | 14.31 <   |
| 0  | 13 | 12 | 1.87    | 5.72    | 14.31 <   |
| 1  | 13 | 12 | 2.52    | 0.00    | 54.37 <   |
| 2  | 13 | 12 | 24.08   | 11.45   | 183.14 <  |
| 3  | 13 | 12 | 336.14  | 11.45   | 31.48 <   |
| 4  | 13 | 12 | 130.15  | 134.49  | 191.72 <  |
| 5  | 13 | 12 | 202.75  | -22.89  | 1153.19 < |
| 6  | 13 | 12 | 10.38   | 17.17   | 22.89 <   |
| 7  | 13 | 12 | 187.22  | 45.78   | 22.89 <   |
| -7 | 14 | 12 | 0.92    | 22.89   | 28.62 <   |
| -6 | 14 | 12 | 161.13  | 151.66  | 22.89 o   |
| -5 | 14 | 12 | 6.46    | 2.86    | 14.31 <   |
| -4 | 14 | 12 | 1576.64 | 1522.32 | 88.71 o   |
| -3 | 14 | 12 | 874.87  | 412.06  | 626.67 <  |
| -2 | 14 | 12 | 25.92   | 17.17   | 14.31 <   |
| -1 | 14 | 12 | 406.60  | 452.12  | 51.51 o   |
| 1  | 14 | 12 | 282.76  | -54.37  | 145.94 <  |
| 2  | 14 | 12 | 138.80  | 82.98   | 875.62 <  |
| 4  | 14 | 12 | 766.55  | 369.14  | 289.01 <  |
| 5  | 14 | 12 | 29.36   | 17.17   | 20.03 <   |

## paulkerrite.cif

|    |    |    |          |          |           |
|----|----|----|----------|----------|-----------|
| 6  | 14 | 12 | 31.73    | -8.58    | 25.75 <   |
| 7  | 14 | 12 | 16.48    | 14.31    | 17.17 <   |
| -6 | 15 | 12 | 5.35     | -5.72    | 14.31 <   |
| -5 | 15 | 12 | 10.44    | 2.86     | 11.45 <   |
| -4 | 15 | 12 | 65.67    | 34.34    | 97.29 <   |
| -3 | 15 | 12 | 277.36   | 217.48   | 37.20 o   |
| -2 | 15 | 12 | 7.51     | 5.72     | 54.37 <   |
| -1 | 15 | 12 | 82.84    | 48.65    | 20.03 <   |
| 0  | 15 | 12 | 8.25     | 8.58     | 17.17 <   |
| 1  | 15 | 12 | 148.64   | 22.89    | 583.75 <  |
| 2  | 15 | 12 | 26.75    | 25.75    | 14.31 <   |
| 3  | 15 | 12 | 84.11    | 137.35   | 22.89 o   |
| 4  | 15 | 12 | 83.11    | 45.78    | 20.03 <   |
| 5  | 15 | 12 | 4.73     | -2.86    | 20.03 <   |
| 6  | 15 | 12 | 66.94    | 5.72     | 22.89 <   |
| 7  | 15 | 12 | 92.82    | 11.45    | 20.03 <   |
| -6 | 16 | 12 | 61.47    | 37.20    | 34.34 <   |
| -5 | 16 | 12 | 493.55   | 100.15   | 154.52 <  |
| -4 | 16 | 12 | 171.53   | 62.95    | 535.10 <  |
| -3 | 16 | 12 | 337.62   | 148.80   | 143.08 <  |
| -2 | 16 | 12 | 1392.81  | 1007.25  | 134.49 o  |
| -1 | 16 | 12 | 17.07    | 22.89    | 17.17 <   |
| 0  | 16 | 12 | 18127.20 | 28217.40 | 1917.21 o |
| 1  | 16 | 12 | 1.80     | 25.75    | 274.70 <  |
| 2  | 16 | 12 | 1178.31  | 1219.00  | 117.32 o  |
| 3  | 16 | 12 | 369.09   | 165.97   | 34.34 o   |
| 4  | 16 | 12 | 160.05   | 45.78    | 20.03 <   |
| 5  | 16 | 12 | 352.61   | -34.34   | 31.48 <   |
| 6  | 16 | 12 | 111.04   | 8.58     | 37.20 <   |
| 7  | 16 | 12 | 299.70   | -8.58    | 25.75 <   |
| -5 | 17 | 12 | 99.53    | -17.17   | 557.99 <  |
| -4 | 17 | 12 | 12.25    | 28.62    | 22.89 <   |
| -3 | 17 | 12 | 12.94    | 5.72     | 17.17 <   |
| -2 | 17 | 12 | 1.73     | 0.00     | 20.03 <   |
| 0  | 17 | 12 | 2.58     | -2.86    | 14.31 <   |
| 1  | 17 | 12 | 294.16   | -108.74  | 841.28 <  |
| 2  | 17 | 12 | 1.22     | 2.86     | 17.17 <   |
| 3  | 17 | 12 | 1.97     | 0.00     | 14.31 <   |
| 4  | 17 | 12 | 2.83     | 14.31    | 20.03 <   |
| 5  | 17 | 12 | 36.20    | 51.51    | 31.48 <   |
| 6  | 17 | 12 | 0.36     | -2.86    | 20.03 <   |
| 7  | 17 | 12 | 1.89     | -5.72    | 22.89 <   |
| -5 | 18 | 12 | 2.58     | 11.45    | 28.62 <   |
| -4 | 18 | 12 | 382.79   | 248.95   | 60.09 o   |
| -3 | 18 | 12 | 43.79    | 28.62    | 22.89 <   |
| -2 | 18 | 12 | 298.34   | 131.63   | 34.34 o   |
| -1 | 18 | 12 | 40.76    | 25.75    | 17.17 <   |
| 0  | 18 | 12 | 882.28   | -40.06   | 303.32 <  |
| 1  | 18 | 12 | 76.68    | 37.20    | 17.17 <   |
| 2  | 18 | 12 | 395.87   | 2.86     | 34.34 <   |
| 3  | 18 | 12 | 35.71    | 22.89    | 17.17 <   |
| 5  | 18 | 12 | 21.47    | 11.45    | 22.89 <   |
| -4 | 19 | 12 | 2.01     | 5.72     | 20.03 <   |
| -3 | 19 | 12 | 3.78     | 0.00     | 20.03 <   |

## paulkerrite.cif

|    |    |    |         |         |           |
|----|----|----|---------|---------|-----------|
| -2 | 19 | 12 | 133.90  | 25.75   | 20.03 <   |
| -1 | 19 | 12 | 93.35   | 8.58    | 17.17 <   |
| 0  | 19 | 12 | 24.12   | 25.75   | 17.17 <   |
| 1  | 19 | 12 | 45.24   | 48.65   | 17.17 <   |
| 2  | 19 | 12 | 189.09  | 111.60  | 91.57 <   |
| 3  | 19 | 12 | 32.94   | 11.45   | 20.03 <   |
| 4  | 19 | 12 | 27.90   | -2.86   | 20.03 <   |
| 5  | 19 | 12 | 36.59   | 17.17   | 22.89 <   |
| 6  | 19 | 12 | 23.17   | -2.86   | 22.89 <   |
| -3 | 20 | 12 | 8.62    | -5.72   | 22.89 <   |
| -2 | 20 | 12 | 111.30  | 48.65   | 25.75 <   |
| -1 | 20 | 12 | 164.07  | 48.65   | 28.62 <   |
| 0  | 20 | 12 | 431.95  | 5.72    | 566.58 <  |
| 1  | 20 | 12 | 237.68  | 40.06   | 114.46 <  |
| 2  | 20 | 12 | 48.39   | 8.58    | 100.15 <  |
| 3  | 20 | 12 | 0.17    | -2.86   | 31.48 <   |
| 4  | 20 | 12 | 135.46  | -14.31  | 28.62 <   |
| 5  | 20 | 12 | 30.44   | 14.31   | 40.06 <   |
| -2 | 21 | 12 | 94.96   | 34.34   | 25.75 <   |
| -1 | 21 | 12 | 167.97  | 68.68   | 28.62 <   |
| 0  | 21 | 12 | 0.09    | 2.86    | 20.03 <   |
| 1  | 21 | 12 | 92.63   | 37.20   | 37.20 <   |
| -2 | 22 | 12 | 431.54  | 31.48   | 57.23 <   |
| -1 | 22 | 12 | 107.68  | 51.51   | 25.75 <   |
| 0  | 22 | 12 | 364.57  | -11.45  | 260.40 <  |
| -1 | 23 | 12 | 31.72   | -2.86   | 25.75 <   |
| 0  | 23 | 12 | 11.09   | 2.86    | 25.75 <   |
| -8 | 1  | 13 | 1050.29 | 1130.30 | 987.22 <  |
| -7 | 1  | 13 | 1174.89 | 1281.96 | 2498.10 < |
| -6 | 1  | 13 | 1315.24 | 1530.91 | 105.88 o  |
| -5 | 1  | 13 | 569.11  | 489.32  | 566.58 <  |
| -4 | 1  | 13 | 42.93   | 85.85   | 17.17 o   |
| -3 | 1  | 13 | 0.07    | 5.72    | 17.17 <   |
| -2 | 1  | 13 | 4106.23 | 5107.80 | 217.48 o  |
| -1 | 1  | 13 | 62.66   | 168.83  | 25.75 o   |
| 0  | 1  | 13 | 2.20    | 25.75   | 20.03 <   |
| 1  | 1  | 13 | 344.69  | 346.24  | 28.62 o   |
| 2  | 1  | 13 | 3891.68 | 3845.87 | 145.94 o  |
| 3  | 1  | 13 | 72.58   | 82.98   | 17.17 o   |
| 4  | 1  | 13 | 9.34    | 17.17   | 11.45 <   |
| 5  | 1  | 13 | 594.09  | -151.66 | 3273.57 < |
| -8 | 2  | 13 | 1.66    | 31.48   | 17.17 <   |
| -7 | 2  | 13 | 18.07   | -8.58   | 397.75 <  |
| -6 | 2  | 13 | 86.95   | 68.68   | 25.75 <   |
| -5 | 2  | 13 | 0.99    | 2.86    | 14.31 <   |
| -4 | 2  | 13 | 20.50   | 5.72    | 14.31 <   |
| -3 | 2  | 13 | 420.04  | 409.20  | 40.06 o   |
| -2 | 2  | 13 | 256.40  | 297.60  | 31.48 o   |
| -1 | 2  | 13 | 14.39   | 37.20   | 17.17 <   |
| 0  | 2  | 13 | 72.87   | 128.77  | 20.03 o   |
| 1  | 2  | 13 | 108.08  | 134.49  | 20.03 o   |
| 2  | 2  | 13 | 313.08  | 257.54  | 31.48 o   |
| 3  | 2  | 13 | 140.29  | 163.11  | 74.40 <   |
| 4  | 2  | 13 | 3.94    | 0.00    | 137.35 <  |

## paulkerrite.cif

|    |   |    |         |         |          |
|----|---|----|---------|---------|----------|
| 5  | 2 | 13 | 21.68   | 11.45   | 14.31 <  |
| -8 | 3 | 13 | 1032.60 | 1319.16 | 970.05 < |
| -7 | 3 | 13 | 68.32   | 108.74  | 22.89 o  |
| -6 | 3 | 13 | 3.34    | 37.20   | 25.75 <  |
| -5 | 3 | 13 | 23.44   | 51.51   | 20.03 <  |
| -4 | 3 | 13 | 2245.83 | 2475.21 | 103.01 o |
| -3 | 3 | 13 | 508.91  | 729.68  | 42.92 o  |
| -2 | 3 | 13 | 791.28  | 689.62  | 60.09 o  |
| 0  | 3 | 13 | 48.23   | 42.92   | 17.17 <  |
| 1  | 3 | 13 | 1533.53 | 1290.54 | 68.68 o  |
| 2  | 3 | 13 | 769.79  | 784.05  | 42.92 o  |
| 3  | 3 | 13 | 219.20  | 317.63  | 28.62 o  |
| 4  | 3 | 13 | 2681.80 | 2074.60 | 157.38 o |
| 5  | 3 | 13 | 1.80    | -8.58   | 28.62 <  |
| -8 | 4 | 13 | 0.02    | -14.31  | 14.31 <  |
| -7 | 4 | 13 | 9.77    | 8.58    | 14.31 <  |
| -6 | 4 | 13 | 45.46   | 71.54   | 28.62 <  |
| -5 | 4 | 13 | 19.93   | 14.31   | 17.17 <  |
| -4 | 4 | 13 | 3.69    | -8.58   | 14.31 <  |
| -3 | 4 | 13 | 1.83    | -2.86   | 14.31 <  |
| -2 | 4 | 13 | 0.14    | 5.72    | 17.17 <  |
| -1 | 4 | 13 | 13.09   | 17.17   | 20.03 <  |
| 0  | 4 | 13 | 639.00  | 749.72  | 42.92 o  |
| 1  | 4 | 13 | 10.14   | 14.31   | 34.34 <  |
| 2  | 4 | 13 | 8.56    | 8.58    | 11.45 <  |
| 3  | 4 | 13 | 17.72   | 8.58    | 11.45 <  |
| 4  | 4 | 13 | 40.23   | 11.45   | 180.27 < |
| 5  | 4 | 13 | 5.16    | 2.86    | 17.17 <  |
| -8 | 5 | 13 | 1597.05 | 1874.29 | 337.66 o |
| -7 | 5 | 13 | 129.78  | 177.41  | 25.75 o  |
| -6 | 5 | 13 | 64.19   | 28.62   | 20.03 <  |
| -5 | 5 | 13 | 9.85    | 28.62   | 17.17 <  |
| -4 | 5 | 13 | 3754.40 | 3224.92 | 137.35 o |
| -2 | 5 | 13 | 904.14  | 766.89  | 71.54 o  |
| -1 | 5 | 13 | 4299.48 | 5001.92 | 268.98 o |
| 0  | 5 | 13 | 16.00   | 25.75   | 11.45 <  |
| 1  | 5 | 13 | 3241.68 | 3462.43 | 123.04 o |
| 2  | 5 | 13 | 773.05  | 769.75  | 40.06 o  |
| 3  | 5 | 13 | 0.66    | 34.34   | 11.45 o  |
| 5  | 5 | 13 | 76.83   | 57.23   | 22.89 <  |
| 6  | 5 | 13 | 0.96    | -14.31  | 31.48 <  |
| 7  | 5 | 13 | 84.42   | -2.86   | 14.31 <  |
| -8 | 6 | 13 | 3.98    | 57.23   | 25.75 <  |
| -7 | 6 | 13 | 1.18    | -2.86   | 14.31 <  |
| -6 | 6 | 13 | 5.55    | 8.58    | 14.31 <  |
| -5 | 6 | 13 | 4.53    | -2.86   | 20.03 <  |
| -4 | 6 | 13 | 0.05    | 0.00    | 11.45 <  |
| -3 | 6 | 13 | 12.55   | 28.62   | 14.31 <  |
| -2 | 6 | 13 | 95.23   | 77.26   | 17.17 o  |
| -1 | 6 | 13 | 12.18   | 20.03   | 17.17 <  |
| 0  | 6 | 13 | 10.86   | 11.45   | 11.45 <  |
| 1  | 6 | 13 | 26.89   | 28.62   | 14.31 <  |
| 2  | 6 | 13 | 118.90  | 74.40   | 22.89 o  |
| 3  | 6 | 13 | 19.36   | 17.17   | 11.45 <  |

## paulkerrite.cif

|    |    |    |         |         |           |
|----|----|----|---------|---------|-----------|
| 4  | 6  | 13 | 3.02    | 0.00    | 11.45 <   |
| 5  | 6  | 13 | 5.15    | -2.86   | 17.17 <   |
| 6  | 6  | 13 | 0.57    | -5.72   | 20.03 <   |
| -8 | 7  | 13 | 724.32  | 652.42  | 60.09 o   |
| -7 | 7  | 13 | 35.03   | 48.65   | 17.17 <   |
| -6 | 7  | 13 | 415.43  | 369.14  | 42.92 o   |
| -4 | 7  | 13 | 1211.64 | 892.79  | 54.37 o   |
| -3 | 7  | 13 | 257.31  | 240.37  | 28.62 o   |
| -2 | 7  | 13 | 1298.30 | 1164.64 | 62.95 o   |
| -1 | 7  | 13 | 2513.56 | 3356.55 | 137.35 o  |
| 0  | 7  | 13 | 32.88   | 20.03   | 11.45 <   |
| 1  | 7  | 13 | 1425.29 | 1894.32 | 82.98 o   |
| 2  | 7  | 13 | 1172.51 | 1064.48 | 62.95 o   |
| 4  | 7  | 13 | 1202.29 | 337.66  | 137.35 <  |
| 5  | 7  | 13 | 601.15  | -128.77 | 572.30 <  |
| 6  | 7  | 13 | 193.43  | 11.45   | 203.17 <  |
| 7  | 7  | 13 | 48.79   | 11.45   | 14.31 <   |
| -8 | 8  | 13 | 44.91   | 37.20   | 37.20 <   |
| -7 | 8  | 13 | 25.25   | 34.34   | 17.17 <   |
| -6 | 8  | 13 | 48.12   | 31.48   | 17.17 <   |
| -5 | 8  | 13 | 16.90   | 51.51   | 17.17 <   |
| -4 | 8  | 13 | 56.20   | 48.65   | 17.17 <   |
| -3 | 8  | 13 | 0.49    | -2.86   | 11.45 <   |
| -2 | 8  | 13 | 23.43   | 11.45   | 14.31 <   |
| -1 | 8  | 13 | 2.30    | 5.72    | 11.45 <   |
| 0  | 8  | 13 | 136.99  | 154.52  | 22.89 o   |
| 1  | 8  | 13 | 15.17   | 8.58    | 20.03 <   |
| 2  | 8  | 13 | 1.16    | 2.86    | 11.45 <   |
| 3  | 8  | 13 | 7.72    | 2.86    | 22.89 <   |
| 4  | 8  | 13 | 100.32  | 51.51   | 22.89 <   |
| 5  | 8  | 13 | 23.92   | 20.03   | 20.03 <   |
| 6  | 8  | 13 | 113.64  | -37.20  | 786.92 <  |
| 7  | 8  | 13 | 1.76    | -2.86   | 14.31 <   |
| -7 | 9  | 13 | 697.00  | 701.07  | 540.83 <  |
| -6 | 9  | 13 | 34.27   | 20.03   | 14.31 <   |
| -5 | 9  | 13 | 1605.69 | 1762.69 | 2395.09 < |
| -4 | 9  | 13 | 823.88  | 732.55  | 48.65 o   |
| -3 | 9  | 13 | 195.05  | 194.58  | 22.89 o   |
| -2 | 9  | 13 | 3062.45 | 3093.29 | 180.27 o  |
| -1 | 9  | 13 | 18.82   | 48.65   | 17.17 <   |
| 0  | 9  | 13 | 13.84   | 17.17   | 14.31 <   |
| 1  | 9  | 13 | 92.20   | 60.09   | 17.17 o   |
| 2  | 9  | 13 | 2657.69 | 4020.42 | 492.18 o  |
| 3  | 9  | 13 | 165.32  | 131.63  | 652.42 <  |
| 5  | 9  | 13 | 1915.10 | -91.57  | 1287.68 < |
| 6  | 9  | 13 | 5.69    | 0.00    | 22.89 <   |
| 7  | 9  | 13 | 424.32  | 40.06   | 31.48 <   |
| -7 | 10 | 13 | 28.18   | 14.31   | 17.17 <   |
| -6 | 10 | 13 | 52.93   | 31.48   | 17.17 <   |
| -5 | 10 | 13 | 18.63   | 34.34   | 14.31 <   |
| -4 | 10 | 13 | 62.06   | 51.51   | 22.89 <   |
| -3 | 10 | 13 | 30.96   | 11.45   | 14.31 <   |
| -2 | 10 | 13 | 139.86  | 123.04  | 22.89 o   |
| -1 | 10 | 13 | 0.01    | 2.86    | 14.31 <   |

## paulkerrite.cif

|    |    |    |         |         |         |   |
|----|----|----|---------|---------|---------|---|
| 0  | 10 | 13 | 94.26   | 97.29   | 22.89   | o |
| 1  | 10 | 13 | 5.65    | 5.72    | 14.31   | < |
| 2  | 10 | 13 | 126.54  | 120.18  | 786.92  | < |
| 3  | 10 | 13 | 55.30   | 31.48   | 228.92  | < |
| 4  | 10 | 13 | 68.97   | 31.48   | 20.03   | < |
| 5  | 10 | 13 | 13.98   | 0.00    | 34.34   | < |
| 6  | 10 | 13 | 93.95   | 14.31   | 28.62   | < |
| 7  | 10 | 13 | 16.90   | -2.86   | 17.17   | < |
| -7 | 11 | 13 | 1392.40 | 1207.56 | 1865.71 | < |
| -6 | 11 | 13 | 160.28  | 51.51   | 145.94  | < |
| -5 | 11 | 13 | 1212.95 | 995.81  | 669.59  | < |
| -4 | 11 | 13 | 87.56   | 40.06   | 17.17   | < |
| -3 | 11 | 13 | 79.64   | 171.69  | 34.34   | o |
| -2 | 11 | 13 | 5372.02 | 4200.70 | 351.97  | o |
| -1 | 11 | 13 | 41.62   | 51.51   | 14.31   | o |
| 0  | 11 | 13 | 4.66    | 20.03   | 11.45   | < |
| 1  | 11 | 13 | 5.28    | 45.78   | 17.17   | < |
| 2  | 11 | 13 | 5143.71 | -117.32 | 918.54  | < |
| 3  | 11 | 13 | 15.73   | 54.37   | 20.03   | < |
| 4  | 11 | 13 | 124.26  | 62.95   | 25.75   | < |
| 5  | 11 | 13 | 2023.09 | 2804.28 | 234.64  | o |
| 6  | 11 | 13 | 82.83   | 22.89   | 28.62   | < |
| 7  | 11 | 13 | 1012.37 | -11.45  | 40.06   | < |
| -6 | 12 | 13 | 2.43    | 2.86    | 14.31   | < |
| -5 | 12 | 13 | 27.50   | 42.92   | 77.26   | < |
| -4 | 12 | 13 | 23.69   | 14.31   | 17.17   | < |
| -3 | 12 | 13 | 114.81  | 97.29   | 22.89   | o |
| -2 | 12 | 13 | 2.35    | 0.00    | 11.45   | < |
| -1 | 12 | 13 | 74.17   | 68.68   | 17.17   | o |
| 0  | 12 | 13 | 339.08  | 569.44  | 60.09   | o |
| 1  | 12 | 13 | 195.92  | 40.06   | 160.24  | < |
| 2  | 12 | 13 | 2.53    | 5.72    | 14.31   | < |
| 3  | 12 | 13 | 115.06  | 97.29   | 125.91  | < |
| 4  | 12 | 13 | 43.64   | 25.75   | 14.31   | < |
| 5  | 12 | 13 | 28.26   | 14.31   | 25.75   | < |
| 6  | 12 | 13 | 3.00    | 2.86    | 25.75   | < |
| -6 | 13 | 13 | 448.17  | 294.74  | 82.98   | o |
| -5 | 13 | 13 | 84.02   | 62.95   | 563.72  | < |
| -4 | 13 | 13 | 8.65    | 2.86    | 17.17   | < |
| -3 | 13 | 13 | 14.53   | 0.00    | 20.03   | < |
| -2 | 13 | 13 | 726.50  | 546.55  | 45.78   | o |
| -1 | 13 | 13 | 5.57    | 57.23   | 17.17   | o |
| 0  | 13 | 13 | 1.73    | 8.58    | 17.17   | < |
| 1  | 13 | 13 | 24.55   | 40.06   | 17.17   | < |
| 2  | 13 | 13 | 693.90  | -91.57  | 598.06  | < |
| 3  | 13 | 13 | 137.68  | 28.62   | 88.71   | < |
| 4  | 13 | 13 | 40.06   | 11.45   | 20.03   | < |
| 5  | 13 | 13 | 4.79    | 22.89   | 22.89   | < |
| 6  | 13 | 13 | 230.40  | 34.34   | 374.86  | < |
| -6 | 14 | 13 | 22.71   | 54.37   | 31.48   | < |
| -5 | 14 | 13 | 0.23    | 0.00    | 14.31   | < |
| -4 | 14 | 13 | 280.23  | 208.89  | 277.57  | < |
| -3 | 14 | 13 | 0.32    | 5.72    | 11.45   | < |
| -2 | 14 | 13 | 11.27   | 8.58    | 14.31   | < |



## paulkerrite.cif

|    |    |    |         |         |         |   |
|----|----|----|---------|---------|---------|---|
| -1 | 14 | 13 | 30.05   | 14.31   | 22.89   | < |
| 0  | 14 | 13 | 383.83  | 575.16  | 71.54   | o |
| 1  | 14 | 13 | 32.29   | 17.17   | 17.17   | < |
| 2  | 14 | 13 | 6.43    | 8.58    | 14.31   | < |
| 3  | 14 | 13 | 2.17    | 2.86    | 14.31   | < |
| 4  | 14 | 13 | 184.95  | 157.38  | 31.48   | o |
| 5  | 14 | 13 | 2.49    | 11.45   | 20.03   | < |
| 6  | 14 | 13 | 11.79   | 0.00    | 25.75   | < |
| -5 | 15 | 13 | 702.54  | -2.86   | 289.01  | < |
| -4 | 15 | 13 | 878.19  | 82.98   | 151.66  | < |
| -3 | 15 | 13 | 0.75    | -2.86   | 14.31   | < |
| -2 | 15 | 13 | 19.27   | 28.62   | 20.03   | < |
| -1 | 15 | 13 | 2148.87 | 1894.32 | 197.44  | o |
| 0  | 15 | 13 | 12.81   | 14.31   | 17.17   | < |
| 1  | 15 | 13 | 1543.97 | 1562.39 | 397.75  | o |
| 2  | 15 | 13 | 5.74    | 11.45   | 17.17   | < |
| 3  | 15 | 13 | 1.27    | 0.00    | 17.17   | < |
| 4  | 15 | 13 | 986.09  | 8.58    | 34.34   | < |
| 5  | 15 | 13 | 600.77  | -2.86   | 34.34   | < |
| 6  | 15 | 13 | 26.98   | -8.58   | 25.75   | < |
| -5 | 16 | 13 | 29.98   | 45.78   | 31.48   | < |
| -4 | 16 | 13 | 0.07    | 2.86    | 17.17   | < |
| -3 | 16 | 13 | 15.66   | 2.86    | 31.48   | < |
| -2 | 16 | 13 | 31.19   | 28.62   | 20.03   | < |
| -1 | 16 | 13 | 11.31   | 17.17   | 151.66  | < |
| 0  | 16 | 13 | 200.87  | 217.48  | 34.34   | o |
| 1  | 16 | 13 | 5.44    | 5.72    | 14.31   | < |
| 2  | 16 | 13 | 17.44   | 14.31   | 14.31   | < |
| 3  | 16 | 13 | 65.69   | 8.58    | 217.48  | < |
| 4  | 16 | 13 | 0.32    | 11.45   | 25.75   | < |
| 5  | 16 | 13 | 1.37    | 20.03   | 31.48   | < |
| 6  | 16 | 13 | 35.26   | 8.58    | 28.62   | < |
| -4 | 17 | 13 | 1208.20 | 987.22  | 1983.03 | < |
| -3 | 17 | 13 | 54.05   | 34.34   | 25.75   | < |
| -2 | 17 | 13 | 141.31  | 45.78   | 22.89   | < |
| -1 | 17 | 13 | 369.41  | 266.12  | 57.23   | o |
| 0  | 17 | 13 | 2.59    | 2.86    | 14.31   | < |
| 1  | 17 | 13 | 618.08  | -25.75  | 1467.96 | < |
| 2  | 17 | 13 | 96.29   | 22.89   | 17.17   | < |
| 3  | 17 | 13 | 1.40    | 14.31   | 22.89   | < |
| 5  | 17 | 13 | 27.31   | 22.89   | 20.03   | < |
| -4 | 18 | 13 | 1.76    | 0.00    | 25.75   | < |
| -3 | 18 | 13 | 50.48   | 5.72    | 20.03   | < |
| -2 | 18 | 13 | 192.57  | 45.78   | 28.62   | < |
| -1 | 18 | 13 | 11.48   | -2.86   | 22.89   | < |
| 0  | 18 | 13 | 0.06    | -2.86   | 14.31   | < |
| 1  | 18 | 13 | 63.78   | 14.31   | 14.31   | < |
| 2  | 18 | 13 | 338.44  | -14.31  | 1101.68 | < |
| 3  | 18 | 13 | 45.57   | 34.34   | 20.03   | < |
| 4  | 18 | 13 | 0.57    | 2.86    | 22.89   | < |
| 5  | 18 | 13 | 0.37    | 0.00    | 22.89   | < |
| -3 | 19 | 13 | 166.10  | 11.45   | 25.75   | < |
| -1 | 19 | 13 | 128.97  | 25.75   | 25.75   | < |
| 0  | 19 | 13 | 10.22   | 8.58    | 25.75   | < |

## paulkerrite.cif

|    |    |    |         |         |          |
|----|----|----|---------|---------|----------|
| 1  | 19 | 13 | 132.04  | 5.72    | 51.51 <  |
| 2  | 19 | 13 | 686.38  | -11.45  | 40.06 <  |
| 3  | 19 | 13 | 252.42  | 11.45   | 28.62 <  |
| 4  | 19 | 13 | 139.86  | 11.45   | 31.48 <  |
| 5  | 19 | 13 | 309.28  | -14.31  | 37.20 <  |
| -2 | 20 | 13 | 0.59    | -2.86   | 20.03 <  |
| -1 | 20 | 13 | 3.07    | 5.72    | 20.03 <  |
| 0  | 20 | 13 | 39.87   | 0.00    | 20.03 <  |
| -1 | 21 | 13 | 12.75   | -5.72   | 22.89 <  |
| -7 | 0  | 14 | 615.49  | 609.50  | 74.40 o  |
| -6 | 0  | 14 | 3476.11 | 2847.20 | 220.34 o |
| -5 | 0  | 14 | 575.78  | 798.36  | 100.15 o |
| -4 | 0  | 14 | 1.89    | 31.48   | 22.89 <  |
| -3 | 0  | 14 | 3151.03 | 4286.54 | 226.06 o |
| -2 | 0  | 14 | 367.18  | 543.69  | 48.65 o  |
| -1 | 0  | 14 | 646.58  | 600.92  | 54.37 o  |
| 1  | 0  | 14 | 1691.68 | 1227.59 | 125.91 o |
| 2  | 0  | 14 | 514.99  | 549.41  | 48.65 o  |
| 3  | 0  | 14 | 2550.50 | 3184.86 | 183.14 o |
| 4  | 0  | 14 | 4.05    | 40.06   | 20.03 <  |
| 5  | 0  | 14 | 487.70  | 0.00    | 17.17 <  |
| -7 | 1  | 14 | 220.75  | 271.84  | 841.28 < |
| -6 | 1  | 14 | 34.29   | 42.92   | 25.75 <  |
| -5 | 1  | 14 | 80.06   | 125.91  | 34.34 o  |
| -4 | 1  | 14 | 50.61   | 22.89   | 17.17 <  |
| -3 | 1  | 14 | 175.87  | 174.55  | 22.89 o  |
| -2 | 1  | 14 | 792.06  | 789.78  | 48.65 o  |
| -1 | 1  | 14 | 37.52   | 14.31   | 17.17 <  |
| 0  | 1  | 14 | 10.59   | 8.58    | 14.31 <  |
| 1  | 1  | 14 | 11.28   | 8.58    | 14.31 <  |
| 2  | 1  | 14 | 283.66  | 440.67  | 34.34 o  |
| 3  | 1  | 14 | 217.90  | 183.14  | 25.75 o  |
| 4  | 1  | 14 | 143.93  | 54.37   | 168.83 < |
| 5  | 1  | 14 | 153.28  | 131.63  | 25.75 o  |
| -7 | 2  | 14 | 7.70    | 25.75   | 17.17 <  |
| -6 | 2  | 14 | 7.33    | 28.62   | 17.17 <  |
| -5 | 2  | 14 | 124.16  | 91.57   | 28.62 o  |
| -4 | 2  | 14 | 1909.73 | 1596.72 | 97.29 o  |
| -3 | 2  | 14 | 298.61  | 194.58  | 28.62 o  |
| -1 | 2  | 14 | 231.09  | 251.81  | 37.20 o  |
| 0  | 2  | 14 | 22.51   | 123.04  | 28.62 o  |
| 1  | 2  | 14 | 97.39   | 174.55  | 22.89 o  |
| 2  | 2  | 14 | 3667.28 | 3714.24 | 148.80 o |
| 3  | 2  | 14 | 229.58  | 206.03  | 25.75 o  |
| 4  | 2  | 14 | 1262.03 | 855.59  | 88.71 o  |
| 5  | 2  | 14 | 60.59   | 22.89   | 17.17 <  |
| -7 | 3  | 14 | 41.90   | 20.03   | 17.17 <  |
| -6 | 3  | 14 | 10.39   | 11.45   | 14.31 <  |
| -5 | 3  | 14 | 49.71   | 31.48   | 20.03 <  |
| -4 | 3  | 14 | 49.12   | 54.37   | 20.03 <  |
| -3 | 3  | 14 | 216.41  | 254.68  | 31.48 o  |
| -2 | 3  | 14 | 3.77    | 8.58    | 20.03 <  |
| -1 | 3  | 14 | 537.88  | 492.18  | 48.65 o  |
| 0  | 3  | 14 | 3.15    | -8.58   | 168.83 < |

## paulkerrite.cif

|    |   |    |         |         |           |
|----|---|----|---------|---------|-----------|
| 1  | 3 | 14 | 370.68  | 578.03  | 42.92 o   |
| 2  | 3 | 14 | 22.74   | 28.62   | 20.03 <   |
| 3  | 3 | 14 | 140.99  | 125.91  | 20.03 o   |
| 4  | 3 | 14 | 14.63   | 14.31   | 11.45 <   |
| 5  | 3 | 14 | 77.66   | 37.20   | 20.03 <   |
| -7 | 4 | 14 | 75.24   | 5.72    | 14.31 <   |
| -6 | 4 | 14 | 175.38  | 148.80  | 22.89 o   |
| -5 | 4 | 14 | 88.26   | 45.78   | 22.89 <   |
| -4 | 4 | 14 | 662.80  | 529.38  | 42.92 o   |
| -3 | 4 | 14 | 911.03  | 869.90  | 60.09 o   |
| -2 | 4 | 14 | 7.94    | 54.37   | 128.77 <  |
| -1 | 4 | 14 | 102.24  | 97.29   | 22.89 o   |
| 0  | 4 | 14 | 3947.93 | 4707.19 | 246.09 o  |
| 1  | 4 | 14 | 255.95  | 266.12  | 25.75 o   |
| 2  | 4 | 14 | 112.58  | 103.01  | 17.17 o   |
| 3  | 4 | 14 | 876.04  | 1030.14 | 57.23 o   |
| 5  | 4 | 14 | 99.63   | 48.65   | 22.89 <   |
| 6  | 4 | 14 | 48.71   | 11.45   | 17.17 <   |
| -7 | 5 | 14 | 7.94    | 0.00    | 14.31 <   |
| -6 | 5 | 14 | 3.22    | -5.72   | 14.31 <   |
| -5 | 5 | 14 | 250.25  | 257.54  | 54.37 o   |
| -4 | 5 | 14 | 170.89  | 131.63  | 25.75 o   |
| -3 | 5 | 14 | 14.91   | 25.75   | 14.31 <   |
| -2 | 5 | 14 | 24.25   | 17.17   | 14.31 <   |
| -1 | 5 | 14 | 248.41  | 300.46  | 34.34 o   |
| 0  | 5 | 14 | 31.83   | 54.37   | 20.03 <   |
| 1  | 5 | 14 | 422.78  | 420.64  | 28.62 o   |
| 2  | 5 | 14 | 0.25    | 5.72    | 11.45 <   |
| 3  | 5 | 14 | 8.62    | 0.00    | 11.45 <   |
| 4  | 5 | 14 | 35.74   | 28.62   | 492.18 <  |
| 5  | 5 | 14 | 265.73  | -20.03  | 1319.16 < |
| 6  | 5 | 14 | 12.72   | 2.86    | 28.62 <   |
| -7 | 6 | 14 | 573.13  | 397.75  | 1940.10 < |
| -6 | 6 | 14 | 332.91  | 635.26  | 177.41 o  |
| -5 | 6 | 14 | 685.21  | 469.29  | 48.65 o   |
| -3 | 6 | 14 | 10.48   | 14.31   | 17.17 <   |
| -2 | 6 | 14 | 903.18  | 809.81  | 57.23 o   |
| 0  | 6 | 14 | 23.55   | 25.75   | 20.03 <   |
| 1  | 6 | 14 | 331.98  | 412.06  | 31.48 o   |
| 2  | 6 | 14 | 1224.83 | 1259.07 | 68.68 o   |
| 3  | 6 | 14 | 8.22    | 22.89   | 14.31 <   |
| 5  | 6 | 14 | 415.93  | -25.75  | 294.74 <  |
| 6  | 6 | 14 | 176.86  | 183.14  | 40.06 o   |
| -7 | 7 | 14 | 16.40   | 14.31   | 31.48 <   |
| -6 | 7 | 14 | 10.49   | 5.72    | 14.31 <   |
| -5 | 7 | 14 | 132.86  | 105.88  | 22.89 o   |
| -4 | 7 | 14 | 128.21  | 105.88  | 22.89 o   |
| -3 | 7 | 14 | 82.71   | 45.78   | 22.89 <   |
| -2 | 7 | 14 | 101.47  | 131.63  | 231.78 <  |
| -1 | 7 | 14 | 0.19    | 0.00    | 11.45 <   |
| 0  | 7 | 14 | 0.44    | 2.86    | 11.45 <   |
| 1  | 7 | 14 | 29.00   | 8.58    | 11.45 <   |
| 2  | 7 | 14 | 53.28   | 62.95   | 609.50 <  |
| 3  | 7 | 14 | 292.95  | 31.48   | 45.78 <   |

## paulkerrite.cif

|    |    |    |         |         |           |
|----|----|----|---------|---------|-----------|
| 4  | 7  | 14 | 56.78   | 34.34   | 22.89 <   |
| 5  | 7  | 14 | 122.88  | 74.40   | 22.89 o   |
| 6  | 7  | 14 | 10.70   | -2.86   | 20.03 <   |
| -7 | 8  | 14 | 33.40   | 8.58    | 28.62 <   |
| -6 | 8  | 14 | 180.83  | 91.57   | 995.81 <  |
| -5 | 8  | 14 | 1.10    | 22.89   | 14.31 <   |
| -4 | 8  | 14 | 674.06  | 509.35  | 42.92 o   |
| -3 | 8  | 14 | 959.65  | 1284.82 | 77.26 o   |
| -2 | 8  | 14 | 30.02   | 62.95   | 17.17 o   |
| -1 | 8  | 14 | 11.23   | 37.20   | 14.31 <   |
| 0  | 8  | 14 | 244.32  | 125.91  | 108.74 <  |
| 1  | 8  | 14 | 6.44    | 14.31   | 14.31 <   |
| 2  | 8  | 14 | 9.01    | 37.20   | 14.31 <   |
| 3  | 8  | 14 | 1299.79 | -80.12  | 403.47 <  |
| 4  | 8  | 14 | 698.78  | 11.45   | 40.06 <   |
| 5  | 8  | 14 | 3.45    | 11.45   | 20.03 <   |
| 6  | 8  | 14 | 346.31  | -74.40  | 907.10 <  |
| -6 | 9  | 14 | 118.39  | 120.18  | 22.89 o   |
| -5 | 9  | 14 | 34.25   | 40.06   | 17.17 <   |
| -4 | 9  | 14 | 15.49   | -2.86   | 20.03 <   |
| -3 | 9  | 14 | 246.24  | 206.03  | 28.62 o   |
| -2 | 9  | 14 | 9.57    | 5.72    | 14.31 <   |
| -1 | 9  | 14 | 178.76  | 191.72  | 1439.34 < |
| 0  | 9  | 14 | 12.10   | 11.45   | 11.45 <   |
| 1  | 9  | 14 | 198.67  | 266.12  | 583.75 <  |
| 2  | 9  | 14 | 76.08   | 31.48   | 31.48 <   |
| 3  | 9  | 14 | 351.17  | -22.89  | 417.78 <  |
| 4  | 9  | 14 | 37.81   | 14.31   | 20.03 <   |
| 5  | 9  | 14 | 1.38    | 8.58    | 31.48 <   |
| 6  | 9  | 14 | 0.15    | -5.72   | 22.89 <   |
| -6 | 10 | 14 | 13.17   | 0.00    | 14.31 <   |
| -5 | 10 | 14 | 50.33   | 91.57   | 20.03 o   |
| -4 | 10 | 14 | 2069.75 | 2054.57 | 111.60 o  |
| -3 | 10 | 14 | 765.10  | 555.13  | 60.09 o   |
| -2 | 10 | 14 | 2589.74 | 3462.43 | 194.58 o  |
| -1 | 10 | 14 | 1413.07 | 1350.63 | 80.12 o   |
| 0  | 10 | 14 | 127.26  | 237.51  | 31.48 o   |
| 1  | 10 | 14 | 1693.51 | 2203.36 | 128.77 o  |
| 2  | 10 | 14 | 3273.34 | -114.46 | 712.52 <  |
| 3  | 10 | 14 | 571.94  | -51.51  | 555.13 <  |
| 5  | 10 | 14 | 36.49   | 125.91  | 42.92 <   |
| 6  | 10 | 14 | 0.28    | 11.45   | 37.20 <   |
| -6 | 11 | 14 | 16.96   | 17.17   | 31.48 <   |
| -5 | 11 | 14 | 38.20   | 22.89   | 22.89 <   |
| -4 | 11 | 14 | 1.18    | 2.86    | 14.31 <   |
| -3 | 11 | 14 | 232.45  | 143.08  | 22.89 o   |
| -2 | 11 | 14 | 287.45  | 240.37  | 48.65 o   |
| -1 | 11 | 14 | 64.77   | 45.78   | 14.31 o   |
| 0  | 11 | 14 | 11.27   | 8.58    | 14.31 <   |
| 1  | 11 | 14 | 107.34  | 103.01  | 595.19 <  |
| 2  | 11 | 14 | 73.54   | 105.88  | 134.49 <  |
| 3  | 11 | 14 | 200.75  | 128.77  | 3036.06 < |
| 4  | 11 | 14 | 10.90   | -2.86   | 20.03 <   |
| 5  | 11 | 14 | 8.65    | 17.17   | 22.89 <   |

## paulkerrite.cif

|    |    |    |         |        |           |
|----|----|----|---------|--------|-----------|
| -5 | 12 | 14 | 12.05   | 17.17  | 17.17 <   |
| -4 | 12 | 14 | 1.18    | 11.45  | 14.31 <   |
| -3 | 12 | 14 | 646.35  | 254.68 | 68.68 o   |
| -2 | 12 | 14 | 195.96  | 148.80 | 31.48 o   |
| -1 | 12 | 14 | 551.52  | 317.63 | 45.78 o   |
| 0  | 12 | 14 | 256.81  | 91.57  | 25.75 o   |
| 1  | 12 | 14 | 838.84  | 486.46 | 57.23 o   |
| 2  | 12 | 14 | 343.60  | 85.85  | 191.72 <  |
| 4  | 12 | 14 | 24.75   | 28.62  | 25.75 <   |
| 5  | 12 | 14 | 3.55    | 5.72   | 22.89 <   |
| -5 | 13 | 14 | 161.40  | 45.78  | 31.48 <   |
| -4 | 13 | 14 | 346.28  | 123.04 | 54.37 <   |
| -3 | 13 | 14 | 20.54   | -5.72  | 14.31 <   |
| -2 | 13 | 14 | 121.49  | 34.34  | 4807.34 < |
| -1 | 13 | 14 | 9.20    | 28.62  | 17.17 <   |
| 0  | 13 | 14 | 25.90   | 42.92  | 25.75 <   |
| 1  | 13 | 14 | 0.51    | 17.17  | 17.17 <   |
| 2  | 13 | 14 | 232.79  | 37.20  | 274.70 <  |
| 3  | 13 | 14 | 90.19   | 14.31  | 42.92 <   |
| 4  | 13 | 14 | 167.35  | 280.43 | 57.23 o   |
| 5  | 13 | 14 | 214.16  | 214.61 | 54.37 o   |
| -5 | 14 | 14 | 775.29  | 557.99 | 2000.20 < |
| -4 | 14 | 14 | 1192.37 | 995.81 | 643.84 <  |
| -3 | 14 | 14 | 641.68  | 226.06 | 583.75 <  |
| -2 | 14 | 14 | 826.85  | 386.30 | 80.12 o   |
| -1 | 14 | 14 | 215.50  | 91.57  | 543.69 <  |
| 0  | 14 | 14 | 10.42   | 11.45  | 17.17 <   |
| 1  | 14 | 14 | 388.51  | 5.72   | 248.95 <  |
| 2  | 14 | 14 | 807.94  | 658.15 | 506.49 <  |
| 4  | 14 | 14 | 1127.16 | 5.72   | 34.34 <   |
| 5  | 14 | 14 | 557.57  | -5.72  | 31.48 <   |
| -4 | 15 | 14 | 7.58    | 0.00   | 22.89 <   |
| -3 | 15 | 14 | 63.96   | 28.62  | 177.41 <  |
| -2 | 15 | 14 | 0.33    | 2.86   | 20.03 <   |
| -1 | 15 | 14 | 63.71   | 17.17  | 20.03 <   |
| 0  | 15 | 14 | 4.13    | 2.86   | 17.17 <   |
| 1  | 15 | 14 | 55.99   | 22.89  | 14.31 <   |
| 2  | 15 | 14 | 32.83   | 5.72   | 14.31 <   |
| 3  | 15 | 14 | 34.68   | 51.51  | 25.75 <   |
| 4  | 15 | 14 | 22.66   | 8.58   | 34.34 <   |
| 5  | 15 | 14 | 299.18  | 171.69 | 62.95 <   |
| -4 | 16 | 14 | 277.56  | 131.63 | 45.78 <   |
| -3 | 16 | 14 | 1232.84 | 309.04 | 1676.85 < |
| -2 | 16 | 14 | 7.91    | -2.86  | 22.89 <   |
| -1 | 16 | 14 | 0.49    | 2.86   | 17.17 <   |
| 1  | 16 | 14 | 13.17   | 8.58   | 14.31 <   |
| 2  | 16 | 14 | 46.87   | 31.48  | 22.89 <   |
| 3  | 16 | 14 | 1465.87 | -17.17 | 1696.88 < |
| 4  | 16 | 14 | 144.43  | 197.44 | 54.37 o   |
| 5  | 16 | 14 | 465.05  | 5.72   | 31.48 <   |
| -3 | 17 | 14 | 5.97    | 5.72   | 22.89 <   |
| -2 | 17 | 14 | 8.93    | -5.72  | 17.17 <   |
| -1 | 17 | 14 | 255.63  | 85.85  | 31.48 <   |
| 0  | 17 | 14 | 0.12    | 5.72   | 20.03 <   |

## paulkerrite.cif

|    |    |    |         |         |           |
|----|----|----|---------|---------|-----------|
| 1  | 17 | 14 | 188.27  | -5.72   | 22.89 <   |
| 2  | 17 | 14 | 27.46   | 2.86    | 20.03 <   |
| 3  | 17 | 14 | 0.11    | 11.45   | 22.89 <   |
| 4  | 17 | 14 | 0.09    | 0.00    | 22.89 <   |
| -3 | 18 | 14 | 180.72  | 5.72    | 34.34 <   |
| -2 | 18 | 14 | 704.62  | 234.64  | 640.98 <  |
| -1 | 18 | 14 | 82.79   | 5.72    | 22.89 <   |
| 0  | 18 | 14 | 0.06    | -8.58   | 20.03 <   |
| 3  | 18 | 14 | 142.48  | 5.72    | 31.48 <   |
| 4  | 18 | 14 | 599.19  | 2.86    | 37.20 <   |
| -2 | 19 | 14 | 233.10  | 34.34   | 25.75 <   |
| -1 | 19 | 14 | 4.51    | 2.86    | 20.03 <   |
| -6 | 1  | 15 | 64.32   | 54.37   | 20.03 <   |
| -5 | 1  | 15 | 1.06    | 11.45   | 14.31 <   |
| -4 | 1  | 15 | 95.40   | 174.55  | 28.62 o   |
| -3 | 1  | 15 | 697.96  | 535.10  | 74.40 o   |
| -2 | 1  | 15 | 1274.40 | 1253.34 | 71.54 o   |
| -1 | 1  | 15 | 2310.55 | 2724.16 | 128.77 o  |
| 0  | 1  | 15 | 0.45    | 11.45   | 22.89 <   |
| 1  | 1  | 15 | 2121.18 | 2223.39 | 137.35 o  |
| 2  | 1  | 15 | 1454.77 | 1173.22 | 74.40 o   |
| 4  | 1  | 15 | 9.55    | 40.06   | 22.89 <   |
| 5  | 1  | 15 | 20.89   | 2.86    | 206.03 <  |
| -6 | 2  | 15 | 303.04  | 357.69  | 31.48 o   |
| -5 | 2  | 15 | 0.12    | -14.31  | 14.31 <   |
| -4 | 2  | 15 | 57.06   | 57.23   | 22.89 <   |
| -3 | 2  | 15 | 109.53  | 37.20   | 22.89 <   |
| -2 | 2  | 15 | 0.42    | 2.86    | 14.31 <   |
| -1 | 2  | 15 | 0.64    | 5.72    | 14.31 <   |
| 0  | 2  | 15 | 411.69  | 412.06  | 40.06 o   |
| 1  | 2  | 15 | 8.10    | 11.45   | 17.17 <   |
| 2  | 2  | 15 | 0.44    | 14.31   | 11.45 <   |
| 3  | 2  | 15 | 105.90  | 91.57   | 20.03 o   |
| 4  | 2  | 15 | 18.80   | 22.89   | 11.45 <   |
| 5  | 2  | 15 | 44.61   | -2.86   | 28.62 <   |
| -6 | 3  | 15 | 36.17   | 17.17   | 20.03 <   |
| -5 | 3  | 15 | 327.83  | 260.40  | 1030.14 < |
| -4 | 3  | 15 | 18.60   | 8.58    | 28.62 <   |
| -3 | 3  | 15 | 1613.40 | 1359.22 | 94.43 o   |
| -2 | 3  | 15 | 86.28   | 34.34   | 14.31 <   |
| -1 | 3  | 15 | 94.09   | 103.01  | 20.03 o   |
| 0  | 3  | 15 | 19.74   | 5.72    | 14.31 <   |
| 1  | 3  | 15 | 24.42   | 25.75   | 20.03 <   |
| 2  | 3  | 15 | 3.28    | 37.20   | 14.31 <   |
| 3  | 3  | 15 | 980.86  | 1410.73 | 194.58 o  |
| 4  | 3  | 15 | 20.35   | 14.31   | 11.45 <   |
| 5  | 3  | 15 | 549.65  | 5.72    | 31.48 <   |
| -6 | 4  | 15 | 10.47   | -5.72   | 14.31 <   |
| -5 | 4  | 15 | 6.90    | 0.00    | 14.31 <   |
| -4 | 4  | 15 | 14.68   | 31.48   | 17.17 <   |
| -3 | 4  | 15 | 0.58    | -5.72   | 17.17 <   |
| -2 | 4  | 15 | 0.05    | -2.86   | 11.45 <   |
| -1 | 4  | 15 | 5.75    | 0.00    | 11.45 <   |
| 0  | 4  | 15 | 23.15   | 17.17   | 14.31 <   |

## paulkerrite.cif

|    |   |    |         |         |           |
|----|---|----|---------|---------|-----------|
| 1  | 4 | 15 | 0.05    | 0.00    | 45.78 <   |
| 2  | 4 | 15 | 5.14    | 0.00    | 11.45 <   |
| 3  | 4 | 15 | 1.22    | -2.86   | 11.45 <   |
| 4  | 4 | 15 | 3.07    | 11.45   | 17.17 <   |
| 5  | 4 | 15 | 14.08   | 11.45   | 37.20 <   |
| -6 | 5 | 15 | 55.67   | 14.31   | 14.31 <   |
| -5 | 5 | 15 | 1024.85 | 1817.06 | 3368.00 < |
| -4 | 5 | 15 | 769.77  | 460.70  | 163.11 <  |
| -3 | 5 | 15 | 1076.97 | 990.08  | 91.57 o   |
| -1 | 5 | 15 | 1289.31 | 1293.40 | 65.81 o   |
| 0  | 5 | 15 | 14.43   | 5.72    | 14.31 <   |
| 1  | 5 | 15 | 793.40  | 950.02  | 54.37 o   |
| 2  | 5 | 15 | 93.87   | 28.62   | 14.31 <   |
| 5  | 5 | 15 | 680.84  | -11.45  | 248.95 <  |
| -6 | 6 | 15 | 7.86    | 2.86    | 20.03 <   |
| -5 | 6 | 15 | 11.11   | 11.45   | 17.17 <   |
| -4 | 6 | 15 | 2.05    | -2.86   | 14.31 <   |
| -3 | 6 | 15 | 20.05   | 20.03   | 17.17 <   |
| -2 | 6 | 15 | 5.75    | 5.72    | 11.45 <   |
| -1 | 6 | 15 | 10.48   | 8.58    | 14.31 <   |
| 0  | 6 | 15 | 34.05   | 28.62   | 14.31 <   |
| 1  | 6 | 15 | 20.96   | 8.58    | 14.31 <   |
| 2  | 6 | 15 | 0.31    | 2.86    | 11.45 <   |
| 3  | 6 | 15 | 1.43    | 2.86    | 14.31 <   |
| 4  | 6 | 15 | 2.70    | -2.86   | 20.03 <   |
| 5  | 6 | 15 | 0.17    | 11.45   | 34.34 <   |
| -6 | 7 | 15 | 17.67   | 11.45   | 31.48 <   |
| -5 | 7 | 15 | 244.82  | 340.52  | 40.06 o   |
| -4 | 7 | 15 | 1237.34 | 1061.62 | 652.42 <  |
| -3 | 7 | 15 | 234.24  | 160.24  | 34.34 o   |
| -2 | 7 | 15 | 20.51   | 17.17   | 14.31 <   |
| -1 | 7 | 15 | 281.20  | 260.40  | 134.49 <  |
| 0  | 7 | 15 | 0.41    | 11.45   | 14.31 <   |
| 1  | 7 | 15 | 481.34  | 283.29  | 40.06 o   |
| 2  | 7 | 15 | 17.88   | 57.23   | 14.31 o   |
| 3  | 7 | 15 | 482.23  | 340.52  | 54.37 o   |
| 4  | 7 | 15 | 1739.57 | 48.65   | 1937.24 < |
| 5  | 7 | 15 | 128.83  | 0.00    | 37.20 <   |
| -5 | 8 | 15 | 0.38    | -2.86   | 14.31 <   |
| -4 | 8 | 15 | 65.82   | 74.40   | 17.17 o   |
| -3 | 8 | 15 | 0.18    | 5.72    | 14.31 <   |
| -2 | 8 | 15 | 9.91    | 2.86    | 11.45 <   |
| -1 | 8 | 15 | 5.70    | 11.45   | 14.31 <   |
| 0  | 8 | 15 | 0.58    | 2.86    | 11.45 <   |
| 1  | 8 | 15 | 52.48   | 42.92   | 20.03 <   |
| 2  | 8 | 15 | 6.51    | 5.72    | 14.31 <   |
| 3  | 8 | 15 | 21.48   | 8.58    | 14.31 <   |
| 4  | 8 | 15 | 22.81   | 71.54   | 34.34 <   |
| 5  | 8 | 15 | 0.88    | 8.58    | 34.34 <   |
| -5 | 9 | 15 | 137.84  | 51.51   | 17.17 <   |
| -4 | 9 | 15 | 342.13  | 148.80  | 723.96 <  |
| -3 | 9 | 15 | 843.37  | 666.73  | 54.37 o   |
| -2 | 9 | 15 | 119.55  | 25.75   | 17.17 <   |
| -1 | 9 | 15 | 35.07   | 20.03   | 14.31 <   |

## paulkerrite.cif

|    |    |    |         |         |           |
|----|----|----|---------|---------|-----------|
| 0  | 9  | 15 | 15.02   | 0.00    | 20.03 <   |
| 1  | 9  | 15 | 73.43   | 105.88  | 128.77 <  |
| 2  | 9  | 15 | 38.04   | 20.03   | 14.31 <   |
| 3  | 9  | 15 | 560.60  | -31.48  | 208.89 <  |
| 4  | 9  | 15 | 360.65  | 243.23  | 54.37 o   |
| -5 | 10 | 15 | 1.02    | -2.86   | 20.03 <   |
| -4 | 10 | 15 | 0.12    | -5.72   | 17.17 <   |
| -3 | 10 | 15 | 5.43    | -2.86   | 14.31 <   |
| -2 | 10 | 15 | 23.20   | 8.58    | 20.03 <   |
| -1 | 10 | 15 | 5.71    | 14.31   | 14.31 <   |
| 0  | 10 | 15 | 60.88   | 57.23   | 17.17 o   |
| 1  | 10 | 15 | 0.17    | 2.86    | 14.31 <   |
| 2  | 10 | 15 | 44.48   | 5.72    | 14.31 <   |
| 3  | 10 | 15 | 0.22    | 2.86    | 20.03 <   |
| 4  | 10 | 15 | 26.96   | 8.58    | 22.89 <   |
| -5 | 11 | 15 | 595.11  | 423.50  | 77.26 o   |
| -4 | 11 | 15 | 36.10   | 8.58    | 17.17 <   |
| -3 | 11 | 15 | 676.23  | 300.46  | 71.54 o   |
| -1 | 11 | 15 | 655.04  | 429.23  | 54.37 o   |
| 0  | 11 | 15 | 19.65   | 8.58    | 14.31 <   |
| 1  | 11 | 15 | 1180.13 | 1104.54 | 203.17 o  |
| 2  | 11 | 15 | 334.52  | 5.72    | 291.87 <  |
| 4  | 11 | 15 | 33.72   | 22.89   | 25.75 <   |
| -4 | 12 | 15 | 41.06   | 20.03   | 20.03 <   |
| -3 | 12 | 15 | 0.13    | 2.86    | 14.31 <   |
| -2 | 12 | 15 | 51.28   | 11.45   | 14.31 <   |
| -1 | 12 | 15 | 87.55   | 25.75   | 85.85 <   |
| 0  | 12 | 15 | 1.32    | -2.86   | 14.31 <   |
| 1  | 12 | 15 | 167.06  | 54.37   | 31.48 <   |
| 2  | 12 | 15 | 26.40   | 17.17   | 20.03 <   |
| 3  | 12 | 15 | 4.47    | 0.00    | 28.62 <   |
| 4  | 12 | 15 | 15.98   | 20.03   | 22.89 <   |
| -4 | 13 | 15 | 75.27   | 54.37   | 42.92 <   |
| -3 | 13 | 15 | 427.25  | 260.40  | 97.29 <   |
| -2 | 13 | 15 | 361.02  | 62.95   | 151.66 <  |
| -1 | 13 | 15 | 580.38  | 311.90  | 1250.48 < |
| 0  | 13 | 15 | 2.21    | 5.72    | 14.31 <   |
| 1  | 13 | 15 | 323.14  | 143.08  | 62.95 <   |
| 2  | 13 | 15 | 481.77  | 5.72    | 804.09 <  |
| 3  | 13 | 15 | 527.58  | 726.82  | 94.43 o   |
| 4  | 13 | 15 | 5.69    | 17.17   | 22.89 <   |
| -4 | 14 | 15 | 111.64  | 11.45   | 5502.69 < |
| -3 | 14 | 15 | 5.69    | 2.86    | 17.17 <   |
| -2 | 14 | 15 | 4.60    | 2.86    | 17.17 <   |
| -1 | 14 | 15 | 1.99    | 2.86    | 14.31 <   |
| 0  | 14 | 15 | 265.20  | 134.49  | 775.47 <  |
| 1  | 14 | 15 | 0.09    | 5.72    | 22.89 <   |
| 2  | 14 | 15 | 8.90    | 11.45   | 22.89 <   |
| 3  | 14 | 15 | 0.23    | 2.86    | 20.03 <   |
| 4  | 14 | 15 | 116.85  | 0.00    | 34.34 <   |
| -3 | 15 | 15 | 590.01  | 40.06   | 663.87 <  |
| -2 | 15 | 15 | 165.28  | 5.72    | 25.75 <   |
| -1 | 15 | 15 | 241.04  | 2.86    | 34.34 <   |
| 0  | 15 | 15 | 1.42    | 2.86    | 14.31 <   |



## paulkerrite.cif

|    |    |    |         |         |           |
|----|----|----|---------|---------|-----------|
| 1  | 15 | 15 | 193.04  | 51.51   | 25.75 <   |
| 2  | 15 | 15 | 147.74  | 28.62   | 25.75 <   |
| 3  | 15 | 15 | 714.85  | 22.89   | 1774.14 < |
| -3 | 16 | 15 | 20.94   | -2.86   | 28.62 <   |
| -2 | 16 | 15 | 13.90   | 2.86    | 20.03 <   |
| -1 | 16 | 15 | 2.53    | 2.86    | 20.03 <   |
| 1  | 16 | 15 | 0.94    | 0.00    | 22.89 <   |
| 2  | 16 | 15 | 8.93    | 11.45   | 28.62 <   |
| 3  | 16 | 15 | 20.05   | 25.75   | 28.62 <   |
| -2 | 17 | 15 | 175.70  | -14.31  | 22.89 <   |
| -5 | 0  | 16 | 44.41   | -2.86   | 34.34 <   |
| -4 | 0  | 16 | 799.33  | 812.67  | 91.57 o   |
| -3 | 0  | 16 | 980.32  | 792.64  | 91.57 o   |
| -2 | 0  | 16 | 21.25   | 65.81   | 28.62 <   |
| 0  | 0  | 16 | 4368.33 | 2930.19 | 248.95 o  |
| 1  | 0  | 16 | 2476.23 | 2592.53 | 154.52 o  |
| 2  | 0  | 16 | 43.93   | 5.72    | 34.34 <   |
| 3  | 0  | 16 | 766.64  | 206.03  | 194.58 <  |
| -5 | 1  | 16 | 117.79  | 11.45   | 25.75 <   |
| -4 | 1  | 16 | 142.17  | 131.63  | 25.75 o   |
| -3 | 1  | 16 | 43.03   | 48.65   | 20.03 <   |
| -2 | 1  | 16 | 58.68   | 34.34   | 20.03 <   |
| -1 | 1  | 16 | 57.36   | 5.72    | 28.62 <   |
| 0  | 1  | 16 | 21.34   | 8.58    | 20.03 <   |
| 1  | 1  | 16 | 160.59  | 125.91  | 71.54 <   |
| 2  | 1  | 16 | 59.13   | 48.65   | 17.17 <   |
| 3  | 1  | 16 | 21.22   | 37.20   | 11.45 o   |
| -5 | 2  | 16 | 78.63   | 42.92   | 20.03 <   |
| -4 | 2  | 16 | 38.75   | 11.45   | 17.17 <   |
| -3 | 2  | 16 | 253.59  | 197.44  | 34.34 o   |
| -2 | 2  | 16 | 18.25   | -5.72   | 17.17 <   |
| -1 | 2  | 16 | 695.01  | 635.26  | 48.65 o   |
| 0  | 2  | 16 | 165.95  | 97.29   | 20.03 o   |
| 1  | 2  | 16 | 620.53  | 557.99  | 57.23 o   |
| 2  | 2  | 16 | 115.92  | 37.20   | 14.31 <   |
| 3  | 2  | 16 | 102.44  | 77.26   | 17.17 o   |
| -5 | 3  | 16 | 59.40   | -5.72   | 14.31 <   |
| -4 | 3  | 16 | 83.78   | 31.48   | 171.69 <  |
| -3 | 3  | 16 | 46.74   | 17.17   | 100.15 <  |
| -2 | 3  | 16 | 105.45  | 71.54   | 82.98 <   |
| -1 | 3  | 16 | 25.56   | 14.31   | 14.31 <   |
| 0  | 3  | 16 | 10.15   | 0.00    | 34.34 <   |
| 1  | 3  | 16 | 3.84    | 22.89   | 14.31 <   |
| 2  | 3  | 16 | 157.77  | 134.49  | 20.03 o   |
| 3  | 3  | 16 | 43.25   | 25.75   | 37.20 <   |
| -4 | 4  | 16 | 107.20  | 85.85   | 168.83 <  |
| -3 | 4  | 16 | 428.63  | 203.17  | 74.40 <   |
| -2 | 4  | 16 | 736.87  | 987.22  | 74.40 o   |
| -1 | 4  | 16 | 72.30   | 82.98   | 20.03 o   |
| 1  | 4  | 16 | 23.25   | 80.12   | 20.03 o   |
| 2  | 4  | 16 | 731.53  | 861.32  | 165.97 o  |
| 3  | 4  | 16 | 565.14  | 117.32  | 203.17 <  |
| -5 | 5  | 16 | 121.38  | 42.92   | 48.65 <   |
| -4 | 5  | 16 | 33.84   | 17.17   | 68.68 <   |

## paulkerrite.cif

|    |    |    |         |         |          |
|----|----|----|---------|---------|----------|
| -3 | 5  | 16 | 31.75   | -8.58   | 183.14 < |
| -2 | 5  | 16 | 5.40    | 2.86    | 14.31 <  |
| -1 | 5  | 16 | 64.18   | 62.95   | 17.17 o  |
| 0  | 5  | 16 | 3.30    | -5.72   | 452.12 < |
| 1  | 5  | 16 | 37.64   | 42.92   | 14.31 <  |
| 2  | 5  | 16 | 40.49   | 11.45   | 11.45 <  |
| 3  | 5  | 16 | 187.62  | 117.32  | 40.06 <  |
| -5 | 6  | 16 | 111.92  | -2.86   | 31.48 <  |
| -4 | 6  | 16 | 266.47  | 62.95   | 60.09 <  |
| -3 | 6  | 16 | 166.45  | 117.32  | 867.04 < |
| -2 | 6  | 16 | 74.94   | 25.75   | 14.31 <  |
| -1 | 6  | 16 | 0.45    | 28.62   | 14.31 <  |
| 0  | 6  | 16 | 437.17  | 357.69  | 34.34 o  |
| 1  | 6  | 16 | 1.39    | 40.06   | 17.17 <  |
| 3  | 6  | 16 | 250.67  | 197.44  | 48.65 o  |
| -5 | 7  | 16 | 84.05   | 2.86    | 28.62 <  |
| -4 | 7  | 16 | 9.29    | 2.86    | 14.31 <  |
| -3 | 7  | 16 | 150.01  | 60.09   | 22.89 <  |
| -2 | 7  | 16 | 19.64   | 5.72    | 11.45 <  |
| -1 | 7  | 16 | 2.36    | 8.58    | 14.31 <  |
| 0  | 7  | 16 | 0.09    | 2.86    | 14.31 <  |
| 1  | 7  | 16 | 23.02   | 14.31   | 14.31 <  |
| 2  | 7  | 16 | 0.79    | 0.00    | 22.89 <  |
| 3  | 7  | 16 | 327.24  | 20.03   | 723.96 < |
| -4 | 8  | 16 | 270.81  | 148.80  | 31.48 o  |
| -3 | 8  | 16 | 28.61   | 34.34   | 14.31 <  |
| -2 | 8  | 16 | 320.41  | 268.98  | 40.06 o  |
| -1 | 8  | 16 | 10.12   | 14.31   | 14.31 <  |
| 0  | 8  | 16 | 1022.88 | 1167.50 | 68.68 o  |
| 1  | 8  | 16 | 11.75   | 14.31   | 17.17 <  |
| 3  | 8  | 16 | 5.69    | 51.51   | 25.75 <  |
| -4 | 9  | 16 | 18.73   | 2.86    | 17.17 <  |
| -3 | 9  | 16 | 62.93   | 25.75   | 17.17 <  |
| -2 | 9  | 16 | 197.11  | 85.85   | 22.89 o  |
| -1 | 9  | 16 | 0.53    | -2.86   | 11.45 <  |
| 0  | 9  | 16 | 13.54   | 5.72    | 11.45 <  |
| 1  | 9  | 16 | 15.62   | 2.86    | 22.89 <  |
| 2  | 9  | 16 | 147.79  | 0.00    | 31.48 <  |
| 3  | 9  | 16 | 17.68   | 25.75   | 22.89 <  |
| -4 | 10 | 16 | 673.96  | 88.71   | 62.95 <  |
| -3 | 10 | 16 | 1223.45 | 649.56  | 134.49 o |
| -2 | 10 | 16 | 118.69  | 68.68   | 466.43 < |
| -1 | 10 | 16 | 283.46  | 231.78  | 125.91 < |
| 0  | 10 | 16 | 165.91  | 48.65   | 48.65 <  |
| 1  | 10 | 16 | 378.95  | 417.78  | 65.81 o  |
| 2  | 10 | 16 | 2.62    | 45.78   | 25.75 <  |
| 3  | 10 | 16 | 611.99  | 274.70  | 51.51 o  |
| -4 | 11 | 16 | 8.30    | 0.00    | 25.75 <  |
| -3 | 11 | 16 | 60.52   | 5.72    | 20.03 <  |
| -2 | 11 | 16 | 12.47   | 0.00    | 14.31 <  |
| -1 | 11 | 16 | 8.01    | -2.86   | 11.45 <  |
| 0  | 11 | 16 | 1.74    | 0.00    | 14.31 <  |
| 1  | 11 | 16 | 77.90   | 54.37   | 28.62 <  |
| 2  | 11 | 16 | 1.61    | 2.86    | 20.03 <  |

## paulkerrite.cif

|    |    |    |         |         |           |
|----|----|----|---------|---------|-----------|
| 3  | 11 | 16 | 55.92   | -8.58   | 31.48 <   |
| -3 | 12 | 16 | 422.39  | 88.71   | 423.50 <  |
| -2 | 12 | 16 | 213.44  | 80.12   | 4581.28 < |
| -1 | 12 | 16 | 598.41  | 28.62   | 34.34 <   |
| 0  | 12 | 16 | 966.66  | 815.53  | 100.15 o  |
| 2  | 12 | 16 | 113.06  | 60.09   | 28.62 <   |
| -3 | 13 | 16 | 22.18   | -20.03  | 31.48 <   |
| -2 | 13 | 16 | 130.36  | 17.17   | 2074.60 < |
| -1 | 13 | 16 | 55.72   | -11.45  | 40.06 <   |
| 0  | 13 | 16 | 0.48    | -8.58   | 31.48 <   |
| 1  | 13 | 16 | 20.53   | 2.86    | 20.03 <   |
| 2  | 13 | 16 | 55.29   | 45.78   | 25.75 <   |
| -2 | 14 | 16 | 239.60  | -17.17  | 615.22 <  |
| 1  | 14 | 16 | 169.70  | -11.45  | 28.62 <   |
| 2  | 14 | 16 | 408.97  | 57.23   | 346.24 <  |
| -4 | 1  | 17 | 321.34  | 120.18  | 31.48 o   |
| -3 | 1  | 17 | 7.00    | 2.86    | 14.31 <   |
| -2 | 1  | 17 | 26.52   | -8.58   | 14.31 <   |
| -1 | 1  | 17 | 384.82  | -20.03  | 28.62 <   |
| 0  | 1  | 17 | 12.74   | 0.00    | 17.17 <   |
| 1  | 1  | 17 | 537.74  | 200.31  | 200.31 <  |
| -4 | 2  | 17 | 81.69   | 17.17   | 22.89 <   |
| -3 | 2  | 17 | 32.77   | 2.86    | 14.31 <   |
| -2 | 2  | 17 | 93.61   | 94.43   | 22.89 o   |
| -1 | 2  | 17 | 0.26    | 0.00    | 31.48 <   |
| 0  | 2  | 17 | 341.70  | 160.24  | 343.38 <  |
| 1  | 2  | 17 | 32.30   | 17.17   | 14.31 <   |
| -4 | 3  | 17 | 19.45   | -14.31  | 31.48 <   |
| -3 | 3  | 17 | 0.05    | 0.00    | 11.45 <   |
| -2 | 3  | 17 | 102.43  | -2.86   | 103.01 <  |
| -1 | 3  | 17 | 375.76  | 194.58  | 460.70 <  |
| 0  | 3  | 17 | 2.60    | 11.45   | 17.17 <   |
| 1  | 3  | 17 | 383.22  | 37.20   | 40.06 <   |
| -4 | 4  | 17 | 16.52   | 2.86    | 25.75 <   |
| -3 | 4  | 17 | 1.52    | 5.72    | 14.31 <   |
| -2 | 4  | 17 | 9.08    | -2.86   | 128.77 <  |
| -1 | 4  | 17 | 92.96   | 37.20   | 37.20 <   |
| 0  | 4  | 17 | 86.92   | 68.68   | 20.03 o   |
| 1  | 4  | 17 | 36.30   | 31.48   | 28.62 <   |
| -4 | 5  | 17 | 30.93   | 2.86    | 25.75 <   |
| -3 | 5  | 17 | 9.68    | 0.00    | 11.45 <   |
| -1 | 5  | 17 | 2060.02 | 1608.17 | 114.46 o  |
| 0  | 5  | 17 | 48.75   | 31.48   | 88.71 <   |
| 1  | 5  | 17 | 1602.89 | 729.68  | 125.91 o  |
| -3 | 6  | 17 | 27.08   | 8.58    | 14.31 <   |
| -2 | 6  | 17 | 14.85   | 5.72    | 51.51 <   |
| -1 | 6  | 17 | 3.17    | -2.86   | 14.31 <   |
| 0  | 6  | 17 | 5.02    | 8.58    | 11.45 <   |
| 1  | 6  | 17 | 0.41    | 2.86    | 20.03 <   |
| -3 | 7  | 17 | 4.50    | 5.72    | 14.31 <   |
| -2 | 7  | 17 | 575.34  | 151.66  | 77.26 <   |
| -1 | 7  | 17 | 2003.62 | 1261.93 | 331.93 o  |
| 0  | 7  | 17 | 49.69   | 5.72    | 25.75 <   |
| 1  | 7  | 17 | 1673.88 | 2054.57 | 191.72 o  |

paulkerrite.cif

|    |    |    |        |         |           |
|----|----|----|--------|---------|-----------|
| -3 | 8  | 17 | 0.16   | 2.86    | 14.31 <   |
| -2 | 8  | 17 | 4.14   | 0.00    | 14.31 <   |
| -1 | 8  | 17 | 42.14  | 0.00    | 14.31 <   |
| 0  | 8  | 17 | 31.55  | 45.78   | 25.75 <   |
| 1  | 8  | 17 | 8.83   | 17.17   | 25.75 <   |
| -3 | 9  | 17 | 0.26   | 8.58    | 25.75 <   |
| -2 | 9  | 17 | 77.30  | 5.72    | 14.31 <   |
| -1 | 9  | 17 | 385.77 | -48.65  | 62.95 <   |
| 0  | 9  | 17 | 0.75   | -8.58   | 22.89 <   |
| -3 | 10 | 17 | 27.84  | -8.58   | 28.62 <   |
| -2 | 10 | 17 | 46.51  | 5.72    | 14.31 <   |
| -1 | 10 | 17 | 13.49  | -5.72   | 25.75 <   |
| 0  | 10 | 17 | 143.70 | 17.17   | 37.20 <   |
| 1  | 10 | 17 | 4.21   | 11.45   | 25.75 <   |
| 0  | 11 | 17 | 0.03   | 0.00    | 37.20 <   |
| 1  | 11 | 17 | 99.70  | -5.72   | 140.21 <  |
| 1  | 12 | 17 | 1.30   | 0.00    | 25.75 <   |
| -2 | 0  | 18 | 251.25 | -57.23  | 25.75 <   |
| -1 | 0  | 18 | 407.17 | -100.15 | 145.94 <  |
| -2 | 1  | 18 | 38.36  | -17.17  | 51.51 <   |
| -1 | 1  | 18 | 344.00 | -51.51  | 497.90 <  |
| -2 | 2  | 18 | 733.61 | -77.26  | 1550.94 < |
| -1 | 2  | 18 | 143.38 | 37.20   | 48.65 <   |
| -2 | 3  | 18 | 52.81  | -11.45  | 154.52 <  |
| -1 | 3  | 18 | 25.50  | 0.00    | 25.75 <   |
| -2 | 4  | 18 | 217.84 | -11.45  | 62.95 <   |
| -1 | 4  | 18 | 78.93  | -2.86   | 28.62 <   |
| -1 | 5  | 18 | 67.01  | -28.62  | 80.12 <   |
| -1 | 6  | 18 | 15.30  | -5.72   | 34.34 <   |

loop\_

\_twin\_refl\_n\_datum\_id  
\_twin\_refl\_n\_individual\_id  
\_twin\_refl\_n\_index\_h  
\_twin\_refl\_n\_index\_k  
\_twin\_refl\_n\_index\_l  
\_twin\_refl\_n\_F\_squared\_calc  
\_twin\_refl\_n\_F\_squared\_meas  
\_twin\_refl\_n\_F\_squared\_sigma  
\_twin\_refl\_n\_include\_status  
? ? ? ? ? ? ? ? ?
